# Supplementary material for: Epithelial geometry regulates spindle orientation and progenitor fate during formation of the mammalian epidermis
Source: eLife journal article supplement (doi:10.7554/elife.47102), 2019-06-12
Supplement: supp [file DivisionAngles.xlsx]

## Sheet: WT
Item	Source	Length xyz	Length xy	Height	ND.T	ND.Z	ND.M	Comment		sin theta	angle_radians	angle_degrees
1	e13WT1_dapi_khg_mtmg_flank_001.nd2	10.07	10.02	1	0	0	0			0.0993049	0.0994688	5.69914
2	e13WT1_dapi_khg_mtmg_flank_001.nd2	10.88	9.39	5.5	0	0	0			0.505515	0.529978	30.3655
3	e13WT1_dapi_khg_mtmg_flank_001.nd2	11.35	10.95	3	0	0	0			0.264317	0.267496	15.3264
4	e13WT1_dapi_khg_mtmg_flank_002.nd2	11.77	11.39	3	0	0	0			0.254885	0.257729	14.7668
5	e13WT1_dapi_khg_mtmg_flank_002.nd2	14.71	14.16	4	0	0	0			0.271924	0.275392	15.7788
6	e13WT1_dapi_khg_mtmg_flank_002.nd2	13.91	13.33	4	0	0	0			0.287563	0.291681	16.7121
7	e13WT1_dapi_khg_mtmg_flank_003.nd2	8.72	6.77	5.5	0	0	0			0.630734	0.682499	39.1043
8	e13WT1_dapi_khg_mtmg_flank_003.nd2	9.85	8.76	4.5	0	0	0			0.456853	0.474454	27.1842
9	e13WT1_dapi_khg_mtmg_flank_004.nd2	8.55	8.53	0.5	0	0	0			0.0584795	0.0585129	3.35254
10	e13WT1_dapi_khg_mtmg_flank_004.nd2	9.57	8.45	4.5	0	0	0			0.470219	0.489539	28.0485
11	e13WT1_dapi_khg_mtmg_flank_004.nd2	11.61	11.57	1	0	0	0			0.0861326	0.0862395	4.94116
12	e13WT1_dapi_khg_mtmg_flank_004.nd2	6.48	3.43	5.5	0	0	0			0.848765	1.01365	58.0776
13	e13WT1_dapi_khg_mtmg_flank_005.nd2	7.27	7.26	0.5	0	0	0			0.0687758	0.0688301	3.94368
14	e13WT1_dapi_khg_mtmg_flank_005.nd2	10.29	10.24	1	0	0	0			0.0971817	0.0973354	5.5769
15	e13WT1_dapi_khg_mtmg_flank_005.nd2	13.23	13.23	0	0	0	0			0	0	0
16	e13WT1_dapi_khg_mtmg_flank_005.nd2	8.28	5.71	6	0	0	0			0.724638	0.810508	46.4387
17	e13WT1_dapi_khg_mtmg_flank_005.nd2	11.73	11.63	1.5	0	0	0			0.127877	0.128228	7.34694
18	e13WT1_dapi_khg_mtmg_flank_006.nd2	14.01	13.93	1.5	0	0	0			0.107066	0.107272	6.14623
19	e13WT1_dapi_khg_mtmg_flank_006.nd2	7.62	5.27	5.5	0	0	0			0.721785	0.806378	46.202
20	e13WT1_dapi_khg_mtmg_flank_006.nd2	5.79	1.82	5.5	0	0	0			0.949914	1.25296	71.7893
21	e13WT1_dapi_khg_mtmg_flank_006.nd2	12	12	0	0	0	0			0	0	0
22	e13WT1_dapi_khg_mtmg_flank_007.nd2	14.63	14.55	1.5	0	0	0			0.102529	0.10271	5.88482
23	e13WT1_dapi_khg_mtmg_flank_007.nd2	14.14	14.13	0.5	0	0	0			0.0353607	0.0353681	2.02644
24	e13WT1_dapi_khg_mtmg_flank_007.nd2	8.78	7.22	5	0	0	0			0.569476	0.605868	34.7137
25	e13WT1_dapi_khg_mtmg_flank_008.nd2	14.17	14.16	0.5	0	0	0			0.0352858	0.0352931	2.02215
26	e13WT1_dapi_khg_mtmg_flank_008.nd2	6.64	4.38	5	0	0	0			0.753012	0.852628	48.852
27	e13WT1_dapi_khg_mtmg_flank_008.nd2	8.81	8.45	2.5	0	0	0			0.283768	0.287722	16.4852
28	e13WT1_dapi_khg_mtmg_flank_008.nd2	6.65	3.74	5.5	0	0	0			0.827068	0.973871	55.7987
29	e13WT1_dapi_khg_mtmg_flank_009.nd2	14.69	14.68	0.5	0	0	0			0.0340368	0.0340433	1.95054
30	e13WT1_dapi_khg_mtmg_flank_009.nd2	12.75	12.75	0	0	0	0			0	0	0
31	e13WT1_dapi_khg_mtmg_flank_009.nd2	10.76	8.58	6.5	0	0	0			0.604089	0.648622	37.1633
32	e13WT1_dapi_khg_mtmg_flank_009.nd2	10.7	10.69	0.5	0	0	0			0.046729	0.046746	2.67835
33	e13WT1_dapi_khg_mtmg_flank_009.nd2	12.66	12.66	0	0	0	0			0	0	0
34	e13WT1_dapi_khg_mtmg_flank_010.nd2	10.38	10.08	2.5	0	0	0			0.240848	0.243239	13.9366
35	e13WT1_dapi_khg_mtmg_flank_010.nd2	10.49	10.05	3	0	0	0			0.285987	0.290036	16.6178
36	e13WT1_dapi_khg_mtmg_flank_010.nd2	8.73	6.34	6	0	0	0			0.687285	0.757745	43.4156
37	e13WT2_dapi_khg_mtmg_flank_001.nd2	6.42	5.38	3.5	0	0	0			0.545171	0.576593	33.0364
38	e13WT2_dapi_khg_mtmg_flank_001.nd2	10.03	10.02	0.5	0	0	0			0.0498504	0.0498711	2.8574
39	e13WT2_dapi_khg_mtmg_flank_002.nd2	10.11	10.11	0	0	0	0			0	0	0
40	e13WT2_dapi_khg_mtmg_flank_003.nd2	13.7	13.67	1	0	0	0			0.0729927	0.0730577	4.1859
41	e13WT2_dapi_khg_mtmg_flank_003.nd2	10.31	10.12	2	0	0	0			0.193986	0.195224	11.1855
42	e13WT2_dapi_khg_mtmg_flank_003.nd2	10.25	9.94	2.5	0	0	0			0.243902	0.246388	14.117
43	e13WT2_dapi_khg_mtmg_flank_004.nd2	4.41	3.93	2	0	0	0			0.453515	0.470705	26.9694
44	e13WT2_dapi_khg_mtmg_flank_004.nd2	7.53	6.67	3.5	0	0	0			0.464807	0.483417	27.6978
45	e13WT2_dapi_khg_mtmg_flank_004.nd2	13.6	13.6	0	0	0	0			0	0	0
46	e13WT2_dapi_khg_mtmg_flank_004.nd2	14.4	14.39	0.5	0	0	0			0.0347222	0.0347292	1.98984
47	e13WT2_dapi_khg_mtmg_flank_005.nd2	12.12	12.11	0.5	0	0	0			0.0412541	0.0412658	2.36436
48	e13WT2_dapi_khg_mtmg_flank_005.nd2	9.31	8.97	2.5	0	0	0			0.268528	0.271865	15.5767
49	e13WT2_dapi_khg_mtmg_flank_005.nd2	10.41	10.41	0	0	0	0			0	0	0
50	e13WT2_dapi_khg_mtmg_flank_006.nd2	13.08	12.84	2.5	0	0	0			0.191131	0.192315	11.0188
51	e13WT2_dapi_khg_mtmg_flank_007.nd2	16.06	16.03	1	0	0	0			0.0622665	0.0623068	3.56992
52	e13WT2_dapi_khg_mtmg_flank_007.nd2	7.39	6.21	4	0	0	0			0.541272	0.571949	32.7703
53	e13WT2_dapi_khg_mtmg_flank_007.nd2	9.09	8.87	2	0	0	0			0.220022	0.221837	12.7103
54	e13WT2_dapi_khg_mtmg_flank_007.nd2	10.89	10.89	0	0	0	0			0	0	0
55	e13WT2_dapi_khg_mtmg_flank_008.nd2	9.72	9.24	3	0	0	0			0.308642	0.313765	17.9774
56	e13WT2_dapi_khg_mtmg_flank_008.nd2	7.88	6.47	4.5	0	0	0			0.571066	0.607804	34.8246
57	e13WT2_dapi_khg_mtmg_flank_008.nd2	7.88	7.48	2.5	0	0	0			0.317259	0.322838	18.4972
58	e13WT2_dapi_khg_mtmg_flank_008.nd2	14.31	14.31	0	0	0	0			0	0	0
59	e13WT2_dapi_khg_mtmg_flank_008.nd2	10.37	9.76	3.5	0	0	0			0.337512	0.344273	19.7254
60	e13WT2_dapi_khg_mtmg_flank_008.nd2	10.58	10.54	1	0	0	0			0.094518	0.0946593	5.42358
61	e13WT2_dapi_khg_mtmg_flank_009.nd2	10.19	9.57	3.5	0	0	0			0.343474	0.350613	20.0887
62	e13WT2_dapi_khg_mtmg_flank_009.nd2	12.07	12.06	0.5	0	0	0			0.041425	0.0414369	2.37416
63	e13WT2_dapi_khg_mtmg_flank_010.nd2	11.39	11.38	0.5	0	0	0			0.0438982	0.0439123	2.51599
64	e13WT2_dapi_khg_mtmg_flank_010.nd2	10.68	10.68	0	0	0	0			0	0	0
65	e13WT2_dapi_khg_mtmg_flank_010.nd2	14.63	14.63	0	0	0	0			0	0	0
66	e13WT2_dapi_khg_mtmg_flank_010.nd2	9.6	9.11	3	0	0	0			0.3125	0.317824	18.21
67	e13WT3_dapi_khg_mtmg_flank_001.nd2	8.7	7.12	5	0	0	0			0.574713	0.612253	35.0795
68	e13WT3_dapi_khg_mtmg_flank_001.nd2	9.46	9.45	0.5	0	0	0			0.0528541	0.0528788	3.02973
69	e13WT3_dapi_khg_mtmg_flank_002.nd2	10.59	10.48	1.5	0	0	0			0.141643	0.142121	8.14293
70	e13WT3_dapi_khg_mtmg_flank_002.nd2	11.82	11.73	1.5	0	0	0			0.126904	0.127247	7.2907
71	e13WT3_dapi_khg_mtmg_flank_003.nd2	10.03	9.2	4	0	0	0			0.398804	0.410212	23.5034
72	e13WT3_dapi_khg_mtmg_flank_003.nd2	9.79	9.74	1	0	0	0			0.102145	0.102324	5.86271
73	e13WT3_dapi_khg_mtmg_flank_003.nd2	5.21	2.62	4.5	0	0	0			0.863724	1.04261	59.7373
74	e13WT3_dapi_khg_mtmg_flank_003.nd2	8.32	8.31	0.5	0	0	0			0.0600962	0.0601324	3.44533
75	e13WT3_dapi_khg_mtmg_flank_004.nd2	10.44	10.43	0.5	0	0	0			0.0478927	0.047911	2.7451
76	e13WT3_dapi_khg_mtmg_flank_004.nd2	5.85	5.02	3	0	0	0			0.512821	0.538467	30.8519
77	e13WT3_dapi_khg_mtmg_flank_004.nd2	9.41	9.2	2	0	0	0			0.21254	0.214173	12.2712
78	e13WT3_dapi_khg_mtmg_flank_004.nd2	8.34	7.02	4.5	0	0	0			0.539568	0.569924	32.6543
79	e13WT3_dapi_khg_mtmg_flank_004.nd2	10.42	10.41	0.5	0	0	0			0.0479846	0.0480031	2.75037
80	e13WT3_dapi_khg_mtmg_flank_004.nd2	10.69	10.1	3.5	0	0	0			0.327409	0.33356	19.1116
81	e13WT3_dapi_khg_mtmg_flank_005.nd2	11.32	11.32	0	0	0	0			0	0	0
82	e13WT3_dapi_khg_mtmg_flank_006.nd2	12.19	12.15	1	0	0	0			0.0820345	0.0821267	4.70552
83	e13WT3_dapi_khg_mtmg_flank_006.nd2	8.04	8.04	0	0	0	0			0	0	0
84	e13WT3_dapi_khg_mtmg_flank_006.nd2	9.23	9.17	1	0	0	0			0.108342	0.108555	6.21977
85	e13WT3_dapi_khg_mtmg_flank_006.nd2	11	10.71	2.5	0	0	0			0.227273	0.229276	13.1366
86	e13WT3_dapi_khg_mtmg_flank_007.nd2	9.27	9.27	0	0	0	0			0	0	0
87	e13WT3_dapi_khg_mtmg_flank_007.nd2	11.25	11.24	0.5	0	0	0			0.0444444	0.0444591	2.54732
88	e13WT3_dapi_khg_mtmg_flank_007.nd2	10.98	9.77	5	0	0	0			0.455373	0.472792	27.089
89	e13WT3_dapi_khg_mtmg_flank_007.nd2	10.86	9.88	4.5	0	0	0			0.414365	0.427245	24.4793
90	e13WT3_dapi_khg_mtmg_flank_008.nd2	14.72	14.68	1	0	0	0			0.0679348	0.0679871	3.89538
91	e13WT3_dapi_khg_mtmg_flank_008.nd2	12.3	12.14	2	0	0	0			0.162602	0.163327	9.35794
92	e13WT3_dapi_khg_mtmg_flank_009.nd2	9.42	4.97	8	0	0	0			0.849257	1.01458	58.1309
93	e13WT3_dapi_khg_mtmg_flank_009.nd2	11.14	11.13	0.5	0	0	0			0.0448833	0.0448984	2.57249
94	e13WT3_dapi_khg_mtmg_flank_009.nd2	12.66	12.65	0.5	0	0	0			0.0394945	0.0395047	2.26346
95	e13WT3_dapi_khg_mtmg_flank_010.nd2	10.41	10.41	0	0	0	0			0	0	0
96	e13WT3_dapi_khg_mtmg_flank_010.nd2	10.18	10.14	1	0	0	0			0.0982318	0.0983905	5.63736
97	e13WT3_dapi_khg_mtmg_flank_010.nd2	6.96	6.01	3.5	0	0	0			0.502874	0.52692	30.1903
98	e13WT3_dapi_khg_mtmg_flank_010.nd2	9.06	6.31	6.5	0	0	0			0.717439	0.800119	45.8435
99	e13WT3_dapi_khg_mtmg_flank_010.nd2	8.59	6.15	6	0	0	0			0.698487	0.773281	44.3057
Item	Source	Length xyz	Length xy	Height	ND.T	ND.Z	ND.M	Comment		sin theta	angle_radians	angle_degrees
1	e13WT1_dapi_khg_mtmg_between_001.nd2	13.13	13.13	0	0	0	0			0	0	0
2	e13WT1_dapi_khg_mtmg_between_001.nd2	14.29	14.07	2.5	0	0	0			0.174948	0.175852	10.0756
3	e13WT1_dapi_khg_mtmg_between_001.nd2	12.68	12.67	0.5	0	0	0			0.0394322	0.0394424	2.25988
4	e13WT1_dapi_khg_mtmg_between_001.nd2	10.27	10.26	0.5	0	0	0			0.0486855	0.0487047	2.79058
5	e13WT1_dapi_khg_mtmg_between_002.nd2	13.72	13.72	0	0	0	0			0	0	0
6	e13WT1_dapi_khg_mtmg_between_002.nd2	11.38	11.28	1.5	0	0	0			0.13181	0.132195	7.57421
7	e13WT1_dapi_khg_mtmg_between_002.nd2	13.07	12.44	4	0	0	0			0.306044	0.311035	17.821
8	e13WT1_dapi_khg_mtmg_between_003.nd2	7.53	7.1	2.5	0	0	0			0.332005	0.338429	19.3905
9	e13WT1_dapi_khg_mtmg_between_003.nd2	11.76	11.72	1	0	0	0			0.085034	0.0851368	4.87798
10	e13WT1_dapi_khg_mtmg_between_003.nd2	14.07	14.04	1	0	0	0			0.0710732	0.0711332	4.07563
11	e13WT1_dapi_khg_mtmg_between_003.nd2	12.48	12.44	1	0	0	0			0.0801282	0.0802142	4.59594
12	e13WT1_dapi_khg_mtmg_between_003.nd2	6.54	5.53	3.5	0	0	0			0.535168	0.564707	32.3553
13	e13WT1_dapi_khg_mtmg_between_004.nd2	12.58	12.54	1	0	0	0			0.0794913	0.0795752	4.55932
14	e13WT1_dapi_khg_mtmg_between_004.nd2	9.07	8.37	3.5	0	0	0			0.385888	0.39617	22.6989
15	e13WT1_dapi_khg_mtmg_between_004.nd2	8.33	8.27	1	0	0	0			0.120048	0.120338	6.89487
16	e13WT1_dapi_khg_mtmg_between_005.nd2	9.08	9.08	0	0	0	0			0	0	0
17	e13WT1_dapi_khg_mtmg_between_005.nd2	9.81	9.34	3	0	0	0			0.30581	0.310789	17.8069
18	e13WT1_dapi_khg_mtmg_between_005.nd2	9.29	9.24	1	0	0	0			0.107643	0.107852	6.17944
19	e13WT1_dapi_khg_mtmg_between_007.nd2	5.64	2.61	5	0	0	0			0.886525	1.08978	62.4398
20	e13WT1_dapi_khg_mtmg_between_007.nd2	11.8	11.41	3	0	0	0			0.254237	0.257059	14.7284
21	e13WT1_dapi_khg_mtmg_between_007.nd2	9.68	9.35	2.5	0	0	0			0.258264	0.261225	14.9671
22	e13WT1_dapi_khg_mtmg_between_007.nd2	12.67	12.66	0.5	0	0	0			0.0394633	0.0394735	2.26167
23	e13WT1_dapi_khg_mtmg_between_008.nd2	8.85	8.13	3.5	0	0	0			0.39548	0.406591	23.2959
24	e13WT1_dapi_khg_mtmg_between_008.nd2	9.55	8.67	4	0	0	0			0.418848	0.432176	24.7619
25	e13WT1_dapi_khg_mtmg_between_008.nd2	10.21	9.59	3.5	0	0	0			0.342801	0.349897	20.0476
26	e13WT1_dapi_khg_mtmg_between_008.nd2	10.47	9.45	4.5	0	0	0			0.429799	0.444271	25.4548
27	e13WT1_dapi_khg_mtmg_between_008.nd2	11.02	10.6	3	0	0	0			0.272232	0.275712	15.7971
28	e13WT1_dapi_khg_mtmg_between_009.nd2	7.56	7.49	1	0	0	0			0.132275	0.132664	7.60108
29	e13WT1_dapi_khg_mtmg_between_009.nd2	10.4	10.35	1	0	0	0			0.0961538	0.0963026	5.51773
30	e13WT1_dapi_khg_mtmg_between_009.nd2	11	10.99	0.5	0	0	0			0.0454545	0.0454702	2.60525
31	e13WT1_dapi_khg_mtmg_between_010.nd2	12.05	12.03	0.5	0	0	0			0.0414938	0.0415057	2.3781
32	e13WT1_dapi_khg_mtmg_between_010.nd2	8.11	7.05	4	0	0	0			0.493218	0.515785	29.5523
33	e13WT1_dapi_khg_mtmg_between_010.nd2	7.09	6.63	2.5	0	0	0			0.352609	0.360358	20.647
34	e13WT2_dapi_khg_mtmg_between_001.nd2	14.64	14.63	0.5	0	0	0			0.034153	0.0341596	1.9572
35	e13WT2_dapi_khg_mtmg_between_002.nd2	11.68	11.66	0.5	0	0	0			0.0428082	0.0428213	2.45348
36	e13WT2_dapi_khg_mtmg_between_002.nd2	9.64	9.59	1	0	0	0			0.103734	0.103921	5.95426
37	e13WT2_dapi_khg_mtmg_between_003.nd2	12.34	12.3	1	0	0	0			0.0810373	0.0811262	4.64819
38	e13WT2_dapi_khg_mtmg_between_004.nd2	11.78	11.77	0.5	0	0	0			0.0424448	0.0424576	2.43264
39	e13WT2_dapi_khg_mtmg_between_004.nd2	14.36	14.28	1.5	0	0	0			0.104457	0.104648	5.99587
40	e13WT2_dapi_khg_mtmg_between_004.nd2	9.53	8.66	4	0	0	0			0.419727	0.433145	24.8174
41	e13WT2_dapi_khg_mtmg_between_004.nd2	11.61	10.9	4	0	0	0			0.344531	0.351739	20.1531
42	e13WT2_dapi_khg_mtmg_between_004.nd2	12.17	12.08	1.5	0	0	0			0.123254	0.123568	7.07993
43	e13WT2_dapi_khg_mtmg_between_004.nd2	11.74	11.7	1	0	0	0			0.0851789	0.0852822	4.88631
44	e13WT2_dapi_khg_mtmg_between_005.nd2	12	11.83	2	0	0	0			0.166667	0.167448	9.59407
45	e13WT2_dapi_khg_mtmg_between_005.nd2	8.61	8.61	0	0	0	0			0	0	0
46	e13WT2_dapi_khg_mtmg_between_006.nd2	9.55	9.54	0.5	0	0	0			0.052356	0.05238	3.00115
47	e13WT2_dapi_khg_mtmg_between_006.nd2	9.48	9.43	1	0	0	0			0.105485	0.105682	6.05512
48	e13WT2_dapi_khg_mtmg_between_007.nd2	10.12	10.12	0	0	0	0			0	0	0
49	e13WT2_dapi_khg_mtmg_between_007.nd2	13.67	13.67	0	0	0	0			0	0	0
50	e13WT2_dapi_khg_mtmg_between_008.nd2	13.54	13.53	0.5	0	0	0			0.0369276	0.036936	2.11628
51	e13WT2_dapi_khg_mtmg_between_008.nd2	9.33	9.11	2	0	0	0			0.214362	0.216039	12.3781
52	e13WT2_dapi_khg_mtmg_between_009.nd2	10.05	9.85	2	0	0	0			0.199005	0.200342	11.4788
53	e13WT2_dapi_khg_mtmg_between_009.nd2	10.15	10.1	1	0	0	0			0.0985222	0.0986823	5.65408
54	e13WT2_dapi_khg_mtmg_between_009.nd2	9.43	8.29	4.5	0	0	0			0.4772	0.497466	28.5027
55	e13WT2_dapi_khg_mtmg_between_009.nd2	13.53	13.52	0.5	0	0	0			0.0369549	0.0369633	2.11784
56	e13WT2_dapi_khg_mtmg_between_010.nd2	11.97	11.93	1	0	0	0			0.0835422	0.0836397	4.7922
57	e13WT2_dapi_khg_mtmg_between_010.nd2	13.95	13.95	0	0	0	0			0	0	0
58	e13WT2_dapi_khg_mtmg_between_010.nd2	10.62	10.61	0.5	0	0	0			0.047081	0.0470984	2.69854
59	e13WT3_dapi_khg_mtmg_between_001.nd2	12.37	12.36	0.5	0	0	0			0.0404204	0.0404314	2.31655
60	e13WT3_dapi_khg_mtmg_between_001.nd2	7.77	7.17	3	0	0	0			0.3861	0.3964	22.7121
61	e13WT3_dapi_khg_mtmg_between_001.nd2	12.25	12.21	1	0	0	0			0.0816327	0.0817236	4.68242
62	e13WT3_dapi_khg_mtmg_between_001.nd2	10.57	10.46	1.5	0	0	0			0.141911	0.142392	8.15845
63	e13WT3_dapi_khg_mtmg_between_002.nd2	13.68	13.64	1	0	0	0			0.0730994	0.0731647	4.19203
64	e13WT3_dapi_khg_mtmg_between_002.nd2	9.37	8.22	4.5	0	0	0			0.480256	0.500947	28.7021
65	e13WT3_dapi_khg_mtmg_between_002.nd2	10.76	10.75	0.5	0	0	0			0.0464684	0.0464851	2.6634
66	e13WT3_dapi_khg_mtmg_between_003.nd2	7.96	7.82	1.5	0	0	0			0.188442	0.189576	10.8619
67	e13WT3_dapi_khg_mtmg_between_003.nd2	11.71	11.71	0	0	0	0			0	0	0
68	e13WT3_dapi_khg_mtmg_between_003.nd2	8.98	8.97	0.5	0	0	0			0.0556793	0.0557081	3.19184
69	e13WT3_dapi_khg_mtmg_between_003.nd2	10.8	10.76	1	0	0	0			0.0925926	0.0927254	5.31277
70	e13WT3_dapi_khg_mtmg_between_003.nd2	7.26	5.7	4.5	0	0	0			0.619835	0.668532	38.3041
71	e13WT3_dapi_khg_mtmg_between_003.nd2	7.72	3.25	7	0	0	0			0.906736	1.13548	65.0581
72	e13WT3_dapi_khg_mtmg_between_003.nd2	11.51	11.23	2.5	0	0	0			0.217202	0.218948	12.5448
73	e13WT3_dapi_khg_mtmg_between_003.nd2	11.63	11.23	3	0	0	0			0.257954	0.260903	14.9487
74	e13WT3_dapi_khg_mtmg_between_003.nd2	12.57	12.56	0.5	0	0	0			0.0397772	0.0397877	2.27967
75	e13WT3_dapi_khg_mtmg_between_003.nd2	7.24	7.24	0	0	0	0			0	0	0
76	e13WT3_dapi_khg_mtmg_between_004.nd2	9.36	9.31	1	0	0	0			0.106838	0.107042	6.13305
77	e13WT3_dapi_khg_mtmg_between_004.nd2	11.43	11.03	3	0	0	0			0.262467	0.265578	15.2165
78	e13WT3_dapi_khg_mtmg_between_005.nd2	9.35	8.67	3.5	0	0	0			0.374332	0.383676	21.983
79	e13WT3_dapi_khg_mtmg_between_005.nd2	13.06	12.26	4.5	0	0	0			0.344564	0.351774	20.1552
80	e13WT3_dapi_khg_mtmg_between_005.nd2	14.95	14.94	0.5	0	0	0			0.0334448	0.0334511	1.9166
81	e13WT3_dapi_khg_mtmg_between_006.nd2	12.45	12.35	1.5	0	0	0			0.120482	0.120775	6.91992
82	e13WT3_dapi_khg_mtmg_between_006.nd2	9.01	9.01	0	0	0	0			0	0	0
83	e13WT3_dapi_khg_mtmg_between_006.nd2	6.43	4.6	4.5	0	0	0			0.699844	0.77518	44.4145
84	e13WT3_dapi_khg_mtmg_between_006.nd2	6.83	6.76	1	0	0	0			0.146413	0.146941	8.4191
85	e13WT3_dapi_khg_mtmg_between_006.nd2	8.57	8.55	0.5	0	0	0			0.0583431	0.0583762	3.34471
86	e13WT3_dapi_khg_mtmg_between_006.nd2	11.76	11.05	4	0	0	0			0.340136	0.347062	19.8852
87	e13WT3_dapi_khg_mtmg_between_006.nd2	10.49	10.38	1.5	0	0	0			0.142993	0.143485	8.22109
88	e13WT3_dapi_khg_mtmg_between_006.nd2	11.72	11.71	0.5	0	0	0			0.0426621	0.0426751	2.4451
89	e13WT3_dapi_khg_mtmg_between_006.nd2	10.26	10.15	1.5	0	0	0			0.146199	0.146725	8.40671
90	e13WT3_dapi_khg_mtmg_between_007.nd2	9.52	8.64	4	0	0	0			0.420168	0.433631	24.8452
91	e13WT3_dapi_khg_mtmg_between_007.nd2	10.19	10.14	1	0	0	0			0.0981354	0.0982936	5.63181
92	e13WT3_dapi_khg_mtmg_between_007.nd2	10.27	9.96	2.5	0	0	0			0.243427	0.245898	14.0889
93	e13WT3_dapi_khg_mtmg_between_007.nd2	14.12	14.11	0.5	0	0	0			0.0354108	0.0354182	2.02931
94	e13WT3_dapi_khg_mtmg_between_007.nd2	12.08	11.7	3	0	0	0			0.248344	0.250971	14.3796
95	e13WT3_dapi_khg_mtmg_between_008.nd2	11.89	11.88	0.5	0	0	0			0.0420521	0.0420645	2.41012
96	e13WT3_dapi_khg_mtmg_between_008.nd2	13.38	13.04	3	0	0	0			0.224215	0.226138	12.9567
97	e13WT3_dapi_khg_mtmg_between_008.nd2	7.28	1.98	7	0	0	0			0.961538	1.29255	74.0576
98	e13WT3_dapi_khg_mtmg_between_009.nd2	8.65	8.42	2	0	0	0			0.231214	0.233325	13.3685
99	e13WT3_dapi_khg_mtmg_between_009.nd2	13.34	13.34	0	0	0	0			0	0	0
100	e13WT3_dapi_khg_mtmg_between_009.nd2	9.11	9.11	0	0	0	0			0	0	0
101	e13WT3_dapi_khg_mtmg_between_009.nd2	11.73	11.34	3	0	0	0			0.255754	0.258628	14.8183
102	e13WT3_dapi_khg_mtmg_between_009.nd2	11.92	11.65	2.5	0	0	0			0.209732	0.2113	12.1066
103	e13WT3_dapi_khg_mtmg_between_009.nd2	8.64	8.62	0.5	0	0	0			0.0578704	0.0579027	3.31758
104	e13WT3_dapi_khg_mtmg_between_009.nd2	7.06	6.6	2.5	0	0	0			0.354108	0.36196	20.7388
105	e13WT3_dapi_khg_mtmg_between_009.nd2	13.62	13.62	0	0	0	0			0	0	0
106	e13WT3_dapi_khg_mtmg_between_009.nd2	6.26	1.79	6	0	0	0			0.958466	1.28158	73.4289
107	e13WT3_dapi_khg_mtmg_between_010.nd2	14.04	13.96	1.5	0	0	0			0.106838	0.107042	6.13305
108	e13WT3_dapi_khg_mtmg_between_010.nd2	10.62	9.62	4.5	0	0	0			0.423729	0.437558	25.0702
109	e13WT3_dapi_khg_mtmg_between_010.nd2	12.14	12.13	0.5	0	0	0			0.0411862	0.0411978	2.36046
Item	Source	Length xyz	Length xy	Height	ND.T	ND.Z	ND.M	Comment		sin theta	angle_radians	angle_degrees
1	e13WT_dapi_khg_mtmg_midline_001.nd2	8.03	7.78	2	0	0	0			0.249066	0.251716	1.10968
3	e13WT_dapi_khg_mtmg_midline_001.nd2	12.47	12.21	2.5	0	0	0			0.200481	0.201849	2.07954
5	e13WT_dapi_khg_mtmg_midline_001.nd2	9.68	9.35	2.5	0	0	0			0.258264	0.261225	2.5809
7	e13WT_dapi_khg_mtmg_midline_001.nd2	12.59	12.59	0	0	0	0			0	0	0
8	e13WT_dapi_khg_mtmg_midline_002.nd2	12.76	12.75	0.5	0	0	0			0.039185	0.039195	2.24571
9	e13WT1_dapi_khg_mtmg_midline_003.nd2	17	17	0	0	0	0			0	0	0
10	e13WT1_dapi_khg_mtmg_midline_004.nd2	10.57	10.57	0	0	0	0			0	0	0
11	e13WT1_dapi_khg_mtmg_midline_004.nd2	16.62	16.62	0.5	0	0	0			0.0300842	0.0300888	1.72396
12	e13WT1_dapi_khg_mtmg_midline_005.nd2	10.96	10.78	2	0	0	0			0.182482	0.18351	10.5143
13	e13WT1_dapi_khg_mtmg_midline_005.nd2	8.4	8.4	0	0	0	0			0	0	0
14	e13WT1_dapi_khg_mtmg_midline_006.nd2	12.82	12.46	3	0	0	0			0.234009	0.2362	13.5332
15	e13WT1_dapi_khg_mtmg_midline_006.nd2	8.41	8.41	0	0	0	0			0	0	0
16	e13WT1_dapi_khg_mtmg_midline_006.nd2	9.02	5.69	7	0	0	0			0.776053	0.888383	50.9006
17	e13WT1_dapi_khg_mtmg_midline_007.nd2	15.95	15.94	0.5	0	0	0			0.031348	0.0313531	1.7964
18	e13WT1_dapi_khg_mtmg_midline_008.nd2	9.09	6.83	6	0	0	0			0.660066	0.720907	41.3049
19	e13WT1_dapi_khg_mtmg_midline_009.nd2	11.75	10.64	5	0	0	0			0.425532	0.43955	0.0978731
21	e13WT1_dapi_khg_mtmg_midline_009.nd2	12.72	12.68	1	0	0	0			0.0786164	0.0786976	4.50904
22	e13WT1_dapi_khg_mtmg_midline_009.nd2	13.96	13.37	4	0	0	0			0.286533	0.290606	6.47415
24	e13WT1_dapi_khg_mtmg_midline_009.nd2	14.81	14.74	1.5	0	0	0			0.101283	0.101457	1.10108
26	e13WT1_dapi_khg_mtmg_midline_010.nd2	11.8	10.91	4.5	0	0	0			0.381356	0.391263	22.4177
27	e13WT1_dapi_khg_mtmg_midline_010.nd2	15.44	15.44	0	0	0	0			0	0	0
28	e13WT1_dapi_khg_mtmg_midline_010.nd2	11.92	11.92	0	0	0	0			0	0	0
29	e13WT2_dapi_khg_mtmg_midline_001.nd2	5.85	5.85	0	0	0	0			0	0	0
30	e13WT2_dapi_khg_mtmg_midline_002.nd2	10.78	10.77	0.5	0	0	0			0.0463822	0.0463988	2.65846
31	e13WT2_dapi_khg_mtmg_midline_003.nd2	17.28	17.28	0.5	0	0	0			0.0289352	0.0289392	1.6581
32	e13WT2_dapi_khg_mtmg_midline_006.nd2	13.46	13.46	0	0	0	0			0	0	0
33	e13WT2_dapi_khg_mtmg_midline_006.nd2	9.59	9.54	1	0	0	0			0.104275	0.104465	5.98541
34	e13WT2_dapi_khg_mtmg_midline_007.nd2	8.02	8	0.5	0	0	0			0.0623441	0.0623846	3.57437
35	e13WT2_dapi_khg_mtmg_midline_007.nd2	14.27	14.27	0	0	0	0			0	0	0
36	e13WT2_dapi_khg_mtmg_midline_009.nd2	11.24	10.96	2.5	0	0	0			0.22242	0.224296	12.8512
37	e13WT2_dapi_khg_mtmg_midline_009.nd2	13.94	13.93	0.5	0	0	0			0.035868	0.0358757	2.05553
38	e13WT2_dapi_khg_mtmg_midline_009.nd2	14.85	14.54	3	0	0	0			0.20202	0.20342	3.01923
40	e13WT2_dapi_khg_mtmg_midline_009.nd2	10.61	10.42	2	0	0	0			0.188501	0.189636	10.8653
41	e13WT2_dapi_khg_mtmg_midline_010.nd2	5.94	5.59	2	0	0	0			0.3367	0.34341	6.3634
43	e13WT2_dapi_khg_mtmg_midline_010.nd2	12.79	12.75	1	0	0	0			0.0781861	0.078266	4.48431
44	e13WT2_dapi_khg_mtmg_midline_010.nd2	11.27	11.23	1	0	0	0			0.0887311	0.088848	5.09061
45	e13WT3_dapi_khg_mtmg_midline_002.nd2	10.02	9.97	1	0	0	0			0.0998004	0.0999668	5.72768
46	e13WT3_dapi_khg_mtmg_midline_002.nd2	14.28	14.25	1	0	0	0			0.070028	0.0700854	4.0156
47	e13WT3_dapi_khg_mtmg_midline_003.nd2	11.63	11.63	0	0	0	0			0	0	0
48	e13WT3_dapi_khg_mtmg_midline_004.nd2	10.99	10.7	2.5	0	0	0			0.22748	0.229489	1.873
50	e13WT3_dapi_khg_mtmg_midline_004.nd2	8.79	8.74	1	0	0	0			0.113766	0.114012	6.53243
51	e13WT3_dapi_khg_mtmg_midline_004.nd2	10.91	10.86	1	0	0	0			0.091659	0.0917879	5.25906
52	e13WT3_dapi_khg_mtmg_midline_004.nd2	8.83	8.78	1	0	0	0			0.11325	0.113494	6.50271
53	e13WT3_dapi_khg_mtmg_midline_005.nd2	11.89	11.85	1	0	0	0			0.0841043	0.0842038	4.82452
54	e13WT3_dapi_khg_mtmg_midline_005.nd2	11.75	11.05	4	0	0	0			0.340426	0.347369	3.14799
56	e13WT3_dapi_khg_mtmg_midline_006.nd2	13.71	13.67	1	0	0	0			0.0729395	0.0730043	4.18284
57	e13WT3_dapi_khg_mtmg_midline_008.nd2	11.97	11.96	0.5	0	0	0			0.0417711	0.0417833	2.394
58	e13WT3_dapi_khg_mtmg_midline_008.nd2	10.07	10.07	0	0	0	0			0	0	0
59	e13WT3_dapi_khg_mtmg_midline_009.nd2	12.45	12.44	0.5	0	0	0			0.0401606	0.0401714	2.30165
60	e13WT3_dapi_khg_mtmg_midline_009.nd2	17.78	17.72	1.5	0	0	0			0.0843645	0.0844649	4.83948

## Sheet: Lp
Item	Source	Length [µm] xyz	Length [µm] xy	Height [µm]	ND.T	ND.Z	ND.M	Comment		sin theta	angle_radians	angle_degrees
1	E13TmLpFlank_dapi_khg_mtmg_fz6_001.nd2	11.7	10.58	5	0	0	0			0.42735	0.44156	25.2995
2	E13TmLpFlank_dapi_khg_mtmg_fz6_001.nd2	8.35	5.24	6.5	0	0	0			0.778443	0.892182	51.1182
3	E13TmLpFlank_dapi_khg_mtmg_fz6_001.nd2	8.44	6.8	5	0	0	0			0.592417	0.634056	36.3287
4	E13TmLpFlank_dapi_khg_mtmg_fz6_001.nd2	7.53	5.63	5	0	0	0			0.664011	0.72617	41.6065
5	E13TmLpFlank_dapi_khg_mtmg_fz6_002.nd2	7	4.34	5.5	0	0	0			0.785714	0.90385	51.7868
6	E13TmLpFlank_dapi_khg_mtmg_fz6_002.nd2	7.75	4.22	6.5	0	0	0			0.83871	0.994909	57.0041
7	E13TmLpFlank_dapi_khg_mtmg_fz6_002.nd2	8.51	8.14	2.5	0	0	0			0.293772	0.298171	17.0839
8	E13TmLpFlank_dapi_khg_mtmg_fz6_002.nd2	8.59	7.31	4.5	0	0	0			0.523865	0.551382	31.5919
9	E13TmLpFlank_dapi_khg_mtmg_fz6_003.nd2	9	7.49	5	0	0	0			0.555556	0.589031	33.749
10	E13TmLpFlank_dapi_khg_mtmg_fz6_003.nd2	7.37	6.73	3	0	0	0			0.407056	0.419228	24.02
11	E13TmLpFlank_dapi_khg_mtmg_fz6_003.nd2	7.91	6.83	4	0	0	0			0.505689	0.53018	30.3771
12	E13TmLpFlank_dapi_khg_mtmg_fz6_004.nd2	6.32	4.44	4.5	0	0	0			0.712025	0.792378	45.3999
13	E13TmLpFlank_dapi_khg_mtmg_fz6_004.nd2	6.94	6.47	2.5	0	0	0			0.360231	0.368515	21.1144
14	E13TmLpFlank_dapi_khg_mtmg_fz6_004.nd2	11.5	11.49	0.5	0	0	0			0.0434783	0.043492	2.49191
15	E13TmLpFlank_dapi_khg_mtmg_fz6_005.nd2	7.64	7.64	0	0	0	0			0	0	0
16	E13TmLpFlank_dapi_khg_mtmg_fz6_006.nd2	11.05	10.86	2	0	0	0			0.180995	0.181999	10.4277
17	E13TmLpFlank_dapi_khg_mtmg_fz6_006.nd2	5.71	5.13	2.5	0	0	0			0.437828	0.453182	25.9654
18	E13TmLpFlank_dapi_khg_mtmg_fz6_006.nd2	8.28	7.25	4	0	0	0			0.483092	0.504182	28.8875
19	E13TmLpFlank_dapi_khg_mtmg_fz6_007.nd2	12.39	12.38	0.5	0	0	0			0.0403551	0.0403661	2.31281
20	E13TmLpFlank_dapi_khg_mtmg_fz6_007.nd2	9.16	8.81	2.5	0	0	0			0.272926	0.276433	15.8384
21	E13TmLpFlank_dapi_khg_mtmg_fz6_008.nd2	7.36	6.17	4	0	0	0			0.543478	0.574575	32.9207
22	E13TmLpFlank_dapi_khg_mtmg_fz6_008.nd2	9.04	8.69	2.5	0	0	0			0.276549	0.280201	16.0543
23	E13TmLpFlank_dapi_khg_mtmg_fz6_008.nd2	11.86	11.85	0.5	0	0	0			0.0421585	0.042171	2.41622
24	E13TmLpFlank_dapi_khg_mtmg_fz6_009.nd2	11.65	11.38	2.5	0	0	0			0.214592	0.216274	12.3916
25	E13TmLpFlank_dapi_khg_mtmg_fz6_009.nd2	7.49	6.34	4	0	0	0			0.534045	0.563378	32.2792
26	E13TmLpFlank_dapi_khg_mtmg_fz6_009.nd2	6.29	4.39	4.5	0	0	0			0.715421	0.797227	45.6777
27	E13TmLpFlank_dapi_khg_mtmg_fz6_009.nd2	5.57	3.29	4.5	0	0	0			0.807899	0.940579	53.8912
28	E13TmLpFlank_dapi_khg_mtmg_fz6_010.nd2	12.58	12.08	3.5	0	0	0			0.278219	0.28194	16.154
29	E13TmLpFlank_dapi_khg_mtmg_fz6_011.nd2	10.24	8.94	5	0	0	0			0.488281	0.510119	29.2277
30	E13TmLpFlank_dapi_khg_mtmg_fz6_011.nd2	14.45	14.37	1.5	0	0	0			0.103806	0.103994	5.95839
31	E13TmLpFlank_dapi_khg_mtmg_fz6_011.nd2	12.58	12.57	0.5	0	0	0			0.0397456	0.0397561	2.27786
32	E13TmLpFlank_dapi_khg_mtmg_fz6_012.nd2	6.49	2.49	6	0	0	0			0.924499	1.17972	67.593
33	E13TmLpFlank_dapi_khg_mtmg_fz6_012.nd2	6.27	4.83	4	0	0	0			0.637959	0.691844	39.6398
34	E13TmLpFlank_dapi_khg_mtmg_fz6_012.nd2	9.55	9.43	1.5	0	0	0			0.157068	0.157721	9.03676
35	E13TmLpFlank_dapi_khg_mtmg_fz6_013.nd2	6.11	5.01	3.5	0	0	0			0.572831	0.609956	34.9479
36	E13TmLpFlank_dapi_khg_mtmg_fz6_014.nd2	9.71	8.85	4	0	0	0			0.411946	0.424589	24.3272
37	E13TmLpFlank_dapi_khg_mtmg_fz6_014.nd2	14.46	14.42	1	0	0	0			0.0691563	0.0692115	3.96553
38	E13TmLpFlank_dapi_khg_mtmg_fz6_014.nd2	6.74	3.07	6	0	0	0			0.890208	1.0978	62.8994
39	E13TmLpFlank_dapi_khg_mtmg_fz6_015.nd2	11.97	11.96	0.5	0	0	0			0.0417711	0.0417833	2.394
40	E13TmLpFlank_dapi_khg_mtmg_fz6_015.nd2	6.95	5.29	4.5	0	0	0			0.647482	0.704276	40.352
41	E13TmLpFlank_dapi_khg_mtmg_fz6_015.nd2	8.46	8.45	0.5	0	0	0			0.0591017	0.0591361	3.38825
42	E13TmLpFlank_dapi_khg_mtmg_fz6_015.nd2	9.33	9.11	2	0	0	0			0.214362	0.216039	12.3781
1	E13V2TmFlank_dapi_khg_mtmg_fz6_001.nd2	8.64	8.51	1.5	0	0	0			0.173611	0.174495	9.99784
2	E13V2TmFlank_dapi_khg_mtmg_fz6_001.nd2	9.25	4.65	8	0	0	0			0.864865	1.04488	59.8673
3	E13V2TmFlank_dapi_khg_mtmg_fz6_002.nd2	10.82	10.77	1	0	0	0			0.0924214	0.0925535	5.30293
4	E13V2TmFlank_dapi_khg_mtmg_fz6_002.nd2	8.18	6.83	4.5	0	0	0			0.550122	0.582511	33.3754
5	E13V2TmFlank_dapi_khg_mtmg_fz6_002.nd2	8.25	8.24	0.5	0	0	0			0.0606061	0.0606432	3.4746
6	E13V2TmFlank_dapi_khg_mtmg_fz6_002.nd2	5.78	5.76	0.5	0	0	0			0.0865052	0.0866134	4.96258
7	E13V2TmFlank_dapi_khg_mtmg_fz6_002.nd2	6.53	5.16	4	0	0	0			0.612557	0.659292	37.7747
8	E13V2TmFlank_dapi_khg_mtmg_fz6_003.nd2	8.87	4.74	7.5	0	0	0			0.845547	1.00759	57.7306
9	E13V2TmFlank_dapi_khg_mtmg_fz6_003.nd2	8.47	8.47	0	0	0	0			0	0	0
10	E13V2TmFlank_dapi_khg_mtmg_fz6_003.nd2	4	0	4	0	0	0			1	1.5708	90
11	E13V2TmFlank_dapi_khg_mtmg_fz6_003.nd2	6.15	5.96	1.5	0	0	0			0.243902	0.246388	14.117
12	E13V2TmFlank_dapi_khg_mtmg_fz6_003.nd2	10.16	9.54	3.5	0	0	0			0.344488	0.351694	20.1506
13	E13V2TmFlank_dapi_khg_mtmg_fz6_004.nd2	9.84	9.38	3	0	0	0			0.304878	0.30981	17.7508
14	E13V2TmFlank_dapi_khg_mtmg_fz6_004.nd2	9.61	8.2	5	0	0	0			0.520291	0.547192	31.3518
15	E13V2TmFlank_dapi_khg_mtmg_fz6_004.nd2	6.59	5.58	3.5	0	0	0			0.531108	0.559907	32.0803
16	E13V2TmFlank_dapi_khg_mtmg_fz6_004.nd2	6.92	6.76	1.5	0	0	0			0.216763	0.218497	12.519
17	E13V2TmFlank_dapi_khg_mtmg_fz6_004.nd2	12.89	12.8	1.5	0	0	0			0.116369	0.116634	6.68261
18	E13V2TmFlank_dapi_khg_mtmg_fz6_005.nd2	12.84	12.8	1	0	0	0			0.0778816	0.0779606	4.46681
19	E13V2TmFlank_dapi_khg_mtmg_fz6_005.nd2	8.81	8.68	1.5	0	0	0			0.170261	0.171095	9.803
20	E13V2TmFlank_dapi_khg_mtmg_fz6_005.nd2	11.42	11.38	1	0	0	0			0.0875657	0.087678	5.02358
21	E13V2TmFlank_dapi_khg_mtmg_fz6_006.nd2	8.73	8.6	1.5	0	0	0			0.171821	0.172678	9.89373
22	E13V2TmFlank_dapi_khg_mtmg_fz6_006.nd2	7.51	7.36	1.5	0	0	0			0.199734	0.201086	11.5214
23	E13V2TmFlank_dapi_khg_mtmg_fz6_007.nd2	11.32	11.22	1.5	0	0	0			0.132509	0.1329	7.61459
24	E13V2TmFlank_dapi_khg_mtmg_fz6_007.nd2	12.02	12.02	0	0	0	0			0	0	0
25	E13V2TmFlank_dapi_khg_mtmg_fz6_008.nd2	7.39	5.86	4.5	0	0	0			0.608931	0.654712	37.5122
26	E13V2TmFlank_dapi_khg_mtmg_fz6_008.nd2	6.88	6.86	0.5	0	0	0			0.0726744	0.0727385	4.16761
27	E13V2TmFlank_dapi_khg_mtmg_fz6_008.nd2	10.57	10.47	1.5	0	0	0			0.141911	0.142392	8.15845
28	E13V2TmFlank_dapi_khg_mtmg_fz6_009.nd2	8.53	5.52	6.5	0	0	0			0.762016	0.866421	49.6423
29	E13V2TmFlank_dapi_khg_mtmg_fz6_009.nd2	6.92	6.92	0	0	0	0			0	0	0
30	E13V2TmFlank_dapi_khg_mtmg_fz6_009.nd2	11.04	9.85	5	0	0	0			0.452899	0.470014	26.9298
31	E13V2TmFlank_dapi_khg_mtmg_fz6_010.nd2	8.45	8.07	2.5	0	0	0			0.295858	0.300354	17.209
32	E13V2TmFlank_dapi_khg_mtmg_fz6_011.nd2	9.15	6.9	6	0	0	0			0.655738	0.715159	40.9756
33	E13V2TmFlank_dapi_khg_mtmg_fz6_011.nd2	8.86	8.34	3	0	0	0			0.3386	0.345429	19.7916
34	E13V2TmFlank_dapi_khg_mtmg_fz6_012.nd2	8.85	8.33	3	0	0	0			0.338983	0.345836	19.8149
35	E13V2TmFlank_dapi_khg_mtmg_fz6_012.nd2	11.46	9.77	6	0	0	0			0.52356	0.551024	31.5714
36	E13V2TmFlank_dapi_khg_mtmg_fz6_012.nd2	7.94	3.75	7	0	0	0			0.881612	1.07927	61.8374
37	E13V2TmFlank_dapi_khg_mtmg_fz6_012.nd2	8.65	7.67	4	0	0	0			0.462428	0.480731	27.5439
38	E13V2TmFlank_dapi_khg_mtmg_fz6_013.nd2	12.96	12.87	1.5	0	0	0			0.115741	0.116001	6.64635
39	E13V2TmFlank_dapi_khg_mtmg_fz6_013.nd2	8.79	6.86	5.5	0	0	0			0.625711	0.676043	38.7344
40	E13V2TmFlank_dapi_khg_mtmg_fz6_013.nd2	15.33	15.3	1	0	0	0			0.0652316	0.0652779	3.74015
41	E13V2TmFlank_dapi_khg_mtmg_fz6_013.nd2	13.26	13.26	0	0	0	0			0	0	0
42	E13V2TmFlank_dapi_khg_mtmg_fz6_014.nd2	13.02	12.54	3.5	0	0	0			0.268817	0.272165	15.5939
43	E13V2TmFlank_dapi_khg_mtmg_fz6_014.nd2	8	7.86	1.5	0	0	0			0.1875	0.188616	10.8069
44	E13V2TmFlank_dapi_khg_mtmg_fz6_014.nd2	8.05	5.36	6	0	0	0			0.745342	0.841047	48.1884
45	E13V2TmFlank_dapi_khg_mtmg_fz6_015.nd2	10.83	10.83	0	0	0	0			0	0	0
Item	Source	Length [µm] xyz	Length [µm] xy	Height [µm]	ND.T	ND.Z	ND.M	Comment		sin theta	angle_radians	angle_degrees
1	E13TmLpIntermed_dapi_khg_mtmg_fz6_001.nd2	13.49	12.53	5	0	0	0			0.370645	0.379703	21.7554
2	E13TmLpIntermed_dapi_khg_mtmg_fz6_001.nd2	11.71	11.44	2.5	0	0	0			0.213493	0.215149	12.3271
3	E13TmLpIntermed_dapi_khg_mtmg_fz6_001.nd2	8.37	8.13	2	0	0	0			0.238949	0.241283	13.8245
4	E13TmLpIntermed_dapi_khg_mtmg_fz6_001.nd2	5.25	5.25	0	0	0	0			0	0	0
5	E13TmLpIntermed_dapi_khg_mtmg_fz6_002.nd2	12.26	11.59	4	0	0	0			0.326264	0.332349	19.0422
6	E13TmLpIntermed_dapi_khg_mtmg_fz6_002.nd2	7.5	5.58	5	0	0	0			0.666667	0.729728	41.8103
7	E13TmLpIntermed_dapi_khg_mtmg_fz6_002.nd2	11.92	11.39	3.5	0	0	0			0.293624	0.298016	17.0751
8	E13TmLpIntermed_dapi_khg_mtmg_fz6_002.nd2	12.18	11.81	3	0	0	0			0.246305	0.248866	14.259
9	E13TmLpIntermed_dapi_khg_mtmg_fz6_002.nd2	13.53	13.53	0	0	0	0			0	0	0
10	E13TmLpIntermed_dapi_khg_mtmg_fz6_003.nd2	8.51	8.14	2.5	0	0	0			0.293772	0.298171	17.0839
11	E13TmLpIntermed_dapi_khg_mtmg_fz6_003.nd2	9.58	9.24	2.5	0	0	0			0.26096	0.264017	15.1271
12	E13TmLpIntermed_dapi_khg_mtmg_fz6_004.nd2	10.29	10.24	1	0	0	0			0.0971817	0.0973354	5.5769
13	E13TmLpIntermed_dapi_khg_mtmg_fz6_004.nd2	12.53	11.88	4	0	0	0			0.319234	0.324921	18.6166
14	E13TmLpIntermed_dapi_khg_mtmg_fz6_004.nd2	10.67	10.24	3	0	0	0			0.281162	0.285005	16.3296
15	E13TmLpIntermed_dapi_khg_mtmg_fz6_004.nd2	10.69	10.64	1	0	0	0			0.0935454	0.0936823	5.3676
16	E13TmLpIntermed_dapi_khg_mtmg_fz6_005.nd2	10.99	8.47	7	0	0	0			0.636943	0.690526	39.5642
17	E13TmLpIntermed_dapi_khg_mtmg_fz6_005.nd2	9.45	2.88	9	0	0	0			0.952381	1.26095	72.2472
18	E13TmLpIntermed_dapi_khg_mtmg_fz6_005.nd2	7.87	7.81	1	0	0	0			0.127065	0.127409	7.30001
19	E13TmLpIntermed_dapi_khg_mtmg_fz6_005.nd2	11.98	11.29	4	0	0	0			0.33389	0.340427	19.505
20	E13TmLpIntermed_dapi_khg_mtmg_fz6_005.nd2	12.05	9.43	7.5	0	0	0			0.622407	0.671814	38.4921
21	E13TmLpIntermed_dapi_khg_mtmg_fz6_006.nd2	10.25	8.65	5.5	0	0	0			0.536585	0.566385	32.4515
22	E13TmLpIntermed_dapi_khg_mtmg_fz6_006.nd2	10.09	10.08	0.5	0	0	0			0.049554	0.0495743	2.8404
23	E13TmLpIntermed_dapi_khg_mtmg_fz6_006.nd2	11.88	11.35	3.5	0	0	0			0.294613	0.29905	17.1343
24	E13TmLpIntermed_dapi_khg_mtmg_fz6_007.nd2	11.58	11.49	1.5	0	0	0			0.129534	0.129899	7.44265
25	E13TmLpIntermed_dapi_khg_mtmg_fz6_007.nd2	6.9	6.9	0	0	0	0			0	0	0
26	E13TmLpIntermed_dapi_khg_mtmg_fz6_007.nd2	11.58	10.87	4	0	0	0			0.345423	0.35269	20.2076
27	E13TmLpIntermed_dapi_khg_mtmg_fz6_007.nd2	12.46	9.95	7.5	0	0	0			0.601926	0.645911	37.008
28	E13TmLpIntermed_dapi_khg_mtmg_fz6_008.nd2	10.38	9.1	5	0	0	0			0.481696	0.502589	28.7962
29	E13TmLpIntermed_dapi_khg_mtmg_fz6_008.nd2	6.78	3.96	5.5	0	0	0			0.811209	0.946217	54.2143
30	E13TmLpIntermed_dapi_khg_mtmg_fz6_008.nd2	12.68	11.85	4.5	0	0	0			0.35489	0.362796	20.7867
31	E13TmLpIntermed_dapi_khg_mtmg_fz6_008.nd2	9.13	8.78	2.5	0	0	0			0.273823	0.277365	15.8919
32	E13TmLpIntermed_dapi_khg_mtmg_fz6_008.nd2	8.95	8.9	1	0	0	0			0.111732	0.111966	6.41516
33	E13TmLpIntermed_dapi_khg_mtmg_fz6_009.nd2	8.1	4.83	6.5	0	0	0			0.802469	0.931422	53.3665
34	E13TmLpIntermed_dapi_khg_mtmg_fz6_009.nd2	10.97	10.96	0.5	0	0	0			0.0455789	0.0455946	2.61238
35	E13TmLpIntermed_dapi_khg_mtmg_fz6_009.nd2	11.59	9.92	6	0	0	0			0.517688	0.544146	31.1773
36	E13TmLpIntermed_dapi_khg_mtmg_fz6_009.nd2	10.82	10.05	4	0	0	0			0.369686	0.378671	21.6962
37	E13TmLpIntermed_dapi_khg_mtmg_fz6_009.nd2	10.98	8.46	7	0	0	0			0.637523	0.691279	39.6073
38	E13TmLpIntermed_dapi_khg_mtmg_fz6_009.nd2	15.64	15.6	1	0	0	0			0.0639386	0.0639823	3.66591
39	E13TmLpIntermed_dapi_khg_mtmg_fz6_010.nd2	6.01	0.32	6	0	0	0			0.998336	1.5131	86.6943
40	E13TmLpIntermed_dapi_khg_mtmg_fz6_010.nd2	11.65	11.64	0.5	0	0	0			0.0429185	0.0429316	2.4598
41	E13TmLpIntermed_dapi_khg_mtmg_fz6_011.nd2	15.96	15.95	0.5	0	0	0			0.0313283	0.0313334	1.79527
42	E13TmLpIntermed_dapi_khg_mtmg_fz6_011.nd2	11.55	11.54	0.5	0	0	0			0.04329	0.0433036	2.48111
43	E13TmLpIntermed_dapi_khg_mtmg_fz6_011.nd2	8.38	7.62	3.5	0	0	0			0.417661	0.43087	24.687
44	E13TmLpIntermed_dapi_khg_mtmg_fz6_012.nd2	15.06	15.06	0	0	0	0			0	0	0
45	E13TmLpIntermed_dapi_khg_mtmg_fz6_012.nd2	10.89	10.89	0	0	0	0			0	0	0
46	E13TmLpIntermed_dapi_khg_mtmg_fz6_012.nd2	6.77	3.13	6	0	0	0			0.886263	1.08921	62.4073
47	E13TmLpIntermed_dapi_khg_mtmg_fz6_013.nd2	9.31	9.31	0	0	0	0			0	0	0
48	E13TmLpIntermed_dapi_khg_mtmg_fz6_013.nd2	5.35	5.32	0.5	0	0	0			0.0934579	0.0935945	5.36257
49	E13TmLpIntermed_dapi_khg_mtmg_fz6_014.nd2	8.52	8.14	2.5	0	0	0			0.293427	0.29781	17.0633
50	E13TmLpIntermed_dapi_khg_mtmg_fz6_014.nd2	10.3	10.11	2	0	0	0			0.194175	0.195416	11.1965
51	E13TmLpIntermed_dapi_khg_mtmg_fz6_014.nd2	10.21	10.16	1	0	0	0			0.0979432	0.0981005	5.62074
52	E13TmLpIntermed_dapi_khg_mtmg_fz6_015.nd2	10.03	8.96	4.5	0	0	0			0.448654	0.465259	26.6574
53	E13TmLpIntermed_dapi_khg_mtmg_fz6_015.nd2	11.12	11.12	0	0	0	0			0	0	0
1	E13V2TmIntermed_dapi_khg_mtmg_fz6_001.nd2	9.29	8.95	2.5	0	0	0			0.269107	0.272465	15.6111
2	E13V2TmIntermed_dapi_khg_mtmg_fz6_002.nd2	8.99	8.97	0.5	0	0	0			0.0556174	0.0556461	3.18828
3	E13V2TmIntermed_dapi_khg_mtmg_fz6_002.nd2	10.75	10.46	2.5	0	0	0			0.232558	0.234707	13.4477
4	E13V2TmIntermed_dapi_khg_mtmg_fz6_002.nd2	8.74	8.2	3	0	0	0			0.343249	0.350374	20.075
5	E13V2TmIntermed_dapi_khg_mtmg_fz6_002.nd2	9.4	9.34	1	0	0	0			0.106383	0.106585	6.10685
6	E13V2TmIntermed_dapi_khg_mtmg_fz6_002.nd2	8.26	7.48	3.5	0	0	0			0.423729	0.437558	25.0702
7	E13V2TmIntermed_dapi_khg_mtmg_fz6_002.nd2	9.12	9.11	0.5	0	0	0			0.0548246	0.0548521	3.14279
8	E13V2TmIntermed_dapi_khg_mtmg_fz6_002.nd2	10.69	9.91	4	0	0	0			0.374181	0.383514	21.9737
9	E13V2TmIntermed_dapi_khg_mtmg_fz6_002.nd2	7.99	6.92	4	0	0	0			0.500626	0.524322	30.0414
10	E13V2TmIntermed_dapi_khg_mtmg_fz6_003.nd2	7.7	5.85	5	0	0	0			0.649351	0.70673	40.4927
11	E13V2TmIntermed_dapi_khg_mtmg_fz6_003.nd2	8.57	6.57	5.5	0	0	0			0.641774	0.696809	39.9242
12	E13V2TmIntermed_dapi_khg_mtmg_fz6_003.nd2	14.06	13.74	3	0	0	0			0.213371	0.215024	12.32
13	E13V2TmIntermed_dapi_khg_mtmg_fz6_004.nd2	9.46	8.97	3	0	0	0			0.317125	0.322696	18.4891
14	E13V2TmIntermed_dapi_khg_mtmg_fz6_004.nd2	8.93	8.81	1.5	0	0	0			0.167973	0.168773	9.66999
15	E13V2TmIntermed_dapi_khg_mtmg_fz6_004.nd2	9.32	9.26	1	0	0	0			0.107296	0.107503	6.15947
16	E13V2TmIntermed_dapi_khg_mtmg_fz6_004.nd2	9.56	7.81	5.5	0	0	0			0.575314	0.612988	35.1216
17	E13V2TmIntermed_dapi_khg_mtmg_fz6_004.nd2	7.72	6.6	4	0	0	0			0.518135	0.544669	31.2072
18	E13V2TmIntermed_dapi_khg_mtmg_fz6_005.nd2	10.93	10.93	0	0	0	0			0	0	0
19	E13V2TmIntermed_dapi_khg_mtmg_fz6_005.nd2	8.82	8.59	2	0	0	0			0.226757	0.228747	13.1062
20	E13V2TmIntermed_dapi_khg_mtmg_fz6_005.nd2	8.89	8.37	3	0	0	0			0.337458	0.344215	19.7221
21	E13V2TmIntermed_dapi_khg_mtmg_fz6_006.nd2	11.52	10.8	4	0	0	0			0.347222	0.354607	20.3175
22	E13V2TmIntermed_dapi_khg_mtmg_fz6_006.nd2	6.6	5.59	3.5	0	0	0			0.530303	0.558958	32.0259
23	E13V2TmIntermed_dapi_khg_mtmg_fz6_007.nd2	7.48	5.56	5	0	0	0			0.668449	0.732122	41.9475
24	E13V2TmIntermed_dapi_khg_mtmg_fz6_008.nd2	9.52	8.64	4	0	0	0			0.420168	0.433631	24.8452
25	E13V2TmIntermed_dapi_khg_mtmg_fz6_008.nd2	9.08	6.34	6.5	0	0	0			0.715859	0.797854	45.7136
26	E13V2TmIntermed_dapi_khg_mtmg_fz6_009.nd2	9.76	9.44	2.5	0	0	0			0.256148	0.259035	14.8416
27	E13V2TmIntermed_dapi_khg_mtmg_fz6_009.nd2	7.5	6.63	3.5	0	0	0			0.466667	0.485518	27.8181
28	E13V2TmIntermed_dapi_khg_mtmg_fz6_009.nd2	10.39	9.11	5	0	0	0			0.481232	0.50206	28.7659
29	E13V2TmIntermed_dapi_khg_mtmg_fz6_009.nd2	11.93	11.92	0.5	0	0	0			0.0419111	0.0419234	2.40204
30	E13V2TmIntermed_dapi_khg_mtmg_fz6_010.nd2	8.09	4.06	7	0	0	0			0.865266	1.04568	59.9131
31	E13V2TmIntermed_dapi_khg_mtmg_fz6_010.nd2	12.39	12.02	3	0	0	0			0.242131	0.244561	14.0123
32	E13V2TmIntermed_dapi_khg_mtmg_fz6_010.nd2	7.49	7.49	0	0	0	0			0	0	0
33	E13V2TmIntermed_dapi_khg_mtmg_fz6_010.nd2	9.03	9.01	0.5	0	0	0			0.055371	0.0553993	3.17415
34	E13V2TmIntermed_dapi_khg_mtmg_fz6_010.nd2	9.21	9.15	1	0	0	0			0.108578	0.108792	6.23333
35	E13V2TmIntermed_dapi_khg_mtmg_fz6_010.nd2	8.37	8.36	0.5	0	0	0			0.0597372	0.0597727	3.42473
36	E13V2TmIntermed_dapi_khg_mtmg_fz6_010.nd2	9.29	7.49	5.5	0	0	0			0.592034	0.633581	36.3015
37	E13V2TmIntermed_dapi_khg_mtmg_fz6_010.nd2	9.16	7.68	5	0	0	0			0.545852	0.577405	33.0829
38	E13V2TmIntermed_dapi_khg_mtmg_fz6_010.nd2	12.31	11.94	3	0	0	0			0.243704	0.246183	14.1053
39	E13V2TmIntermed_dapi_khg_mtmg_fz6_011.nd2	11.99	11.95	1	0	0	0			0.0834028	0.0834998	4.78419
40	E13V2TmIntermed_dapi_khg_mtmg_fz6_011.nd2	14.22	14	2.5	0	0	0			0.175809	0.176727	10.1257
41	E13V2TmIntermed_dapi_khg_mtmg_fz6_011.nd2	13.94	13.91	1	0	0	0			0.071736	0.0717977	4.1137
42	E13V2TmIntermed_dapi_khg_mtmg_fz6_012.nd2	9.5	8.37	4.5	0	0	0			0.473684	0.493469	28.2737
43	E13V2TmIntermed_dapi_khg_mtmg_fz6_012.nd2	7.66	1.54	7.5	0	0	0			0.979112	1.36605	78.2688
44	E13V2TmIntermed_dapi_khg_mtmg_fz6_012.nd2	12.65	12.56	1.5	0	0	0			0.118577	0.118857	6.80999
45	E13V2TmIntermed_dapi_khg_mtmg_fz6_012.nd2	6.8	4.6	5	0	0	0			0.735294	0.826101	47.3321
46	E13V2TmIntermed_dapi_khg_mtmg_fz6_012.nd2	8.51	8.27	2	0	0	0			0.235018	0.237237	13.5927
47	E13V2TmIntermed_dapi_khg_mtmg_fz6_013.nd2	9.29	8.13	4.5	0	0	0			0.484392	0.505668	28.9726
48	E13V2TmIntermed_dapi_khg_mtmg_fz6_013.nd2	9.88	9.23	3.5	0	0	0			0.354251	0.362113	20.7475
49	E13V2TmIntermed_dapi_khg_mtmg_fz6_013.nd2	8.36	7.34	4	0	0	0			0.478469	0.49891	28.5855
50	E13V2TmIntermed_dapi_khg_mtmg_fz6_014.nd2	7.52	7.52	0	0	0	0			0	0	0
51	E13V2TmIntermed_dapi_khg_mtmg_fz6_014.nd2	8.13	5.48	6	0	0	0			0.738007	0.830113	47.562
52	E13V2TmIntermed_dapi_khg_mtmg_fz6_015.nd2	7.88	7.82	1	0	0	0			0.126904	0.127247	7.2907
53	E13V2TmIntermed_dapi_khg_mtmg_fz6_015.nd2	8.01	7.99	0.5	0	0	0			0.062422	0.0624626	3.57884
54	E13V2TmIntermed_dapi_khg_mtmg_fz6_015.nd2	8.31	6.99	4.5	0	0	0			0.541516	0.57224	32.7869
55	E13V2TmIntermed_dapi_khg_mtmg_fz6_015.nd2	9.65	8.78	4	0	0	0			0.414508	0.427402	24.4883
56	E13V2TmIntermed_dapi_khg_mtmg_fz6_015.nd2	9.62	9.62	0	0	0	0			0	0	0
57	E13V2TmIntermed_dapi_khg_mtmg_fz6_015.nd2	6.52	4.71	4.5	0	0	0			0.690184	0.761743	43.6447
58	E13V2TmIntermed_dapi_khg_mtmg_fz6_015.nd2	11.13	10.56	3.5	0	0	0			0.314465	0.319893	18.3285
