# Supplementary material for: Epithelial geometry regulates spindle orientation and progenitor fate during formation of the mammalian epidermis
Source: eLife journal article supplement (doi:10.7554/elife.47102), 2019-06-12
Supplement: supp [file DivisionAngles.xlsx]

## Sheet: DivisionAngles
Item	Source	Length xyz	Length xy	Height	ND.T	ND.Z	ND.M	Comment		sin theta	angle_radians	angle_degrees
1	e14control1_dapi_m21_mtmg_celsr1_001.nd2	7.34	6.45	3.5	0	0	0			0.476839	0.497055	28.4792
2	e14control1_dapi_m21_mtmg_celsr1_001.nd2	9.25	9.2	1	0	0	0			0.108108	0.10832	6.20627
3	e14control1_dapi_m21_mtmg_celsr1_002.nd2	6.04	2.49	5.5	0	0	0			0.910596	1.14472	65.5878
4	e14control1_dapi_m21_mtmg_celsr1_002.nd2	6.96	6.94	0.5	0	0	0			0.0718391	0.071901	4.11962
5	e14control1_dapi_m21_mtmg_celsr1_002.nd2	7.98	7.97	0.5	0	0	0			0.0626566	0.0626977	3.59231
6	e14control1_dapi_m21_mtmg_celsr1_002.nd2	8.26	8.2	1	0	0	0			0.121065	0.121363	6.95359
7	e14control1_dapi_m21_mtmg_celsr1_003.nd2	9.96	9.49	3	0	0	0			0.301205	0.305956	17.53
8	e14control1_dapi_m21_mtmg_celsr1_003.nd2	9.27	9.22	1	0	0	0			0.107875	0.108085	6.19283
9	e14control1_dapi_m21_mtmg_celsr1_003.nd2	6.47	2.42	6	0	0	0			0.927357	1.18729	68.0265
10	e14control1_dapi_m21_mtmg_celsr1_003.nd2	7.42	5.48	5	0	0	0			0.673854	0.739413	42.3653
11	e14control1_dapi_m21_mtmg_celsr1_003.nd2	5.05	0.69	5	0	0	0			0.990099	1.42996	81.9307
12	e14control1_dapi_m21_mtmg_celsr1_004.nd2	9.11	9.09	0.5	0	0	0			0.0548847	0.0549123	3.14625
13	e14control1_dapi_m21_mtmg_celsr1_004.nd2	7.82	6.99	3.5	0	0	0			0.44757	0.464046	26.5879
14	e14control1_dapi_m21_mtmg_celsr1_005.nd2	8.79	8.79	0	0	0	0			0	0	0
15	e14control1_dapi_m21_mtmg_celsr1_005.nd2	6.31	6.13	1.5	0	0	0			0.237718	0.240016	13.7519
16	e14control1_dapi_m21_mtmg_celsr1_005.nd2	4	0	4	0	0	0			1	1.5708	90
17	e14control1_dapi_m21_mtmg_celsr1_006.nd2	7.99	7.84	1.5	0	0	0			0.187735	0.188855	10.8206
18	e14control1_dapi_m21_mtmg_celsr1_006.nd2	6.1	2.65	5.5	0	0	0			0.901639	1.12355	64.3744
19	e14control1_dapi_m21_mtmg_celsr1_007.nd2	6.59	4.29	5	0	0	0			0.758725	0.861354	49.352
20	e14control1_dapi_m21_mtmg_celsr1_007.nd2	10.2	8.89	5	0	0	0			0.490196	0.512315	29.3535
21	e14control1_dapi_m21_mtmg_celsr1_007.nd2	7.13	6.47	3	0	0	0			0.420757	0.43428	24.8824
22	e14control1_dapi_m21_mtmg_celsr1_007.nd2	6.32	4.89	4	0	0	0			0.632911	0.685308	39.2652
23	e14control1_dapi_m21_mtmg_celsr1_008.nd2	10.41	10.37	1	0	0	0			0.0960615	0.0962098	5.51242
24	e14control1_dapi_m21_mtmg_celsr1_008.nd2	8.29	8.29	0	0	0	0			0	0	0
25	e14control1_dapi_m21_mtmg_celsr1_009.nd2	7.18	6.27	3.5	0	0	0			0.487465	0.509184	29.1741
26	e14control1_dapi_m21_mtmg_celsr1_009.nd2	4.94	3.49	3.5	0	0	0			0.708502	0.787373	45.1132
27	e14control1_dapi_m21_mtmg_celsr1_009.nd2	5.4	2.98	4.5	0	0	0			0.833333	0.985111	56.4427
28	e14control1_dapi_m21_mtmg_celsr1_009.nd2	9.12	9	1.5	0	0	0			0.164474	0.165224	9.46666
29	e14control1_dapi_m21_mtmg_celsr1_010.nd2	7.14	6.48	3	0	0	0			0.420168	0.433631	24.8452
30	e14control1_dapi_m21_mtmg_celsr1_010.nd2	5.64	1.24	5.5	0	0	0			0.975177	1.34752	77.2072
31	e14control1_dapi_m21_mtmg_celsr1_010.nd2	6.61	5.89	3	0	0	0			0.453858	0.47109	26.9915
32	e14control1_dapi_m21_mtmg_celsr1_010.nd2	9.85	9.84	0.5	0	0	0			0.0507614	0.0507832	2.90967
33	e14control1_dapi_m21_mtmg_celsr1_011.nd2	12.32	12.27	1	0	0	0			0.0811688	0.0812582	4.65575
34	e14control1_dapi_m21_mtmg_celsr1_011.nd2	8.72	8.71	0.5	0	0	0			0.0573394	0.0573709	3.28711
35	e14control1_dapi_m21_mtmg_celsr1_012.nd2	9	8.87	1.5	0	0	0			0.166667	0.167448	9.59407
36	e14control1_dapi_m21_mtmg_celsr1_012.nd2	9.72	9.51	2	0	0	0			0.205761	0.207242	11.8741
37	e14control1_dapi_m21_mtmg_celsr1_013.nd2	9.02	8.96	1	0	0	0			0.110865	0.111093	6.36517
38	e14control1_dapi_m21_mtmg_celsr1_014.nd2	6.21	2.89	5.5	0	0	0			0.885668	1.08793	62.3339
39	e14control1_dapi_m21_mtmg_celsr1_014.nd2	8.94	8.22	3.5	0	0	0			0.391499	0.40226	23.0478
40	e14control1_dapi_m21_mtmg_celsr1_014.nd2	5.46	3.71	4	0	0	0			0.732601	0.822135	47.1049
41	e14control1_dapi_m21_mtmg_celsr1_014.nd2	6.77	5.46	4	0	0	0			0.590842	0.632102	36.2168
42	e14control1_dapi_m21_mtmg_celsr1_014.nd2	8.27	7.71	3	0	0	0			0.362757	0.371225	21.2696
43	e14control1_dapi_m21_mtmg_celsr1_015.nd2	11.64	11.37	2.5	0	0	0			0.214777	0.216463	12.4024
44	e14control2_dapi_m21_mtmg_celsr1_001.nd2	6.42	5.38	3.5	0	0	0			0.545171	0.576593	33.0364
45	e14control2_dapi_m21_mtmg_celsr1_001.nd2	7.05	6.76	2	0	0	0			0.283688	0.287638	16.4804
46	e14control2_dapi_m21_mtmg_celsr1_002.nd2	12.21	11.7	3.5	0	0	0			0.28665	0.290729	16.6575
47	e14control2_dapi_m21_mtmg_celsr1_002.nd2	9.56	9.56	0	0	0	0			0	0	0
48	e14control2_dapi_m21_mtmg_celsr1_002.nd2	10.51	10.47	1	0	0	0			0.0951475	0.0952916	5.45981
49	e14control2_dapi_m21_mtmg_celsr1_002.nd2	9.73	9.71	0.5	0	0	0			0.0513875	0.0514101	2.94558
50	e14control2_dapi_m21_mtmg_celsr1_002.nd2	9.13	7.64	5	0	0	0			0.547645	0.579547	33.2056
51	e14control2_dapi_m21_mtmg_celsr1_002.nd2	9.78	5.63	8	0	0	0			0.817996	0.957918	54.8847
52	e14control2_dapi_m21_mtmg_celsr1_002.nd2	10.11	8.49	5.5	0	0	0			0.544016	0.575216	32.9574
53	e14control2_dapi_m21_mtmg_celsr1_002.nd2	11.15	10.74	3	0	0	0			0.269058	0.272415	15.6082
54	e14control2_dapi_m21_mtmg_celsr1_002.nd2	8.48	6.85	5	0	0	0			0.589623	0.630592	36.1302
55	e14control2_dapi_m21_mtmg_celsr1_003.nd2	11.55	11.51	1	0	0	0			0.0865801	0.0866886	4.96689
56	e14control2_dapi_m21_mtmg_celsr1_003.nd2	8.61	8.61	0	0	0	0			0	0	0
57	e14control2_dapi_m21_mtmg_celsr1_003.nd2	7.43	5.5	5	0	0	0			0.672948	0.738186	42.295
58	e14control2_dapi_m21_mtmg_celsr1_004.nd2	8.85	8.84	0.5	0	0	0			0.0564972	0.0565273	3.23877
59	e14control2_dapi_m21_mtmg_celsr1_004.nd2	8.67	8.67	0	0	0	0			0	0	0
60	e14control2_dapi_m21_mtmg_celsr1_005.nd2	11.35	11.31	1	0	0	0			0.0881057	0.0882201	5.05464
61	e14control2_dapi_m21_mtmg_celsr1_005.nd2	7.85	7.7	1.5	0	0	0			0.191083	0.192265	11.016
62	e14control2_dapi_m21_mtmg_celsr1_005.nd2	8.33	8.08	2	0	0	0			0.240096	0.242465	13.8922
63	e14control2_dapi_m21_mtmg_celsr1_005.nd2	11.92	11.88	1	0	0	0			0.0838926	0.0839913	4.81235
64	e14control2_dapi_m21_mtmg_celsr1_005.nd2	10.79	10.74	1	0	0	0			0.0926784	0.0928116	5.31771
65	e14control2_dapi_m21_mtmg_celsr1_006.nd2	9.51	9.46	1	0	0	0			0.105152	0.105347	6.03595
66	e14control2_dapi_m21_mtmg_celsr1_006.nd2	8.62	8.49	1.5	0	0	0			0.174014	0.174904	10.0213
67	e14control2_dapi_m21_mtmg_celsr1_006.nd2	7.44	2.53	7	0	0	0			0.94086	1.22516	70.1965
68	e14control2_dapi_m21_mtmg_celsr1_006.nd2	7.82	7.82	0	0	0	0			0	0	0
69	e14control2_dapi_m21_mtmg_celsr1_006.nd2	6.59	3.63	5.5	0	0	0			0.834598	0.987402	56.574
70	e14control2_dapi_m21_mtmg_celsr1_006.nd2	6.55	4.76	4.5	0	0	0			0.687023	0.757384	43.3949
71	e14control2_dapi_m21_mtmg_celsr1_006.nd2	7.61	7.18	2.5	0	0	0			0.328515	0.334731	19.1787
72	e14control2_dapi_m21_mtmg_celsr1_007.nd2	5.77	1.75	5.5	0	0	0			0.953206	1.26367	72.403
73	e14control2_dapi_m21_mtmg_celsr1_007.nd2	8.17	7.13	4	0	0	0			0.489596	0.511626	29.314
74	e14control2_dapi_m21_mtmg_celsr1_007.nd2	9.78	9.78	0	0	0	0			0	0	0
75	e14control2_dapi_m21_mtmg_celsr1_008.nd2	9.79	9.79	0	0	0	0			0	0	0
76	e14control2_dapi_m21_mtmg_celsr1_008.nd2	9.29	8.95	2.5	0	0	0			0.269107	0.272465	15.6111
77	e14control2_dapi_m21_mtmg_celsr1_008.nd2	8.03	7.96	1	0	0	0			0.124533	0.124857	7.15379
78	e14control2_dapi_m21_mtmg_celsr1_008.nd2	6.19	4.25	4.5	0	0	0			0.726979	0.813912	46.6337
79	e14control2_dapi_m21_mtmg_celsr1_008.nd2	9.93	9.88	1	0	0	0			0.100705	0.100876	5.77977
80	e14control2_dapi_m21_mtmg_celsr1_009.nd2	10.04	10.04	0	0	0	0			0	0	0
81	e14control2_dapi_m21_mtmg_celsr1_010.nd2	9.96	8.61	5	0	0	0			0.502008	0.525919	30.1329
82	e14control2_dapi_m21_mtmg_celsr1_010.nd2	8.92	8.87	1	0	0	0			0.112108	0.112344	6.43683
83	e14control2_dapi_m21_mtmg_celsr1_010.nd2	10.29	10.24	1	0	0	0			0.0971817	0.0973354	5.5769
84	e14control2_dapi_m21_mtmg_celsr1_010.nd2	10.6	10.6	0	0	0	0			0	0	0
85	e14control2_dapi_m21_mtmg_celsr1_011.nd2	7.43	2.49	7	0	0	0			0.942127	1.22892	70.4118
86	e14control2_dapi_m21_mtmg_celsr1_013.nd2	8.49	6.47	5.5	0	0	0			0.647821	0.704721	40.3775
87	e14control2_dapi_m21_mtmg_celsr1_014.nd2	8.49	8.43	1	0	0	0			0.117786	0.11806	6.76432
88	e14control2_dapi_m21_mtmg_celsr1_014.nd2	9.3	8.14	4.5	0	0	0			0.483871	0.505073	28.9385
89	e14control2_dapi_m21_mtmg_celsr1_015.nd2	8.8	8.79	0.5	0	0	0			0.0568182	0.0568488	3.2572
90	e14control2_dapi_m21_mtmg_celsr1_015.nd2	7.84	7.78	1	0	0	0			0.127551	0.127899	7.3281
91	e14WT_dapi_m21_mtmg_celsr1_001.nd2	10.76	10.57	2	0	0	0			0.185874	0.186961	10.7121
92	e14WT_dapi_m21_mtmg_celsr1_001.nd2	9.36	9.31	1	0	0	0			0.106838	0.107042	6.13305
93	e14WT_dapi_m21_mtmg_celsr1_001.nd2	11.87	11.7	2	0	0	0			0.168492	0.1693	9.70015
94	e14WT_dapi_m21_mtmg_celsr1_001.nd2	10.23	10.18	1	0	0	0			0.0977517	0.0979081	5.60972
95	e14WT_dapi_m21_mtmg_celsr1_002.nd2	12.71	12.71	0	0	0	0			0	0	0
96	e14WT_dapi_m21_mtmg_celsr1_003.nd2	8.94	7.41	5	0	0	0			0.559284	0.593522	34.0063
97	e14WT_dapi_m21_mtmg_celsr1_003.nd2	6.77	3.13	6	0	0	0			0.886263	1.08921	62.4073
98	e14WT_dapi_m21_mtmg_celsr1_003.nd2	9.56	9.51	1	0	0	0			0.104603	0.104794	6.00427
99	e14WT_dapi_m21_mtmg_celsr1_003.nd2	6.55	2.62	6	0	0	0			0.916031	1.15807	66.3525
100	e14WT_dapi_m21_mtmg_celsr1_004.nd2	11.3	11.25	1	0	0	0			0.0884956	0.0886115	5.07706
101	e14WT_dapi_m21_mtmg_celsr1_004.nd2	11.54	11.5	1	0	0	0			0.0866551	0.0867639	4.97121
102	e14WT_dapi_m21_mtmg_celsr1_004.nd2	10.79	10.74	1	0	0	0			0.0926784	0.0928116	5.31771
103	e14WT_dapi_m21_mtmg_celsr1_004.nd2	12.27	12.23	1	0	0	0			0.0814996	0.0815901	4.67477
104	e14WT_dapi_m21_mtmg_celsr1_004.nd2	12.79	12.75	1	0	0	0			0.0781861	0.078266	4.48431
105	e14WT_dapi_m21_mtmg_celsr1_005.nd2	10.99	10.95	1	0	0	0			0.0909918	0.0911178	5.22067
106	e14WT_dapi_m21_mtmg_celsr1_005.nd2	12.9	12.75	2	0	0	0			0.155039	0.155667	8.91904
107	e14WT_dapi_m21_mtmg_celsr1_005.nd2	10.1	8.78	5	0	0	0			0.49505	0.517892	29.673
108	e14WT_dapi_m21_mtmg_celsr1_006.nd2	7.86	6.07	5	0	0	0			0.636132	0.689475	39.504
109	e14WT_dapi_m21_mtmg_celsr1_006.nd2	7.47	5.55	5	0	0	0			0.669344	0.733326	42.0165
110	e14WT_dapi_m21_mtmg_celsr1_007.nd2	5.97	3.25	5	0	0	0			0.837521	0.99273	56.8793
111	e14WT_dapi_m21_mtmg_celsr1_007.nd2	7.1	3.79	6	0	0	0			0.84507	1.0067	57.6795
112	e14WT_dapi_m21_mtmg_celsr1_007.nd2	6	0	6	0	0	0			1	1.5708	90
113	e14WT_dapi_m21_mtmg_celsr1_007.nd2	12.67	12.51	2	0	0	0			0.157853	0.158516	9.08231
114	e14WT_dapi_m21_mtmg_celsr1_008.nd2	9.03	8.97	1	0	0	0			0.110742	0.11097	6.35809
115	e14WT_dapi_m21_mtmg_celsr1_008.nd2	10.24	9.43	4	0	0	0			0.390625	0.40131	22.9934
116	e14WT_dapi_m21_mtmg_celsr1_008.nd2	9.43	8.54	4	0	0	0			0.424178	0.438054	25.0987
117	e14WT_dapi_m21_mtmg_celsr1_009.nd2	9.24	8.33	4	0	0	0			0.4329	0.447708	25.6518
118	e14WT_dapi_m21_mtmg_celsr1_009.nd2	10.25	10.25	0	0	0	0			0	0	0
119	e14WT_dapi_m21_mtmg_celsr1_010.nd2	10.47	10.42	1	0	0	0			0.095511	0.0956568	5.48073
120	e14WT_dapi_m21_mtmg_celsr1_010.nd2	8.88	7.34	5	0	0	0			0.563063	0.598088	34.2679
121	e14WT_dapi_m21_mtmg_celsr1_011.nd2	7.9	5.14	6	0	0	0			0.759494	0.862534	49.4196
122	e14WT_dapi_m21_mtmg_celsr1_011.nd2	11.35	11.35	0	0	0	0			0	0	0
123	e14WT_dapi_m21_mtmg_celsr1_012.nd2	11.1	10.92	2	0	0	0			0.18018	0.18117	10.3803
124	e14WT_dapi_m21_mtmg_celsr1_012.nd2	10.37	10.18	2	0	0	0			0.192864	0.19408	11.12
125	e14WT_dapi_m21_mtmg_celsr1_012.nd2	10.12	9.67	3	0	0	0			0.296443	0.300966	17.2441
126	e14WT_dapi_m21_mtmg_celsr1_013.nd2	10.3	10.1	2	0	0	0			0.194175	0.195416	11.1965
127	e14WT_dapi_m21_mtmg_celsr1_013.nd2	6.02	6.02	0	0	0	0			0	0	0
128	e14WT_dapi_m21_mtmg_celsr1_013.nd2	7.29	4.14	6	0	0	0			0.823045	0.966752	55.3908
129	e14WT_dapi_m21_mtmg_celsr1_013.nd2	10.62	10.57	1	0	0	0			0.094162	0.0943017	5.40309
130	e14WT_dapi_m21_mtmg_celsr1_014.nd2	7.75	5.92	5	0	0	0			0.645161	0.701234	40.1778
131	e14WT_dapi_m21_mtmg_celsr1_014.nd2	11.84	11.8	1	0	0	0			0.0844595	0.0845602	4.84494
132	e14WT_dapi_m21_mtmg_celsr1_014.nd2	10.03	10.03	0	0	0	0			0	0	0
133	e14WT_dapi_m21_mtmg_celsr1_015.nd2	11.6	11.56	1	0	0	0			0.0862069	0.086314	4.94543
134	e14WT_dapi_m21_mtmg_celsr1_015.nd2	12.44	12.07	3	0	0	0			0.241158	0.243558	13.9549
Item	Source	Length xyz	Length xy	Height	ND.T	ND.Z	ND.M	Comment		sin theta	angle_radians	angle_degrees
1	e14Tm1_dapi_m21_mtmg_celsr1_001.nd2	6.17	1.45	6	0	0	0			0.972447	1.33551	76.519
2	e14Tm1_dapi_m21_mtmg_celsr1_001.nd2	10.74	9.97	4	0	0	0			0.372439	0.381636	21.8661
3	e14Tm1_dapi_m21_mtmg_celsr1_001.nd2	6.63	5.29	4	0	0	0			0.603318	0.647655	37.1079
4	e14Tm1_dapi_m21_mtmg_celsr1_002.nd2	7.13	2.92	6.5	0	0	0			0.911641	1.14726	65.7331
5	e14Tm1_dapi_m21_mtmg_celsr1_003.nd2	8.52	6.05	6	0	0	0			0.704225	0.781331	44.767
6	e14Tm1_dapi_m21_mtmg_celsr1_003.nd2	9.29	7.83	5	0	0	0			0.538213	0.568316	32.5621
7	e14Tm1_dapi_m21_mtmg_celsr1_003.nd2	8.86	6.52	6	0	0	0			0.677201	0.743952	42.6253
8	e14Tm1_dapi_m21_mtmg_celsr1_004.nd2	6.53	2.57	6	0	0	0			0.918836	1.16512	66.7565
9	e14Tm1_dapi_m21_mtmg_celsr1_004.nd2	9.11	6.86	6	0	0	0			0.658617	0.718979	41.1945
10	e14Tm1_dapi_m21_mtmg_celsr1_004.nd2	7	0.16	7	0	0	0			1	1.5708	90
11	e14Tm1_dapi_m21_mtmg_celsr1_004.nd2	6.75	3.91	5.5	0	0	0			0.814815	0.95241	54.5691
12	e14Tm1_dapi_m21_mtmg_celsr1_005.nd2	10.34	6.55	8	0	0	0			0.773694	0.884652	50.6868
13	e14Tm1_dapi_m21_mtmg_celsr1_005.nd2	6.4	3.27	5.5	0	0	0			0.859375	1.03405	59.2465
14	e14Tm1_dapi_m21_mtmg_celsr1_005.nd2	9.72	8.61	4.5	0	0	0			0.462963	0.481335	27.5785
15	e14Tm1_dapi_m21_mtmg_celsr1_005.nd2	9.13	5.2	7.5	0	0	0			0.821468	0.96398	55.232
16	e14Tm1_dapi_m21_mtmg_celsr1_006.nd2	9.09	6.83	6	0	0	0			0.660066	0.720907	41.3049
17	e14Tm1_dapi_m21_mtmg_celsr1_006.nd2	6.84	2.14	6.5	0	0	0			0.950292	1.25417	71.8589
18	e14Tm1_dapi_m21_mtmg_celsr1_007.nd2	7.01	3.63	6	0	0	0			0.85592	1.02733	58.8615
19	e14Tm1_dapi_m21_mtmg_celsr1_007.nd2	8.11	1.31	8	0	0	0			0.986436	1.40591	80.5525
20	e14Tm1_dapi_m21_mtmg_celsr1_007.nd2	9.12	1.45	9	0	0	0			0.986842	1.4084	80.6952
21	e14Tm1_dapi_m21_mtmg_celsr1_007.nd2	8.26	5.1	6.5	0	0	0			0.786925	0.90581	51.8991
22	e14Tm1_dapi_m21_mtmg_celsr1_008.nd2	8.05	6.31	5	0	0	0			0.621118	0.670168	38.3978
23	e14Tm1_dapi_m21_mtmg_celsr1_008.nd2	7	4.33	5.5	0	0	0			0.785714	0.90385	51.7868
24	e14Tm1_dapi_m21_mtmg_celsr1_008.nd2	11.19	11.18	0.5	0	0	0			0.0446828	0.0446976	2.56099
25	e14Tm1_dapi_m21_mtmg_celsr1_009.nd2	6.54	4.22	5	0	0	0			0.764526	0.870306	49.8648
26	e14Tm1_dapi_m21_mtmg_celsr1_009.nd2	7.24	6.03	4	0	0	0			0.552486	0.585344	33.5377
27	e14Tm1_dapi_m21_mtmg_celsr1_009.nd2	13.69	13.68	0.5	0	0	0			0.036523	0.0365311	2.09308
28	e14Tm1_dapi_m21_mtmg_celsr1_010.nd2	7.97	7.57	2.5	0	0	0			0.313676	0.319062	18.2809
29	e14Tm1_dapi_m21_mtmg_celsr1_010.nd2	8.35	7.03	4.5	0	0	0			0.538922	0.569157	32.6103
30	e14Tm1_dapi_m21_mtmg_celsr1_010.nd2	11.62	8.87	7.5	0	0	0			0.645439	0.701598	40.1986
31	e14Tm1_dapi_m21_mtmg_celsr1_011.nd2	8.12	1.39	8	0	0	0			0.985222	1.39866	80.1375
32	e14Tm1_dapi_m21_mtmg_celsr1_011.nd2	10.23	5.69	8.5	0	0	0			0.83089	0.980704	56.1902
33	e14Tm1_dapi_m21_mtmg_celsr1_011.nd2	7.87	4.44	6.5	0	0	0			0.825921	0.971834	55.682
34	e14Tm1_dapi_m21_mtmg_celsr1_011.nd2	8.25	5.09	6.5	0	0	0			0.787879	0.907357	51.9877
35	e14Tm1_dapi_m21_mtmg_celsr1_011.nd2	8.21	3.33	7.5	0	0	0			0.91352	1.15185	65.9964
36	e14Tm1_dapi_m21_mtmg_celsr1_011.nd2	11.23	8.78	7	0	0	0			0.62333	0.672995	38.5597
37	e14Tm1_dapi_m21_mtmg_celsr1_012.nd2	8.48	5.99	6	0	0	0			0.707547	0.786021	45.0357
38	e14Tm1_dapi_m21_mtmg_celsr1_013.nd2	8.08	1.14	8	0	0	0			0.990099	1.42996	81.9307
39	e14Tm1_dapi_m21_mtmg_celsr1_013.nd2	8.57	3.07	8	0	0	0			0.933489	1.20402	68.9854
40	e14Tm1_dapi_m21_mtmg_celsr1_014.nd2	9.33	6.69	6.5	0	0	0			0.696677	0.770755	44.161
41	e14Tm1_dapi_m21_mtmg_celsr1_014.nd2	8.11	4.1	7	0	0	0			0.863132	1.04144	59.6701
42	e14Tm1_dapi_m21_mtmg_celsr1_014.nd2	9.78	6.83	7	0	0	0			0.715746	0.797692	45.7044
43	e14Tm1_dapi_m21_mtmg_celsr1_014.nd2	9.72	4.72	8.5	0	0	0			0.874486	1.06437	60.9842
44	e14Tm1_dapi_m21_mtmg_celsr1_014.nd2	9.71	8.6	4.5	0	0	0			0.46344	0.481873	27.6093
45	e14Tm1_dapi_m21_mtmg_celsr1_015.nd2	10.77	5.08	9.5	0	0	0			0.88208	1.08026	61.8943
46	e14Tm1_dapi_m21_mtmg_celsr1_015.nd2	9.42	5.71	7.5	0	0	0			0.796178	0.920953	52.7667
47	e14Tm1_dapi_m21_mtmg_celsr1_015.nd2	10.5	6.8	8	0	0	0			0.761905	0.866249	49.6324
48	e14Tm1_dapi_m21_mtmg_celsr1_015.nd2	7.48	5.56	5	0	0	0			0.668449	0.732122	41.9475
49	e14Tm2_dapi_m21_mtmg_celsr1_001.nd2	6.03	4.01	4.5	0	0	0			0.746269	0.842439	48.2682
50	e14Tm2_dapi_m21_mtmg_celsr1_001.nd2	10.17	8.55	5.5	0	0	0			0.540806	0.571395	32.7385
51	e14Tm2_dapi_m21_mtmg_celsr1_001.nd2	10.31	10.26	1	0	0	0			0.0969932	0.0971459	5.56605
52	e14Tm2_dapi_m21_mtmg_celsr1_001.nd2	4.96	2.93	4	0	0	0			0.806452	0.938126	53.7507
53	e14Tm2_dapi_m21_mtmg_celsr1_001.nd2	6.34	3.9	5	0	0	0			0.788644	0.9086	52.0589
54	e14Tm2_dapi_m21_mtmg_celsr1_001.nd2	8.7	7.97	3.5	0	0	0			0.402299	0.414026	23.722
55	e14Tm2_dapi_m21_mtmg_celsr1_001.nd2	5.67	4.01	4	0	0	0			0.705467	0.783082	44.8673
56	e14Tm2_dapi_m21_mtmg_celsr1_001.nd2	5.4	4.11	3.5	0	0	0			0.648148	0.70515	40.4021
57	e14Tm2_dapi_m21_mtmg_celsr1_002.nd2	7.6	3.93	6.5	0	0	0			0.855263	1.02606	58.7888
58	e14Tm2_dapi_m21_mtmg_celsr1_002.nd2	5.98	3.29	5	0	0	0			0.83612	0.990172	56.7327
59	e14Tm2_dapi_m21_mtmg_celsr1_002.nd2	9.97	9.51	3	0	0	0			0.300903	0.305639	17.5118
60	e14Tm2_dapi_m21_mtmg_celsr1_003.nd2	12.06	12.02	1	0	0	0			0.0829187	0.0830141	4.75635
61	e14Tm2_dapi_m21_mtmg_celsr1_003.nd2	6.29	6.27	0.5	0	0	0			0.0794913	0.0795752	4.55932
62	e14Tm2_dapi_m21_mtmg_celsr1_003.nd2	8.66	7.92	3.5	0	0	0			0.404157	0.416057	23.8383
63	e14Tm2_dapi_m21_mtmg_celsr1_004.nd2	9.36	7.18	6	0	0	0			0.641026	0.695834	39.8683
64	e14Tm2_dapi_m21_mtmg_celsr1_004.nd2	7.52	0.49	7.5	0	0	0			0.99734	1.49785	85.8203
65	e14Tm2_dapi_m21_mtmg_celsr1_004.nd2	8.23	8.1	1.5	0	0	0			0.18226	0.183284	10.5014
66	e14Tm2_dapi_m21_mtmg_celsr1_004.nd2	6.46	5.08	4	0	0	0			0.619195	0.667717	38.2574
67	e14Tm2_dapi_m21_mtmg_celsr1_005.nd2	7.86	7.27	3	0	0	0			0.381679	0.391613	22.4377
68	e14Tm2_dapi_m21_mtmg_celsr1_005.nd2	10.26	10.25	0.5	0	0	0			0.0487329	0.0487523	2.7933
69	e14Tm2_dapi_m21_mtmg_celsr1_005.nd2	7.06	5.82	4	0	0	0			0.566572	0.60234	34.5115
70	e14Tm2_dapi_m21_mtmg_celsr1_006.nd2	9.83	9.18	3.5	0	0	0			0.356053	0.364041	20.858
71	e14Tm2_dapi_m21_mtmg_celsr1_006.nd2	9.91	8.83	4.5	0	0	0			0.454087	0.471347	27.0062
72	e14Tm2_dapi_m21_mtmg_celsr1_006.nd2	8.46	7.46	4	0	0	0			0.472813	0.492481	28.2171
73	e14Tm2_dapi_m21_mtmg_celsr1_006.nd2	8.86	6.94	5.5	0	0	0			0.620767	0.669721	38.3722
74	e14Tm2_dapi_m21_mtmg_celsr1_007.nd2	7.16	1.5	7	0	0	0			0.977654	1.35899	77.8646
75	e14Tm2_dapi_m21_mtmg_celsr1_007.nd2	7	0	7	0	0	0			1	1.5708	90
76	e14Tm2_dapi_m21_mtmg_celsr1_007.nd2	7.51	0.36	7.5	0	0	0			0.998668	1.51919	87.0429
77	e14Tm2_dapi_m21_mtmg_celsr1_007.nd2	10.77	10.76	0.5	0	0	0			0.0464253	0.0464419	2.66093
78	e14Tm2_dapi_m21_mtmg_celsr1_008.nd2	10.98	10.87	1.5	0	0	0			0.136612	0.137041	7.85185
79	e14Tm2_dapi_m21_mtmg_celsr1_008.nd2	10.32	10.01	2.5	0	0	0			0.242248	0.244682	14.0193
80	e14Tm2_dapi_m21_mtmg_celsr1_008.nd2	9.51	9.46	1	0	0	0			0.105152	0.105347	6.03595
81	e14Tm2_dapi_m21_mtmg_celsr1_008.nd2	7.45	5.52	5	0	0	0			0.671141	0.735747	42.1552
82	e14Tm2_dapi_m21_mtmg_celsr1_008.nd2	7.12	4.52	5.5	0	0	0			0.772472	0.882724	50.5764
83	e14Tm2_dapi_m21_mtmg_celsr1_009.nd2	9.69	9.22	3	0	0	0			0.309598	0.31477	18.035
84	e14Tm2_dapi_m21_mtmg_celsr1_009.nd2	7.41	3.56	6.5	0	0	0			0.877193	1.06998	61.3056
85	e14Tm2_dapi_m21_mtmg_celsr1_009.nd2	8.52	2.93	8	0	0	0			0.938967	1.21962	69.8788
86	e14Tm2_dapi_m21_mtmg_celsr1_010.nd2	7.46	5.05	5.5	0	0	0			0.737265	0.829014	47.499
87	e14Tm2_dapi_m21_mtmg_celsr1_010.nd2	6.95	2.46	6.5	0	0	0			0.935252	1.20897	69.2689
88	e14Tm2_dapi_m21_mtmg_celsr1_010.nd2	10.05	10	1	0	0	0			0.0995025	0.0996674	5.71052
89	e14Tm2_dapi_m21_mtmg_celsr1_010.nd2	8.75	8.22	3	0	0	0			0.342857	0.349957	20.051
90	e14Tm2_dapi_m21_mtmg_celsr1_011.nd2	10.93	10.89	1	0	0	0			0.0914913	0.0916194	5.24941
91	e14Tm2_dapi_m21_mtmg_celsr1_012.nd2	8.97	6.18	6.5	0	0	0			0.724638	0.810508	46.4387
92	e14Tm2_dapi_m21_mtmg_celsr1_012.nd2	8.35	3.67	7.5	0	0	0			0.898204	1.11567	63.9229
93	e14Tm2_dapi_m21_mtmg_celsr1_012.nd2	8.16	5.53	6	0	0	0			0.735294	0.826101	47.3321
94	e14Tm2_dapi_m21_mtmg_celsr1_012.nd2	5.89	2.11	5.5	0	0	0			0.933786	1.20485	69.0329
95	e14Tm2_dapi_m21_mtmg_celsr1_012.nd2	9.82	7.78	6	0	0	0			0.610998	0.657321	37.6617
96	e14Tm2_dapi_m21_mtmg_celsr1_012.nd2	10.99	10.98	0.5	0	0	0			0.0454959	0.0455116	2.60762
97	e14Tm2_dapi_m21_mtmg_celsr1_012.nd2	10.01	9.18	4	0	0	0			0.3996	0.411081	23.5532
98	e14Tm2_dapi_m21_mtmg_celsr1_013.nd2	8.55	4.91	7	0	0	0			0.818713	0.959167	54.9562
99	e14Tm2_dapi_m21_mtmg_celsr1_013.nd2	8.18	7.93	2	0	0	0			0.244499	0.247003	14.1522
100	e14Tm2_dapi_m21_mtmg_celsr1_013.nd2	10.59	7.95	7	0	0	0			0.661001	0.722152	41.3763
101	e14Tm2_dapi_m21_mtmg_celsr1_013.nd2	10.85	10.66	2	0	0	0			0.184332	0.185392	10.6222
102	e14Tm2_dapi_m21_mtmg_celsr1_013.nd2	8.39	5.87	6	0	0	0			0.715137	0.79682	45.6544
103	e14Tm2_dapi_m21_mtmg_celsr1_014.nd2	9.65	1.7	9.5	0	0	0			0.984456	1.39425	79.8846
104	e14Tm2_dapi_m21_mtmg_celsr1_014.nd2	6.5	0	6.5	0	0	0			1	1.5708	90
105	e14Tm2_dapi_m21_mtmg_celsr1_014.nd2	8.43	2.65	8	0	0	0			0.948992	1.25002	71.621
106	e14Tm2_dapi_m21_mtmg_celsr1_015.nd2	7.96	4.6	6.5	0	0	0			0.816583	0.955466	54.7442
107	e14Tm2_dapi_m21_mtmg_celsr1_015.nd2	5.43	3.04	4.5	0	0	0			0.828729	0.976833	55.9684
108	e14Tm2_dapi_m21_mtmg_celsr1_015.nd2	8.68	8.67	0.5	0	0	0			0.0576037	0.0576356	3.30228
109	e14Tm2_dapi_m21_mtmg_celsr1_015.nd2	8.42	2.62	8	0	0	0			0.950119	1.25362	71.8269
110	e14Tm3_dapi_m21_mtmg_celsr1_001.nd2	5.09	3.16	4	0	0	0			0.785855	0.904077	51.7998
111	e14Tm3_dapi_m21_mtmg_celsr1_001.nd2	7	0	7	0	0	0			1	1.5708	90
112	e14Tm3_dapi_m21_mtmg_celsr1_001.nd2	6.61	2.76	6	0	0	0			0.907716	1.13781	65.1915
113	e14Tm3_dapi_m21_mtmg_celsr1_001.nd2	7.84	5.05	6	0	0	0			0.765306	0.871517	49.9342
114	e14Tm3_dapi_m21_mtmg_celsr1_001.nd2	7.37	6.73	3	0	0	0			0.407056	0.419228	24.02
115	e14Tm3_dapi_m21_mtmg_celsr1_001.nd2	8.44	4.71	7	0	0	0			0.829384	0.978004	56.0355
116	e14Tm3_dapi_m21_mtmg_celsr1_001.nd2	6.48	2.46	6	0	0	0			0.925926	1.18348	67.8084
117	e14Tm3_dapi_m21_mtmg_celsr1_001.nd2	8.69	8.64	1	0	0	0			0.115075	0.11533	6.60794
118	e14Tm3_dapi_m21_mtmg_celsr1_002.nd2	7.52	4.53	6	0	0	0			0.797872	0.923757	52.9274
119	e14Tm3_dapi_m21_mtmg_celsr1_002.nd2	9.45	9.39	1	0	0	0			0.10582	0.106019	6.07442
120	e14Tm3_dapi_m21_mtmg_celsr1_002.nd2	8.3	4.46	7	0	0	0			0.843373	1.00353	57.4981
121	e14Tm3_dapi_m21_mtmg_celsr1_002.nd2	7.86	3.58	7	0	0	0			0.890585	1.09863	62.9469
122	e14Tm3_dapi_m21_mtmg_celsr1_003.nd2	9.08	7.58	5	0	0	0			0.550661	0.583156	33.4124
123	e14Tm3_dapi_m21_mtmg_celsr1_003.nd2	12.14	12.14	0	0	0	0			0	0	0
124	e14Tm3_dapi_m21_mtmg_celsr1_004.nd2	8.47	6.83	5	0	0	0			0.590319	0.631454	36.1796
125	e14Tm3_dapi_m21_mtmg_celsr1_005.nd2	6.62	5.27	4	0	0	0			0.60423	0.648799	37.1734
126	e14Tm3_dapi_m21_mtmg_celsr1_005.nd2	8.03	3.93	7	0	0	0			0.871731	1.05872	60.6604
127	e14Tm3_dapi_m21_mtmg_celsr1_006.nd2	11.17	10.99	2	0	0	0			0.179051	0.180022	10.3145
128	e14Tm3_dapi_m21_mtmg_celsr1_007.nd2	6.93	4.8	5	0	0	0			0.721501	0.805967	46.1785
129	e14Tm3_dapi_m21_mtmg_celsr1_007.nd2	6.39	2.19	6	0	0	0			0.938967	1.21962	69.8788
130	e14Tm3_dapi_m21_mtmg_celsr1_007.nd2	9.27	8.37	4	0	0	0			0.431499	0.446154	25.5628
131	e14Tm3_dapi_m21_mtmg_celsr1_008.nd2	9.16	5.91	7	0	0	0			0.764192	0.869788	49.8352
132	e14Tm3_dapi_m21_mtmg_celsr1_008.nd2	7.16	3.91	6	0	0	0			0.837989	0.993587	56.9284
133	e14Tm3_dapi_m21_mtmg_celsr1_008.nd2	9.25	9.2	1	0	0	0			0.108108	0.10832	6.20627
134	e14Tm3_dapi_m21_mtmg_celsr1_008.nd2	7.25	1.9	7	0	0	0			0.965517	1.30742	74.9098
135	e14Tm3_dapi_m21_mtmg_celsr1_009.nd2	6	0	6	0	0	0			1	1.5708	90
136	e14Tm3_dapi_m21_mtmg_celsr1_009.nd2	6.36	2.11	6	0	0	0			0.943396	1.23273	70.63
137	e14Tm3_dapi_m21_mtmg_celsr1_009.nd2	5.09	0.95	5	0	0	0			0.982318	1.38247	79.2095
138	e14Tm3_dapi_m21_mtmg_celsr1_009.nd2	6	0	6	0	0	0			1	1.5708	90
139	e14Tm3_dapi_m21_mtmg_celsr1_009.nd2	8.25	2.01	8	0	0	0			0.969697	1.32399	75.8589
140	e14Tm3_dapi_m21_mtmg_celsr1_010.nd2	7.73	7.67	1	0	0	0			0.129366	0.12973	7.43296
141	e14Tm3_dapi_m21_mtmg_celsr1_010.nd2	8.11	8.04	1	0	0	0			0.123305	0.123619	7.08286
142	e14Tm3_dapi_m21_mtmg_celsr1_010.nd2	9.51	9.3	2	0	0	0			0.210305	0.211887	12.1402
143	e14Tm3_dapi_m21_mtmg_celsr1_010.nd2	7.31	5.33	5	0	0	0			0.683995	0.753224	43.1566
144	e14Tm3_dapi_m21_mtmg_celsr1_010.nd2	7.65	7.59	1	0	0	0			0.130719	0.131094	7.51114
145	e14Tm3_dapi_m21_mtmg_celsr1_011.nd2	10.61	8.75	6	0	0	0			0.565504	0.601045	34.4373
146	e14Tm3_dapi_m21_mtmg_celsr1_011.nd2	6.1	6.01	1	0	0	0			0.163934	0.164678	9.43534
147	e14Tm3_dapi_m21_mtmg_celsr1_011.nd2	9.63	9.15	3	0	0	0			0.311526	0.316799	18.1512
148	e14Tm3_dapi_m21_mtmg_celsr1_012.nd2	6.04	3.38	5	0	0	0			0.827815	0.975201	55.8749
149	e14Tm3_dapi_m21_mtmg_celsr1_012.nd2	9.11	1.4	9	0	0	0			0.987925	1.41524	81.0872
150	e14Tm3_dapi_m21_mtmg_celsr1_013.nd2	6.89	3.38	6	0	0	0			0.870827	1.05688	60.5549
151	e14Tm3_dapi_m21_mtmg_celsr1_014.nd2	7.37	2.3	7	0	0	0			0.949796	1.25258	71.7678
152	e14Tm3_dapi_m21_mtmg_celsr1_014.nd2	7.94	3.75	7	0	0	0			0.881612	1.07927	61.8374
153	e14Tm3_dapi_m21_mtmg_celsr1_014.nd2	8.23	4.33	7	0	0	0			0.850547	1.01702	58.2712
154	e14Tm3_dapi_m21_mtmg_celsr1_014.nd2	7	0	7	0	0	0			1	1.5708	90
155	e14Tm3_dapi_m21_mtmg_celsr1_014.nd2	9.33	9.33	0	0	0	0			0	0	0
156	e14Tm3_dapi_m21_mtmg_celsr1_014.nd2	7.08	1.09	7	0	0	0			0.988701	1.42033	81.3786
157	e14Tm3_dapi_m21_mtmg_celsr1_015.nd2	7.71	7.44	2	0	0	0			0.259403	0.262404	15.0347
158	e14Tm3_dapi_m21_mtmg_celsr1_015.nd2	7.28	5.29	5	0	0	0			0.686813	0.757095	43.3784
159	e14Tm3_dapi_m21_mtmg_celsr1_015.nd2	7.27	1.96	7	0	0	0			0.962861	1.29741	74.3359
