# Supplementary material for: Epithelial geometry regulates spindle orientation and progenitor fate during formation of the mammalian epidermis
Source: eLife journal article supplement (doi:10.7554/elife.47102), 2019-06-12
Supplement: supp [file DivisionAngles.xlsx]

## Sheet: E14
Item	Source	Length xyz	Length xy	Height	ND.T	ND.Z	ND.M	Comment		sin theta	angle_radians	angle_degrees
1	e14Lp_notstretched_dapi_mtmg_001.nd2	8.53	2.97	8	0	0	0			0.937866	1.21643	69.6963
2	e14Lp_notstretched_dapi_mtmg_002.nd2	9.45	2.88	9	0	0	0			0.952381	1.26095	72.2472
3	e14Lp_notstretched_dapi_mtmg_002.nd2	9.13	8.21	4	0	0	0			0.438116	0.453502	25.9837
4	e14Lp_notstretched_dapi_mtmg_002.nd2	8.7	7.12	5	0	0	0			0.574713	0.612253	35.0795
5	e14Lp_notstretched_dapi_mtmg_003.nd2	7.88	7.29	3	0	0	0			0.380711	0.390565	22.3777
6	e14Lp_notstretched_dapi_mtmg_003.nd2	10.05	10	1	0	0	0			0.0995025	0.0996674	5.71052
7	e14Lp_notstretched_dapi_mtmg_003.nd2	7.64	4.72	6	0	0	0			0.78534	0.903246	51.7522
8	e14Lp_notstretched_dapi_mtmg_003.nd2	7.66	7.6	1	0	0	0			0.130548	0.130922	7.50128
9	e14Lp_notstretched_dapi_mtmg_004.nd2	7.8	4.98	6	0	0	0			0.769231	0.877636	50.2849
10	e14Lp_notstretched_dapi_mtmg_004.nd2	9.19	9.14	1	0	0	0			0.108814	0.10903	6.24695
11	e14Lp_notstretched_dapi_mtmg_004.nd2	6.76	3.11	6	0	0	0			0.887574	1.09205	62.57
12	e14Lp_notstretched_dapi_mtmg_005.nd2	8.56	4.92	7	0	0	0			0.817757	0.957503	54.8609
13	e14Lp_notstretched_dapi_mtmg_005.nd2	10.07	6.12	8	0	0	0			0.794439	0.918083	52.6023
14	e14Lp_notstretched_dapi_mtmg_005.nd2	8.98	8.46	3	0	0	0			0.334076	0.340624	19.5163
15	e14Lp_notstretched_dapi_mtmg_005.nd2	5.42	2.08	5	0	0	0			0.922509	1.17453	67.2957
16	e14Lp_notstretched_dapi_mtmg_005.nd2	7.2	3.98	6	0	0	0			0.833333	0.985111	56.4427
17	e14Lp_notstretched_dapi_mtmg_005.nd2	9.24	9.03	2	0	0	0			0.21645	0.218177	12.5006
18	e14Lp_notstretched_dapi_mtmg_006.nd2	8.49	7.48	4	0	0	0			0.471143	0.490586	28.1085
19	e14Lp_notstretched_dapi_mtmg_006.nd2	11.29	10.12	5	0	0	0			0.44287	0.458797	26.2871
20	e14Lp_notstretched_dapi_mtmg_006.nd2	8.47	7.46	4	0	0	0			0.472255	0.491847	28.1808
21	e14Lp_notstretched_dapi_mtmg_006.nd2	10.44	10	3	0	0	0			0.287356	0.291466	16.6997
22	e14Lp_notstretched_dapi_mtmg_006.nd2	8.35	8.35	0	0	0	0			0	0	0
23	e14Lp_notstretched_dapi_mtmg_006.nd2	8.7	8.16	3	0	0	0			0.344828	0.352055	20.1713
24	e14Lp_notstretched_dapi_mtmg_006.nd2	6.42	4.02	5	0	0	0			0.778816	0.892776	51.1523
25	e14Lp_notstretched_dapi_mtmg_006.nd2	6.11	1.17	6	0	0	0			0.981997	1.38076	79.1115
26	e14Lp_notstretched_dapi_mtmg_006.nd2	9.24	8.74	3	0	0	0			0.324675	0.330668	18.9459
27	e14Lp_notstretched_dapi_mtmg_008.nd2	4.13	1.04	4	0	0	0			0.968523	1.31923	75.5861
28	e14Lp_notstretched_dapi_mtmg_008.nd2	8.4	6.74	5	0	0	0			0.595238	0.637562	36.5296
29	e14Lp_notstretched_dapi_mtmg_008.nd2	9.63	9.58	1	0	0	0			0.103842	0.10403	5.96046
30	e14Lp_notstretched_dapi_mtmg_009.nd2	8.05	7.47	3	0	0	0			0.372671	0.381886	21.8804
31	e14Lp_notstretched_dapi_mtmg_009.nd2	8.55	8.5	1	0	0	0			0.116959	0.117227	6.71663
32	e14Lp_notstretched_dapi_mtmg_009.nd2	7.87	7.27	3	0	0	0			0.381194	0.391088	22.4077
33	e14Lp_notstretched_dapi_mtmg_009.nd2	8.91	8.85	1	0	0	0			0.112233	0.11247	6.44408
34	e14Lp_notstretched_dapi_mtmg_009.nd2	8.47	5.98	6	0	0	0			0.708383	0.787204	45.1035
35	e14Lp_notstretched_dapi_mtmg_009.nd2	8.18	1.71	8	0	0	0			0.977995	1.36062	77.958
36	e14Lp_notstretched_dapi_mtmg_010.nd2	9.98	9.93	1	0	0	0			0.1002	0.100369	5.75071
37	e14Lp_notstretched_dapi_mtmg_010.nd2	9.23	8.73	3	0	0	0			0.325027	0.33104	18.9672
38	e14Lp_notstretched_dapi_mtmg_010.nd2	8.73	7.76	4	0	0	0			0.45819	0.475958	27.2704
39	e14Lp_notstretched_dapi_mtmg_010.nd2	8.71	6.31	6	0	0	0			0.688863	0.75992	43.5402
40	8.29.2018 Control	7.43	5.5	5	0	0	0			0.672948	0.738186	42.295
41	8.29.2018 Control	6.17	1.45	6	0	0	0			0.972447	1.33551	76.519
42	8.29.2018 Control	9.65	8.26	5	0	0	0			0.518135	0.544669	31.2072
43	8.29.2018 Control	11.64	10.93	4	0	0	0			0.343643	0.350793	20.099
44	8.29.2018 Control	8.43	7.42	4	0	0	0			0.474496	0.494391	28.3265
45	8.29.2018 Control	9.91	9.07	4	0	0	0			0.403633	0.415484	23.8055
46	9.21.2018 Control	6.08	5.29	3	0	0	0			0.493421	0.516019	29.5657
47	9.21.2018 Control	4.24	1.41	4	0	0	0			0.943396	1.23273	70.63
48	9.21.2018 Control	8.09	7.52	3	0	0	0			0.370828	0.379901	21.7667
Item	Source	Length xyz	Length xy	Height	ND.T	ND.Z	ND.M	Comment		sin theta	angle_radians	angle_degrees
1	e14Lp_stretched_dapi_mtmg_002.nd2	10.06	9.23	4	0	0	0			0.397614	0.408915	23.4291
2	e14Lp_stretched_dapi_mtmg_002.nd2	8.52	8.46	1	0	0	0			0.117371	0.117642	6.74039
3	e14Lp_stretched_dapi_mtmg_002.nd2	7	6.92	1	0	0	0			0.142857	0.143348	8.21321
4	e14Lp_stretched_dapi_mtmg_002.nd2	6.76	6.68	1	0	0	0			0.147929	0.148474	8.50693
5	e14Lp_stretched_dapi_mtmg_002.nd2	8.05	6.31	5	0	0	0			0.621118	0.670168	38.3978
6	e14Lp_stretched_dapi_mtmg_002.nd2	9.76	8.38	5	0	0	0			0.512295	0.537855	30.8168
7	e14Lp_stretched_dapi_mtmg_002.nd2	7.58	4.63	6	0	0	0			0.791557	0.913352	52.3312
8	e14Lp_stretched_dapi_mtmg_003.nd2	7.29	7.01	2	0	0	0			0.274348	0.277912	15.9232
9	e14Lp_stretched_dapi_mtmg_003.nd2	7.73	6.61	4	0	0	0			0.517464	0.543885	31.1623
10	e14Lp_stretched_dapi_mtmg_003.nd2	8.83	8.83	0	0	0	0			0	0	0
11	e14Lp_stretched_dapi_mtmg_003.nd2	9.1	9.1	0	0	0	0			0	0	0
12	e14Lp_stretched_dapi_mtmg_006.nd2	7.45	7.18	2	0	0	0			0.268456	0.27179	15.5724
13	e14Lp_stretched_dapi_mtmg_006.nd2	9.52	9.47	1	0	0	0			0.105042	0.105236	6.02959
14	e14Lp_stretched_dapi_mtmg_006.nd2	9.36	9.31	1	0	0	0			0.106838	0.107042	6.13305
15	e14Lp_stretched_dapi_mtmg_007.nd2	7.92	7.66	2	0	0	0			0.252525	0.255289	14.627
16	e14Lp_stretched_dapi_mtmg_007.nd2	9.21	9.15	1	0	0	0			0.108578	0.108792	6.23333
17	e14Lp_stretched_dapi_mtmg_007.nd2	8.87	8.35	3	0	0	0			0.338219	0.345023	19.7684
18	e14Lp_stretched_dapi_mtmg_007.nd2	9.7	9.49	2	0	0	0			0.206186	0.207675	11.8989
19	e14Lp_stretched_dapi_mtmg_007.nd2	8.78	7.22	5	0	0	0			0.569476	0.605868	34.7137
20	e14Lp_stretched_dapi_mtmg_007.nd2	6.99	6.99	0	0	0	0			0	0	0
21	e14Lp_stretched_dapi_mtmg_008.nd2	5.87	5.04	3	0	0	0			0.511073	0.536433	30.7353
22	e14Lp_stretched_dapi_mtmg_009.nd2	8.65	8.59	1	0	0	0			0.115607	0.115866	6.63863
23	e14Lp_stretched_dapi_mtmg_009.nd2	6.38	6.3	1	0	0	0			0.15674	0.157389	9.01771
24	e14Lp_stretched_dapi_mtmg_009.nd2	7.39	7.32	1	0	0	0			0.135318	0.135734	7.77701
25	e14Lp_stretched_dapi_mtmg_009.nd2	9.59	7.49	6	0	0	0			0.625652	0.675967	38.73
26	e14Lp_stretched_dapi_mtmg_009.nd2	8.47	7.92	3	0	0	0			0.354191	0.362049	20.7439
27	e14Lp_stretched_dapi_mtmg_009.nd2	9.08	5.78	7	0	0	0			0.770925	0.880292	50.437
28	e14Lp_stretched_dapi_mtmg_009.nd2	7.15	6.86	2	0	0	0			0.27972	0.283503	16.2435
29	e14Lp_stretched_dapi_mtmg_010.nd2	7.8	7.73	1	0	0	0			0.128205	0.128559	7.36589
30	e14Lp_stretched_dapi_mtmg_010.nd2	7.14	7.07	1	0	0	0			0.140056	0.140518	8.05109
31	e14Lp_stretched_dapi_mtmg_010.nd2	8.14	8.08	1	0	0	0			0.12285	0.123161	7.05662
32	e14Lp_stretched_dapi_mtmg_010.nd2	8.34	2.36	8	0	0	0			0.959233	1.28427	73.5835
33	e14Lp_stretched_dapi_mtmg_010.nd2	8.21	8.21	0	0	0	0			0	0	0
34	e14Lp_stretched_dapi_mtmg_011.nd2	10.1	8.12	6	0	0	0			0.594059	0.636096	36.4456
35	e14Lp_stretched_dapi_mtmg_011.nd2	7.86	7.6	2	0	0	0			0.254453	0.257282	14.7412
36	e14Lp_stretched_dapi_mtmg_011.nd2	8.97	8.92	1	0	0	0			0.111483	0.111715	6.40079
37	e14Lp_stretched_dapi_mtmg_011.nd2	9.94	8.59	5	0	0	0			0.503018	0.527087	30.1999
38	e14Lp_stretched_dapi_mtmg_011.nd2	11.11	10.93	2	0	0	0			0.180018	0.181005	10.3708
39	8.29.2018 Stretched	7.68	5.82	5	0	0	0			0.651042	0.708956	40.6202
40	8.29.2018 Stretched	7.66	5.8	5	0	0	0			0.652742	0.711198	40.7486
41	8.29.2018 Stretched	9.3	9.08	2	0	0	0			0.215054	0.216747	12.4187
42	8.29.2018 Stretched	5.64	5.55	1	0	0	0			0.177305	0.178247	10.2128
43	8.29.2018 Stretched	12.41	12.41	0	0	0	0			0	0	0
44	8.29.2018 Stretched	11.79	11.4	3	0	0	0			0.254453	0.257282	14.7412
45	8.29.2018 Stretched	9.6	9.6	0	0	0	0			0	0	0
46	8.29.2018 Stretched	8.88	8.66	2	0	0	0			0.225225	0.227174	13.0161
47	8.29.2018 Stretched	9.78	8.41	5	0	0	0			0.511247	0.536636	30.747
48	8.29.2018 Stretched	5.53	3.82	4	0	0	0			0.723327	0.808609	46.3299
49	8.29.2018 Stretched	8.99	8.93	1	0	0	0			0.111235	0.111465	6.3865
50	8.29.2018 Stretched	11.76	7.56	9	0	0	0			0.765306	0.871517	49.9342
51	8.29.2018 Stretched	8.31	6.64	5	0	0	0			0.601685	0.645609	36.9907
52	8.29.2018 Stretched	11.63	11.58	1	0	0	0			0.0859845	0.0860908	4.93264
53	8.29.2018 Stretched	6.51	4.17	5	0	0	0			0.768049	0.875789	50.179
54	9.21.2018 Stretched	9.86	9.86	0	0	0	0			0	0	0
55	9.21.2018 Stretched	7.14	7.07	1	0	0	0			0.140056	0.140518	8.05109
56	9.21.2018 Stretched	7.74	3.3	7	0	0	0			0.904393	1.12995	64.7416
57	9.21.2018 Stretched	7.39	7.39	0	0	0	0			0	0	0
58	9.21.2018 Stretched	4.91	3.89	3	0	0	0			0.610998	0.657321	37.6617

## Sheet: E15
Item	Source	Length xyz	Length xy	Height	ND.T	ND.Z	ND.M	Comment		sin theta	angle_radians	angle_degrees
1	e15control_h2bgfp_mtmg_001.nd2	10.08	10.03	1	0	0	0			0.0992063	0.0993698	5.69347
2	e15control_h2bgfp_mtmg_001.nd2	9.84	5.73	8	0	0	0			0.813008	0.9493	54.3909
3	e15control_h2bgfp_mtmg_001.nd2	8.34	5.79	6	0	0	0			0.719424	0.802973	46.007
4	e15control_h2bgfp_mtmg_001.nd2	9.53	9.04	3	0	0	0			0.314795	0.320241	18.3485
5	e15control_h2bgfp_mtmg_001.nd2	9.3	2.36	9	0	0	0			0.967742	1.31611	75.4074
6	e15control_h2bgfp_mtmg_002.nd2	8.55	8.31	2	0	0	0			0.233918	0.236106	13.5279
7	e15control_h2bgfp_mtmg_002.nd2	7.69	7.69	0	0	0	0			0	0	0
8	e15control_h2bgfp_mtmg_002.nd2	7.01	0.31	7	0	0	0			0.998573	1.51738	86.9392
9	e15control_h2bgfp_mtmg_002.nd2	6.16	1.41	6	0	0	0			0.974026	1.34238	76.9126
10	e15control_h2bgfp_mtmg_002.nd2	5.85	4.27	4	0	0	0			0.683761	0.752904	43.1382
11	e15control_h2bgfp_mtmg_003.nd2	7.43	4.39	6	0	0	0			0.807537	0.939964	53.856
12	e15control_h2bgfp_mtmg_003.nd2	6.56	5.83	3	0	0	0			0.457317	0.474976	27.2141
13	e15control_h2bgfp_mtmg_003.nd2	4.58	2.24	4	0	0	0			0.873362	1.06206	60.8518
14	e15control_h2bgfp_mtmg_003.nd2	8.48	5.99	6	0	0	0			0.707547	0.786021	45.0357
15	e15control_h2bgfp_mtmg_003.nd2	6.72	4.48	5	0	0	0			0.744048	0.839108	48.0774
16	e15control_h2bgfp_mtmg_004.nd2	7.02	0.52	7	0	0	0			0.997151	1.49529	85.674
17	e15control_h2bgfp_mtmg_004.nd2	6.93	6.93	0	0	0	0			0	0	0
18	e15control_h2bgfp_mtmg_004.nd2	5.35	3.56	4	0	0	0			0.747664	0.844537	48.3884
19	e15control_h2bgfp_mtmg_005.nd2	8.06	0.98	8	0	0	0			0.992556	1.4487	83.0046
20	e15control_h2bgfp_mtmg_005.nd2	7.24	1.87	7	0	0	0			0.966851	1.3126	75.2062
21	e15control_h2bgfp_mtmg_005.nd2	7	0	7	0	0	0			1	1.5708	90
22	e15control_h2bgfp_mtmg_005.nd2	5.8	4.2	4	0	0	0			0.689655	0.761013	43.6028
23	e15control_h2bgfp_mtmg_006.nd2	8.16	4.19	7	0	0	0			0.857843	1.03106	59.0753
24	e15control_h2bgfp_mtmg_007.nd2	8.2	1.78	8	0	0	0			0.97561	1.34948	77.3196
25	e15control_h2bgfp_mtmg_007.nd2	8.47	7.46	4	0	0	0			0.472255	0.491847	28.1808
26	e15control_h2bgfp_mtmg_007.nd2	7.2	5.18	5	0	0	0			0.694444	0.767648	43.983
27	e15control_h2bgfp_mtmg_007.nd2	10	0	10	0	0	0			1	1.5708	90
28	e15control_h2bgfp_mtmg_008.nd2	10	9.8	2	0	0	0			0.2	0.201358	11.537
29	e15control_h2bgfp_mtmg_008.nd2	9.81	9.76	1	0	0	0			0.101937	0.102114	5.85071
30	e15control_h2bgfp_mtmg_008.nd2	8.33	2.32	8	0	0	0			0.960384	1.28838	73.8186
31	e15control_h2bgfp_mtmg_008.nd2	9.94	7.93	6	0	0	0			0.603622	0.648036	37.1297
32	e15control_h2bgfp_mtmg_008.nd2	10.32	6.53	8	0	0	0			0.775194	0.887022	50.8226
33	e15control_h2bgfp_mtmg_009.nd2	10.69	8.85	6	0	0	0			0.561272	0.595922	34.1438
34	e15control_h2bgfp_mtmg_009.nd2	6.92	3.44	6	0	0	0			0.867052	1.04925	60.1179
35	e15control_h2bgfp_mtmg_010.nd2	9.35	2.53	9	0	0	0			0.962567	1.29632	74.2736
36	e15stretchcontrol_dapi_vangl2_mtmg_survivin.nd2	6.56	0.88	6.5	0	0	0			0.990854	1.43544	82.2448
37	e15stretchcontrol_dapi_vangl2_mtmg_survivin.nd2	5.04	2.27	4.5	0	0	0			0.892857	1.10365	63.2345
38	e15stretchcontrol_dapi_vangl2_mtmg_survivin.nd2	3.35	1.5	3	0	0	0			0.895522	1.1096	63.5756
39	e15stretchcontrol_dapi_vangl2_mtmg_survivin001.nd2	2.5	2.45	0.5	0	0	0			0.2	0.201358	11.537
40	e15stretchcontrol_dapi_vangl2_mtmg_survivin001.nd2	7.51	0.39	7.5	0	0	0			0.998668	1.51919	87.0429
41	e15stretchcontrol_dapi_vangl2_mtmg_survivin002.nd2	6.28	1.87	6	0	0	0			0.955414	1.27106	72.8263
42	e15stretchcontrol_dapi_vangl2_mtmg_survivin002.nd2	2.82	2.78	0.5	0	0	0			0.177305	0.178247	10.2128
43	e15stretchcontrol_dapi_vangl2_mtmg_survivin002.nd2	5.1	3.17	4	0	0	0			0.784314	0.901589	51.6573
44	e15stretchcontrol_dapi_vangl2_mtmg_survivin002.nd2	5.29	2.78	4.5	0	0	0			0.850662	1.01724	58.2837
45	e15stretchcontrol_dapi_vangl2_mtmg_survivin002.nd2	6.04	2.5	5.5	0	0	0			0.910596	1.14472	65.5878
46	e15stretchcontrol_dapi_vangl2_mtmg_survivin003.nd2	3.52	3.48	0.5	0	0	0			0.142045	0.142528	8.16623
47	e15stretchcontrol_dapi_vangl2_mtmg_survivin003.nd2	4.16	2.24	3.5	0	0	0			0.841346	0.999769	57.2825
48	e15stretchcontrol_dapi_vangl2_mtmg_survivin003.nd2	4.85	1.81	4.5	0	0	0			0.927835	1.18857	68.0998
49	e15stretchcontrol_dapi_vangl2_mtmg_survivin003.nd2	3.47	3.44	0.5	0	0	0			0.144092	0.144596	8.28472
50	e15stretchcontrol_dapi_vangl2_mtmg_survivin003.nd2	6.22	1.63	6	0	0	0			0.96463	1.30404	74.7158
51	e15stretchcontrol_dapi_vangl2_mtmg_survivin003.nd2	2.68	2.63	0.5	0	0	0			0.186567	0.187667	10.7525
52	e15stretchcontrol_dapi_vangl2_mtmg_survivin003.nd2	3.38	3.23	1	0	0	0			0.295858	0.300354	17.209
53	e15stretchcontrol_dapi_vangl2_mtmg_survivin003.nd2	3.62	3.29	1.5	0	0	0			0.414365	0.427245	24.4793
54	e15stretchcontrol_dapi_vangl2_mtmg_survivin003.nd2	4.83	2.71	4	0	0	0			0.828157	0.975812	55.9099
55	e15stretchcontrol_dapi_vangl2_mtmg_survivin003.nd2	5.42	2.08	5	0	0	0			0.922509	1.17453	67.2957
56	e15stretchcontrol_dapi_vangl2_mtmg_survivin004.nd2	4.23	1.39	4	0	0	0			0.945626	1.23952	71.019
57	e15stretchcontrol_dapi_vangl2_mtmg_survivin004.nd2	3.68	3.36	1.5	0	0	0			0.407609	0.419834	24.0547
58	e15stretchcontrol_dapi_vangl2_mtmg_survivin004.nd2	4.76	3.23	3.5	0	0	0			0.735294	0.826101	47.3321
59	e15stretchcontrol_dapi_vangl2_mtmg_survivin004.nd2	4.35	3.86	2	0	0	0			0.45977	0.477736	27.3723
60	e15stretchcontrol_dapi_vangl2_mtmg_survivin004.nd2	3.5	3.5	0	0	0	0			0	0	0
61	e15stretchcontrol_dapi_vangl2_mtmg_survivin004.nd2	5.82	4.22	4	0	0	0			0.687285	0.757745	43.4156
Item	Source	Length xyz	Length xy	Height	ND.T	ND.Z	ND.M	Comment		sin theta	angle_radians	angle_degrees
1	e15stretched_h2bgfp_mtmg_001.nd2	8.1	7.85	2	0	0	0			0.246914	0.249494	14.2949
2	e15stretched_h2bgfp_mtmg_001.nd2	6.53	6.53	0	0	0	0			0	0	0
3	e15stretched_h2bgfp_mtmg_001.nd2	7.04	0.73	7	0	0	0			0.994318	1.46415	83.8894
4	e15stretched_h2bgfp_mtmg_001.nd2	8.05	7.8	2	0	0	0			0.248447	0.251077	14.3856
5	e15stretched_h2bgfp_mtmg_002.nd2	7.22	7.15	1	0	0	0			0.138504	0.138951	7.9613
6	e15stretched_h2bgfp_mtmg_002.nd2	9.58	9.37	2	0	0	0			0.208768	0.210315	12.0502
7	e15stretched_h2bgfp_mtmg_002.nd2	11.27	11.23	1	0	0	0			0.0887311	0.088848	5.09061
8	e15stretched_h2bgfp_mtmg_003.nd2	8.64	8.58	1	0	0	0			0.115741	0.116001	6.64635
9	e15stretched_h2bgfp_mtmg_003.nd2	5.94	4.4	4	0	0	0			0.673401	0.738799	42.3301
10	e15stretched_h2bgfp_mtmg_003.nd2	6.63	2.82	6	0	0	0			0.904977	1.13133	64.8202
11	e15stretched_h2bgfp_mtmg_003.nd2	8.26	8.2	1	0	0	0			0.121065	0.121363	6.95359
12	e15stretched_h2bgfp_mtmg_003.nd2	5.29	5.29	0	0	0	0			0	0	0
13	e15stretched_h2bgfp_mtmg_003.nd2	6.31	4.88	4	0	0	0			0.633914	0.686604	39.3395
14	e15stretched_h2bgfp_mtmg_004.nd2	7.49	6.87	3	0	0	0			0.400534	0.4121	23.6116
15	e15stretched_h2bgfp_mtmg_004.nd2	6.38	6.38	0	0	0	0			0	0	0
16	e15stretched_h2bgfp_mtmg_004.nd2	8.56	8.32	2	0	0	0			0.233645	0.235825	13.5118
17	e15stretched_h2bgfp_mtmg_005.nd2	8.34	8.28	1	0	0	0			0.119904	0.120193	6.88657
18	e15stretched_h2bgfp_mtmg_005.nd2	10.44	9.65	4	0	0	0			0.383142	0.393195	22.5284
19	e15stretched_h2bgfp_mtmg_005.nd2	11.51	8.28	8	0	0	0			0.695048	0.768486	44.031
20	e15stretched_h2bgfp_mtmg_005.nd2	7.06	7.06	0	0	0	0			0	0	0
21	e15stretched_h2bgfp_mtmg_005.nd2	6.68	5.97	3	0	0	0			0.449102	0.46576	26.6861
22	e15stretched_h2bgfp_mtmg_006.nd2	5.4	5.3	1	0	0	0			0.185185	0.18626	10.6719
23	e15stretched_h2bgfp_mtmg_007.nd2	5.21	4.81	2	0	0	0			0.383877	0.393992	22.5741
24	e15stretched_h2bgfp_mtmg_007.nd2	9.27	9.21	1	0	0	0			0.107875	0.108085	6.19283
25	e15stretched_h2bgfp_mtmg_008.nd2	8.29	8.22	1	0	0	0			0.120627	0.120922	6.92831
26	e15stretched_h2bgfp_mtmg_008.nd2	6.1	6.02	1	0	0	0			0.163934	0.164678	9.43534
27	e15stretched_h2bgfp_mtmg_008.nd2	8.01	0.31	8	0	0	0			0.998752	1.52082	87.1367
28	e15stretched_h2bgfp_mtmg_008.nd2	7.92	7.92	0	0	0	0			0	0	0
29	e15stretched_h2bgfp_mtmg_009.nd2	7.87	3.61	7	0	0	0			0.889454	1.09615	62.8047
30	e15stretched_h2bgfp_mtmg_009.nd2	8.27	8.02	2	0	0	0			0.241838	0.24426	13.995
31	e15stretched_dapi_vangl2_mtmg_survivin009.nd2	2.95	2.91	0.5	0	0	0			0.169492	0.170314	9.75826
32	e15stretched_dapi_vangl2_mtmg_survivin009.nd2	6.05	0.8	6	0	0	0			0.991736	1.44214	82.6287
33	e15stretched_dapi_vangl2_mtmg_survivin009.nd2	3.29	3.25	0.5	0	0	0			0.151976	0.152567	8.74144
34	e15stretched_dapi_vangl2_mtmg_survivin009.nd2	5.22	1.5	5	0	0	0			0.957854	1.27944	73.3064
35	e15stretched_dapi_vangl2_mtmg_survivin008.nd2	2.34	2.29	0.5	0	0	0			0.213675	0.215336	12.3378
36	e15stretched_dapi_vangl2_mtmg_survivin008.nd2	3.65	3.61	0.5	0	0	0			0.136986	0.137418	7.87349
37	e15stretched_dapi_vangl2_mtmg_survivin008.nd2	2.99	2.99	0	0	0	0			0	0	0
38	e15stretched_dapi_vangl2_mtmg_survivin008.nd2	3.7	3.38	1.5	0	0	0			0.405405	0.417422	23.9165
39	e15stretched_dapi_vangl2_mtmg_survivin008.nd2	4.06	3.77	1.5	0	0	0			0.369458	0.378426	21.6822
40	e15stretched_dapi_vangl2_mtmg_survivin007.nd2	3.9	3.34	2	0	0	0			0.512821	0.538467	30.8519
41	e15stretched_dapi_vangl2_mtmg_survivin006.nd2	3.5	3.36	1	0	0	0			0.285714	0.289752	16.6015
42	e15stretched_dapi_vangl2_mtmg_survivin006.nd2	3.52	3.49	0.5	0	0	0			0.142045	0.142528	8.16623
43	e15stretched_dapi_vangl2_mtmg_survivin006.nd2	3.84	3.53	1.5	0	0	0			0.390625	0.40131	22.9934
44	e15stretched_dapi_vangl2_mtmg_survivin006.nd2	6.31	1.94	6	0	0	0			0.950872	1.25604	71.9658
45	e15stretched_dapi_vangl2_mtmg_survivin005.nd2	5.89	2.12	5.5	0	0	0			0.933786	1.20485	69.0329
46	e15stretched_dapi_vangl2_mtmg_survivin005.nd2	3.66	3.62	0.5	0	0	0			0.136612	0.137041	7.85185
47	e15stretched_dapi_vangl2_mtmg_survivin005.nd2	3.56	3.22	1.5	0	0	0			0.421348	0.434932	24.9197
48	e15stretched_dapi_vangl2_mtmg_survivin005.nd2	3.65	3.61	0.5	0	0	0			0.136986	0.137418	7.87349
49	e15stretched_dapi_vangl2_mtmg_survivin005.nd2	3.11	3.07	0.5	0	0	0			0.160772	0.161472	9.25169
50	e15stretched_dapi_vangl2_mtmg_survivin005.nd2	6.45	2.36	6	0	0	0			0.930233	1.19505	68.4711
