# Supplementary material for: Epithelial geometry regulates spindle orientation and progenitor fate during formation of the mammalian epidermis
Source: eLife journal article supplement (doi:10.7554/elife.47102), 2019-06-12
Supplement: supp [file Fig1_FromPrism.xlsx]

## Sheet: 1E
	Wildtype			Looptail
planar	54.12	39.04	59.15	19.36	30.13	30.73
oblique	35.29	45.89	35.21	62.9	63.46	48.78
perpendicular	10.59	15.07	5.63	17.74	6.41	20.49
Parameter
Table Analyzed	planar			Parameter				Parameter
Column A	Wildtype			Table Analyzed	oblique			Table Analyzed	perpendicular
vs	vs			Column A	Wildtype			Column A	Wildtype
Column B	Looptail			vs	vs			vs	vs
				Column B	Looptail			Column B	Looptail
Unpaired t test
P value	0.0274			Unpaired t test				Unpaired t test
P value summary	*			P value	0.0305			P value	0.4266
Are means signif. different? (P < 0.05)	Yes			P value summary	*			P value summary	ns
One- or two-tailed P value?	Two-tailed			Are means signif. different? (P < 0.05)	Yes			Are means signif. different? (P < 0.05)	No
t, df	t=3.394 df=4			One- or two-tailed P value?	Two-tailed			One- or two-tailed P value?	Two-tailed
				t, df	t=3.280 df=4			t, df	t=0.8841 df=4
How big is the difference?
Mean ± SEM of column A	50.77 ± 6.042 N=3			How big is the difference?				How big is the difference?
Mean ± SEM of column B	26.74 ± 3.693 N=3			Mean ± SEM of column A	38.80 ± 3.547 N=3			Mean ± SEM of column A	10.42 ± 2.735 N=3
Difference between means	24.03 ± 7.081			Mean ± SEM of column B	58.38 ± 4.803 N=3			Mean ± SEM of column B	14.91 ± 4.279 N=3
95% confidence interval	4.376 to 43.69			Difference between means	-19.58 ± 5.970			Difference between means	-4.490 ± 5.079
R square	0.7423			95% confidence interval	-36.16 to -3.010			95% confidence interval	-18.59 to 9.608
				R square	0.729			R square	0.1635
F test to compare variances
F,DFn, Dfd	2.677, 2, 2			F test to compare variances				F test to compare variances
P value	0.5439			F,DFn, Dfd	1.834, 2, 2			F,DFn, Dfd	2.448, 2, 2
P value summary	ns			P value	0.7058			P value	0.5801
Are variances significantly different?	No			P value summary	ns			P value summary	ns
				Are variances significantly different?	No			Are variances significantly different?	No
