# Supplementary material for: Epithelial geometry regulates spindle orientation and progenitor fate during formation of the mammalian epidermis
Source: eLife journal article supplement (doi:10.7554/elife.47102), 2019-06-12
Supplement: supp [file Fig2_FromPrism.xlsx]

## Sheet: 2A
symmetric	asymmetric
0	5.799
0	6.294
0	7.125
0	7.169
0	15.651
0	15.903
0	18.292
0	19.001
0	19.636
0	21.136
0	22.649
0	23.475
0	24.742
0	26.634
0	30.294
0	30.918
0	34.212
0	34.981
0	35.576
0	35.691
0	37.567
0	39.132
0	39.156
0	39.705
0	39.712
0	39.712
0	39.998
0	40.488
0	40.742
0	41.364
0	41.818
0	42.237
0	43.14
0	43.14
0	43.293
0	44.443
0	44.857
0	45.041
0	45.992
0	46.503
0	47.056
0	47.077
0	48.194
0	48.545
0	48.535
0	48.855
0	48.855
0	49.257
0	49.267
0	49.802
0	49.886
0	50.714
4.844	50.887
5.077	51.219
5.121	51.641
5.301	52.703
5.303	52.869
5.389	52.869
5.463	53.039
5.513	53.531
5.559	53.858
5.562	54.085
5.576	54.138
5.587	54.152
5.63	54.152
5.643	55.249
5.663	55.297
5.724	57.041
5.78	57.101
5.852	57.291
5.882	57.559
6.07	57.687
6.079	58.162
6.096	58.931
6.221	58.966
6.223	58.978
6.228	59.015
6.277	59.972
6.279	60.175
6.363	60.209
6.449	60.209
6.462	60.263
6.536	60.342
6.664	60.454
6.696	60.679
6.714	61.126
6.757	61.126
6.757	61.189
6.765	61.189
6.765	61.245
6.793	61.828
6.827	62.45
6.968	62.922
6.993	62.922
7.014	63.575
7.138	63.802
7.178	64.226
7.328	64.243
7.39	64.266
7.417	64.274
7.431	64.87
7.431	65.572
7.438	65.653
7.612	65.713
7.625	65.84
7.875	65.909
7.875	66.171
0.927	66.26
7.943	66.346
7.943	66.678
7.992	66.786
8.118	66.797
8.125	67.566
8.142	67.717
8.6	67.717
9.08	67.755
9.816	68.089
10.462	68.632
10.465	68.893
10.594	69.2
10.675	69.472
10.695	70.012
10.699	70.117
10.72	70.138
10.76	70.15
10.837	70.264
11.063	70.616
11.071	70.823
11.256	71.002
11.414	71.002
11.455	71.325
11.605	71.673
11.695	71.673
11.762	71.673
12.024	71.673
12.13	72.169
12.298	72.198
12.484	72.212
12.596	72.568
12.707	78.235
12.975	73.235
13.209	73.593
13.371	73.593
13.579	73.593
14.076	73.828
14.542	73.881
14.56	74.03
14.65	74.117
14.787	74.89
14.989	75.009
14.996	75.009
15.046	75.158
15.186	75.158
15.209	75.612
15.338	76.437
14.479	76.444
15.607	77.757
16.057	77.757
16.341	77.897
16.648	78.297
16.884	78.59
16.999	78.84
17.072	79.076
17.141	79.131
17.235	79.365
17.286	79.393
17.332	79.796
17.365	79.796
17.556	80.048
17.558	80.048
17.73	80.848
18.302	82.007
18.608	82.405
19.066	83.101
19.221	83.157
19.565	83.157
19.998	83.774
20.315	83.849
20.651	83.911
20.679	84.242
21.567	84.516
21.907	84.857
23.124	85.012
23.59	85.426
23.614	86.203
23.994	86.566
24.054	86.947
24.827	86.947
25.358	88.282
25.95	88.472
26.425	88.625
26.709	88.625
27.39	90
27.884	90
28.04	90
28.376	90
28.628	90
28.654	49.039
28.954
29.142
29.239
29.364
30.041
30.643
30.673
30.688
30.835
30.888
31.303
32.167
32.173
33.619
34.666
34.943
35.343
36.776
37.695
37.89
37.992
38.478
38.637
38.845
39.176
39.688
40.151
40.642
40.682
41.514
42.016
42.371
42.371
42.665
43.501
43.661
44.013
44.696
45.041
45.142
45.913
45.977
47.507
49.825
50.863
50.863
51.092
51.224
55.272
55.505
55.654
56.476
56.804
63.029
64.494
66.786
76.437
83.063
85.426
86.566
88.75
6.572

## Sheet: 2B
symmetric	asymmetric
0	7.108
0	7.845
0	12.252
0	13.197
0	15.023
0	15.547
0	15.568
0	16.645
0	18.122
0	19.081
0	19.753
5.049	20.854
5.21	20.972
5.367	21.251
5.574	21.533
5.946	22.393
6.066	23.049
6.102	23.07
6.122	23.962
6.383	23.971
6.391	24.044
6.437	24.842
6.911	27.604
7.085	29.676
7.108	32.412
8.13	32.562
8.811	32.57
10.588	33.381
10.758	33.677
11.005	35.059
11.219	35.097
11.401	35.313
11.87	36.012
12.137	36.293
12.869	36.529
13.291	36.529
14.294	36.529
14.67	40.14
16.517	40.25
16.645	41.862
18.283	41.98
18.497	42.274
18.902	44.081
21.031	44.098
24.1	44.267
24.411	44.409
24.76	45
24.767	45.096
26.281	46.469
27.011	46.668
29.695	48.013
31.218	49.635
32.848	51.34
39.314	51.34
47.128	51.44
53.604	51.633
56.842	51.78
64.079	52.352
72.083	52.401
73.301	53.222
75.56	54.152
84.938	55.895
27.569	56.842
7.665	57.105
5.857	58.201
5.97	59.3
39.168	59.672
0	59.954
36.413	60.42
44.098	61.52
7.093	61.52
22.602	62.761
10.178	63.665
25.115	65.328
0	68.595
6.156	68.819
	69.154
	71.051
	71.35
	71.415
	71.479
	71.897
	72.198
	73.881
	74.997
	76.209
	77.32
	79.611
	80.422
	80.422
	80.631
	81.189
	82.155
	82.213
	83.003
	84.289
	84.289
	84.731
	86.452
	87.138
	90
	70.138
	46.715
	86.995
	78.277
	77.211
	54.829
	75.493
	70.138
	80.403
	83.586
	83.471
	85.568
	64.075
	59.087
	52.507
	71.897
	66.381
	52.612
	21.602
	64.307
	72.347
	11.884
	86.566
	70.275
	48.109
	49.467
	31.845
	40.137

## Sheet: 2C
	Symmetric	Asymmetric
planar wt	94	6
planar lp	78	22
oblique wt	41	59
oblique lp	21	79
perpendicular wt	11	89
perpendicular lp	6	94

## Sheet: 2D
	Wildtype			Looptail
Symmetric	67.06	57.53	63.93	42.42	16.13	33.33
Asymmetric	32.94	42.47	36.07	57.58	83.87	66.67
Parameter
Table Analyzed	symmetric
Column A	Wildtype
vs	vs
Column B	Looptail
Unpaired t test
P value	0.0171
P value summary	*
Are means signif. different? (P < 0.05)	Yes
One- or two-tailed P value?	Two-tailed
t, df	t=3.927 df=4
How big is the difference?
Mean ± SEM of column A	62.84 ± 2.805 N=3
Mean ± SEM of column B	30.63 ± 7.709 N=3
Difference between means	32.21 ± 8.203
95% confidence interval	9.442 to 54.98
R square	0.794
F test to compare variances
F,DFn, Dfd	7.555, 2, 2
P value	0.2338
P value summary	ns
Are variances significantly different?	No

## Sheet: 2F
Wildtype	Looptail
49.21	64.98			Parameter
59.38	69.68			Table Analyzed	e18.5 Skin Thickness
55.95	69.74			Column A	Wildtype
				vs	vs
				Column B	Looptail
				Unpaired t test
				P value	0.0171
				P value summary	*
				Are means signif. different? (P < 0.05)	Yes
				One- or two-tailed P value?	Two-tailed
				t, df	t=3.934 df=4
				How big is the difference?
				Mean ± SEM of column A	54.85 ± 2.987 N=3
				Mean ± SEM of column B	68.13 ± 1.577 N=3
				Difference between means	-13.29 ± 3.378
				95% confidence interval	-22.66 to -3.910
				R square	0.7946
				F test to compare variances
				F,DFn, Dfd	3.589, 2, 2
				P value	0.4358
				P value summary	ns
				Are variances significantly different?	No

## Sheet: 2H
E14 WT	E14 Lp	E15 WT	E15 V2Tm	E16 WT	E16 Lp
12.97	14.75	22.99	25.49	28.03	42.39
13.15	14.64	22.47	25.25	29.13	41.46
12.98	14.57	21.88	25.26	28.23	41.32
14.43	14.58	23.82	26.9	29.8	39.39
14.07	14.57	24.2	27.02	27.67	40.32
14.86	14.96	24.39	27.58	29.46	38.56
15.13	15.26	24.56	25.9	27.81	36.82
15.19	15.69	24.18	26.84	29.78	38.1
15.62	14.57	23.97	26.31	31.61	38.7
14.79	16.35	23.2	25.47	27.4	36.26
15.87	15.19	23.16	25.24	29.26	35.71
15.54	16.15	23.99	27.4	27.09	34
17.17	14.81	23.11	22.6	28.65	38.74
17.01	15.06	22.11	22.93	28.58	37.45
15.94	16.27	23.19	22.01	31.09	37.8
16.05	13.11	22.37	25.3	31.49	41.53
17.27	14.27	23.87	25.67	32.06	36.94
15.65	14.47	24.8	23.98	28.84	37.19
19.25	18.88	25.34	24.94	30.66	36.97
18.88	17.41	24.01	24.88	30	39.56
18	17.32	24.73	24.44	30.29	40.5
16.04	15.64	24.86	27.6	31.69	39.46
16.35	16.31	23.9	24.95	32.28	38.68
17.03	15.56	23.98	24.88	30.75	37.24
14.21	16.55	23.62	23.54	29.86	38.58
14.13	17.12	24.25	25.13	29.5	37.72
14.25	17.37	24.01	23.56	31.82	36.83
15.35	16.52	25.77	27.54	30.7	34.95
16.77	16.78	26.55	25.47	29.16	34.85
16.29	14.59	26.38	25.1	30.37	34.26
