# Supplementary material for: Epithelial geometry regulates spindle orientation and progenitor fate during formation of the mammalian epidermis
Source: eLife journal article supplement (doi:10.7554/elife.47102), 2019-06-12
Supplement: supp [file Fig3_FromPrism.xlsx]

## Sheet: 3B
	apical	lateral	diffuse	nothing	mislocalized
planar		14	8	61	17

## Sheet: 3D
	Apical	Lateral	Diffuse	Nothing	Mislocalized
Wildtype	41	6	7	37	8
Vangl2	48	8	1	40	2
