# Supplementary material for: Epithelial geometry regulates spindle orientation and progenitor fate during formation of the mammalian epidermis
Source: eLife journal article supplement (doi:10.7554/elife.47102), 2019-06-12
Supplement: supp [file Fig4_FromPrism.xlsx]

## Sheet: 4B
WT	Lp			Statistics
123.25	70.86			Parameter
106.32	97.39			Table Analyzed	E14FloodArea
88.1	92.75			Column A	WT
144.65	85.52			vs	vs
116.65	94.42			Column B	Lp
120.88	75.27
100.84	95.83			Unpaired t test
138.7	116.9			P value	0.0057
139.5	109.61			P value summary	**
116.42	117.87			Are means signif. different? (P < 0.05)	Yes
				One- or two-tailed P value?	Two-tailed
				t, df	t=3.134 df=18
				How big is the difference?
				Mean ± SEM of column A	119.5 ± 5.718 N=10
				Mean ± SEM of column B	95.64 ± 5.039 N=10
				Difference between means	23.89 ± 7.622
				95% confidence interval	7.876 to 39.90
				R square	0.3531
				F test to compare variances
				F,DFn, Dfd	1.287, 9, 9
				P value	0.7128
				P value summary	ns
				Are variances significantly different?	No

## Sheet: 4C
WT	Lp			Statistics
8.5	9			Parameter
9.5	8.5			Table Analyzed	E14CellHeights
9	10			Column A	WT
8	10.5			vs	vs
7	9.5			Column B	Lp
7	8.5
7.5	10			Unpaired t test
7.5	10			P value	< 0.0001
8.5	10			P value summary	***
7.5	10			Are means signif. different? (P < 0.05)	Yes
8	9			One- or two-tailed P value?	Two-tailed
7	10.5			t, df	t=16.18 df=598
6.5	11.5
7.5	11			How big is the difference?
7.5	11.5			Mean ± SEM of column A	7.903 ± 0.05463 N=300
9	10			Mean ± SEM of column B	9.273 ± 0.06471 N=300
10.5	9.5			Difference between means	-1.370 ± 0.08468
8.5	7.5			95% confidence interval	-1.536 to -1.204
7.5	10			R square	0.3044
9	11
7.5	10			F test to compare variances
9	8.5			F,DFn, Dfd	1.403, 299, 299
9.5	8			P value	0.0035
7.5	8.5			P value summary	**
10.5	8.5			Are variances significantly different?	Yes
7.5	8
7	9
9	10.5
7	9.5
7	9.5
7.5	8.5
7.5	8
7	9
7.5	8
10	10.5
8.5	8.5
7.5	10
10	9
7.5	6
8	9
8.5	8.5
8	10.5
7	10.5
9	12
8.5	11
7.5	9
9	8
8	8
8	7.5
8	8.5
9	9.5
8	10
8.5	8.5
8.5	7.5
9.5	9
8	9.5
8.5	7
8.5	9.5
11	7.5
9.5	10.5
8	10
9	12.5
9	11
8	9
9.5	9
10	9.5
7.5	8
8.5	8.5
9	10.5
9	12
8.5	9
7.5	12
9	10
9	11.5
8	11
9	9
8	10
9.5	9
7.5	9.5
8	8
9.5	10.5
9.5	8.5
7	9
7.5	10
9.5	9
9.5	10.5
8	8.5
10	9
8.5	10
9	9.5
7.5	9.5
7	9
8	9
8	10.5
9	9
9	9.5
9.5	8
8	9.5
7	10.5
8.5	11
8	10
7.5	9
9.5	7.5
8	8.5
7	9.5
8	8.5
8	9.5
8	7.5
8	10
8	8.5
7	11.5
8.5	8
7	10.5
9	8.5
9	10
7.5	8.5
7	9
7.5	12
9	10
8	8.5
6.5	11
7	11.5
6.5	9.5
7	11
7.5	8.5
6.5	9.5
7	9.5
6.5	9
6.5	8.5
7.5	8
6.5	10
8.5	9
7	12
6	9.5
7.5	10.5
6.5	8
8.5	9.5
7.5	10
7	9
7.5	10
7	8.5
7	9.5
8	8
8	8
8	9
7	9
7	9.5
7	8
6	9.5
6.5	9
6.5	9
7	11
8.5	10
6.5	9.5
6.5	8.5
6	10.5
6.5	10.5
6.5	8
7	8
7	10
6.5	10.5
7	11
7	9
7.5	9
6.5	9.5
6.5	11.5
6.5	10
6.5	8.5
7	9
8	10
7.5	11
6.5	8
7.5	9.5
8	9
6.5	8.5
6.5	9
8	10
8.5	9
9	9.5
8	7
9	10.5
8	10
7.5	9.5
8.5	9
9	10.5
8	10.5
9	10
8	10.5
8	8.5
8	9.5
8.5	10
8	9.5
7.5	10
8	11.5
8	9.5
7	10.5
7	10
8.5	8.5
6	10
7	10
7	8.5
5.5	7.5
8	9
6.5	12
8.5	10
7	10.5
7.5	9
8.5	10
7	10
8	12.5
8.5	9.5
8.5	9
7.5	8.5
8.5	10
8	8.5
8	7
9	9
7.5	9.5
8.5	10.5
8	8
7.5	11
10	9
8.5	9
8.5	10
8	7.5
8.5	8
8.5	8.5
9	10.5
7.5	8
7.5	7
8	8.5
10.5	7.5
7	9
9	9
7.5	9.5
9	8.5
7.5	9
7.5	8
8.5	9.5
8	8.5
7.5	9.5
8.5	10.5
7	7.5
8.5	10.5
9.5	9.5
8	8.5
6.5	9
7.5	9.5
7	9.5
8	10
8	8.5
7.5	7
8.5	8.5
9.5	7.5
8.5	8
9.5	8.5
7	7.5
7	8.5
7	8
7.5	8
7.5	9
7.5	9.5
7.5	8
8	8
8.5	8.5
8.5	9.5
7.5	8.5
7.5	9.5
8	10
8.5	8.5
8.5	7
9	8.5
8	9
9	8.5
8	9
7.5	10
8.5	8.5
7.5	9.5
7.5	8
8.5	9
7.5	9.5
7.5	10.5
8	9.5
7	10
8.5	8.5
7.5	9.5
7	8
8.5	7.5
7.5	7.5
7	9
7.5	9
8.5	8.5
9	7.5
6.5	8.5
8	9
6.5	9
8	8
8	9.5
6	8
8	8.5

## Sheet: 4D
	Wildtype										Looptail
4	9.09	11.04	14.14	10.22	12.2	11.81	12.58	9.7	8.21	9.89	11.61	7.62	12.63	8.94	14.85	8.76	12.37	10.01	12.89	9.87
5	30.07	30.52	24.08	24.09	27.44	30.71	29.56	27.61	29.1	25.82	24.85	24.29	29.8	35.2	23.76	28.87	29.03	28.04	25.77	24.46
6	31.47	36.36	32.46	35.04	30.49	32.28	31.45	36.57	35.07	37.36	30.77	42.86	30.3	32.4	34.16	36.6	32.26	32.8	34.54	36.41
7	21.68	15.58	20.42	19.71	22.56	15.75	18.87	17.91	21.64	19.78	19.53	17.62	18.69	17.88	15.84	16.49	19.35	17.99	17.53	21.2
8	5.59	5.84	6.28	4.38	4.27	7.87	6.92	6.72	2.99	5.49	8.28	5.24	6.06	5.03	9.41	6.7	5.91	6.88	6.19	5.98

## Sheet: 4E
Wildtype	Looptail
204	244
233	277
263	259
189	253
224	273
185	261
217	251
194	254
195	261
245	250
Statistics
Parameter
Table Analyzed	E14CellDensity
Column A	Wildtype
vs	vs
Column B	Looptail
Unpaired t test
P value	0.0001
P value summary	***
Are means signif. different? (P < 0.05)	Yes
One- or two-tailed P value?	Two-tailed
t, df	t=4.885 df=18
How big is the difference?
Mean ± SEM of column A	214.9 ± 8.267 N=10
Mean ± SEM of column B	258.3 ± 3.256 N=10
Difference between means	-43.40 ± 8.885
95% confidence interval	-62.07 to -24.73
R square	0.57
F test to compare variances
F,DFn, Dfd	6.447, 9, 9
P value	0.0105
P value summary	*
Are variances significantly different?	Yes

## Sheet: 4F
WT	Lp e14			Statistics
2.94	4.1			Parameter
5.58	2.53			Table Analyzed	E14ProliferationRate
1.9	2.7			Column A	WT
6.35	2.37			vs	vs
1.79	2.2			Column B	Lp e14
1.62	4.98
3.69	3.59			Unpaired t test
4.12	3.54			P value	0.9987
2.56	4.6			P value summary	ns
2.45	2.4			Are means signif. different? (P < 0.05)	No
				One- or two-tailed P value?	Two-tailed
				t, df	t=0.001653 df=18
				How big is the difference?
				Mean ± SEM of column A	3.300 ± 0.5141 N=10
				Mean ± SEM of column B	3.301 ± 0.3185 N=10
				Difference between means	-0.0009999 ± 0.6048
				95% confidence interval	-1.272 to 1.270
				R square	1.519e-07
				F test to compare variances
				F,DFn, Dfd	2.605, 9, 9
				P value	0.17
				P value summary	ns
				Are variances significantly different?	No

## Sheet: 4I
planar	oblique	perp			Statistics
0.935551	0.940439	1.06516			Parameter
0.834151	1.25858	1.38018			Table Analyzed	E14 WT only
0.851064	1.18243	1.38282
0.821509	1.00418	1.15712			One-way analysis of variance
0.416667	0.912779	1.18906			P value	< 0.0001
1.13147	0.68306	1.47472			P value summary	***
0.481762	1.07422				Are means signif. different? (P < 0.05)	Yes
0.576923	1.11702				Number of groups	3
0.736568	1.20057				F	19.9
0.893855	1.06809				R square	0.3658
0.778689	1.40751
0.846561	0.724638				Bartlett's test for equal variances
0.948367	0.914634				Bartlett's statistic (corrected)	2.643
0.837989	0.960659				P value	0.2668
0.673149	1.02439				P value summary	ns
0.978723	1.2318				Do the variances differ signif. (P < 0.05)	No
0.742768	1.55827
1.19681	0.963303				ANOVA Table	SS	df	MS
0.614887	0.899621				Treatment (between columns)	1.58	2	0.7899
1.07323	0.855513				Residual (within columns)	2.739	69	0.03969
0.839695	1.07459				Total	4.319	71
0.789037	0.862069
0.598802	1.66667				Tukey's Multiple Comparison Test	Mean Diff.	q	Significant? P < 0.05?	Summary	95% CI of diff
0.696379	1.11235				planar vs oblique	-0.24	6.657	Yes	***	-0.3623 to -0.1177
0.829016					planar vs perp	-0.4441	7.223	Yes	***	-0.6527 to -0.2355
1.00524					oblique vs perp	-0.2041	3.174	No	ns	-0.4223 to 0.01402
0.810295
0.78125
0.702663
0.892857
0.92827
0.572363
1.3076
0.734619
0.755396
0.973236
0.957535
0.810811
0.739645
0.862069
0.888681
1.0451

## Sheet: 4J
Planar	Oblique	Perpendicular			Statistics
0.738108	1.69837	1.61725			Parameter
1.02273	1.32318	1.46056			Table Analyzed	E14 Lp
0.977047	1.08696	1.4761
0.902579	0.808868	1.25			One-way analysis of variance
1.26156	1.46684	1.53918			P value	< 0.0001
0.99734	1.42405	1.17507			P value summary	***
0.865385	1.22427	1.09409			Are means signif. different? (P < 0.05)	Yes
1.02896	0.893977	2.07226			Number of groups	3
0.929368	0.773196	1.40735			F	14.46
0.739988	0.858008	1.41047			R square	0.3146
0.870902	0.630252	1.30208
1	0.925926	1.44231			Bartlett's test for equal variances
0.903614	1.13722	1.57618			Bartlett's statistic (corrected)	3.605
0.959302	1.08902	1.39104			P value	0.1649
0.986842	0.831389	1.01215			P value summary	ns
0.635593	1.12551	1.1811			Do the variances differ signif. (P < 0.05)	No
1.25	1.2	1.12232
1.21479	1.33701	1.2766			ANOVA Table	SS	df	MS
	1.39476				Treatment (between columns)	1.574	2	0.7868
	1.6129				Residual (within columns)	3.429	63	0.05442
	1.0846				Total	5.002	65
	1.07352
	1.23913				Tukey's Multiple Comparison Test	Mean Diff.	q	Significant? P < 0.05?	Summary	95% CI of diff
	1.28006				Planar vs Oblique	-0.2198	4.469	Yes	**	-0.3869 to -0.05274
	1.07991				Planar vs Perpendicular	-0.4179	7.6	Yes	***	-0.6047 to -0.2311
	1.4508				Oblique vs Perpendicular	-0.1981	4.028	Yes	*	-0.3651 to -0.03103
	1.26825
	1.41026
	1.41403
	1.25858
