# Supplementary material for: Epithelial geometry regulates spindle orientation and progenitor fate during formation of the mammalian epidermis
Source: eLife journal article supplement (doi:10.7554/elife.47102), 2019-06-12
Supplement: supp [file Fig4Supp1_FromPrism.xlsx]

## Sheet: 4S1B
Wildtype	Looptail
167.29	118.96
140.26	130.01
145.27	106.38
160.94	131.47
167.84	136.32
165.95	133.27
147.67	148.51
143.14	130.11
172	116.32
186.71	135
188.93	125.78
150.92	137.07

## Sheet: 4S1C
Wildtype	Looptail
7	9.5
6.5	8
6	7.5
7	7
7.5	8.5
7	7.5
5.5	7
6.5	8.5
7	6.5
7	8
5.5	7.5
8	8.5
7	6.5
7	8.5
7.5	7
8	8
9.5	8.5
7	7.5
6	7.5
6.5	8.5
7.5	8
7.5	8.5
7	8.5
5.5	8
6.5	6
9.5	9
6.5	7
7	7.5
7.5	8.5
6	7.5
6	6
6	7
6.5	6.5
7	7
8.5	7
8	8
7	7
6.5	9.5
7.5	9.5
7.5	9
8.5	8
8	7.5
7.5	7.5
6.5	7.5
6.5	6
7	6.5
6.5	7
6.5	6.5
7.5	7.5
6.5	7.5
6.5	6
6	5.5
8.5	5.5
8	7.5
9	8
8	8
6	6.5
6.5	6.5
7.5	6.5
9	8.5
7.5	7
8	6.5
6	7.5
7.5	8.5
7.5	7.5
8	8
7.5	8
8.5	7.5
8.5	8
7.5	9
6.5	8
7	6
6	8
6	8
6.5	8
8	8
7.5	7.5
9.5	6
6	8
7	8
8.5	8
7	7.5
7	7.5
7.5	6.5
7	8
10	7
5.5	7
8	7.5
9.5	7.5
9	7.5
8	7.5
7	8.5
5.5	7.5
6.5	7.5
7.5	7.5
6	7.5
6.5	8.5
5.5	6.5
6	6.5
8.5	6
6.5	6.5
7	7.5
6	7.5
6	7.5
7	6.5
4.5	8
7	5.5
6	8
6	8
6	8
7.5	8
6.5	7.5
4.5	7
7.5	9
6	7.5
6.5	8
6.5	8.5
7	7
5.5	6.5
7	7.5
6.5	8.5
7.5	7.5
6	8.5
7	8
5.5	6.5
7	8
6	7.5
6	7.5
6	8.5
6.5	8
7	7
7	8.5
7.5	9
7	10
7	9
7	9
6.5	9
6	9
6.5	8.5
5.5	9.5
5.5	8.5
5.5	8
6	8
7	9
6	8.5
7.5	9
7	9.5
6.5	9.5
6.5	9
6.5	8
7	9.5
5	8
7	8.5
5.5	7.5
6	8
7.5	8.5
6.5	7
7.5	8
5.5	7.5
6	8
6.5	9
6.5	7.5
7.5	8.5
5.5	7.5
6	5.5
5.5	6.5
5.5	7.5
5.5	7.5
7.5	11
7	8.5
6.5	7
6	8
5.5	8
5	8.5
6.5	7.5
7	8
5.5	9
8	8
6.5	8
5.5	8.5
5.5	6.5
7.5	6
7.5	6.5
6.5	7.5
6.5	7
6.5	6
6	8.5
6	7
6.5	6.5
7	6.5
6.5	4
5.5	7
6	6
6	6
6.5	7.5
6.5	6.5
6	8
6	7
8	7.5
6.5	7.5
5.5	7
7	7.5
7	9
7	7
6.5	7
6.5	6.5
7.5	5.5
6	6.5
6	9
6	8.5
7	7
8	6.5
7	6
6.5	6.5
6.5	6.5
6.5	7.5
7.5	6
7.5	7.5
7	6.5
7	6.5
6.5	7
5.5	7
6.5	9
6.5	6.5
6.5	7
7	9
8.5	7
7.5	8.5
7	8
7	7.5
6	8
6.5	6.5
7	7
6.5	7
6.5	7.5
6	7
5	7
6	8
6.5	6.5
6.5	7.5
8.5	7.5
7.5	7.5
7	6.5
8	7.5
6.5	6.5
6.5	7
7.5	7.5
8	7
7.5	7
6.5	7.5
6.5	8.5
7.5	6
6	7
5.5	7.5
6.5	8.5
8	7.5
7.5	6.5
6.5	7
7	9.5
7	8
7	7.5
7.5	7.5
6.5	7
7	7.5
7.5	7
7	6.5
8.5	8
7.5	7.5
7.5	7
7	7
6.5	6.5
7.5	5.5
6	5.5
6.5	6
7.5	6.5
6.5	7.5
7	7
7.5	7.5
8	7.5
9	7
10	7
7.5	7.5
8.5	7.5
7	6.5
7	6
6.5	8.5
7.5	6
7	6
7	6
7	5.5
8.5	7.5
6	7
6.5	7.5
6	6.5
7.5	8
8	8
6.5	8
7.5	6
6	6.5
7.5	6.5
9.5	7
7.5	7
6.5	7
7.5	7.5
6	8.5
6.5	8.5
7	7.5
7	9.5
7.5	8.5
6.5	7.5
7	7
6	8.5
7.5	8.5
8	8.5
8	9
8	7
7.5	10
6.5	8.5
6.5	7.5
7	8
9	11
8	8
8	8
6	8.5
6.5	8.5
7.5	9
7.5	9
6.5	9
8	7.5
7	7.5
7	7
8	8
7	8
7.5	11
7.5	10
6	7.5
7.5	8
7	9
8.5	7.5
7.5	7.5
7.5	9
7.5	8
6.5	7.5
6.5	7
7	8
6.5	7
8	8.5
7	8
7.5	6.5
6.5	7.5
7.5	7.5
7.5	8
6.5	9
6.5	9
6	7.5
7	7.5
7	8
7.5	6.5
7.5	8
8	7.5
7.5	7
8.5	6.5
10	6
7.5	7
7	9
7	8.5
6	7
6	7
5.5	7.5
5	7.5
6	6
6	8
7	7
6.5	7.5
8	7
5.5	8
5	7.5
5	7.5
6	6.5
5.5	8
6	7.5
6.5	8.5
6.5	7
7.5	7.5
6	9
6.5	8.5
5.5	8.5
6	7.5
7	7
6.5	7.5
6.5	8
7	7
7	9
7	8
6.5	8.5
6.5	8
5.5	9.5
5	8
6	7
6.5	7.5
6.5	7.5
6	7.5
5.5	7.5
6	7.5
5.5	8.5
5	7.5
4.5	8.5
7	7.5
6.5	7
5	6
5	6.5
6.5	7.5
8.5	8
8	7.5
6.5	6.5
6.5	7.5
5.5	7.5
6.5	7.5
7	8
6	7.5
7.5	8.5
6	7
6	6.5
5.5	6
6	6.5
6.5	6.5
5	8
5.5	6
8	6.5
6	7.5
7.5	7
7	8
6.5	7
4.5	6.5
5	7.5
6	7.5
6	7
6	7
6.5	7
7	8
6.5	8.5
7.5	8
6.5	8
7	7
7.5	8
6	8.5
7	7
6	7
5	7
7	7.5
7	7.5
8	8.5
5	8
6	8
5.5	9
6	7.5
7	8
7	8.5
7	7.5
7.5	7
7	7.5
4.5	7.5
6.5	8
5	8.5
6	7.5
5	8
5	7.5
5	7.5
6.5	7.5
5.5	7.5
6.5	8
6	7
5	6.5
6	7.5
6.5	7
6.5	9
7	8.5
6	7
5.5	6.5
6	6.5
6
6.5
5.5
7
6.5
6.5
6.5
6
6.5
5
5.5
5
5.5
5.5
4.5
6
6
6.5
5.5
5.5
5
5
5
6
6.5
6.5
5.5
6.5
5.5
7.5
7
6.5
5.5
6
5
6.5
7
7.5
6.5
8
7.5
6.5
6
6
6
6
6
5.5
5.5
5
6.5
6
5
5.5
6
5.5
5.5
5.5
5.5
5
6
6
5.5
6.5
6.5
5.5
6.5
7
6.5
5.5
6
6.5
4.5
6
5.5
6
6.5
5.5
5.5
6.5
5.5
6
6.5
6
6
7.5
6
6
6.5
7
7
6
7
5.5
6
5.5
6.5
6
5
5.5
6.5
5
4.5
5
5.5
7
6.5
5.5
5.5
6.5
5
6
6
6.5
5.5
5
5
5.5
5
5.5
5
4.5
6
5
4.5
6.5
6
6.5
6.5
9
7
7.5
5.5
7
7.5
6.5
6.5
6
7
7
7.5
8
6.5
7
8.5
8
8.5
8.5
8
8
8
7.5
9
6.5
7.5
7
8
6.5
7.5
8
8.5
8
8
7
7
8.5
7
7.5
8
8
8.5
7.5
7.5
6
6.5
8
8
6.5
6.5
7.5
7.5
7.5
8.5
8
7.5
7.5
8.5
5.5
5
6
7
7.5
8.5
7.5
7
6
7
7.5
6
6.5
5
8
7.5
7
6.5
6
7
7
6
7
7
6
6.5
7
7
6.5
6.5
7
7
7.5
5.5
6.5
7.5
7
6
6.5
7.5
7
6.5
6.5
6
7
6.5
8
7.5
7
7.5
7.5
7
8.5
7
5
6
6.5
7
7
7.5

## Sheet: 4S1D
	Wildtype												Looptail
4	11.9	15.4	12.6	13.6	16.2	15.5	8	15.7	12.2	9.4	10.6	15.3	12.2	14.9	6.8	9.7	14.2	13.1	14.6	11.3	11.6	10.3	5.7	10.5
5	28.8	28.5	27.7	29.8	24.3	26.2	31	29.5	29.8	29.8	28.2	25.1	29.3	22.7	33.9	28.4	27	26.1	27.7	28	36.6	23.4	35.7	30.8
6	39	30.3	34.5	30.9	31.8	26.2	39.9	27.6	29.3	31	34.1	33.5	37.8	33.8	31.3	36.8	36.9	30.7	30.7	28.7	33.1	37.2	26.1	34.6
7	14.7	21.7	19.4	16.8	19.7	24.6	15.5	17.1	19.7	21.6	18.8	17.7	13.4	18.2	25	20	14.9	19.6	17.5	22.7	13.4	20.7	25.5	20.3
8	5.6	4.1	5.8	8.9	8.1	7.5	5.6	10	9	8.2	8.2	8.4	7.3	10.4	3.1	5.2	7.1	10.5	9.5	9.3	5.2	8.3	7	3.8

## Sheet: 4S1E
Wildtype	Looptail
118	171
148	160
137	194
127	156
120	148
123	156
141	141
142	158
123	176
113	153
111	163
136	142

## Sheet: 4S1F
Wildtype	Mutant
2.7	1.41
1.94	2.16
3.04	2.67
2.26	3.76
2.41	3.03
3.13	1.99
1.58	3.42
2.7	2.4
2.08	2.16
1.14	3.61
3.18	2.12
3.54	3.89

## Sheet: 4S1H
Wildtype	V2Tm
126.33	115.87
136.71	106.29
114.63	109.84
118.54	129.08
129.82	118.63
129.34	114.28
124.69	101.19
126.33	117.38
126.24	112.33
100.19	103.85
112.97	116.37
111.09	134.38
107.56	107.91
108.52	114.81
106.18	111.38

## Sheet: 4S1I
Wildtype	V2Tm
9.5	10.5
10.5	11
9.5	10
12	9.5
10	10
10	11.5
10.5	10.5
8.5	10.5
10.5	12
10.5	11
10	10.5
8.5	10.5
11	10
9.5	11.5
10.5	10.5
8	8.5
10	10
10.5	10.5
10	11
10.5	10
10.5	9.5
10.5	10
11.5	10.5
10	11
9.5	11
7.5	11
9.5	10
8.5	12
10	9.5
9.5	11.5
9	11
10.5	11
10	11.5
8	10
10	10
11.5	9.5
12	9.5
10.5	10.5
11	10
11.5	11
10	10
9	11
9.5	10.5
9	10.5
11.5	12
9.5	12
11	8.5
10	9
10.5	11
10.5	11.5
9	10
10	9
9.5	8.5
9	9
9	10.5
10	9.5
9	9.5
9.5	10
9.5	9.5
8.5	10
9.5	10
9.5	10
10.5	11
9	11
9	10.5
8.5	11
8	9
9	11
8.5	10
9.5	10.5
8.5	12
9.5	11
8.5	10.5
8.5	10.5
9.5	10
10	11
9.5	10.5
9.5	10
9	10.5
8	11.5
8	10
8	11.5
9	10
9	8
10.5	10
9	10.5
9	10
10	10
8.5	9.5
9	9.5
10	9.5
11.5	9
10	9.5
9.5	11
10	8.5
10	9.5
8.5	11
10.5	11
10	10.5
10.5	10
10.5	10
8	10
9.5	8.5
10	9
10.5	9.5
9.5	9
8.5	10
10.5	8.5
11	9.5
9	10
9.5	10.5
10.5	9.5
8	9
9.5	9
9	10.5
9.5	10.5
10.5	11
11	11
11	10.5
10.5	10.5
11.5	10
12.5	10
13.5	9
11.5	7.5
12	11
10	10
11	11
9	10.5
9	9.5
8	10
9	10
11	10
10.5	9
9	10
9	9.5
8.5	10.5
11	9.5
9	9
10	9
11	11
10	10
9.5	10
11.5	10
10.5	10.5
11	10.5
10	10.5
10.5	11
9	10
9	9.5
10	9
10	9.5
9.5	8.5
11.5	11
9.5	9
10.5	9.5
10.5	8.5
9.5	10
9	10.5
9	9
10	9.5
11	9.5
9	10
10	10
11	10
11	9.5
10.5	10.5
9.5	12
10	11
11.5	9
8.5	11
9.5	11
10	9
9	9.5
11	9
9.5	10.5
8	9
10.5	9.5
9	10.5
10	10.5
9.5	10.5
10	9
9	10.5
9.5	10.5
9.5	9.5
9.5	9.5
10.5	9.5
11	10
10	9.5
9.5	9.5
10	12.5
9.5	10.5
10	11
10.5	10.5
11.5	10.5
10	11
10.5	11
9.5	10.5
9.5	10
10.5	10.5
10.5	12
8	8.5
9	8.5
9.5	9.5
9.5	9
9.5	10
9	7.5
9.5	9.5
8.5	8
9.5	8
10.5	10
9.5	9
10.5	8.5
11	9.5
9	10
10.5	11.5
9.5	10
9.5	10.5
9.5	10.5
10	10.5
10.5	11
10.5	11
10.5	10.5
10	10.5
10	9.5
10.5	10
11	11
10	10.5
11	10.5
9.5	11
9.5	10.5
10	10
9.5	9.5
9	11
9.5	8.5
10.5	11.5
7.5	9.5
10.5	8.5
9	9.5
9	10
9.5	10
9.5	10.5
9	9
10	11.5
12	9.5
8.5	11
9	10.5
11	10
10.5	9.5
10.5	10.5
11	10.5
10	10.5
10.5	9.5
10	10
9.5	10
11	10.5
10.5	11
9.5	9.5
9.5	12
10	9.5
10	11
7	10.5
10	11
10.5	10.5
10	9.5
11	10.5
9.5	11.5
10	12
10	9.5
10	10.5
11	10.5
9.5	10
10	11.5
9.5	12.5
9.5	11
10.5	11
11	10.5
9.5	10.5
10	11
10	9.5
10	10
10	11.5
10.5	12
10.5	11.5
10.5	12
9.5	9
10.5	8.5
9	10
10	11
10	12.5
9.5	11
10.5	10
11.5	10.5
9.5	9
10.5	10.5
10	10
10.5	10
9.5	11.5
9.5	10
9.5	9
10	8

## Sheet: 4S1J
	Wildtype															V2Tm
4	14.66	5.61	9.84	10.08	9.91	9.57	9.32	6.9	7.08	10.27	10.94	9.92	11.28	9.42	9.3	13.11	7.63	7.46	13.39	4.5	7.09	7.04	10.08	8.4	9.15	10.66	16.04	6.92	11.02	4.84
5	23.38	28.04	23.77	27.73	30.63	27.83	22.03	25.86	33.63	31.51	32.81	29.77	33.08	27.54	35.66	23.77	28.24	34.44	27.68	27.93	28.35	29.58	26.89	33.59	30.28	24.59	29.25	28.46	28.81	31.45
6	34.48	42.06	37.7	42.02	36.04	38.26	35.59	50	35.4	29.45	35.94	39.69	30.83	39.86	33.33	31.15	40.46	31.34	38.39	47.75	42.52	42.25	37.82	35.88	35.21	41.8	25.47	39.23	33.05	37.9
7	25.86	22.43	22.13	15.13	18.92	22.61	27.97	14.66	18.58	19.86	18.75	14.5	20.3	18.84	13.95	24.59	19.08	19.4	15.18	16.22	18.11	18.31	22.69	16.03	20.42	16.39	22.64	20.77	22.88	19.35
8	1.72	1.87	6.56	5.04	4.5	1.74	5.08	2.59	5.31	8.9	1.56	6.11	4.51	4.35	7.75	7.38	4.58	7.46	5.36	3.6	3.94	2.82	2.52	6.11	4.93	6.56	6.6	4.62	4.24	6.45

## Sheet: 4S1K
Wildtype	V2Tm
138	146
125	167
146	158
142	131
130	131
135	149
138	166
138	142
133	154
172	166
164	143
153	125
156	154
161	139
152	146

## Sheet: 4S1L
Wildtype	V2Tm
1.65	1.56
2.51	2.39
2.15	1.45
2.82	4.36
1.54	3.48
0.85	2.69
1.24	1.89
1.24	1.81
2.57	0.74
2.65	1.37
0.7	1.4
2.23	1.6
1.28	1.48
1.77	1.23
2.44	1.56
