# Supplementary material for: Epithelial geometry regulates spindle orientation and progenitor fate during formation of the mammalian epidermis
Source: eLife journal article supplement (doi:10.7554/elife.47102), 2019-06-12
Supplement: supp [file Fig4Supp2_FromPrism.xlsx]

## Sheet: 4S2A
Angle	H/W Ratio			Statistics:
43.7287	1.40751				H/W Ratio
79.9588	1.15712			Best-fit values
87.2221	1.18906			Slope	0.006090 ± 0.0009291
49.1596	1.2318			Y-intercept when X=0.0	0.7964 ± 0.03263
40.3031	1.11702			X-intercept when Y=0.0	-130.8
49.5409	1.55827			1/slope	164.2
75.1265	1.38282			95% Confidence Intervals
74.9098	1.38018			Slope	0.004235 to 0.007945
42.4422	1.20057			Y-intercept when X=0.0	0.7312 to 0.8615
3.29468	0.893855			X-intercept when Y=0.0	-199.5 to -93.83
11.8741	0.973236			Goodness of Fit
53.7507	1.07459			R square	0.3803
71.7893	1.06516			Sy.x	0.1955
7.51114	0.78125			Is slope significantly non-zero?
51.2892	0.899621			F	42.96
3.45364	0.846561			DFn, DFd	1.000, 70.00
3.52595	0.948367			P value	< 0.0001
7.28141	0.829016			Deviation from zero?	Significant
67.2068	1.11235			Data
0	0.935551			Number of X values	72
0	0.834151			Maximum number of Y replicates	1
23.5212	1.25858			Total number of values	72
0	0.851064			Number of missing values	0
7.85185	0.892857
6.02959	1.19681
87.3003	1.47472
43.5611	1.06809
56.7777	1.66667
6.42236	1.07323
6.26749	0.614887
15.9232	0.888681
24.4433	1.18243
3.13935	0.576923
0	0.821509
7.42331	0.810295
3.31374	0.778689
11.1019	0.734619
16.097	1.0451
0	0.416667
46.8307	0.960659
48.4162	1.02439
31.1354	0.68306
7.73488	0.702663
43.83	0.724638
50.6745	0.963303
13.7575	0.810811
0	1.13147
8.59661	0.572363
6.83714	0.598802
30.1107	0.912779
3.20614	0.736568
52.7667	0.855513
6.57753	0.839695
14.6459	0.739645
0	0.481762
4.08435	0.978723
3.59231	0.673149
21.9435	0.940439
4.5739	0.742768
38.8101	1.07422
46.1238	0.914634
6.74039	0.789037
11.8741	0.957535
11.1019	0.755396
7.24448	0.696379
15.237	0.862069
7.30001	1.00524
8.29675	0.92827
3.57437	0.837989
25.1027	1.00418
55.505	0.862069
11.016	1.3076

## Sheet: 4S2B
Angle	H/W Ratio			Statistics:
0	0.738108				H/W Ratio
0	1.02273			Best-fit values
0	0.977047			Slope	0.005308 ± 0.0009498
2.16753	0.902579			Y-intercept when X=0.0	0.9428 ± 0.05009
2.49625	1.26156			X-intercept when Y=0.0	-177.6
2.59111	0.99734			1/slope	188.4
2.62917	0.865385			95% Confidence Intervals
2.9762	1.02896			Slope	0.003410 to 0.007206
3.03615	0.929368			Y-intercept when X=0.0	0.8426 to 1.043
4.88631	0.739988			X-intercept when Y=0.0	-301.5 to -118.6
4.92839	0.870902			Goodness of Fit
5.71052	1			R square	0.328
8.36564	0.903614			Sy.x	0.2292
10.4565	0.959302			Is slope significantly non-zero?
12.2951	0.986842			F	31.23
13.5375	0.635593			DFn, DFd	1.000, 64.00
14.1593	1.25			P value	< 0.0001
17.4037	1.21479			Deviation from zero?	Significant
20.6546	1.69837			Data
22.6199	1.32318			Number of X values	66
23.3553	1.08696			Maximum number of Y replicates	1
23.4291	0.808868			Total number of values	66
24.2651	1.46684			Number of missing values	0
25.5038	1.42405
26.179	1.22427
27.0949	0.893977
27.7333	0.773196
30.993	0.858008
34.022	0.630252
35.3124	0.925926
37.5719	1.13722
39.129	1.08902
40.2982	0.831389
45.9218	1.12551
47.0726	1.2
50.0869	1.33701
52.2661	1.39476
57.0269	1.6129
59.1928	1.0846
61.4733	1.07352
61.8881	1.23913
61.9275	1.28006
62.4169	1.07991
65.0794	1.4508
66.3126	1.26825
66.4728	1.41026
69.0047	1.41403
69.8299	1.25858
70.8363	1.61725
75.0572	1.46056
75.1265	1.4761
75.4074	1.25
75.8196	1.53918
78.2913	1.17507
78.3592	1.09409
78.9691	2.07226
79.2095	1.40735
79.6111	1.41047
80.2464	1.30208
80.9875	1.44231
81.0872	1.57618
82.3887	1.39104
83.0045	1.01215
84.4524	1.1811
85.9528	1.12232
90	1.2766
