# Supplementary material for: Epithelial geometry regulates spindle orientation and progenitor fate during formation of the mammalian epidermis
Source: eLife journal article supplement (doi:10.7554/elife.47102), 2019-06-12
Supplement: supp [file Fig5_FromPrism.xlsx]

## Sheet: 5B
Control	dcKO
128.053	121.857
115.098	125.51
111.332	137.185
101.23	109.242
109.323	118.197
112.753	116.067
124.048	112.35
105.751	123.901
133.248	133.5
118.744	113.932
112.512	88.6544
114.923	115.751
114.067	118.855
132.563	108.134
113.282	109.541
Statistics:
Parameter
Table Analyzed	dcKO FloodArea
Column A	Control
vs	vs
Column B	dcKO
Unpaired t test
P value	0.9209
P value summary	ns
Are means signif. different? (P < 0.05)	No
One- or two-tailed P value?	Two-tailed
t, df	t=0.1002 df=28
How big is the difference?
Mean ± SEM of column A	116.5 ± 2.402 N=15
Mean ± SEM of column B	116.8 ± 2.975 N=15
Difference between means	-0.3833 ± 3.824
95% confidence interval	-8.215 to 7.448
R square	0.0003587
F test to compare variances
F,DFn, Dfd	1.534, 14, 14
P value	0.433
P value summary	ns
Are variances significantly different?	No
	Control	dcKO
Number of values	15	15
Minimum	101.2	88.65
25% Percentile	111.3	109.5
Median	114.1	116.1
75% Percentile	124	123.9
Maximum	133.2	137.2
Mean	116.5	116.8
Std. Deviation	9.303	11.52
Std. Error	2.402	2.975
Lower 95% CI	111.3	110.5
Upper 95% CI	121.6	123.2

## Sheet: 5C
Control	CKO				Statistics:
7.8	9.6				Parameter
8.1	8.1				Table Analyzed	dcKOCellHeights
8.1	7.8				Column A	Control
6	8.1				vs	vs
6.9	8.1				Column B	CKO
6.9	8.4
7.8	9.3				Unpaired t test
7.5	8.1				P value	0.4209
8.1	8.1				P value summary	ns
6.9	9.6				Are means signif. different? (P < 0.05)	No
7.2	6.3				One- or two-tailed P value?	Two-tailed
7.2	8.4				t, df	t=0.8054 df=599
7.5	7.2
8.4	8.7				How big is the difference?
7.2	8.7				Mean ± SEM of column A	7.892 ± 0.04373 N=300
7.2	8.7				Mean ± SEM of column B	7.841 ± 0.04603 N=301
9	7.2				Difference between means	0.05114 ± 0.06349
5.4	9				95% confidence interval	-0.07331 to 0.1756
7.2	7.2				R square	0.001082
9	8.1
7.8	7.5				F test to compare variances
7.5	7.2				F,DFn, Dfd	1.112, 300, 299
7.5	9				P value	0.3608
9.6	7.2				P value summary	ns
7.8	8.4				Are variances significantly different?	No
8.7	7.8
7.8	9.3
8.4	8.7
7.5	9.6					Control	CKO
7.8	7.2				Number of values	300	301
6.9	7.8
7.5	5.7				Minimum	5.4	5.7
6.3	8.7				25% Percentile	7.5	7.2
8.4	7.8				Median	7.8	7.8
7.2	6.3				75% Percentile	8.4	8.4
6.9	6.6				Maximum	10.2	9.9
7.8	7.5
7.8	8.4				Mean	7.892	7.841
7.5	7.8				Std. Deviation	0.7574	0.7985
7.2	7.8				Std. Error	0.04373	0.04603
8.1	9
9.9	8.7				Lower 95% CI	7.806	7.75
8.1	9.3				Upper 95% CI	7.978	7.931
8.4	7.8
8.4	7.8
8.4	6.6
6.9	8.7
7.5	9.3
6.6	7.2
8.1	8.4
8.4	8.4
6.6	8.4
8.7	8.1
8.4	7.8
8.7	7.5
6.9	8.7
7.8	9
7.2	7.8
8.1	9.3
7.2	8.4
7.8	7.8
8.4	8.7
6.6	9
6.9	9.9
7.5	9.3
8.4	7.8
7.5	9
7.5	8.1
8.4	6.9
8.1	8.1
7.8	8.1
9.3	7.8
8.4	7.2
9	6.9
9	7.8
8.1	7.5
7.2	7.8
8.4	8.4
8.7	7.8
7.8	8.4
8.4	6.6
9.3	6.9
8.7	8.4
7.8	7.8
8.4	7.2
7.2	7.8
7.2	8.4
8.4	7.2
8.1	7.8
8.7	6.3
8.4	8.4
8.7	6.9
7.5	7.2
9.3	7.2
7.8	7.8
7.5	7.2
7.2	7.8
7.5	8.4
7.5	8.4
7.8	7.5
6.9	7.8
8.7	6.6
7.5	6.9
8.1	7.2
6.3	7.5
7.8	7.2
6.9	8.1
7.2	7.5
6.3	9.3
8.7	8.4
7.5	7.5
9	7.5
8.1	7.8
7.2	8.4
7.2	7.8
7.2	7.8
8.1	8.1
8.7	8.1
8.1	6.6
7.5	7.5
8.1	8.4
7.2	8.7
7.2	6.9
7.5	8.4
7.8	7.2
6.9	7.8
8.1	7.5
7.8	7.8
8.4	7.5
7.8	9.3
8.4	7.5
7.8	7.5
8.1	7.5
9.3	6.6
8.4	6.9
6.9	9.6
7.2	6.9
7.8	7.8
9.3	8.4
6.9	7.5
8.4	7.8
8.1	8.1
8.4	7.8
7.5	8.4
8.4	8.7
8.1	8.7
8.4	8.4
7.5	9.6
7.2	7.8
8.7	8.4
8.1	6.6
6.9	8.4
6.6	7.5
6.6	7.8
7.2	7.8
7.8	8.4
7.5	8.7
9	7.2
7.2	6.9
8.1	7.8
7.8	6.3
9.6	8.4
8.1	6.9
8.1	6.6
6.3	6.6
8.4	7.2
7.8	8.4
7.5	7.2
7.8	8.1
7.2	8.4
8.4	8.4
7.2	7.5
7.8	6.6
9.3	7.5
9	6.9
8.7	6.9
8.4	8.1
8.4	8.1
8.4	8.4
8.7	9.3
7.2	8.7
9.3	6.6
10.2	8.1
7.5	8.1
8.7	7.5
7.5	6.3
9.3	8.7
8.1	9.3
7.5	7.8
6.6	8.1
7.8	7.8
7.8	7.2
7.8	8.4
7.8	9
7.8	8.7
7.2	7.8
9	6.3
7.5	6.9
8.7	6.9
6.9	9.3
7.8	8.1
7.5	8.4
8.4	6.6
7.5	8.1
8.1	6.6
8.7	6.6
8.7	7.2
7.8	7.5
8.1	7.8
7.5	8.7
7.5	7.5
8.7	8.1
9	8.1
6.6	7.2
7.8	8.1
7.5	6.9
6.9	8.4
6.9	7.8
8.1	8.7
7.2	7.2
7.5	8.4
7.2	7.2
8.4	7.5
8.1	8.1
9	6.9
7.8	8.1
9	8.4
7.2	6.9
8.1	7.8
8.1	8.1
9.3	8.1
7.8	8.1
7.8	6.6
8.1	7.5
7.5	7.8
7.5	7.5
7.8	6.6
8.4	7.5
8.7	7.2
7.5	7.2
8.1	8.7
9.3	6.9
7.8	7.8
8.4	6.9
8.1	7.8
8.4	8.4
6.9	8.1
8.1	8.4
8.4	8.1
6.3	8.1
7.5	8.7
7.2	6.9
9.3	7.5
7.2	6.6
6.9	7.5
7.2	7.2
8.1	6.9
8.1	7.8
7.2	7.8
9	7.2
7.8	8.7
8.7	8.4
7.8	7.8
7.5	6.9
7.5	7.2
6.3	8.7
7.2	7.8
8.1	7.8
8.4	8.4
8.1	7.8
8.4	6.9
6.6	6
9	6.9
8.7	7.2
8.4	7.5
8.4	9.3
7.8	8.7
8.4	8.4
7.8	8.1
9	7.5
7.2	8.1
7.5	8.7
8.1	7.8
7.5	8.7
7.8	9
7.8	7.2
8.4	8.1
7.5	8.7
8.7	9
8.1	9.6
8.7	9
7.5	7.8
10.2	8.4
7.8	8.1
9.6	7.2
7.5	7.2
7.5	6.9
7.8	6
7.5	6.6
7.8	6.6
	6.9

## Sheet: 5D
Control	V12 dcKO
154	168
171	162
181	147
202	186
180	167
186	175
164	186
195	146
148	131
174	177
184	226
170	178
180	172
148	180
179	186
Statistics:
Parameter
Table Analyzed	dcKOCellDensity
Column A	Control
vs	vs
Column B	V12 dcKO
Unpaired t test
P value	0.784
P value summary	ns
Are means signif. different? (P < 0.05)	No
One- or two-tailed P value?	Two-tailed
t, df	t=0.2768 df=28
How big is the difference?
Mean ± SEM of column A	174.4 ± 4.076 N=15
Mean ± SEM of column B	172.5 ± 5.673 N=15
Difference between means	1.933 ± 6.985
95% confidence interval	-12.37 to 16.24
R square	0.002728
F test to compare variances
F,DFn, Dfd	1.937, 14, 14
P value	0.2286
P value summary	ns
Are variances significantly different?	No
	Control	V12 dcKO
Number of values	15	15
Minimum	148	131
25% Percentile	164	162
Median	179	175
75% Percentile	184	186
Maximum	202	226
Mean	174.4	172.5
Std. Deviation	15.79	21.97
Std. Error	4.076	5.673
Lower 95% CI	165.7	160.3
Upper 95% CI	183.1	184.6
