# Supplementary material for: Epithelial geometry regulates spindle orientation and progenitor fate during formation of the mammalian epidermis
Source: eLife journal article supplement (doi:10.7554/elife.47102), 2019-06-12
Supplement: supp [file Fig5DivisionAngles.xlsx]

## Sheet: Vangl2dcKOAngles
Item	Source	Length xyz	Length xy	Height	ND.T	ND.Z	ND.M	Comment		sin theta	angle_radians	angle_degrees
1	e14v12cko_control1_002.nd2	7.73	7.73	0.3	0	0	0			0.0388098	0.0388196	2.2242
2	e14v12cko_control1_003.nd2	6.97	6.94	0.6	0	0	0			0.0860832	0.0861899	4.93832
3	e14v12cko_control1_003.nd2	7.48	4.04	6.3	0	0	0			0.842246	1.00144	57.3781
4	e14v12cko_control1_003.nd2	9.8	9.72	1.2	0	0	0			0.122449	0.122757	7.03346
5	e14v12cko_control1_003.nd2	8.26	8.26	0.3	0	0	0			0.0363196	0.0363276	2.08142
6	e14v12cko_control1_004.nd2	11.85	11.83	0.6	0	0	0			0.0506329	0.0506546	2.90229
7	e14v12cko_control1_004.nd2	10.94	10.84	1.5	0	0	0			0.137112	0.137545	7.88074
8	e14v12cko_control1_004.nd2	10.84	10.84	0	0	0	0			0	0	0
9	e14v12cko_control1_004.nd2	8.44	6.73	5.1	0	0	0			0.604265	0.648844	37.176
10	e14v12cko_control1_004.nd2	6.23	1.67	6	0	0	0			0.963082	1.29823	74.3828
11	e14v12cko_control1_005.nd2	9.5	9.33	1.8	0	0	0			0.189474	0.190626	10.9221
12	e14v12cko_control1_005.nd2	7.12	5.52	4.5	0	0	0			0.632022	0.68416	39.1995
13	e14v12cko_control1_005.nd2	8.92	8.5	2.7	0	0	0			0.302691	0.307514	17.6193
14	e14v12cko_control1_005.nd2	8.85	8.85	0	0	0	0			0	0	0
15	e14v12cko_control1_005.nd2	12.11	12.08	0.9	0	0	0			0.0743187	0.0743873	4.26208
16	e14v12cko_control1_005.nd2	9.54	9.31	2.1	0	0	0			0.220126	0.221943	12.7164
17	e14v12cko_control1_006.nd2	8.73	6.61	5.7	0	0	0			0.652921	0.711434	40.7622
18	e14v12cko_control1_006.nd2	6.04	6.01	0.6	0	0	0			0.0993377	0.0995019	5.70104
19	e14v12cko_control1_006.nd2	5.11	0.33	5.1	0	0	0			0.998043	1.50822	86.4149
20	e14v12cko_control1_006.nd2	9.48	9.36	1.5	0	0	0			0.158228	0.158896	9.10405
21	e14v12cko_control1_007.nd2	7.13	6.35	3.25	0	0	0			0.45582	0.473294	27.1177
22	e14v12cko_control1_007.nd2	6.25	6.07	1.5	0	0	0			0.24	0.242366	13.8865
23	e14v12cko_control1_007.nd2	6.76	2.57	6.25	0	0	0			0.924556	1.17987	67.6015
24	e14v12cko_control1_008.nd2	7.73	7.71	0.6	0	0	0			0.0776197	0.0776978	4.45176
25	e14v12cko_control1_008.nd2	9.32	9.24	1.2	0	0	0			0.128755	0.129114	7.39768
26	e14v12cko_control1_009.nd2	8.54	7.88	3.3	0	0	0			0.386417	0.396744	22.7317
27	e14v12cko_control1_009.nd2	6.3	6.19	1.2	0	0	0			0.190476	0.191647	10.9806
28	e14v12cko_control1_009.nd2	10.58	10.05	3.3	0	0	0			0.311909	0.317202	18.1743
29	e14v12cko_control1_009.nd2	7.8	6.92	3.6	0	0	0			0.461538	0.479729	27.4864
30	e14v12cko_control1_009.nd2	7.86	5.98	5.1	0	0	0			0.648855	0.706079	40.4553
31	e14v12cko_control1_010.nd2	8.56	2.76	8.1	0	0	0			0.946262	1.24147	71.1312
32	e14v12cko_control1_011.nd2	5.64	5.6	0.6	0	0	0			0.106383	0.106585	6.10685
33	e14v12cko_control1_011.nd2	8.77	8	3.6	0	0	0			0.41049	0.422992	24.2356
34	e14v12cko_control1_012.nd2	9.86	9.78	1.2	0	0	0			0.121704	0.122006	6.99045
35	e14v12cko_control1_012.nd2	8.75	0.95	8.7	0	0	0			0.994286	1.46384	83.8719
36	e14v12cko_control1_012.nd2	9.83	9.67	1.8	0	0	0			0.183113	0.184152	10.5511
37	e14v12cko_control1_012.nd2	7.94	6.33	4.8	0	0	0			0.604534	0.649181	37.1953
38	e14v12cko_control1_013.nd2	9.83	8.58	4.8	0	0	0			0.488301	0.510142	29.229
39	e14v12cko_control1_014.nd2	8.74	3.29	8.1	0	0	0			0.926773	1.18573	67.9373
40	e14v12cko_control1_014.nd2	7.5	2.11	7.2	0	0	0			0.96	1.287	73.7398
41	e14v12cko_control1_014.nd2	9.43	6.43	6.9	0	0	0			0.731707	0.820823	47.0297
42	e14v12cko_control1_015.nd2	5.86	4.38	3.9	0	0	0			0.665529	0.728202	41.7229
43	e14v12cko_control1_015.nd2	6.95	0.83	6.9	0	0	0			0.992806	1.45077	83.1231
44	e14v12cko_control1_015.nd2	5.44	4.08	3.6	0	0	0			0.661765	0.72317	41.4346
45	e14v12cko_control1_016.nd2	5.57	5.53	0.6	0	0	0			0.10772	0.107929	6.1839
46	e14v12cko_control1_016.nd2	8.24	5.64	6	0	0	0			0.728155	0.815627	46.732
47	e14v12cko_control1_016.nd2	7.58	7.56	0.6	0	0	0			0.0791557	0.0792386	4.54004
48	e14v12cko_control1_016.nd2	8.52	7.04	4.8	0	0	0			0.56338	0.598471	34.2899
49	e14v12cko_control1_016.nd2	7.56	2.3	7.2	0	0	0			0.952381	1.26095	72.2472
50	e14v12cko_control1_016.nd2	8.92	1.98	8.7	0	0	0			0.975336	1.34824	77.2484
51	e14v12cko_control1_017.nd2	8.85	8.84	0.3	0	0	0			0.0338983	0.0339048	1.9426
52	e14v12cko_control1_017.nd2	11.05	10.91	1.8	0	0	0			0.162896	0.163625	9.37503
53	e14v12cko_control1_017.nd2	5.8	5.41	2.1	0	0	0			0.362069	0.370486	21.2273
54	e14v12cko_control1_017.nd2	10.44	10.4	0.9	0	0	0			0.0862069	0.086314	4.94543
55	e14v12cko_control1_018.nd2	10.58	10.54	0.9	0	0	0			0.0850662	0.0851691	4.87983
56	e14v12cko_control1_018.nd2	6.65	0.83	6.6	0	0	0			0.992481	1.44809	82.9695
57	e14v12cko_control1_018.nd2	7.73	4.48	6.3	0	0	0			0.815006	0.95274	54.588
58	e14v12cko_control1_019.nd2	10.47	10.37	1.5	0	0	0			0.143266	0.143761	8.23691
59	e14v12cko_control1_019.nd2	9.14	9.07	1.2	0	0	0			0.131291	0.131671	7.5442
60	e14v12cko_control1_019.nd2	8.19	4.85	6.6	0	0	0			0.805861	0.937128	53.6935
61	e14v12cko_control1_020.nd2	6.64	2.11	6.3	0	0	0			0.948795	1.2494	71.5853
62	e14v12cko_control1_020.nd2	9.22	8.97	2.1	0	0	0			0.227766	0.229782	13.1656
63	e14v12cko_control1_020.nd2	7.44	7.14	2.1	0	0	0			0.282258	0.286147	16.395
64	e14v12cko_control2_001.nd2	8.06	7.36	3.3	0	0	0			0.409429	0.421828	24.169
65	e14v12cko_control2_001.nd2	9.9	9.52	2.7	0	0	0			0.272727	0.276227	15.8266
66	e14v12cko_control2_001.nd2	10.23	10.23	0.3	0	0	0			0.0293255	0.0293297	1.68047
67	e14v12cko_control2_002.nd2	6.32	0.49	6.3	0	0	0			0.996835	1.49122	85.4406
68	e14v12cko_control2_002.nd2	8.83	8.78	0.9	0	0	0			0.101925	0.102103	5.85005
69	e14v12cko_control2_002.nd2	9.9	9.9	0	0	0	0			0	0	0
70	e14v12cko_control2_002.nd2	8.34	1.98	8.1	0	0	0			0.971223	1.33031	76.2213
71	e14v12cko_control2_004.nd2	7.01	6.18	3.3	0	0	0			0.470756	0.490148	28.0834
72	e14v12cko_control2_004.nd2	10.46	10.45	0.6	0	0	0			0.0573614	0.0573929	3.28837
73	e14v12cko_control2_004.nd2	10.6	10.59	0.6	0	0	0			0.0566038	0.056634	3.24489
74	e14v12cko_control2_005.nd2	9.11	8.08	4.2	0	0	0			0.461032	0.479158	27.4537
75	e14v12cko_control2_005.nd2	6.11	4.44	4.2	0	0	0			0.687398	0.7579	43.4245
76	e14v12cko_control2_006.nd2	9.09	8.85	2.1	0	0	0			0.231023	0.233129	13.3573
77	e14v12cko_control2_006.nd2	7.55	4.95	5.7	0	0	0			0.754967	0.855604	49.0225
78	e14v12cko_control2_006.nd2	6.87	1.9	6.6	0	0	0			0.960699	1.28951	73.8834
79	e14v12cko_control2_006.nd2	5.59	5.52	0.9	0	0	0			0.161002	0.161706	9.26505
80	e14v12cko_control2_006.nd2	9.73	9.56	1.8	0	0	0			0.184995	0.186067	10.6608
81	e14v12cko_control2_006.nd2	9.88	9.81	1.2	0	0	0			0.121457	0.121758	6.97623
82	e14v12cko_control2_007.nd2	7.19	5.61	4.5	0	0	0			0.625869	0.676246	38.746
83	e14v12cko_control2_007.nd2	8.81	8.62	1.8	0	0	0			0.204313	0.205762	11.7893
84	e14v12cko_control2_007.nd2	6.9	6.47	2.4	0	0	0			0.347826	0.355251	20.3544
85	e14v12cko_control2_007.nd2	9.11	9.11	0	0	0	0			0	0	0
86	e14v12cko_control2_007.nd2	7.44	6.34	3.9	0	0	0			0.524194	0.551768	31.614
87	e14v12cko_control2_008.nd2	5.88	3.39	4.8	0	0	0			0.816327	0.955022	54.7187
88	e14v12cko_control2_008.nd2	8.8	8.8	0	0	0	0			0	0	0
89	e14v12cko_control2_008.nd2	9.51	9.12	2.7	0	0	0			0.283912	0.287871	16.4938
90	e14v12cko_control2_008.nd2	5.46	5.45	0.3	0	0	0			0.0549451	0.0549727	3.14971
91	e14v12cko_control2_008.nd2	6.61	2.78	6	0	0	0			0.907716	1.13781	65.1915
92	e14v12cko_control2_008.nd2	7.05	4.14	5.7	0	0	0			0.808511	0.941617	53.9507
93	e14v12cko_control2_009.nd2	6.34	4.46	4.5	0	0	0			0.709779	0.789185	45.217
94	e14v12cko_control2_009.nd2	9.02	8.94	1.2	0	0	0			0.133038	0.133433	7.64516
95	e14v12cko_control2_009.nd2	10.92	10.92	0	0	0	0			0	0	0
96	e14v12cko_control2_010.nd2	9.72	9.34	2.7	0	0	0			0.277778	0.28148	16.1276
97	e14v12cko_control2_011.nd2	9.59	7.48	6	0	0	0			0.625652	0.675967	38.73
98	e14v12cko_control2_011.nd2	6.38	4.52	4.5	0	0	0			0.705329	0.782887	44.8561
99	e14v12cko_control2_011.nd2	7.1	4.24	5.7	0	0	0			0.802817	0.932005	53.3999
100	e14v12cko_control2_012.nd2	7.53	6.44	3.9	0	0	0			0.517928	0.544427	31.1934
101	e14v12cko_control2_012.nd2	6.78	5.55	3.9	0	0	0			0.575221	0.612875	35.1151
102	e14v12cko_control2_013.nd2	9.01	8.12	3.9	0	0	0			0.432852	0.447655	25.6487
103	e14v12cko_control2_013.nd2	6.79	6.09	3	0	0	0			0.441826	0.457633	26.2205
104	e14v12cko_control2_013.nd2	7.8	7.7	1.2	0	0	0			0.153846	0.15446	8.84988
105	e14v12cko_control2_013.nd2	8.87	7.96	3.9	0	0	0			0.439684	0.455247	26.0837
106	e14v12cko_control2_015.nd2	7.16	6.5	3	0	0	0			0.418994	0.432338	24.7711
107	e14v12cko_control2_016.nd2	7.5	0	7.5	0	0	0			1	1.5708	90
108	e14v12cko_control2_016.nd2	9.47	5.37	7.8	0	0	0			0.823654	0.967824	55.4522
109	e14v12cko_control2_017.nd2	8.1	7.4	3.3	0	0	0			0.407407	0.419613	24.0421
110	e14v12cko_control2_017.nd2	9.7	9.7	0	0	0	0			0	0	0
111	e14v12cko_control2_018.nd2	7.04	4.85	5.1	0	0	0			0.724432	0.81021	46.4216
112	e14v12cko_control2_018.nd2	6.75	1.4	6.6	0	0	0			0.977778	1.35959	77.8985
113	e14v12cko_control2_019.nd2	9.49	9.47	0.6	0	0	0			0.0632244	0.0632666	3.62491
114	e14v12cko_control2_019.nd2	8.39	8.13	2.1	0	0	0			0.250298	0.252988	14.4951
115	e14v12cko_control2_019.nd2	9.69	8.04	5.4	0	0	0			0.557276	0.591101	33.8676
116	e14v12cko_control2_020.nd2	6.66	6.32	2.1	0	0	0			0.315315	0.320789	18.3799
117	e14v12cko_control2_020.nd2	9.21	7.86	4.8	0	0	0			0.521173	0.548224	31.4109
118	e14v12cko_control2_020.nd2	9.89	9.82	1.2	0	0	0			0.121335	0.121634	6.96914
119	e14v12cko_control2_020.nd2	11.86	11.86	0	0	0	0			0	0	0
120	e14v12cko_control2_020.nd2	10.3	9.75	3.3	0	0	0			0.320388	0.326139	18.6864
121	e14v12cko_control2_020.nd2	8.6	6.69	5.4	0	0	0			0.627907	0.678861	38.8959
122	e14v12cko_control3_001.nd2	9.79	8.7	4.5	0	0	0			0.459653	0.477604	27.3647
123	e14v12cko_control3_001.nd2	8.78	8.45	2.4	0	0	0			0.273349	0.276872	15.8636
124	e14v12cko_control3_001.nd2	8.54	5.04	6.9	0	0	0			0.807963	0.940686	53.8973
125	e14v12cko_control3_001.nd2	6.69	1.09	6.6	0	0	0			0.986547	1.40658	80.5912
126	e14v12cko_control3_001.nd2	5.69	1.79	5.4	0	0	0			0.949033	1.25015	71.6286
127	e14v12cko_control3_001.nd2	6.91	6.67	1.8	0	0	0			0.260492	0.263532	15.0993
128	e14v12cko_control3_002.nd2	8.58	4.17	7.5	0	0	0			0.874126	1.06363	60.9417
129	e14v12cko_control3_002.nd2	8.41	7.97	2.7	0	0	0			0.321046	0.326834	18.7262
130	e14v12cko_control3_002.nd2	7.88	7.88	0	0	0	0			0	0	0
131	e14v12cko_control3_003.nd2	5.08	1.66	4.8	0	0	0			0.944882	1.23723	70.8883
132	e14v12cko_control3_003.nd2	10.98	10.96	0.6	0	0	0			0.0546448	0.054672	3.13248
133	e14v12cko_control3_003.nd2	8.28	7.72	3	0	0	0			0.362319	0.370755	21.2427
134	e14v12cko_control3_003.nd2	9.92	9.62	2.4	0	0	0			0.241935	0.24436	14.0008
135	e14v12cko_control3_003.nd2	7.7	3.41	6.9	0	0	0			0.896104	1.11091	63.6506
136	e14v12cko_control3_004.nd2	8.61	8.59	0.6	0	0	0			0.0696864	0.0697429	3.99598
137	e14v12cko_control3_004.nd2	5.55	4.46	3.3	0	0	0			0.594595	0.636761	36.4837
138	e14v12cko_control3_004.nd2	5.41	0.32	5.4	0	0	0			0.998152	1.50999	86.5158
139	e14v12cko_control3_004.nd2	6.48	2.46	6	0	0	0			0.925926	1.18348	67.8084
140	e14v12cko_control3_005.nd2	7.67	3.35	6.9	0	0	0			0.899609	1.11887	64.1067
141	e14v12cko_control3_005.nd2	6.09	4.68	3.9	0	0	0			0.640394	0.695011	39.8212
142	e14v12cko_control3_006.nd2	5.24	3.5	3.9	0	0	0			0.744275	0.839448	48.0968
143	e14v12cko_control3_006.nd2	7.8	7.71	1.2	0	0	0			0.153846	0.15446	8.84988
144	e14v12cko_control3_006.nd2	7.93	7.56	2.4	0	0	0			0.302648	0.30747	17.6167
145	e14v12cko_control3_006.nd2	6.62	5.55	3.6	0	0	0			0.543807	0.574966	32.9432
146	e14v12cko_control3_006.nd2	7.74	4.04	6.6	0	0	0			0.852713	1.02116	58.508
147	e14v12cko_control3_006.nd2	6.28	4.38	4.5	0	0	0			0.716561	0.798859	45.7712
148	e14v12cko_control3_006.nd2	7.58	7.56	0.6	0	0	0			0.0791557	0.0792386	4.54004
149	e14v12cko_control3_007.nd2	10.17	10.13	0.9	0	0	0			0.0884956	0.0886115	5.07706
150	e14v12cko_control3_007.nd2	10.16	10.05	1.5	0	0	0			0.147638	0.148179	8.49006
151	e14v12cko_control3_007.nd2	9.46	9.46	0.3	0	0	0			0.0317125	0.0317178	1.8173
152	e14v12cko_control3_007.nd2	9.44	9.2	2.1	0	0	0			0.222458	0.224335	12.8534
153	e14v12cko_control3_007.nd2	9.36	9.24	1.5	0	0	0			0.160256	0.16095	9.22178
154	e14v12cko_control3_007.nd2	9.25	7.72	5.1	0	0	0			0.551351	0.583983	33.4598
155	e14v12cko_control3_007.nd2	8.4	0	8.4	0	0	0			1	1.5708	90
156	e14v12cko_control3_007.nd2	8.38	6.4	5.4	0	0	0			0.644391	0.700227	40.1201
157	e14v12cko_control3_008.nd2	4.17	2.11	3.6	0	0	0			0.863309	1.04179	59.6902
158	e14v12cko_control3_008.nd2	9.41	9.39	0.6	0	0	0			0.063762	0.0638052	3.65577
159	e14v12cko_control3_008.nd2	10.04	9.68	2.7	0	0	0			0.268924	0.272276	15.6003
160	e14v12cko_control3_008.nd2	5.2	2.01	4.8	0	0	0			0.923077	1.17601	67.3801
161	e14v12cko_control3_008.nd2	9.08	3.45	8.4	0	0	0			0.92511	1.18133	67.685
162	e14v12cko_control3_008.nd2	8.53	8.45	1.2	0	0	0			0.14068	0.141148	8.08719
163	e14v12cko_control3_009.nd2	6.72	2.34	6.3	0	0	0			0.9375	1.21538	69.6359
164	e14v12cko_control3_009.nd2	9.36	8.51	3.9	0	0	0			0.416667	0.429775	24.6243
165	e14v12cko_control3_009.nd2	8.29	8.24	0.9	0	0	0			0.108565	0.108779	6.23257
166	e14v12cko_control3_009.nd2	10.27	9.23	4.5	0	0	0			0.438169	0.453561	25.9871
167	e14v12cko_control3_010.nd2	8.17	5.2	6.3	0	0	0			0.771114	0.880589	50.454
168	e14v12cko_control3_010.nd2	8.05	6.87	4.2	0	0	0			0.521739	0.548888	31.449
169	e14v12cko_control3_010.nd2	8.49	8.29	1.8	0	0	0			0.212014	0.213635	12.2404
170	e14v12cko_control3_011.nd2	10.13	6.8	7.5	0	0	0			0.740375	0.833628	47.7634
171	e14v12cko_control3_011.nd2	9.42	8.43	4.2	0	0	0			0.44586	0.462135	26.4784
172	e14v12cko_control3_011.nd2	7.72	5.2	5.7	0	0	0			0.738342	0.830609	47.5904
173	e14v12cko_control3_011.nd2	6.91	3.91	5.7	0	0	0			0.824891	0.97001	55.5775
174	e14v12cko_control3_012.nd2	8.96	8.94	0.6	0	0	0			0.0669643	0.0670144	3.83964
175	e14v12cko_control3_012.nd2	11.22	11.22	0	0	0	0			0	0	0
176	e14v12cko_control3_012.nd2	6.89	6.83	0.9	0	0	0			0.130624	0.130998	7.50566
177	e14v12cko_control3_012.nd2	6.4	2.91	5.7	0	0	0			0.890625	1.09872	62.9519
178	e14v12cko_control3_012.nd2	7.35	2.54	6.9	0	0	0			0.938776	1.21906	69.8469
179	e14v12cko_control3_012.nd2	8.04	7.33	3.3	0	0	0			0.410448	0.422945	24.233
180	e14v12cko_control3_013.nd2	10.29	10.14	1.8	0	0	0			0.174927	0.175832	10.0744
181	e14v12cko_control3_013.nd2	9.59	9.48	1.5	0	0	0			0.156413	0.157058	8.99875
182	e14v12cko_control3_013.nd2	6.65	4.6	4.8	0	0	0			0.721805	0.806406	46.2037
183	e14v12cko_control3_013.nd2	9.85	9.69	1.8	0	0	0			0.182741	0.183774	10.5295
184	e14v12cko_control3_013.nd2	11	10.93	1.2	0	0	0			0.109091	0.109308	6.26291
185	e14v12cko_control3_013.nd2	6.92	5.92	3.6	0	0	0			0.520231	0.547122	31.3478
186	e14v12cko_control3_013.nd2	8.12	7.12	3.9	0	0	0			0.480296	0.500992	28.7047
187	e14v12cko_control3_014.nd2	7.75	6.7	3.9	0	0	0			0.503226	0.527328	30.2136
188	e14v12cko_control3_014.nd2	8.19	6.84	4.5	0	0	0			0.549451	0.581706	33.3293
189	e14v12cko_control3_015.nd2	8.48	8.43	0.9	0	0	0			0.106132	0.106332	6.09239
190	e14v12cko_control3_015.nd2	7.68	3.93	6.6	0	0	0			0.859375	1.03405	59.2465
191	e14v12cko_control3_015.nd2	6.02	0.46	6	0	0	0			0.996678	1.48926	85.3283
192	e14v12cko_control3_016.nd2	7.7	7.55	1.5	0	0	0			0.194805	0.196059	11.2333
193	e14v12cko_control3_016.nd2	7.42	6.79	3	0	0	0			0.404313	0.416227	23.8481
194	e14v12cko_control3_016.nd2	9.64	9.6	0.9	0	0	0			0.093361	0.0934972	5.35699
195	e14v12cko_control3_016.nd2	7.7	4.83	6	0	0	0			0.779221	0.893422	51.1893
196	e14v12cko_control3_016.nd2	7.17	2.8	6.6	0	0	0			0.920502	1.16936	66.9996
197	e14v12cko_control3_017.nd2	7.96	6.35	4.8	0	0	0			0.603015	0.647275	37.0861
198	e14v12cko_control3_017.nd2	7.95	7.81	1.5	0	0	0			0.188679	0.189817	10.8757
199	e14v12cko_control3_017.nd2	7.72	7.67	0.9	0	0	0			0.11658	0.116846	6.69478
200	e14v12cko_control3_017.nd2	7.92	6.9	3.9	0	0	0			0.492424	0.514873	29.5
201	e14v12cko_control3_017.nd2	7.98	7.7	2.1	0	0	0			0.263158	0.266294	15.2575
202	e14v12cko_control3_017.nd2	9.87	9.58	2.4	0	0	0			0.243161	0.245623	14.0732
203	e14v12cko_control3_018.nd2	9.7	9.47	2.1	0	0	0			0.216495	0.218223	12.5032
204	e14v12cko_control3_018.nd2	9.77	9.69	1.2	0	0	0			0.122825	0.123136	7.05517
205	e14v12cko_control3_018.nd2	11.28	11.28	0.3	0	0	0			0.0265957	0.0265989	1.524
206	e14v12cko_control3_019.nd2	5.33	1.53	5.1	0	0	0			0.956848	1.27595	73.1068
207	e14v12cko_control3_019.nd2	8.05	6.67	4.5	0	0	0			0.559006	0.593187	33.9871
208	e14v12cko_control3_019.nd2	6.27	1.82	6	0	0	0			0.956938	1.27626	73.1245
209	e14v12cko_control3_019.nd2	8.62	7.36	4.5	0	0	0			0.522042	0.549243	31.4693
210	e14v12cko_control3_020.nd2	10.26	10.24	0.6	0	0	0			0.0584795	0.0585129	3.35254
211	e14v12cko_control3_020.nd2	5	3.75	3.3	0	0	0			0.66	0.720819	41.2999
Item	Source	Length xyz	Length xy	Height	ND.T	ND.Z	ND.M	Comment		sin theta	angle_radians	angle_degrees
1	e14v12cko1_001.nd2	6.74	5.02	4.5	0	0	0			0.667656	0.731055	41.8864
2	e14v12cko1_001.nd2	6.68	6.67	0.3	0	0	0			0.0449102	0.0449253	2.57403
3	e14v12cko1_001.nd2	7.64	2.54	7.2	0	0	0			0.942408	1.22976	70.46
4	e14v12cko1_001.nd2	8.14	7.3	3.6	0	0	0			0.44226	0.458117	26.2482
5	e14v12cko1_002.nd2	8.9	8.65	2.1	0	0	0			0.235955	0.238201	13.6479
6	e14v12cko1_002.nd2	8.82	8.8	0.6	0	0	0			0.0680272	0.0680798	3.90068
7	e14v12cko1_002.nd2	7.43	7.33	1.2	0	0	0			0.161507	0.162218	9.2944
8	e14v12cko1_002.nd2	7.38	1.63	7.2	0	0	0			0.97561	1.34948	77.3196
9	e14v12cko1_002.nd2	9.67	9.09	3.3	0	0	0			0.341262	0.348259	19.9538
10	e14v12cko1_002.nd2	8.63	2.98	8.1	0	0	0			0.938586	1.21851	69.8155
11	e14v12cko1_003.nd2	11.01	10.91	1.5	0	0	0			0.13624	0.136665	7.83032
12	e14v12cko1_003.nd2	6.81	6.64	1.5	0	0	0			0.220264	0.222085	12.7246
13	e14v12cko1_003.nd2	10	9.84	1.8	0	0	0			0.18	0.180986	10.3698
14	e14v12cko1_003.nd2	9.1	8.69	2.7	0	0	0			0.296703	0.301239	17.2597
15	e14v12cko1_005.nd2	10.36	10.32	0.9	0	0	0			0.0868726	0.0869822	4.98371
16	e14v12cko1_005.nd2	8.65	8.52	1.5	0	0	0			0.17341	0.174291	9.98617
17	e14v12cko1_005.nd2	8.45	7.33	4.2	0	0	0			0.497041	0.520186	29.8045
18	e14v12cko1_005.nd2	6.81	6.79	0.6	0	0	0			0.0881057	0.0882201	5.05464
19	e14v12cko1_005.nd2	8.57	5.09	6.9	0	0	0			0.805134	0.935902	53.6232
20	e14v12cko1_005.nd2	9.99	9.95	0.9	0	0	0			0.0900901	0.0902124	5.16879
21	e14v12cko1_005.nd2	7.87	5.42	5.7	0	0	0			0.724269	0.809974	46.4081
22	e14v12cko1_006.nd2	7.96	7.49	2.7	0	0	0			0.339196	0.346062	19.8279
23	e14v12cko1_006.nd2	6.71	2.3	6.3	0	0	0			0.938897	1.21941	69.8672
24	e14v12cko1_006.nd2	5.47	2.62	4.8	0	0	0			0.877514	1.07065	61.3439
25	e14v12cko1_006.nd2	7.42	6.12	4.2	0	0	0			0.566038	0.601692	34.4744
26	e14v12cko1_006.nd2	10.4	10.4	0	0	0	0			0	0	0
27	e14v12cko1_006.nd2	8.81	8.04	3.6	0	0	0			0.408627	0.420949	24.1186
28	e14v12cko1_007.nd2	6.22	6.19	0.6	0	0	0			0.096463	0.0966133	5.53553
29	e14v12cko1_007.nd2	9.8	9.8	0	0	0	0			0	0	0
30	e14v12cko1_007.nd2	9.47	9.43	0.9	0	0	0			0.095037	0.0951806	5.45345
31	e14v12cko1_007.nd2	6.03	4.83	3.6	0	0	0			0.597015	0.639775	36.6564
32	e14v12cko1_007.nd2	6.19	3.91	4.8	0	0	0			0.775444	0.887418	50.8453
33	e14v12cko1_007.nd2	7.17	3.93	6	0	0	0			0.83682	0.991449	56.8058
34	e14v12cko1_007.nd2	6.48	3.58	5.4	0	0	0			0.833333	0.985111	56.4427
35	e14v12cko1_008.nd2	7.64	4.73	6	0	0	0			0.78534	0.903246	51.7522
36	e14v12cko1_008.nd2	9.9	9.79	1.5	0	0	0			0.151515	0.152101	8.71474
37	e14v12cko1_008.nd2	11.48	11.38	1.5	0	0	0			0.130662	0.131037	7.50785
38	e14v12cko1_008.nd2	9.59	8.76	3.9	0	0	0			0.406674	0.41881	23.996
39	e14v12cko1_008.nd2	7.88	6.47	4.5	0	0	0			0.571066	0.607804	34.8246
40	e14v12cko1_008.nd2	9.99	9.82	1.8	0	0	0			0.18018	0.18117	10.3803
41	e14v12cko1_011.nd2	8.67	8.65	0.6	0	0	0			0.0692042	0.0692595	3.96828
42	e14v12cko1_011.nd2	8.25	8.11	1.5	0	0	0			0.181818	0.182835	10.4757
43	e14v12cko1_011.nd2	9.03	6.17	6.6	0	0	0			0.730897	0.819635	46.9616
44	e14v12cko1_011.nd2	6.45	2.37	6	0	0	0			0.930233	1.19505	68.4711
45	e14v12cko1_012.nd2	6.85	5.16	4.5	0	0	0			0.656934	0.716745	41.0665
46	e14v12cko1_012.nd2	8.82	3.5	8.1	0	0	0			0.918367	1.16393	66.6886
47	e14v12cko1_012.nd2	8.2	8.2	0.3	0	0	0			0.0365854	0.0365935	2.09665
48	e14v12cko1_012.nd2	9.64	9.62	0.6	0	0	0			0.0622407	0.0622809	3.56843
49	e14v12cko1_012.nd2	10.11	9.95	1.8	0	0	0			0.178042	0.178996	10.2557
50	e14v12cko1_013.nd2	8.8	4.07	7.8	0	0	0			0.886364	1.08943	62.4198
51	e14v12cko1_013.nd2	8.33	8.28	0.9	0	0	0			0.108043	0.108255	6.20253
52	e14v12cko1_014.nd2	7.92	5.16	6	0	0	0			0.757576	0.859591	49.2509
53	e14v12cko1_014.nd2	6.6	6.25	2.1	0	0	0			0.318182	0.323811	18.553
54	e14v12cko1_014.nd2	7.8	6.57	4.2	0	0	0			0.538462	0.56861	32.579
55	e14v12cko1_016.nd2	10.13	10.11	0.6	0	0	0			0.05923	0.0592647	3.39562
56	e14v12cko1_016.nd2	9.1	9.1	0.3	0	0	0			0.032967	0.032973	1.88921
57	e14v12cko1_016.nd2	7.39	6.62	3.3	0	0	0			0.446549	0.462905	26.5225
58	e14v12cko1_017.nd2	7.3	4.55	5.7	0	0	0			0.780822	0.89598	51.3359
59	e14v12cko1_017.nd2	5.65	1.66	5.4	0	0	0			0.955752	1.27221	72.8921
60	e14v12cko1_018.nd2	5.66	5.46	1.5	0	0	0			0.265018	0.268222	15.368
61	e14v12cko1_019.nd2	6.48	2.46	6	0	0	0			0.925926	1.18348	67.8084
62	e14v12cko1_019.nd2	8.19	2.49	7.8	0	0	0			0.952381	1.26095	72.2472
63	e14v12cko1_019.nd2	6.04	0.67	6	0	0	0			0.993377	1.45565	83.4024
64	e14v12cko1_019.nd2	8.66	2.11	8.4	0	0	0			0.969977	1.32514	75.9247
65	e14v12cko1_019.nd2	9.1	8.59	3	0	0	0			0.32967	0.335954	19.2488
66	e14v12cko1_020.nd2	5.91	3.45	4.8	0	0	0			0.812183	0.947884	54.3097
67	e14v12cko1_020.nd2	7.2	2.06	6.9	0	0	0			0.958333	1.28111	73.4022
68	e14v12cko1_020.nd2	9.11	9.03	1.2	0	0	0			0.131723	0.132107	7.56919
69	e14v12cko1_020.nd2	6.07	4.08	4.5	0	0	0			0.741351	0.835081	47.8466
70	e14v12cko1_020.nd2	6.53	6.19	2.1	0	0	0			0.321593	0.327411	18.7593
71	e14v12cko2_001.nd2	22.63	22.54	2	0	0	0			0.0883783	0.0884937	5.07032
72	e14v12cko2_001.nd2	18.95	18.53	4	0	0	0			0.211082	0.212682	12.1858
73	e14v12cko2_001.nd2	14.8	14.8	0	0	0	0			0	0	0
74	e14v12cko2_001.nd2	22.16	22.14	1	0	0	0			0.0451264	0.0451417	2.58643
75	e14v12cko2_001.nd2	18.91	18.81	2	0	0	0			0.105764	0.105962	6.07119
76	e14v12cko2_006.nd2	21.86	21.86	0.3	0	0	0			0.0137237	0.0137241	0.786335
77	e14v12cko2_006.nd2	20.45	20.42	1.2	0	0	0			0.0586797	0.0587134	3.36403
78	e14v12cko2_006.nd2	16.44	16.3	2.1	0	0	0			0.127737	0.128087	7.33885
79	e14v12cko2_006.nd2	17.42	16.98	3.9	0	0	0			0.223881	0.225794	12.9371
80	e14v12cko2_007.nd2	8.7	7.61	4.2	0	0	0			0.482759	0.503802	28.8657
81	e14v12cko2_007.nd2	15.19	15.17	0.6	0	0	0			0.0394997	0.0395099	2.26375
82	e14v12cko2_007.nd2	19.57	19.57	0.3	0	0	0			0.0153296	0.0153302	0.878355
83	e14v12cko2_008.nd2	20.14	19.96	2.7	0	0	0			0.134062	0.134466	7.70436
84	e14v12cko2_008.nd2	14.39	13.46	5.1	0	0	0			0.354413	0.362286	20.7575
85	e14v12cko2_009.nd2	14.63	14.63	0.3	0	0	0			0.0205058	0.0205072	1.17498
86	e14v12cko2_009.nd2	2.67	1.17	2.4	0	0	0			0.898876	1.1172	64.0108
87	e14v12cko2_009.nd2	6.4	5.08	3.9	0	0	0			0.609375	0.655272	37.5443
88	e14v12cko2_009.nd2	15.86	14.55	6.3	0	0	0			0.397226	0.408492	23.4049
89	e14v12cko2_009.nd2	11.05	7.83	7.8	0	0	0			0.705882	0.783668	44.9009
90	e14v12cko2_010.nd2	1.2	0	1.2	0	0	0			1	1.5708	90
91	e14v12cko2_010.nd2	9.71	7.86	5.7	0	0	0			0.587024	0.627378	35.9461
92	e14v12cko2_010.nd2	8.95	7.91	4.2	0	0	0			0.469274	0.488468	27.9872
93	e14v12cko2_010.nd2	9.26	6.18	6.9	0	0	0			0.74514	0.840745	48.1712
94	e14v12cko2_011.nd2	10.28	7.33	7.2	0	0	0			0.700389	0.775942	44.4582
95	e14v12cko2_011.nd2	20.25	20.24	0.3	0	0	0			0.0148148	0.0148154	0.848857
96	e14v12cko2_011.nd2	10.96	10.92	0.9	0	0	0			0.0821168	0.0822094	4.71025
97	e14v12cko2_012.nd2	14.51	14.26	2.7	0	0	0			0.186079	0.187169	10.724
98	e14v12cko2_012.nd2	16.34	16.33	0.6	0	0	0			0.0367197	0.036728	2.10436
99	e14v12cko2_012.nd2	8.38	6.4	5.4	0	0	0			0.644391	0.700227	40.1201
100	e14v12cko2_014.nd2	13.5	13.16	3	0	0	0			0.222222	0.224093	12.8396
101	e14v12cko2_015.nd2	6.47	4.92	4.2	0	0	0			0.64915	0.706466	40.4775
102	e14v12cko2_015.nd2	15.6	14.74	5.1	0	0	0			0.326923	0.333046	19.0821
103	e14v12cko2_015.nd2	20.25	20.25	0	0	0	0			0	0	0
104	e14v12cko2_016.nd2	14.06	13.67	3.3	0	0	0			0.234708	0.236919	13.5744
105	e14v12cko2_016.nd2	12.15	11.78	3	0	0	0			0.246914	0.249494	14.2949
106	e14v12cko2_016.nd2	11.16	9.6	5.7	0	0	0			0.510753	0.53606	30.714
107	e14v12cko2_016.nd2	9.65	5.25	8.1	0	0	0			0.839378	0.996138	57.0745
108	e14v12cko2_016.nd2	10.18	8.22	6	0	0	0			0.589391	0.630305	36.1138
109	e14v12cko2_017.nd2	19.04	19.02	0.9	0	0	0			0.0472689	0.0472865	2.70932
110	e14v12cko2_017.nd2	10.34	7.7	6.9	0	0	0			0.667311	0.730593	41.8599
111	e14v12cko2_017.nd2	11.46	9.94	5.7	0	0	0			0.497382	0.520579	29.827
112	e14v12cko2_018.nd2	13.84	13.28	3.9	0	0	0			0.281792	0.285661	16.3672
113	e14v12cko2_018.nd2	11.36	9.45	6.3	0	0	0			0.554577	0.587855	33.6816
114	e14v12cko2_018.nd2	6.82	2.62	6.3	0	0	0			0.923754	1.17777	67.4812
115	e14v12cko2_018.nd2	16	15.44	4.2	0	0	0			0.2625	0.265612	15.2185
116	e14v12cko2_018.nd2	12.53	11.45	5.1	0	0	0			0.407023	0.419193	24.018
117	e14v12cko2_019.nd2	21.59	21.58	0.6	0	0	0			0.0277906	0.0277942	1.59249
118	e14v12cko2_019.nd2	15.49	15.41	1.5	0	0	0			0.0968367	0.0969887	5.55704
119	e14v12cko2_019.nd2	18.61	18.61	0	0	0	0			0	0	0
120	e14v12cko2_019.nd2	8.4	6.89	4.8	0	0	0			0.571429	0.608246	34.8499
121	e14v12cko2_019.nd2	8.31	6.05	5.7	0	0	0			0.685921	0.755868	43.308
122	e14v12cko2_019.nd2	8.26	4.96	6.6	0	0	0			0.799031	0.925683	53.0377
123	e14v12cko3_001.nd2	7.31	7.31	0	0	0	0			0	0	0
124	e14v12cko3_001.nd2	7.15	4.32	5.7	0	0	0			0.797203	0.922648	52.8638
125	e14v12cko3_001.nd2	7.12	5.26	4.8	0	0	0			0.674157	0.739823	42.3887
126	e14v12cko3_002.nd2	7.69	6.44	4.2	0	0	0			0.546164	0.577778	33.1042
127	e14v12cko3_003.nd2	10.23	10.16	1.2	0	0	0			0.117302	0.117573	6.73642
128	e14v12cko3_003.nd2	7.33	2.48	6.9	0	0	0			0.941337	1.22657	70.2773
129	e14v12cko3_003.nd2	5.1	0	5.1	0	0	0			1	1.5708	90
130	e14v12cko3_004.nd2	8.33	6.35	5.4	0	0	0			0.648259	0.705296	40.4105
131	e14v12cko3_004.nd2	7.06	5.17	4.8	0	0	0			0.679887	0.747608	42.8348
132	e14v12cko3_004.nd2	3.3	0	3.3	0	0	0			1	1.5708	90
133	e14v12cko3_005.nd2	6.33	6.15	1.5	0	0	0			0.236967	0.239243	13.7076
134	e14v12cko3_006.nd2	10.61	10.41	2.1	0	0	0			0.197926	0.199242	11.4157
135	e14v12cko3_006.nd2	7.55	6.27	4.2	0	0	0			0.556291	0.589916	33.7997
136	e14v12cko3_006.nd2	8.52	7.24	4.5	0	0	0			0.528169	0.556443	31.8818
137	e14v12cko3_007.nd2	7.35	5.29	5.1	0	0	0			0.693878	0.76686	43.9378
138	e14v12cko3_007.nd2	7.79	2.98	7.2	0	0	0			0.924262	1.1791	67.5573
139	e14v12cko3_007.nd2	9.43	7.93	5.1	0	0	0			0.540827	0.57142	32.74
140	e14v12cko3_008.nd2	6.94	6.25	3	0	0	0			0.432277	0.447016	25.6121
141	e14v12cko3_008.nd2	9.16	9.14	0.6	0	0	0			0.0655022	0.0655491	3.75569
142	e14v12cko3_009.nd2	8.4	4.32	7.2	0	0	0			0.857143	1.0297	58.9973
143	e14v12cko3_009.nd2	7.61	7.55	0.9	0	0	0			0.118265	0.118543	6.79201
144	e14v12cko3_009.nd2	8.56	8.02	3	0	0	0			0.350467	0.35807	20.5159
145	e14v12cko3_012.nd2	6.04	0.69	6	0	0	0			0.993377	1.45565	83.4024
146	e14v12cko3_013.nd2	9.17	8.3	3.9	0	0	0			0.4253	0.439293	25.1696
147	e14v12cko3_013.nd2	5.81	2.78	5.1	0	0	0			0.877797	1.07124	61.3777
148	e14v12cko3_013.nd2	8.21	3.35	7.5	0	0	0			0.91352	1.15185	65.9964
149	e14v12cko3_013.nd2	6.76	3.1	6	0	0	0			0.887574	1.09205	62.57
150	e14v12cko3_013.nd2	6.17	4.22	4.5	0	0	0			0.729335	0.81735	46.8307
151	e14v12cko3_014.nd2	6.61	2.01	6.3	0	0	0			0.953101	1.26332	72.3831
152	e14v12cko3_015.nd2	9.18	5.29	7.5	0	0	0			0.816993	0.956178	54.785
153	e14v12cko3_015.nd2	4.48	2.21	3.9	0	0	0			0.870536	1.05629	60.521
154	e14v12cko3_015.nd2	6.32	3.29	5.4	0	0	0			0.85443	1.02445	58.6969
155	e14v12cko3_016.nd2	4.85	0.67	4.8	0	0	0			0.989691	1.42708	81.7657
156	e14v12cko3_016.nd2	9.51	9.47	0.9	0	0	0			0.0946372	0.0947791	5.43044
157	e14v12cko3_016.nd2	7.07	2.53	6.6	0	0	0			0.933522	1.20411	68.9906
158	e14v12cko3_016.nd2	8.95	8.95	0	0	0	0			0	0	0
159	e14v12cko3_016.nd2	7.28	7.28	0	0	0	0			0	0	0
160	e14v12cko3_017.nd2	8.78	8.45	2.4	0	0	0			0.273349	0.276872	15.8636
161	e14v12cko3_017.nd2	9.09	8.91	1.8	0	0	0			0.19802	0.199337	11.4212
162	e14v12cko3_017.nd2	9.67	9.63	0.9	0	0	0			0.0930714	0.0932062	5.34032
163	e14v12cko3_017.nd2	8.72	6.6	5.7	0	0	0			0.65367	0.712423	40.8189
164	e14v12cko3_017.nd2	10.3	7.64	6.9	0	0	0			0.669903	0.734078	42.0596
165	e14v12cko3_018.nd2	8.38	8.03	2.4	0	0	0			0.286396	0.290463	16.6423
166	e14v12cko3_018.nd2	9.89	9.67	2.1	0	0	0			0.212336	0.213965	12.2593
167	e14v12cko3_018.nd2	6.83	5.61	3.9	0	0	0			0.57101	0.607736	34.8207
168	e14v12cko3_018.nd2	9.92	9.24	3.6	0	0	0			0.362903	0.371382	21.2786
169	e14v12cko3_018.nd2	8.13	3.14	7.5	0	0	0			0.922509	1.17453	67.2957
170	e14v12cko3_018.nd2	6.71	3	6	0	0	0			0.894188	1.10661	63.4043
171	e14v12cko3_019.nd2	6.97	6.43	2.7	0	0	0			0.387374	0.397782	22.7912
172	e14v12cko3_019.nd2	7.43	2.76	6.9	0	0	0			0.928668	1.1908	68.2281
173	e14v12cko3_019.nd2	10.15	9.6	3.3	0	0	0			0.325123	0.331142	18.973
174	e14v12cko3_019.nd2	9.03	8.14	3.9	0	0	0			0.431894	0.446591	25.5878
175	e14v12cko3_020.nd2	5.11	1.76	4.8	0	0	0			0.939335	1.22069	69.9401
176	e14v12cko3_020.nd2	9.54	6.89	6.6	0	0	0			0.691824	0.764012	43.7747
177	e14v12cko3_020.nd2	8.22	4.46	6.9	0	0	0			0.839416	0.996208	57.0785
178	e14v12cko3_020.nd2	7.02	6.92	1.2	0	0	0			0.17094	0.171784	9.84249
179	e14v12cko3_020.nd2	9.68	9.37	2.4	0	0	0			0.247934	0.250547	14.3553
180	e14v12cko3_020.nd2	9.76	9.38	2.7	0	0	0			0.276639	0.280295	16.0597
181	e14v12cko3_020.nd2	7.5	6.4	3.9	0	0	0			0.52	0.546851	31.3323
