# Supplementary material for: Epithelial geometry regulates spindle orientation and progenitor fate during formation of the mammalian epidermis
Source: eLife journal article supplement (doi:10.7554/elife.47102), 2019-06-12
Supplement: supp [file Fig5Supp1_FromPrism.xlsx]

## Sheet: 5S1B
Wildtype	Fz6 mutant
136.87	144.813
138.12	132.951
136.322	137.196
142.849	135.847
138.606	140.026
142.853	138.282
131.589	124.521
136.455	118.797
124.722	136.489
126.055	124.914
138.688	124.626
135.509	123.589
127.293	118.233
116.64	129.509
141.439	113.444
Statistics:
Parameter
Table Analyzed	Fz6FloodArea
Column A	Wildtype
vs	vs
Column B	Fz6 mutant
Unpaired t test
P value	0.1357
P value summary	ns
Are means signif. different? (P < 0.05)	No
One- or two-tailed P value?	Two-tailed
t, df	t=1.536 df=28
How big is the difference?
Mean ± SEM of column A	134.3 ± 1.945 N=15
Mean ± SEM of column B	129.5 ± 2.377 N=15
Difference between means	4.718 ± 3.071
95% confidence interval	-1.572 to 11.01
R square	0.07774
F test to compare variances
F,DFn, Dfd	1.494, 14, 14
P value	0.4624
P value summary	ns
Are variances significantly different?	No
	Wildtype	Fz6 mutant
Number of values	15	15
Minimum	116.6	113.4
25% Percentile	127.3	123.6
Median	136.5	129.5
75% Percentile	138.7	137.2
Maximum	142.9	144.8
Mean	134.3	129.5
Std. Deviation	7.533	9.206
Std. Error	1.945	2.377
Lower 95% CI	130.1	124.5
Upper 95% CI	138.4	134.6

## Sheet: 5S1C
Wildtype	Fz6 Mutant			Statistics:
7.5	8			Parameter
8.5	8			Table Analyzed	Fz6CellHeights
8.5	7.5			Column A	Wildtype
7	7			vs	vs
7	8.5			Column B	Fz6 Mutant
7	7.5
8	8.5			Unpaired t test
8.5	7.5			P value	0.4283
9	7.5			P value summary	ns
7.5	7			Are means signif. different? (P < 0.05)	No
8	8			One- or two-tailed P value?	Two-tailed
8	6.5			t, df	t=0.7924 df=898
7.5	7
8	8.5			How big is the difference?
8	6.5			Mean ± SEM of column A	7.824 ± 0.04042 N=450
9.5	8			Mean ± SEM of column B	7.870 ± 0.04088 N=450
7	7.5			Difference between means	-0.04556 ± 0.05749
9	8			95% confidence interval	-0.1582 to 0.06712
9.5	9.5			R square	0.0006988
8.5	6.5
8	5.5			F test to compare variances
8	7			F,DFn, Dfd	1.023, 449, 449
8	7			P value	0.8116
8.5	7.5			P value summary	ns
8	6.5			Are variances significantly different?	No
6.5	6
7.5	6.5
9	7
9	7.5
8	7.5				Wildtype	Fz6 Mutant
8	8			Number of values	450	450
8	7
8.5	7.5			Minimum	5.5	5.5
7	8			25% Percentile	7.5	7.5
8.5	6.5			Median	8	8
9	8.5			75% Percentile	8.5	8.5
7.5	7			Maximum	10.5	10.5
8	8.5
7	7.5			Mean	7.824	7.87
8.5	8			Std. Deviation	0.8575	0.8672
8	7.5			Std. Error	0.04042	0.04088
8.5	6.5
8.5	7.5			Lower 95% CI	7.745	7.79
9	7			Upper 95% CI	7.904	7.95
8	7.5
7.5	8
8	7.5
7	7.5
8	8
9	7.5
9	7
8	6.5
7.5	6.5
8	6
7.5	7
8	9
7	8.5
8	8.5
9	8.5
8.5	9
7	7.5
8	7
7	7
7.5	6.5
8.5	5.5
9	8
7	6.5
7.5	8
7.5	8
8	7
8.5	7.5
9.5	7.5
7	7.5
7.5	7
7.5	6.5
9	6
8	6.5
9	7.5
7.5	7.5
8.5	7.5
7.5	6.5
8.5	8
7.5	7.5
9.5	8.5
9	8.5
8.5	6.5
8	8
8	7.5
7.5	7.5
7.5	7.5
7.5	8
10	7.5
7	7.5
8.5	7
8.5	7.5
9	7.5
9.5	8
8.5	7.5
9.5	9
8	8
9	8
8	9
7.5	8.5
8	7
7	8.5
8	8.5
7.5	7.5
7	8
9	7
8.5	7.5
7	8
7	7.5
7.5	9
7.5	9
7.5	8.5
9.5	9
8	8
9.5	7.5
8	8.5
9	9
9.5	6
9	7.5
9	8
7.5	8
8	7.5
8	7.5
8.5	7.5
8.5	9
8.5	7.5
8	8.5
7.5	7.5
9	6
6.5	7.5
7.5	9
7.5	8.5
6.5	8.5
9.5	9
8	8
7.5	7.5
8	7.5
9	9
9	8
8	8.5
8	8
8	7
9.5	9.5
8.5	7.5
8	7.5
8	8.5
8	8
7	7
6.5	8
6.5	7
6	7
5.5	7
6	7
6	7
7	7.5
6	8
6.5	8
6.5	7
7	5.5
6.5	8
6.5	7.5
7	7.5
7	7.5
7	7
6.5	7
6.5	6.5
7.5	7.5
7	8
7	8
9.5	7.5
6	8
8	8.5
7.5	7.5
7	7
8	7
7	7.5
8	7.5
6.5	7
6.5	8.5
7	6.5
6.5	7
8	8
6.5	8
9	7
7	7
8	9
6.5	8
6	7
5.5	6.5
7.5	8
7	6.5
7	7
7.5	8
7	8.5
6.5	7.5
7.5	8.5
7.5	9
8	8
7	8.5
7.5	8
8	7.5
6	7
7.5	7.5
8.5	9
9.5	9
6.5	9
8	10
7	8.5
7	9.5
8	7.5
7	7
6.5	6.5
6	7.5
7.5	7.5
8	8
6	7.5
8.5	6
7	8
8	7.5
6.5	7
8	6
7.5	7.5
8	7.5
8	9
8	8.5
9	8
8	8
7.5	8
7.5	9
7	9
6.5	7.5
7	9.5
7.5	8
7.5	7.5
8	8
7.5	9
8	7.5
9	8.5
9	7.5
8	9.5
7.5	8
7.5	8
8.5	8
8	7.5
7	8.5
8	9.5
7	9
8	8.5
7.5	9.5
8	8
8	9
9.5	9
9	8
9	8.5
8.5	6.5
7.5	6
9	8
8	7.5
8	9
7.5	8
8.5	9
8	8.5
9	8
8.5	7
8	7
7	8.5
8	7.5
7.5	8.5
8.5	9
6	8.5
8	9
8	8.5
7	8
8.5	9
8	9
9	8
8	7.5
8	6
9	8
9.5	8
7	8
8.5	8
7.5	7.5
7	7.5
8	6.5
8	8
7.5	7.5
9	8.5
8	8
8.5	10
8.5	8
8	8.5
9	8
9	7.5
9	7.5
10.5	7.5
10.5	8
7.5	7
6	7.5
8	8.5
7.5	9
7.5	8
7.5	10
8	7.5
8	9.5
7.5	9.5
7.5	10
7.5	9.5
7.5	9.5
7	8
7.5	9
8	7
7.5	7
8	7.5
8.5	8
8	7.5
8.5	7.5
7	8
8	7.5
7.5	6.5
8	7.5
7.5	7.5
9	8
8.5	8
7	6
6.5	6.5
7.5	5.5
8	6.5
7.5	10
7.5	7.5
8.5	8
8	7.5
8	8
8.5	7.5
8	7
9	8.5
8.5	9.5
7	8.5
8.5	10.5
8.5	8
6	7.5
8.5	7
9.5	7.5
10	8
7.5	9
7	9
7.5	8
8.5	7.5
8	8.5
7.5	6.5
8	7.5
8.5	7
7.5	8.5
8.5	8
8.5	7.5
7	8.5
7.5	8.5
9	9.5
8.5	8.5
8.5	8
8	9.5
8	8
8	7.5
8	8.5
8	9.5
8.5	8.5
6.5	9.5
8	9
9	8
8	8.5
7.5	8.5
7.5	8.5
8.5	8
10	8
8.5	7.5
8.5	8
8	8
9	7.5
8.5	8.5
8	8.5
9	8
7.5	7
9	8.5
8.5	9
7	9.5
7.5	7.5
7.5	8
8.5	8
8.5	7.5
8.5	7.5
9	9
8.5	8.5
7.5	8
7.5	8
7.5	9
7	8
6	8.5
7	8.5
8	8
8	8
6.5	8.5
8.5	10
8.5	7.5
8.5	8
8.5	8
8	8
7.5	7.5
7.5	10
7	8
6.5	8
7.5	8
7.5	7.5
7	8.5
7	7
7.5	8.5
7.5	8
7	8.5
8	7
7.5	7.5
8.5	7
7	8
7	8
7	8
6	7
7	9
6	8
8	8.5
7.5	7.5
7	7.5
7.5	7
7.5	8.5
7.5	9
7.5	9
7.5	10
6.5	9
7.5	7.5
7	8
7	7.5
7.5	9
8	7.5
7	7
8	9
7.5	7
7.5	8.5
7	9.5
7	8
8	7.5

## Sheet: 5S1D
Wildtype	Fz6 mutant			Statistics:
144	130			Parameter
146	145			Table Analyzed	Fz6CellDensity
144	145			Column A	Wildtype
133	151			vs	vs
145	143			Column B	Fz6 mutant
136	144
153	159			Unpaired t test
144	167			P value	0.1739
161	146			P value summary	ns
158	162			Are means signif. different? (P < 0.05)	No
145	173			One- or two-tailed P value?	Two-tailed
149	162			t, df	t=1.395 df=28
157	166
172	153			How big is the difference?
147	176			Mean ± SEM of column A	148.9 ± 2.562 N=15
				Mean ± SEM of column B	154.8 ± 3.334 N=15
				Difference between means	-5.867 ± 4.205
				95% confidence interval	-14.48 to 2.745
				R square	0.065
				F test to compare variances
				F,DFn, Dfd	1.693, 14, 14
				P value	0.336
				P value summary	ns
				Are variances significantly different?	No
					Wildtype	Fz6 mutant
				Number of values	15	15
				Minimum	133	130
				25% Percentile	144	145
				Median	146	153
				75% Percentile	157	166
				Maximum	172	176
				Mean	148.9	154.8
				Std. Deviation	9.924	12.91
				Std. Error	2.562	3.334
				Lower 95% CI	143.4	147.6
				Upper 95% CI	154.4	162
