# Supplementary material for: Epithelial geometry regulates spindle orientation and progenitor fate during formation of the mammalian epidermis
Source: eLife journal article supplement (doi:10.7554/elife.47102), 2019-06-12
Supplement: supp [file Fig5Supp1DivisionAngles.xlsx]

## Sheet: Fz6Angles
Item	Source	Length xyz	Length xy	Height	ND.T	ND.Z	ND.M	Comment		sin theta	angle_radians	angle_degrees
1	e14WT_dapi_vangl2_mtmg_celsr1_015.nd2	10.73	10.69	1	0	0	0			0.0931966	0.0933321	5.34753
2	e14WT_dapi_vangl2_mtmg_celsr1_015.nd2	6.32	3.1	5.5	0	0	0			0.870253	1.05572	60.4881
3	e14WT_dapi_vangl2_mtmg_celsr1_015.nd2	11.43	11.39	1	0	0	0			0.0874891	0.0876011	5.01917
4	e14WT_dapi_vangl2_mtmg_celsr1_014.nd2	10.46	10.45	0.5	0	0	0			0.0478011	0.0478194	2.73985
5	e14WT_dapi_vangl2_mtmg_celsr1_014.nd2	8.93	8.87	1	0	0	0			0.111982	0.112217	6.42959
6	e14WT_dapi_vangl2_mtmg_celsr1_014.nd2	7.29	4.14	6	0	0	0			0.823045	0.966752	55.3908
7	e14WT_dapi_vangl2_mtmg_celsr1_013.nd2	11.29	11.25	1	0	0	0			0.088574	0.0886902	5.08157
8	e14WT_dapi_vangl2_mtmg_celsr1_013.nd2	9.32	9.27	1	0	0	0			0.107296	0.107503	6.15947
9	e14WT_dapi_vangl2_mtmg_celsr1_013.nd2	11.97	11.93	1	0	0	0			0.0835422	0.0836397	4.7922
10	e14WT_dapi_vangl2_mtmg_celsr1_012.nd2	11.27	11.26	0.5	0	0	0			0.0443656	0.0443801	2.54279
11	e14WT_dapi_vangl2_mtmg_celsr1_012.nd2	9.91	9.9	0.5	0	0	0			0.0504541	0.0504755	2.89203
12	e14WT_dapi_vangl2_mtmg_celsr1_012.nd2	11.05	10.76	2.5	0	0	0			0.226244	0.22822	13.0761
13	e14WT_dapi_vangl2_mtmg_celsr1_012.nd2	7.24	5.68	4.5	0	0	0			0.621547	0.670716	38.4292
14	e14WT_dapi_vangl2_mtmg_celsr1_011.nd2	7.47	7.47	0	0	0	0			0	0	0
15	e14WT_dapi_vangl2_mtmg_celsr1_011.nd2	7.14	5.92	4	0	0	0			0.560224	0.594656	34.0713
16	e14WT_dapi_vangl2_mtmg_celsr1_011.nd2	7.95	7.93	0.5	0	0	0			0.0628931	0.0629346	3.60589
17	e14WT_dapi_vangl2_mtmg_celsr1_010.nd2	10.24	10.24	0	0	0	0			0	0	0
18	e14WT_dapi_vangl2_mtmg_celsr1_009.nd2	7.6	7.46	1.5	0	0	0			0.197368	0.198673	11.3831
19	e14WT_dapi_vangl2_mtmg_celsr1_008.nd2	7.5	6.63	3.5	0	0	0			0.466667	0.485518	27.8181
20	e14WT_dapi_vangl2_mtmg_celsr1_008.nd2	12.35	12.35	0	0	0	0			0	0	0
21	e14WT_dapi_vangl2_mtmg_celsr1_007.nd2	10.89	10.89	0	0	0	0			0	0	0
22	e14WT_dapi_vangl2_mtmg_celsr1_007.nd2	9.77	9.76	0.5	0	0	0			0.0511771	0.0511994	2.93351
23	e14WT_dapi_vangl2_mtmg_celsr1_007.nd2	11.3	10.89	3	0	0	0			0.265487	0.268709	15.3959
24	e14WT_dapi_vangl2_mtmg_celsr1_007.nd2	7.65	6.19	4.5	0	0	0			0.588235	0.628875	36.0319
25	e14WT_dapi_vangl2_mtmg_celsr1_007.nd2	9.4	9.34	1	0	0	0			0.106383	0.106585	6.10685
26	e14WT_dapi_vangl2_mtmg_celsr1_007.nd2	9.22	9.1	1.5	0	0	0			0.16269	0.163416	9.36306
27	e14WT_dapi_vangl2_mtmg_celsr1_006.nd2	10.67	10.24	3	0	0	0			0.281162	0.285005	16.3296
28	e14WT_dapi_vangl2_mtmg_celsr1_006.nd2	9.46	4.14	8.5	0	0	0			0.89852	1.11639	63.9642
29	e14WT_dapi_vangl2_mtmg_celsr1_006.nd2	9.19	9.19	0	0	0	0			0	0	0
30	e14WT_dapi_vangl2_mtmg_celsr1_005.nd2	0.5	0	0.5	0	0	0			1	1.5708	90
31	e14WT_dapi_vangl2_mtmg_celsr1_005.nd2	7.17	4.6	5.5	0	0	0			0.767085	0.874285	50.0928
32	e14WT_dapi_vangl2_mtmg_celsr1_005.nd2	9.93	9.61	2.5	0	0	0			0.251762	0.254501	14.5818
33	e14WT_dapi_vangl2_mtmg_celsr1_005.nd2	10.68	10.63	1	0	0	0			0.093633	0.0937703	5.37264
34	e14WT_dapi_vangl2_mtmg_celsr1_005.nd2	6.82	6.35	2.5	0	0	0			0.366569	0.375319	21.5042
35	e14WT_dapi_vangl2_mtmg_celsr1_005.nd2	7.55	7.4	1.5	0	0	0			0.198675	0.200006	11.4595
36	e14WT_dapi_vangl2_mtmg_celsr1_004.nd2	7.63	4.71	6	0	0	0			0.78637	0.90491	51.8475
37	e14WT_dapi_vangl2_mtmg_celsr1_004.nd2	8.75	8.22	3	0	0	0			0.342857	0.349957	20.051
38	e14WT_dapi_vangl2_mtmg_celsr1_003.nd2	11.3	11.12	2	0	0	0			0.176991	0.177928	10.1946
39	e14WT_dapi_vangl2_mtmg_celsr1_003.nd2	10.29	10.28	0.5	0	0	0			0.0485909	0.04861	2.78515
40	e14WT_dapi_vangl2_mtmg_celsr1_003.nd2	12.45	12.41	1	0	0	0			0.0803213	0.0804079	4.60703
41	e14WT_dapi_vangl2_mtmg_celsr1_003.nd2	11.67	11.63	1	0	0	0			0.0856898	0.085795	4.91569
42	e14WT_dapi_vangl2_mtmg_celsr1_002.nd2	7.02	7	0.5	0	0	0			0.0712251	0.0712854	4.08435
43	e14WT_dapi_vangl2_mtmg_celsr1_002.nd2	9.56	7.81	5.5	0	0	0			0.575314	0.612988	35.1216
44	e14WT_dapi_vangl2_mtmg_celsr1_001.nd2	6.04	5.24	3	0	0	0			0.496689	0.519779	29.7812
45	e14WT_dapi_vangl2_mtmg_celsr1_001.nd2	7.27	7.25	0.5	0	0	0			0.0687758	0.0688301	3.94368
46	e14WT_dapi_vangl2_mtmg_celsr1_001.nd2	10.8	10.8	0	0	0	0			0	0	0
47	e14WT2_dapi_vangl2_mtmg_celsr1_001.nd2	7.81	5.99	5	0	0	0			0.640205	0.694765	39.8071
48	e14WT2_dapi_vangl2_mtmg_celsr1_001.nd2	9.23	7.75	5	0	0	0			0.541712	0.572472	32.8002
49	e14WT2_dapi_vangl2_mtmg_celsr1_001.nd2	10.03	8.39	5.5	0	0	0			0.548355	0.580396	33.2542
50	e14WT2_dapi_vangl2_mtmg_celsr1_001.nd2	9.6	7.5	6	0	0	0			0.625	0.675132	38.6822
51	e14WT2_dapi_vangl2_mtmg_celsr1_002.nd2	10.47	9.87	3.5	0	0	0			0.334288	0.34085	19.5293
52	e14WT2_dapi_vangl2_mtmg_celsr1_002.nd2	8.87	8.87	0	0	0	0			0	0	0
53	e14WT2_dapi_vangl2_mtmg_celsr1_002.nd2	10.17	10.12	1	0	0	0			0.0983284	0.0984876	5.64292
54	e14WT2_dapi_vangl2_mtmg_celsr1_002.nd2	6.48	2.44	6	0	0	0			0.925926	1.18348	67.8084
55	e14WT2_dapi_vangl2_mtmg_celsr1_003.nd2	11.45	11.44	0.5	0	0	0			0.0436681	0.043682	2.50279
56	e14WT2_dapi_vangl2_mtmg_celsr1_003.nd2	10.18	10.18	0	0	0	0			0	0	0
57	e14WT2_dapi_vangl2_mtmg_celsr1_003.nd2	8.46	7.46	4	0	0	0			0.472813	0.492481	28.2171
58	e14WT2_dapi_vangl2_mtmg_celsr1_003.nd2	10.7	10.51	2	0	0	0			0.186916	0.188022	10.7729
59	e14WT2_dapi_vangl2_mtmg_celsr1_004.nd2	9.77	9.76	0.5	0	0	0			0.0511771	0.0511994	2.93351
60	e14WT2_dapi_vangl2_mtmg_celsr1_004.nd2	9.36	9.15	2	0	0	0			0.213675	0.215336	12.3378
61	e14WT2_dapi_vangl2_mtmg_celsr1_004.nd2	7.17	3.93	6	0	0	0			0.83682	0.991449	56.8058
62	e14WT2_dapi_vangl2_mtmg_celsr1_004.nd2	9.57	9.09	3	0	0	0			0.31348	0.318855	18.2691
63	e14WT2_dapi_vangl2_mtmg_celsr1_004.nd2	11.32	11.28	1	0	0	0			0.0883392	0.0884545	5.06807
64	e14WT2_dapi_vangl2_mtmg_celsr1_005.nd2	7.49	7.06	2.5	0	0	0			0.333778	0.340309	19.4983
65	e14WT2_dapi_vangl2_mtmg_celsr1_005.nd2	9.81	9.81	0	0	0	0			0	0	0
66	e14WT2_dapi_vangl2_mtmg_celsr1_005.nd2	9.83	9.51	2.5	0	0	0			0.254323	0.257148	14.7335
67	e14WT2_dapi_vangl2_mtmg_celsr1_006.nd2	7.68	7.53	1.5	0	0	0			0.195312	0.196576	11.263
68	e14WT2_dapi_vangl2_mtmg_celsr1_006.nd2	9.39	9.38	0.5	0	0	0			0.0532481	0.0532733	3.05234
69	e14WT2_dapi_vangl2_mtmg_celsr1_006.nd2	9.54	7.41	6	0	0	0			0.628931	0.680177	38.9713
70	e14WT2_dapi_vangl2_mtmg_celsr1_007.nd2	9.01	9	0.5	0	0	0			0.0554939	0.0555224	3.1812
71	e14WT2_dapi_vangl2_mtmg_celsr1_007.nd2	6.33	3.88	5	0	0	0			0.789889	0.910629	52.1752
72	e14WT2_dapi_vangl2_mtmg_celsr1_007.nd2	10.11	10.1	0.5	0	0	0			0.049456	0.0494762	2.83478
73	e14WT2_dapi_vangl2_mtmg_celsr1_007.nd2	8.23	7.2	4	0	0	0			0.486027	0.507538	29.0798
74	e14WT2_dapi_vangl2_mtmg_celsr1_007.nd2	8.26	6.57	5	0	0	0			0.605327	0.650176	37.2524
75	e14WT2_dapi_vangl2_mtmg_celsr1_007.nd2	9.32	7.86	5	0	0	0			0.536481	0.566261	32.4444
76	e14WT2_dapi_vangl2_mtmg_celsr1_007.nd2	6.25	1.76	6	0	0	0			0.96	1.287	73.7398
77	e14WT2_dapi_vangl2_mtmg_celsr1_007.nd2	7.48	7.33	1.5	0	0	0			0.200535	0.201904	11.5682
78	e14WT2_dapi_vangl2_mtmg_celsr1_007.nd2	8.94	8.94	0	0	0	0			0	0	0
79	e14WT2_dapi_vangl2_mtmg_celsr1_008.nd2	9.31	9.31	0	0	0	0			0	0	0
80	e14WT2_dapi_vangl2_mtmg_celsr1_008.nd2	8.49	8.49	0	0	0	0			0	0	0
81	e14WT2_dapi_vangl2_mtmg_celsr1_008.nd2	8.31	7.92	2.5	0	0	0			0.300842	0.305576	17.5082
82	e14WT2_dapi_vangl2_mtmg_celsr1_009.nd2	10.87	10.86	0.5	0	0	0			0.0459982	0.0460144	2.63643
83	e14WT2_dapi_vangl2_mtmg_celsr1_010.nd2	7.52	7.46	1	0	0	0			0.132979	0.133374	7.64176
84	e14WT2_dapi_vangl2_mtmg_celsr1_010.nd2	10.77	10.73	1	0	0	0			0.0928505	0.0929844	5.32762
85	e14WT2_dapi_vangl2_mtmg_celsr1_010.nd2	6.54	5.53	3.5	0	0	0			0.535168	0.564707	32.3553
86	e14WT2_dapi_vangl2_mtmg_celsr1_010.nd2	8.9	6.57	6	0	0	0			0.674157	0.739823	42.3887
87	e14WT2_dapi_vangl2_mtmg_celsr1_010.nd2	6.45	6.27	1.5	0	0	0			0.232558	0.234707	13.4477
88	e14WT2_dapi_vangl2_mtmg_celsr1_010.nd2	8.04	5.86	5.5	0	0	0			0.68408	0.753341	43.1633
89	e14WT2_dapi_vangl2_mtmg_celsr1_011.nd2	9.36	9.34	0.5	0	0	0			0.0534188	0.0534442	3.06213
90	e14WT2_dapi_vangl2_mtmg_celsr1_011.nd2	8.76	7.2	5	0	0	0			0.570776	0.607451	34.8044
91	e14WT2_dapi_vangl2_mtmg_celsr1_012.nd2	8.99	6.69	6	0	0	0			0.667408	0.730723	41.8673
92	e14WT2_dapi_vangl2_mtmg_celsr1_012.nd2	9.17	8.48	3.5	0	0	0			0.381679	0.391613	22.4377
93	e14WT2_dapi_vangl2_mtmg_celsr1_012.nd2	9.81	9.8	0.5	0	0	0			0.0509684	0.0509905	2.92154
94	e14WT2_dapi_vangl2_mtmg_celsr1_013.nd2	9.72	9.67	1	0	0	0			0.102881	0.103063	5.90508
95	e14WT2_dapi_vangl2_mtmg_celsr1_013.nd2	6.71	1.66	6.5	0	0	0			0.968703	1.31995	75.6277
96	e14WT2_dapi_vangl2_mtmg_celsr1_014.nd2	13.16	13.12	1	0	0	0			0.0759878	0.0760612	4.35798
97	e14WT2_dapi_vangl2_mtmg_celsr1_014.nd2	8.78	7.81	4	0	0	0			0.455581	0.473025	27.1023
98	e14WT2_dapi_vangl2_mtmg_celsr1_014.nd2	9.61	9.6	0.5	0	0	0			0.0520291	0.0520526	2.9824
99	e14WT2_dapi_vangl2_mtmg_celsr1_015.nd2	6.61	2.76	6	0	0	0			0.907716	1.13781	65.1915
100	e14WT2_dapi_vangl2_mtmg_celsr1_015.nd2	8.04	0.81	8	0	0	0			0.995025	1.471	84.2823
101	e14WT2_dapi_vangl2_mtmg_celsr1_015.nd2	6.21	5.69	2.5	0	0	0			0.402576	0.41433	23.7393
102	e14WT3_dapi_vangl2_mtmg_celsr1_001.nd2	6.93	6.86	1	0	0	0			0.1443	0.144806	8.29675
103	e14WT3_dapi_vangl2_mtmg_celsr1_001.nd2	6.92	5.65	4	0	0	0			0.578035	0.616318	35.3124
104	e14WT3_dapi_vangl2_mtmg_celsr1_001.nd2	9.46	8.97	3	0	0	0			0.317125	0.322696	18.4891
105	e14WT3_dapi_vangl2_mtmg_celsr1_001.nd2	7.23	7.16	1	0	0	0			0.138313	0.138757	7.95021
106	e14WT3_dapi_vangl2_mtmg_celsr1_001.nd2	9.06	7.56	5	0	0	0			0.551876	0.584613	33.4958
107	e14WT3_dapi_vangl2_mtmg_celsr1_002.nd2	10.08	10.08	0	0	0	0			0	0	0
108	e14WT3_dapi_vangl2_mtmg_celsr1_002.nd2	11.4	11.4	0	0	0	0			0	0	0
109	e14WT3_dapi_vangl2_mtmg_celsr1_002.nd2	11.34	11.07	2.5	0	0	0			0.220459	0.222285	12.736
110	e14WT3_dapi_vangl2_mtmg_celsr1_002.nd2	9.36	9.34	0.5	0	0	0			0.0534188	0.0534442	3.06213
111	e14WT3_dapi_vangl2_mtmg_celsr1_003.nd2	8.72	7.14	5	0	0	0			0.573394	0.610643	34.9873
112	e14WT3_dapi_vangl2_mtmg_celsr1_003.nd2	8.15	6.01	5.5	0	0	0			0.674847	0.740757	42.4422
113	e14WT3_dapi_vangl2_mtmg_celsr1_003.nd2	10.5	10.5	0	0	0	0			0	0	0
114	e14WT3_dapi_vangl2_mtmg_celsr1_003.nd2	11.86	10.76	5	0	0	0			0.421585	0.435193	24.9347
115	e14WT3_dapi_vangl2_mtmg_celsr1_003.nd2	11.77	11.73	1	0	0	0			0.0849618	0.0850643	4.87383
116	e14WT3_dapi_vangl2_mtmg_celsr1_003.nd2	6.39	3.25	5.5	0	0	0			0.86072	1.03668	59.3975
117	e14WT3_dapi_vangl2_mtmg_celsr1_004.nd2	9.27	7.8	5	0	0	0			0.539374	0.569694	32.6411
118	e14WT3_dapi_vangl2_mtmg_celsr1_004.nd2	9.8	8.95	4	0	0	0			0.408163	0.420441	24.0895
119	e14WT3_dapi_vangl2_mtmg_celsr1_004.nd2	9.66	9.61	1	0	0	0			0.10352	0.103705	5.94189
120	e14WT3_dapi_vangl2_mtmg_celsr1_004.nd2	10.96	10.77	2	0	0	0			0.182482	0.18351	10.5143
121	e14WT3_dapi_vangl2_mtmg_celsr1_004.nd2	8.84	6.92	5.5	0	0	0			0.622172	0.671514	38.4749
122	e14WT3_dapi_vangl2_mtmg_celsr1_005.nd2	8.1	7.71	2.5	0	0	0			0.308642	0.313765	17.9774
123	e14WT3_dapi_vangl2_mtmg_celsr1_005.nd2	6.98	6.04	3.5	0	0	0			0.501433	0.525254	30.0948
124	e14WT3_dapi_vangl2_mtmg_celsr1_005.nd2	7.57	5.2	5.5	0	0	0			0.726552	0.813291	46.5981
125	e14WT3_dapi_vangl2_mtmg_celsr1_005.nd2	9.74	9.53	2	0	0	0			0.205339	0.20681	11.8493
126	e14WT3_dapi_vangl2_mtmg_celsr1_005.nd2	10.04	9.2	4	0	0	0			0.398406	0.409779	23.4786
127	e14WT3_dapi_vangl2_mtmg_celsr1_006.nd2	8.11	7.54	3	0	0	0			0.369914	0.378916	21.7103
128	e14WT3_dapi_vangl2_mtmg_celsr1_006.nd2	8.74	7.17	5	0	0	0			0.572082	0.609042	34.8956
129	e14WT3_dapi_vangl2_mtmg_celsr1_006.nd2	7.57	6.09	4.5	0	0	0			0.594452	0.636584	36.4736
130	e14WT3_dapi_vangl2_mtmg_celsr1_007.nd2	7.95	5.75	5.5	0	0	0			0.691824	0.764012	43.7747
131	e14WT3_dapi_vangl2_mtmg_celsr1_007.nd2	7.42	7.27	1.5	0	0	0			0.202156	0.203559	11.6631
132	e14WT3_dapi_vangl2_mtmg_celsr1_007.nd2	8.34	8.28	1	0	0	0			0.119904	0.120193	6.88657
133	e14WT3_dapi_vangl2_mtmg_celsr1_008.nd2	9.45	8.78	3.5	0	0	0			0.37037	0.379408	21.7385
134	e14WT3_dapi_vangl2_mtmg_celsr1_008.nd2	10.83	10.73	1.5	0	0	0			0.138504	0.138951	7.9613
135	e14WT3_dapi_vangl2_mtmg_celsr1_008.nd2	5.69	3.48	4.5	0	0	0			0.790861	0.912215	52.2661
136	e14WT3_dapi_vangl2_mtmg_celsr1_008.nd2	10.89	10.85	1	0	0	0			0.0918274	0.0919569	5.26874
137	e14WT3_dapi_vangl2_mtmg_celsr1_009.nd2	8.17	4.95	6.5	0	0	0			0.795594	0.919987	52.7114
138	e14WT3_dapi_vangl2_mtmg_celsr1_009.nd2	9.37	9.35	0.5	0	0	0			0.0533618	0.0533871	3.05886
139	e14WT3_dapi_vangl2_mtmg_celsr1_009.nd2	7.52	6.37	4	0	0	0			0.531915	0.56086	32.1349
140	e14WT3_dapi_vangl2_mtmg_celsr1_009.nd2	9.83	8.97	4	0	0	0			0.406918	0.419077	24.0113
141	e14WT3_dapi_vangl2_mtmg_celsr1_010.nd2	7.14	2.94	6.5	0	0	0			0.910364	1.14416	65.5557
142	e14WT3_dapi_vangl2_mtmg_celsr1_010.nd2	5.99	5.99	0	0	0	0			0	0	0
143	e14WT3_dapi_vangl2_mtmg_celsr1_010.nd2	6.77	3.14	6	0	0	0			0.886263	1.08921	62.4073
144	e14WT3_dapi_vangl2_mtmg_celsr1_011.nd2	5.89	2.12	5.5	0	0	0			0.933786	1.20485	69.0329
145	e14WT3_dapi_vangl2_mtmg_celsr1_011.nd2	7.14	6.85	2	0	0	0			0.280112	0.283911	16.2669
146	e14WT3_dapi_vangl2_mtmg_celsr1_011.nd2	6.06	3.43	5	0	0	0			0.825083	0.970348	55.5969
147	e14WT3_dapi_vangl2_mtmg_celsr1_011.nd2	9.35	8.46	4	0	0	0			0.427807	0.442066	25.3285
148	e14WT3_dapi_vangl2_mtmg_celsr1_012.nd2	5.44	2.14	5	0	0	0			0.919118	1.16584	66.7974
149	e14WT3_dapi_vangl2_mtmg_celsr1_012.nd2	9.88	9.88	0	0	0	0			0	0	0
150	e14WT3_dapi_vangl2_mtmg_celsr1_012.nd2	6.56	5.2	4	0	0	0			0.609756	0.655753	37.5719
151	e14WT3_dapi_vangl2_mtmg_celsr1_012.nd2	7.45	5.52	5	0	0	0			0.671141	0.735747	42.1552
152	e14WT3_dapi_vangl2_mtmg_celsr1_012.nd2	7.91	6.82	4	0	0	0			0.505689	0.53018	30.3771
153	e14WT3_dapi_vangl2_mtmg_celsr1_012.nd2	10.23	10.23	0	0	0	0			0	0	0
154	e14WT3_dapi_vangl2_mtmg_celsr1_012.nd2	9.05	9.04	0.5	0	0	0			0.0552486	0.0552768	3.16713
155	e14WT3_dapi_vangl2_mtmg_celsr1_012.nd2	7.3	6.4	3.5	0	0	0			0.479452	0.50003	28.6496
156	e14WT3_dapi_vangl2_mtmg_celsr1_013.nd2	9.8	9.59	2	0	0	0			0.204082	0.205526	11.7757
157	e14WT3_dapi_vangl2_mtmg_celsr1_013.nd2	6.11	1.17	6	0	0	0			0.981997	1.38076	79.1115
158	e14WT3_dapi_vangl2_mtmg_celsr1_013.nd2	7.41	7.34	1	0	0	0			0.134953	0.135366	7.75589
159	e14WT3_dapi_vangl2_mtmg_celsr1_013.nd2	7.7	1.75	7.5	0	0	0			0.974026	1.34238	76.9126
160	e14WT3_dapi_vangl2_mtmg_celsr1_014.nd2	7.1	4.48	5.5	0	0	0			0.774648	0.886158	50.7731
161	e14WT3_dapi_vangl2_mtmg_celsr1_014.nd2	8.97	6.66	6	0	0	0			0.668896	0.732723	41.9819
162	e14WT3_dapi_vangl2_mtmg_celsr1_014.nd2	9.44	9.43	0.5	0	0	0			0.0529661	0.0529909	3.03615
163	e14WT3_dapi_vangl2_mtmg_celsr1_015.nd2	8.44	7.14	4.5	0	0	0			0.533175	0.562349	32.2203
164	e14WT3_dapi_vangl2_mtmg_celsr1_015.nd2	8.8	7.57	4.5	0	0	0			0.511364	0.536771	30.7547
165	e14WT3_dapi_vangl2_mtmg_celsr1_015.nd2	12.08	12.03	1	0	0	0			0.0827815	0.0828763	4.74846
166	e14WT3_dapi_vangl2_mtmg_celsr1_015.nd2	10.86	10.76	1.5	0	0	0			0.138122	0.138565	7.93916
167	e14WT3_dapi_vangl2_mtmg_celsr1_015.nd2	10.76	10.76	0	0	0	0			0	0	0
Item	Source	Length [µm] xyz	Length [µm] xy	Height [µm]	ND.T	ND.Z	ND.M	Comment		sin theta	angle_radians	angle_degrees
1	e14Fz6mut_dapi_vangl2_mtmg_celsr1_001.nd2	9.29	8.8	3	0	0	0			0.322928	0.328821	18.8401
2	e14Fz6mut_dapi_vangl2_mtmg_celsr1_001.nd2	11.65	11.37	2.5	0	0	0			0.214592	0.216274	12.3916
3	e14Fz6mut_dapi_vangl2_mtmg_celsr1_001.nd2	6.02	2.44	5.5	0	0	0			0.913621	1.1521	66.0107
4	e14Fz6mut_dapi_vangl2_mtmg_celsr1_001.nd2	7.75	6.91	3.5	0	0	0			0.451613	0.468572	26.8472
5	e14Fz6mut_dapi_vangl2_mtmg_celsr1_002.nd2	8.29	5.72	6	0	0	0			0.723764	0.809241	46.3661
6	e14Fz6mut_dapi_vangl2_mtmg_celsr1_002.nd2	10.75	10.65	1.5	0	0	0			0.139535	0.139992	8.02093
7	e14Fz6mut_dapi_vangl2_mtmg_celsr1_002.nd2	7.91	7.65	2	0	0	0			0.252845	0.255619	14.6459
8	e14Fz6mut_dapi_vangl2_mtmg_celsr1_002.nd2	7.01	6.99	0.5	0	0	0			0.0713267	0.0713873	4.09019
9	e14Fz6mut_dapi_vangl2_mtmg_celsr1_003.nd2	10.32	10.27	1	0	0	0			0.0968992	0.0970515	5.56064
10	e14Fz6mut_dapi_vangl2_mtmg_celsr1_003.nd2	7.58	7.31	2	0	0	0			0.263852	0.267014	15.2988
11	e14Fz6mut_dapi_vangl2_mtmg_celsr1_003.nd2	8.22	8.22	0	0	0	0			0	0	0
12	e14Fz6mut_dapi_vangl2_mtmg_celsr1_003.nd2	10.84	10.82	0.5	0	0	0			0.0461255	0.0461418	2.64373
13	e14Fz6mut_dapi_vangl2_mtmg_celsr1_003.nd2	12.19	12.14	1	0	0	0			0.0820345	0.0821267	4.70552
14	e14Fz6mut_dapi_vangl2_mtmg_celsr1_003.nd2	12.65	12.65	0	0	0	0			0	0	0
15	e14Fz6mut_dapi_vangl2_mtmg_celsr1_003.nd2	6.77	1.9	6.5	0	0	0			0.960118	1.28742	73.764
16	e14Fz6mut_dapi_vangl2_mtmg_celsr1_004.nd2	12.07	12.03	1	0	0	0			0.08285	0.0829451	4.75241
17	e14Fz6mut_dapi_vangl2_mtmg_celsr1_004.nd2	8.19	8.13	1	0	0	0			0.1221	0.122406	7.01332
18	e14Fz6mut_dapi_vangl2_mtmg_celsr1_004.nd2	9.3	8.81	3	0	0	0			0.322581	0.328455	18.8191
19	e14Fz6mut_dapi_vangl2_mtmg_celsr1_004.nd2	7.69	7.09	3	0	0	0			0.390117	0.400759	22.9618
20	e14Fz6mut_dapi_vangl2_mtmg_celsr1_004.nd2	8.14	7.09	4	0	0	0			0.4914	0.513697	29.4327
21	e14Fz6mut_dapi_vangl2_mtmg_celsr1_004.nd2	11.06	11.05	0.5	0	0	0			0.045208	0.0452234	2.59111
22	e14Fz6mut_dapi_vangl2_mtmg_celsr1_005.nd2	9.84	9.51	2.5	0	0	0			0.254065	0.256881	14.7182
23	e14Fz6mut_dapi_vangl2_mtmg_celsr1_005.nd2	8.53	8.51	0.5	0	0	0			0.0586166	0.0586503	3.36041
24	e14Fz6mut_dapi_vangl2_mtmg_celsr1_005.nd2	8.02	2.84	7.5	0	0	0			0.935162	1.20872	69.2543
25	e14Fz6mut_dapi_vangl2_mtmg_celsr1_006.nd2	5.63	1.18	5.5	0	0	0			0.976909	1.35548	77.6634
26	e14Fz6mut_dapi_vangl2_mtmg_celsr1_006.nd2	5.88	2.08	5.5	0	0	0			0.935374	1.20932	69.2887
27	e14Fz6mut_dapi_vangl2_mtmg_celsr1_006.nd2	7.02	6.73	2	0	0	0			0.2849	0.288902	16.5529
28	e14Fz6mut_dapi_vangl2_mtmg_celsr1_006.nd2	6	3.31	5	0	0	0			0.833333	0.985111	56.4427
29	e14Fz6mut_dapi_vangl2_mtmg_celsr1_006.nd2	8.07	6.33	5	0	0	0			0.619579	0.668206	38.2854
30	e14Fz6mut_dapi_vangl2_mtmg_celsr1_007.nd2	7.86	5.08	6	0	0	0			0.763359	0.868497	49.7612
31	e14Fz6mut_dapi_vangl2_mtmg_celsr1_007.nd2	9.91	9.9	0.5	0	0	0			0.0504541	0.0504755	2.89203
32	e14Fz6mut_dapi_vangl2_mtmg_celsr1_007.nd2	8.56	7.57	4	0	0	0			0.46729	0.486223	27.8585
33	e14Fz6mut_dapi_vangl2_mtmg_celsr1_008.nd2	6.85	5.89	3.5	0	0	0			0.510949	0.536288	30.7271
34	e14Fz6mut_dapi_vangl2_mtmg_celsr1_008.nd2	8.2	8.14	1	0	0	0			0.121951	0.122256	7.00473
35	e14Fz6mut_dapi_vangl2_mtmg_celsr1_008.nd2	12.06	12.05	0.5	0	0	0			0.0414594	0.0414713	2.37613
36	e14Fz6mut_dapi_vangl2_mtmg_celsr1_009.nd2	5.21	5.21	0	0	0	0			0	0	0
37	e14Fz6mut_dapi_vangl2_mtmg_celsr1_009.nd2	5.55	0.73	5.5	0	0	0			0.990991	1.43646	82.3033
38	e14Fz6mut_dapi_vangl2_mtmg_celsr1_009.nd2	10.05	9.59	3	0	0	0			0.298507	0.303128	17.368
39	e14Fz6mut_dapi_vangl2_mtmg_celsr1_010.nd2	8.12	6.76	4.5	0	0	0			0.554187	0.587386	33.6547
40	e14Fz6mut_dapi_vangl2_mtmg_celsr1_010.nd2	7.81	2.17	7.5	0	0	0			0.960307	1.2881	73.8028
41	e14Fz6mut_dapi_vangl2_mtmg_celsr1_010.nd2	7.75	6.31	4.5	0	0	0			0.580645	0.619521	35.4959
42	e14Fz6mut_dapi_vangl2_mtmg_celsr1_010.nd2	9.3	9.25	1	0	0	0			0.107527	0.107735	6.17277
43	e14Fz6mut_dapi_vangl2_mtmg_celsr1_010.nd2	9.93	9.92	0.5	0	0	0			0.0503525	0.0503738	2.8862
44	e14Fz6mut_dapi_vangl2_mtmg_celsr1_010.nd2	7.74	1.9	7.5	0	0	0			0.968992	1.32112	75.6946
45	e14Fz6mut_dapi_vangl2_mtmg_celsr1_010.nd2	5.38	1.98	5	0	0	0			0.929368	1.1927	68.3365
46	e14Fz6mut_dapi_vangl2_mtmg_celsr1_010.nd2	9.24	9.24	0	0	0	0			0	0	0
47	e14Fz6mut_dapi_vangl2_mtmg_celsr1_010.nd2	8.49	6.86	5	0	0	0			0.588928	0.629732	36.081
48	e14Fz6mut_dapi_vangl2_mtmg_celsr1_011.nd2	5.37	4.08	3.5	0	0	0			0.651769	0.709915	40.6751
49	e14Fz6mut_dapi_vangl2_mtmg_celsr1_012.nd2	8.08	8.02	1	0	0	0			0.123762	0.124081	7.10929
50	e14Fz6mut_dapi_vangl2_mtmg_celsr1_012.nd2	6.16	2.78	5.5	0	0	0			0.892857	1.10365	63.2345
51	e14Fz6mut_dapi_vangl2_mtmg_celsr1_012.nd2	9.72	9.67	1	0	0	0			0.102881	0.103063	5.90508
52	e14Fz6mut_dapi_vangl2_mtmg_celsr1_012.nd2	7.74	7.6	1.5	0	0	0			0.193798	0.195033	11.1745
53	e14Fz6mut_dapi_vangl2_mtmg_celsr1_013.nd2	7.42	2.46	7	0	0	0			0.943396	1.23273	70.63
54	e14Fz6mut_dapi_vangl2_mtmg_celsr1_013.nd2	9.45	9.45	0	0	0	0			0	0	0
55	e14Fz6mut_dapi_vangl2_mtmg_celsr1_013.nd2	5.55	5.53	0.5	0	0	0			0.0900901	0.0902124	5.16879
56	e14Fz6mut_dapi_vangl2_mtmg_celsr1_013.nd2	6.54	5.17	4	0	0	0			0.611621	0.658108	37.7068
57	e14Fz6mut_dapi_vangl2_mtmg_celsr1_014.nd2	9.95	8.88	4.5	0	0	0			0.452261	0.469299	26.8889
58	e14Fz6mut_dapi_vangl2_mtmg_celsr1_014.nd2	9.77	9.77	0	0	0	0			0	0	0
59	e14Fz6mut_dapi_vangl2_mtmg_celsr1_014.nd2	10.8	10.76	1	0	0	0			0.0925926	0.0927254	5.31277
60	e14Fz6mut_dapi_vangl2_mtmg_celsr1_014.nd2	7.61	7.54	1	0	0	0			0.131406	0.131787	7.55085
61	e14Fz6mut_dapi_vangl2_mtmg_celsr1_014.nd2	5.51	2.33	5	0	0	0			0.907441	1.13715	65.1541
62	e14Fz6mut_dapi_vangl2_mtmg_celsr1_015.nd2	10.52	10.47	1	0	0	0			0.095057	0.0952008	5.4546
63	e14Fz6mut_dapi_vangl2_mtmg_celsr1_015.nd2	8.75	6.37	6	0	0	0			0.685714	0.755585	43.2918
64	e14Fz6mut2_dapi_vangl2_mtmg_celsr1_001.nd2	5.62	2.57	5	0	0	0			0.88968	1.09664	62.833
65	e14Fz6mut2_dapi_vangl2_mtmg_celsr1_001.nd2	9.13	7.28	5.5	0	0	0			0.60241	0.646517	37.0427
66	e14Fz6mut2_dapi_vangl2_mtmg_celsr1_001.nd2	7.96	5.23	6	0	0	0			0.753769	0.853779	48.9179
67	e14Fz6mut2_dapi_vangl2_mtmg_celsr1_002.nd2	9.29	8.13	4.5	0	0	0			0.484392	0.505668	28.9726
68	e14Fz6mut2_dapi_vangl2_mtmg_celsr1_002.nd2	10.15	10.14	0.5	0	0	0			0.0492611	0.049281	2.82359
69	e14Fz6mut2_dapi_vangl2_mtmg_celsr1_002.nd2	12.38	12.37	0.5	0	0	0			0.0403877	0.0403987	2.31468
70	e14Fz6mut2_dapi_vangl2_mtmg_celsr1_002.nd2	11.78	11.77	0.5	0	0	0			0.0424448	0.0424576	2.43264
71	e14Fz6mut2_dapi_vangl2_mtmg_celsr1_003.nd2	7.41	6.98	2.5	0	0	0			0.337382	0.344134	19.7174
72	e14Fz6mut2_dapi_vangl2_mtmg_celsr1_003.nd2	5.39	5.17	1.5	0	0	0			0.278293	0.282017	16.1584
73	e14Fz6mut2_dapi_vangl2_mtmg_celsr1_003.nd2	7.39	6.5	3.5	0	0	0			0.473613	0.493389	28.2691
74	e14Fz6mut2_dapi_vangl2_mtmg_celsr1_004.nd2	6.21	1.6	6	0	0	0			0.966184	1.30999	75.0572
75	e14Fz6mut2_dapi_vangl2_mtmg_celsr1_004.nd2	9.06	9.06	0	0	0	0			0	0	0
76	e14Fz6mut2_dapi_vangl2_mtmg_celsr1_004.nd2	10.18	10.18	0	0	0	0			0	0	0
77	e14Fz6mut2_dapi_vangl2_mtmg_celsr1_004.nd2	5.48	3.74	4	0	0	0			0.729927	0.818215	46.8803
78	e14Fz6mut2_dapi_vangl2_mtmg_celsr1_005.nd2	7.49	7.49	0	0	0	0			0	0	0
79	e14Fz6mut2_dapi_vangl2_mtmg_celsr1_005.nd2	9.33	9.31	0.5	0	0	0			0.0535906	0.0536163	3.07199
80	e14Fz6mut2_dapi_vangl2_mtmg_celsr1_005.nd2	9.43	8.94	3	0	0	0			0.318134	0.32376	18.5501
81	e14Fz6mut2_dapi_vangl2_mtmg_celsr1_005.nd2	6.41	2.26	6	0	0	0			0.936037	1.2112	69.3964
82	e14Fz6mut2_dapi_vangl2_mtmg_celsr1_005.nd2	8.97	8.45	3	0	0	0			0.334448	0.34102	19.539
83	e14Fz6mut2_dapi_vangl2_mtmg_celsr1_005.nd2	9.11	8.99	1.5	0	0	0			0.164654	0.165407	9.47715
84	e14Fz6mut2_dapi_vangl2_mtmg_celsr1_005.nd2	8.44	8.2	2	0	0	0			0.236967	0.239243	13.7076
85	e14Fz6mut2_dapi_vangl2_mtmg_celsr1_006.nd2	8.79	8.73	1	0	0	0			0.113766	0.114012	6.53243
86	e14Fz6mut2_dapi_vangl2_mtmg_celsr1_006.nd2	9.82	9.81	0.5	0	0	0			0.0509165	0.0509385	2.91856
87	e14Fz6mut2_dapi_vangl2_mtmg_celsr1_006.nd2	12.04	12	1	0	0	0			0.0830565	0.0831523	4.76427
88	e14Fz6mut2_dapi_vangl2_mtmg_celsr1_006.nd2	9.3	9.29	0.5	0	0	0			0.0537634	0.0537894	3.0819
89	e14Fz6mut2_dapi_vangl2_mtmg_celsr1_006.nd2	7.27	3.25	6.5	0	0	0			0.894085	1.10638	63.3912
90	e14Fz6mut2_dapi_vangl2_mtmg_celsr1_007.nd2	6.47	3.42	5.5	0	0	0			0.850077	1.01613	58.2201
91	e14Fz6mut2_dapi_vangl2_mtmg_celsr1_007.nd2	4.81	1.7	4.5	0	0	0			0.935551	1.20982	69.3173
92	e14Fz6mut2_dapi_vangl2_mtmg_celsr1_007.nd2	7.3	5.75	4.5	0	0	0			0.616438	0.664211	38.0565
93	e14Fz6mut2_dapi_vangl2_mtmg_celsr1_007.nd2	5.52	0.51	5.5	0	0	0			0.996377	1.48564	85.1212
94	e14Fz6mut2_dapi_vangl2_mtmg_celsr1_007.nd2	7.63	3.04	7	0	0	0			0.917431	1.16158	66.5534
95	e14Fz6mut2_dapi_vangl2_mtmg_celsr1_008.nd2	4.47	3.71	2.5	0	0	0			0.559284	0.593522	34.0063
96	e14Fz6mut2_dapi_vangl2_mtmg_celsr1_008.nd2	8.24	7.46	3.5	0	0	0			0.424757	0.438694	25.1353
97	e14Fz6mut2_dapi_vangl2_mtmg_celsr1_009.nd2	8.43	5.36	6.5	0	0	0			0.771056	0.880497	50.4488
98	e14Fz6mut2_dapi_vangl2_mtmg_celsr1_009.nd2	8.05	7.8	2	0	0	0			0.248447	0.251077	14.3856
99	e14Fz6mut2_dapi_vangl2_mtmg_celsr1_009.nd2	7.33	2.17	7	0	0	0			0.95498	1.26959	72.7422
100	e14Fz6mut2_dapi_vangl2_mtmg_celsr1_010.nd2	6.15	3.58	5	0	0	0			0.813008	0.9493	54.3909
101	e14Fz6mut2_dapi_vangl2_mtmg_celsr1_010.nd2	5.73	5.53	1.5	0	0	0			0.26178	0.264866	15.1757
102	e14Fz6mut2_dapi_vangl2_mtmg_celsr1_010.nd2	8.99	7.47	5	0	0	0			0.556174	0.589774	33.7916
103	e14Fz6mut2_dapi_vangl2_mtmg_celsr1_011.nd2	6.06	3.43	5	0	0	0			0.825083	0.970348	55.5969
104	e14Fz6mut2_dapi_vangl2_mtmg_celsr1_011.nd2	8.38	5.29	6.5	0	0	0			0.775656	0.887754	50.8646
105	e14Fz6mut2_dapi_vangl2_mtmg_celsr1_011.nd2	6.03	5.69	2	0	0	0			0.331675	0.338078	19.3705
106	e14Fz6mut2_dapi_vangl2_mtmg_celsr1_011.nd2	7.69	4.81	6	0	0	0			0.780234	0.89504	51.282
107	e14Fz6mut2_dapi_vangl2_mtmg_celsr1_011.nd2	13.88	13.87	0.5	0	0	0			0.0360231	0.0360309	2.06442
108	e14Fz6mut2_dapi_vangl2_mtmg_celsr1_011.nd2	8.21	7.17	4	0	0	0			0.487211	0.508893	29.1574
109	e14Fz6mut2_dapi_vangl2_mtmg_celsr1_011.nd2	7.34	7.27	1	0	0	0			0.13624	0.136665	7.83032
110	e14Fz6mut2_dapi_vangl2_mtmg_celsr1_011.nd2	10.93	10.92	0.5	0	0	0			0.0457457	0.0457616	2.62195
111	e14Fz6mut2_dapi_vangl2_mtmg_celsr1_011.nd2	8.2	7.41	3.5	0	0	0			0.426829	0.440984	25.2665
112	e14Fz6mut2_dapi_vangl2_mtmg_celsr1_012.nd2	10.01	9.96	1	0	0	0			0.0999001	0.100067	5.73342
113	e14Fz6mut2_dapi_vangl2_mtmg_celsr1_013.nd2	7.95	5.75	5.5	0	0	0			0.691824	0.764012	43.7747
114	e14Fz6mut2_dapi_vangl2_mtmg_celsr1_013.nd2	7.06	6.99	1	0	0	0			0.141643	0.142121	8.14293
115	e14Fz6mut2_dapi_vangl2_mtmg_celsr1_013.nd2	9.62	9.61	0.5	0	0	0			0.0519751	0.0519985	2.97929
116	e14Fz6mut2_dapi_vangl2_mtmg_celsr1_013.nd2	7.86	7.27	3	0	0	0			0.381679	0.391613	22.4377
117	e14Fz6mut2_dapi_vangl2_mtmg_celsr1_013.nd2	8	8	0	0	0	0			0	0	0
118	e14Fz6mut2_dapi_vangl2_mtmg_celsr1_013.nd2	9	8.78	2	0	0	0			0.222222	0.224093	12.8396
119	e14Fz6mut2_dapi_vangl2_mtmg_celsr1_013.nd2	7.1	6.43	3	0	0	0			0.422535	0.436241	24.9947
120	e14Fz6mut2_dapi_vangl2_mtmg_celsr1_014.nd2	6.09	5.56	2.5	0	0	0			0.410509	0.423012	24.2368
121	e14Fz6mut2_dapi_vangl2_mtmg_celsr1_014.nd2	12.87	12.87	0	0	0	0			0	0	0
122	e14Fz6mut2_dapi_vangl2_mtmg_celsr1_014.nd2	8.25	8.24	0.5	0	0	0			0.0606061	0.0606432	3.4746
123	e14Fz6mut2_dapi_vangl2_mtmg_celsr1_014.nd2	9.3	9.3	0	0	0	0			0	0	0
124	e14Fz6mut2_dapi_vangl2_mtmg_celsr1_014.nd2	7.84	5.05	6	0	0	0			0.765306	0.871517	49.9342
125	e14Fz6mut2_dapi_vangl2_mtmg_celsr1_015.nd2	9.09	8.39	3.5	0	0	0			0.385039	0.39525	22.6461
126	e14Fz6mut2_dapi_vangl2_mtmg_celsr1_015.nd2	9.96	9.95	0.5	0	0	0			0.0502008	0.0502219	2.8775
127	e14Fz6mut2_dapi_vangl2_mtmg_celsr1_015.nd2	7.12	6.83	2	0	0	0			0.280899	0.284731	16.3139
128	e14Fz6mut3_dapi_vangl2_mtmg_celsr1_001.nd2	10.37	10.32	1	0	0	0			0.096432	0.0965821	5.53375
129	e14Fz6mut3_dapi_vangl2_mtmg_celsr1_001.nd2	7.1	1.18	7	0	0	0			0.985915	1.40276	80.3724
130	e14Fz6mut3_dapi_vangl2_mtmg_celsr1_002.nd2	9.24	9.11	1.5	0	0	0			0.162338	0.163059	9.34261
131	e14Fz6mut3_dapi_vangl2_mtmg_celsr1_002.nd2	5.55	5.17	2	0	0	0			0.36036	0.368654	21.1223
132	e14Fz6mut3_dapi_vangl2_mtmg_celsr1_002.nd2	6.88	6.19	3	0	0	0			0.436047	0.451201	25.8519
133	e14Fz6mut3_dapi_vangl2_mtmg_celsr1_002.nd2	9.53	8.65	4	0	0	0			0.419727	0.433145	24.8174
134	e14Fz6mut3_dapi_vangl2_mtmg_celsr1_003.nd2	9.28	9.26	0.5	0	0	0			0.0538793	0.0539054	3.08855
135	e14Fz6mut3_dapi_vangl2_mtmg_celsr1_003.nd2	10.51	10.5	0.5	0	0	0			0.0475737	0.0475917	2.7268
136	e14Fz6mut3_dapi_vangl2_mtmg_celsr1_003.nd2	10.07	10.07	0	0	0	0			0	0	0
137	e14Fz6mut3_dapi_vangl2_mtmg_celsr1_004.nd2	10.35	10.3	1	0	0	0			0.0966184	0.0967693	5.54447
138	e14Fz6mut3_dapi_vangl2_mtmg_celsr1_004.nd2	6.94	6.25	3	0	0	0			0.432277	0.447016	25.6121
139	e14Fz6mut3_dapi_vangl2_mtmg_celsr1_004.nd2	7.25	7.25	0	0	0	0			0	0	0
140	e14Fz6mut3_dapi_vangl2_mtmg_celsr1_004.nd2	9.33	9.33	0	0	0	0			0	0	0
141	e14Fz6mut3_dapi_vangl2_mtmg_celsr1_005.nd2	5.84	1.96	5.5	0	0	0			0.941781	1.22789	70.3528
142	e14Fz6mut3_dapi_vangl2_mtmg_celsr1_005.nd2	10.2	9.89	2.5	0	0	0			0.245098	0.247621	14.1876
143	e14Fz6mut3_dapi_vangl2_mtmg_celsr1_006.nd2	8.86	8.5	2.5	0	0	0			0.282167	0.286052	16.3896
144	e14Fz6mut3_dapi_vangl2_mtmg_celsr1_006.nd2	6.08	6.08	0	0	0	0			0	0	0
145	e14Fz6mut3_dapi_vangl2_mtmg_celsr1_007.nd2	7.88	7.06	3.5	0	0	0			0.444162	0.460239	26.3698
146	e14Fz6mut3_dapi_vangl2_mtmg_celsr1_007.nd2	5.78	4.94	3	0	0	0			0.519031	0.545717	31.2673
147	e14Fz6mut3_dapi_vangl2_mtmg_celsr1_007.nd2	6.81	3.23	6	0	0	0			0.881057	1.07809	61.7702
148	e14Fz6mut3_dapi_vangl2_mtmg_celsr1_008.nd2	9.16	8.65	3	0	0	0			0.327511	0.333668	19.1178
149	e14Fz6mut3_dapi_vangl2_mtmg_celsr1_008.nd2	9.61	9.59	0.5	0	0	0			0.0520291	0.0520526	2.9824
150	e14Fz6mut3_dapi_vangl2_mtmg_celsr1_008.nd2	5.54	3.24	4.5	0	0	0			0.812274	0.948041	54.3187
151	e14Fz6mut3_dapi_vangl2_mtmg_celsr1_008.nd2	7.19	3.08	6.5	0	0	0			0.904033	1.12911	64.6934
152	e14Fz6mut3_dapi_vangl2_mtmg_celsr1_009.nd2	7.67	6.83	3.5	0	0	0			0.456323	0.473859	27.1501
153	e14Fz6mut3_dapi_vangl2_mtmg_celsr1_009.nd2	7.52	6.89	3	0	0	0			0.398936	0.410356	23.5117
154	e14Fz6mut3_dapi_vangl2_mtmg_celsr1_010.nd2	8.47	6.83	5	0	0	0			0.590319	0.631454	36.1796
155	e14Fz6mut3_dapi_vangl2_mtmg_celsr1_011.nd2	7.48	7.48	0	0	0	0			0	0	0
156	e14Fz6mut3_dapi_vangl2_mtmg_celsr1_011.nd2	8.1	1.27	8	0	0	0			0.987654	1.4135	80.9875
157	e14Fz6mut3_dapi_vangl2_mtmg_celsr1_011.nd2	10.08	9.97	1.5	0	0	0			0.14881	0.149364	8.55794
158	e14Fz6mut3_dapi_vangl2_mtmg_celsr1_012.nd2	7.11	7.03	1	0	0	0			0.140647	0.141115	8.08529
159	e14Fz6mut3_dapi_vangl2_mtmg_celsr1_012.nd2	7.08	7.06	0.5	0	0	0			0.0706215	0.0706803	4.04968
160	e14Fz6mut3_dapi_vangl2_mtmg_celsr1_012.nd2	5.47	4.58	3	0	0	0			0.548446	0.580505	33.2605
161	e14Fz6mut3_dapi_vangl2_mtmg_celsr1_013.nd2	7.73	7.31	2.5	0	0	0			0.323415	0.329337	18.8696
162	e14Fz6mut3_dapi_vangl2_mtmg_celsr1_014.nd2	10.62	10.61	0.5	0	0	0			0.047081	0.0470984	2.69854
163	e14Fz6mut3_dapi_vangl2_mtmg_celsr1_014.nd2	9.79	9.74	1	0	0	0			0.102145	0.102324	5.86271
164	e14Fz6mut3_dapi_vangl2_mtmg_celsr1_014.nd2	10.02	9.82	2	0	0	0			0.199601	0.200951	11.5136
165	e14Fz6mut3_dapi_vangl2_mtmg_celsr1_014.nd2	8.15	8.15	0	0	0	0			0	0	0
166	e14Fz6mut3_dapi_vangl2_mtmg_celsr1_015.nd2	6.22	3.71	5	0	0	0			0.803859	0.933754	53.5002
167	e14Fz6mut3_dapi_vangl2_mtmg_celsr1_015.nd2	7.78	7.78	0	0	0	0			0	0	0
