# Supplementary material for: Epithelial geometry regulates spindle orientation and progenitor fate during formation of the mammalian epidermis
Source: eLife journal article supplement (doi:10.7554/elife.47102), 2019-06-12
Supplement: supp [file Fig6_FromPrism.xlsx]

## Sheet: 6B
Wildtype	M21 Mutant
139.331	99.8641
122.545	109.177
126.532	112.281
126.853	99.7243
141.334	104.386
112.059	89.692
138.341	114.66
126.459	108.143
119.288	102.302
111.559	102.81
169.415	91.0082
151.198	99.8486
171.978	96.6852
141.772	113.554
136.309	95.7067
Statistics:
Parameter
Table Analyzed	M21FloodArea
Column A	Wildtype
vs	vs
Column B	M21 Mutant
Unpaired t test
P value	< 0.0001
P value summary	***
Are means signif. different? (P < 0.05)	Yes
One- or two-tailed P value?	Two-tailed
t, df	t=6.475 df=28
How big is the difference?
Mean ± SEM of column A	135.7 ± 4.687 N=15
Mean ± SEM of column B	102.7 ± 2.004 N=15
Difference between means	33.01 ± 5.098
95% confidence interval	22.57 to 43.45
R square	0.5996
F test to compare variances
F,DFn, Dfd	5.472, 14, 14
P value	0.003
P value summary	**
Are variances significantly different?	Yes
	Wildtype	M21 Mutant
Number of values	15	15
Minimum	111.6	89.69
25% Percentile	122.5	96.69
Median	136.3	102.3
75% Percentile	141.8	109.2
Maximum	172	114.7
Mean	135.7	102.7
Std. Deviation	18.15	7.761
Std. Error	4.687	2.004
Lower 95% CI	125.6	98.36
Upper 95% CI	145.7	107

## Sheet: 6C
Control	Lp M21		Statistics:
5.5	9		Parameter
5.5	8		Table Analyzed	M21CellHeights
7.5	9		Column A	Control
7	8		vs	vs
7	9		Column B	Lp M21
7	9.5
6	9.5		Unpaired t test
6.5	7		P value	< 0.0001
7.5	10		P value summary	***
7	7.5		Are means signif. different? (P < 0.05)	Yes
6	10		One- or two-tailed P value?	Two-tailed
6	9		t, df	t=25.87 df=599
6.5	8.5
7	6.5		How big is the difference?
7	7.5		Mean ± SEM of column A	7.140 ± 0.04778 N=301
7.5	9		Mean ± SEM of column B	9.060 ± 0.05685 N=300
7	9		Difference between means	-1.920 ± 0.07424
7	8		95% confidence interval	-2.066 to -1.775
7.5	8.5		R square	0.5277
6.5	7
6.5	8.5		F test to compare variances
7.5	8.5		F,DFn, Dfd	1.411, 299, 300
7.5	8.5		P value	0.003
7.5	8		P value summary	**
7.5	8.5		Are variances significantly different?	Yes
7	8.5
7.5	9
8.5	8.5
6.5	9			Control	Lp M21
7.5	8.5		Number of values	301	300
7.5	10
6.5	9.5		Minimum	5	6
6	8		25% Percentile	6.5	8.5
5	8		Median	7	9
8	9		75% Percentile	7.75	10
7.5	7.5		Maximum	9.5	12
6.5	8
7.5	8.5		Mean	7.14	9.06
7.5	9		Std. Deviation	0.8289	0.9847
8	8		Std. Error	0.04778	0.05685
6.5	8.5
6.5	9		Lower 95% CI	7.046	8.948
7	10		Upper 95% CI	7.234	9.172
7.5	10.5
5.5	8.5
8	8
7	8
6.5	7
7	8.5
5	9
8	9.5
7	9.5
7.5	9
7.5	8
6	8.5
7	8.5
6.5	9.5
5	10.5
7.5	10
6	8.5
8.5	8
8	9.5
8.5	8.5
9	10.5
6.5	10
9.5	9
8	8.5
8	10
8	9
8	9
6	10
7.5	11
8.5	9
9.5	9
9	9.5
7.5	9.5
8	9
8	8.5
7.5	9.5
8	11.5
6	9
7.5	7.5
6.5	10.5
6.5	9.5
7	8
6	8
7	8.5
7.5	8
7.5	9.5
7	9.5
6.5	8.5
6	8.5
8	9
6	8.5
6.5	9
6	10.5
6.5	9.5
6.5	9.5
6.5	9.5
6.5	8.5
6.5	7
8	6.5
7	8.5
7.5	8.5
6.5	9
7	9.5
7.5	8.5
8	8
6.5	8.5
5.5	8.5
6.5	9
7	10
7	9.5
6.5	9
6	7
8	9.5
7.5	8.5
7.5	9.5
6.5	9.5
7.5	9.5
7	8.5
6	10
7	9
8	11
7	7
7.5	8.5
7.5	9.5
7	9
7	9.5
6.5	10.5
6.5	8
8	8.5
9	8
7	9
7.5	9.5
9	9
7	11
8	10
6	9
7	9
7	8.5
7.5	8.5
7	9.5
7	7
7	7
8	8
6.5	9.5
6.5	8.5
7	8.5
7	9
7	9
6.5	8
5.5	9
7	10
6.5	9
7	9.5
6.5	9
6.5	10.5
8	9.5
8.5	11.5
8	9
9	7.5
7	8
8	10.5
7.5	8.5
7.5	8.5
9	9.5
6	8.5
8.5	9
8	9
8	10
7	9
7	9.5
7	10
6.5	10
8	8.5
7	9
7	9
8	10
7.5	8.5
8	11
7.5	9.5
9.5	10
8	10.5
7.5	7.5
5.5	9.5
7	9.5
8	9
6.5	9.5
7.5	8.5
8.5	9
6	9
7.5	10
7.5	9.5
8	9
6.5	9
8.5	10
8	9
7	9.5
6	9.5
6.5	8
8	8
6	9
7	10
7	9
6	9
7	9
8	7
6	11
6	10
7	10
7	10
6	11
7	10
7	9
7	9
7	8
7	9
6	9
7	9
7	10
6	7
7	9
7	8
8	7
7	9
7	6
7	9
7	9
7	10
6	10
7	11
7	9
6	10
6	9
7	10
9	8
7	8
6	10
7	10
7	9
7	8
7	11
7	9
8	8
8	10
7	10
7	8
8	10
7	10
7	7
8	9
7	11
7	11
7	8
7	9
7	9
7	10
6	9
6	9
8	8
8	10
7	9
9	9
8	8
7	8
7	9
6	10
8	8
8	11
6	9
7	10
7	10
7	12
8	9
8	10
7	10
8	9
8	11
7	10
7	9
7	10
8	9
7	8
7	8
5	10
7	10
7	10
6	10
8	9
7	9
8	10
8	10
8	9
8	7
7	10
6	9
8	11
7	10
7	10
9

## Sheet: 6D
Wildtype	M21 mutant
136	186
155	190
159	174
150	200
137	192
184	232
139	132
153	145
171	183
170	188
111	221
116	210
93	209
133	144
145	208
Statistics:
Parameter
Table Analyzed	M21CellDensity
Column A	Wildtype
vs	vs
Column B	M21 mutant
Unpaired t test
P value	< 0.0001
P value summary	***
Are means signif. different? (P < 0.05)	Yes
One- or two-tailed P value?	Two-tailed
t, df	t=4.539 df=28
How big is the difference?
Mean ± SEM of column A	143.5 ± 6.248 N=15
Mean ± SEM of column B	187.6 ± 7.451 N=15
Difference between means	-44.13 ± 9.724
95% confidence interval	-64.05 to -24.22
R square	0.4239
F test to compare variances
F,DFn, Dfd	1.422, 14, 14
P value	0.5186
P value summary	ns
Are variances significantly different?	No
	Wildtype	M21 mutant
Number of values	15	15
Minimum	93	132
25% Percentile	133	174
Median	145	190
75% Percentile	159	209
Maximum	184	232
Mean	143.5	187.6
Std. Deviation	24.2	28.86
Std. Error	6.248	7.451
Lower 95% CI	130.1	171.6
Upper 95% CI	156.9	203.6
