# Supplementary material for: Epithelial geometry regulates spindle orientation and progenitor fate during formation of the mammalian epidermis
Source: eLife journal article supplement (doi:10.7554/elife.47102), 2019-06-12
Supplement: supp [file Fig7_FromPrism.xlsx]

## Sheet: 7B
Flank	Intermediate	Midline		Statistics:
7	7	5		Parameter				Parameter				Parameter
6.5	6	3.5		Table Analyzed	E13WTRegionalHeights			Table Analyzed	E13WTRegionalHeights			Table Analyzed	E13WTRegionalHeights
6	6	4.5		Column A	Flank			Column A	Flank			Column B	Intermediate
7	5.5	5		vs	vs			vs	vs			vs	vs
7.5	5	7		Column B	Intermediate			Column C	Midline			Column C	Midline
7	6	5
5.5	6	4		Unpaired t test				Unpaired t test				Unpaired t test
6.5	7	4.5		P value	< 0.0001			P value	< 0.0001			P value	< 0.0001
7	6.5	4.5		P value summary	***			P value summary	***			P value summary	***
7	8	5		Are means signif. different? (P < 0.05)	Yes			Are means signif. different? (P < 0.05)	Yes			Are means signif. different? (P < 0.05)	Yes
5.5	5.5	5.5		One- or two-tailed P value?	Two-tailed			One- or two-tailed P value?	Two-tailed			One- or two-tailed P value?	Two-tailed
8	5	6		t, df	t=7.437 df=725			t, df	t=38.12 df=725			t, df	t=28.75 df=722
7	5	4.5
7	6	6		How big is the difference?				How big is the difference?				How big is the difference?
7.5	5.5	4.5		Mean ± SEM of column A	6.927 ± 0.04806 N=365			Mean ± SEM of column A	6.927 ± 0.04806 N=365			Mean ± SEM of column B	6.410 ± 0.05028 N=362
8	6	4.5		Mean ± SEM of column B	6.410 ± 0.05028 N=362			Mean ± SEM of column C	4.623 ± 0.03657 N=362			Mean ± SEM of column C	4.623 ± 0.03657 N=362
9.5	6.5	4		Difference between means	0.5172 ± 0.06954			Difference between means	2.304 ± 0.06046			Difference between means	1.787 ± 0.06217
7	6.5	4.5		95% confidence interval	0.3809 to 0.6535			95% confidence interval	2.186 to 2.423			95% confidence interval	1.665 to 1.909
6	7.5	5		R square	0.07089			R square	0.6671			R square	0.5337
6.5	6	5.5
7.5	6.5	5		F test to compare variances				F test to compare variances				F test to compare variances
7.5	5.5	5		F,DFn, Dfd	1.086, 361, 364			F,DFn, Dfd	1.741, 364, 361			F,DFn, Dfd	1.890, 361, 361
7	6	6		P value	0.4348			P value	< 0.0001			P value	< 0.0001
5.5	7	4		P value summary	ns			P value summary	***			P value summary	***
6.5	6.5	5		Are variances significantly different?	No			Are variances significantly different?	Yes			Are variances significantly different?	Yes
9.5	6.5	5.5
6.5	7	5.5
7	7	5
7.5	7	6.5
6	6.5	4.5
6	6.5	5
6	5.5	4
6.5	5	4
7	6	4.5
8.5	6.5	4
8	6.5	4.5
7	6	4.5
6.5	5.5	4.5
7.5	6	5.5
7.5	5.5	5
8.5	5	5.5
8	4.5	4.5
7.5	7	5
6.5	6.5	5.5
6.5	5	4.5
7	5	4.5
6.5	6.5	5
6.5	8.5	6.5
7.5	8	5
6.5	6.5	4.5
6.5	6.5	4.5
6	5.5	4.5
8.5	6.5	5
8	7	4.5
9	6	5.5
8	7.5	5.5
6	6	6
6.5	6	5.5
7.5	5.5	5.5
9	6	4.5
7.5	6.5	5
8	5	5
6	5.5	5
7.5	8	5
7.5	6	6
8	7.5	4.5
7.5	7	6
8.5	6.5	4.5
8.5	4.5	4.5
7.5	5	4.5
6.5	6	4
7	6	4.5
6	6	5.5
6	6.5	4.5
6.5	7	5
8	6.5	4.5
7.5	7.5	6
9.5	6.5	5.5
6	7	5.5
7	7.5	5
8.5	6	5.5
7	7	5
7	6	3.5
7.5	5	4.5
7	7	4.5
10	7	5
5.5	8	5.5
8	5	5
9.5	6	5
9	5.5	5
8	6	5.5
7	7	5.5
5.5	7	5
6.5	7	5.5
7.5	7.5	5
6	7	5.5
6.5	4.5	5.5
5.5	6.5	5
6	5	5
8.5	6	5.5
6.5	5	5.5
7	5	5
6	5	5.5
6	6.5	5
7	5.5	6
4.5	6.5	6.5
7	6	6
6	5	6
6	6	6
6	6.5	5.5
7.5	6.5	4.5
6.5	7	4.5
4.5	6	6
7.5	5.5	7
6	6	6.5
6.5	6	5.5
6.5	6.5	5
7	5.5	6
5.5	7	5
7	6.5	5.5
6.5	6.5	4
7.5	6.5	3.5
6	6	5
7	6.5	4
5.5	5	4
7	5.5	3.5
6	5	4
6	5.5	3.5
6	5.5	4.5
6.5	4.5	4.5
7	6	3.5
7	6	4
7.5	6.5	4
7	5.5	5.5
7	5.5	4
7	5	4
6.5	5	5.5
6	5	4.5
6.5	6	5
5.5	6.5	4.5
5.5	6.5	4.5
5.5	5.5	4.5
6	6.5	4.5
7	5.5	4
6	7.5	4.5
7.5	7	5
7	6.5	5
6.5	5.5	5
6.5	6	4.5
6.5	5	6.5
7	6.5	4
5	7	4
7	7.5	4
5.5	6.5	4
6	8	5
7.5	7.5	4
6.5	6.5	4.5
7.5	6	4.5
5.5	6	4.5
6	6	4
6.5	6	4
6.5	6	4.5
7.5	5.5	4.5
5.5	5.5	4
6	5	4.5
5.5	6.5	5.5
5.5	6	4.5
5.5	5	5.5
7.5	5.5	4
7	6	4
6.5	5.5	4
6	5.5	4
5.5	5.5	4
5	5.5	4.5
6.5	5	4.5
7	6	4
5.5	6	4.5
8	5.5	4.5
6.5	6.5	5
5.5	6.5	5
5.5	5.5	4
7.5	6.5	4
7.5	7	4
6.5	6.5	3.5
6.5	5.5	5
6.5	6	5
6	6.5	5
6	4.5	4.5
6.5	6	5
7	5.5	4.5
6.5	6	4.5
5.5	6.5	4.5
6	5.5	4.5
6	5.5	4.5
6.5	6.5	4.5
6.5	5.5	4.5
6	6	4
6	6.5	3.5
8	6	4.5
6.5	6	5
5.5	7.5	5
7	6	4.5
7	6	3
7	6.5	4.5
6.5	7	4
6.5	7	4
7.5	6	3.5
6	7	4.5
6	5.5	5.5
6	6	5.5
7	5.5	6
8	6.5	5
7	6	4.5
6.5	5	5.5
6.5	5.5	4.5
6.5	6.5	4.5
7.5	5	4.5
7.5	4.5	4
7	5	4.5
7	5.5	5
6.5	7	4.5
5.5	6.5	5
6.5	5.5	4.5
6.5	5.5	4.5
6.5	6.5	5
7	5	4
8.5	6	4
7.5	6	4
7	6.5	4.5
7	5.5	4
6	5	4.5
6.5	5	3.5
7	5.5	4.5
6.5	5	4.5
6.5	5.5	5
6	5	4.5
5	4.5	4.5
6	6	4
6.5	5	4
6.5	4.5	4.5
8.5	6.5	4
7.5	6	3.5
7	6.5	4
8	6.5	4
6.5	9	4
6.5	7	4
7.5	7.5	3.5
8	5.5	3
7.5	7	3
6.5	7.5	3.5
6.5	6.5	4
7.5	6.5	4
6	6	4
5.5	7	4
6.5	7	4
8	7.5	4.5
7.5	8	4
6.5	6.5	3
7	7	4.5
7	8.5	4
7	8	4
7.5	8.5	4
6.5	8.5	3.5
7	8	3.5
7.5	8	3.5
7	8	4
8.5	7.5	4
7.5	9	4
7.5	6.5	4.5
7	7.5	4
6.5	7	4
7.5	8	4.5
6	6.5	4
6.5	7.5	4
7.5	8	4
6.5	8.5	4
7	8	4.5
7.5	8	4
8	7	4
9	7	4
10	8.5	4
7.5	7	4
8.5	7.5	4.5
7	8	4.5
7	8	4
6.5	8.5	4
7.5	7.5	4
7	7.5	3.5
7	6	4.5
7	6.5	5.5
8.5	8	4.5
6	8	5
6.5	6.5	5
6	6.5	5
7.5	7.5	4.5
8	7.5	4.5
6.5	7.5	4.5
7.5	8.5	4
6	8	5.5
7.5	7.5	5
9.5	7.5	5.5
7.5	8.5	4.5
6.5	5.5	4
7.5	5	4.5
6	6	4.5
6.5	7	4.5
7	7.5	4
7	8.5	3.5
7.5	7.5	4
6.5	7	4
7	6	4.5
6	7	5
7.5	7.5	4
8	6	4
8	6.5	4
8	5	4.5
7.5	8	4.5
6.5	7.5	5
6.5	7	3
7	6.5	3.5
9	6	4.5
8	7	5
8	7	4.5
6	6	4.5
6.5	7	5
7.5	7	5
7.5	6	4
6.5	6.5	5
8	7	5
7	7	3.5
7	6.5	4.5
8	6.5	3.5
7	7	5.5
7.5	7	4.5
7.5	7.5	4.5
6	5.5	4
7.5	6.5	6
7	7.5	5
8.5	7	4.5
7.5	6	6
7.5	6.5	5
7.5	7.5	4.5
6.5	7	4.5
6.5	6.5	5
7	6.5	4.5
6.5	6	5
8	7	4.5
7	6.5	5.5
7.5	8	4.5
6.5	7.5	5
7.5	7	5
7.5	7.5	4.5
6.5	7.5	5
6.5	7	5.5
6	8.5	4.5
7	7	4.5
7	5	5
7.5	6	5
7.5	6.5	4
8	7	4.5
7.5	7	4.5
8.5	7.5	4.5
10
7.5
7

## Sheet: 7C
Flank	Intermediate	Midline
167.29	147.67	341.78
140.26	143.14	265.92
145.27	172	414.15
160.94	186.71	363.37
167.84	188.93	462.75
165.95	150.92	332.88
Statistics:
Parameter				Parameter				Parameter
Table Analyzed	E13WTFloodAreas			Table Analyzed	E13WTFloodAreas			Table Analyzed	E13WTFloodAreas
Column A	Flank			Column A	Flank			Column B	Intermediate
vs	vs			vs	vs			vs	vs
Column B	Intermediate			Column C	Midline			Column C	Midline
Unpaired t test				Unpaired t test				Unpaired t test
P value	0.4872			P value	< 0.0001			P value	< 0.0001
P value summary	ns			P value summary	***			P value summary	***
Are means signif. different? (P < 0.05)	No			Are means signif. different? (P < 0.05)	Yes			Are means signif. different? (P < 0.05)	Yes
One- or two-tailed P value?	Two-tailed			One- or two-tailed P value?	Two-tailed			One- or two-tailed P value?	Two-tailed
t, df	t=0.7213 df=10			t, df	t=7.255 df=10			t, df	t=6.822 df=10
How big is the difference?				How big is the difference?				How big is the difference?
Mean ± SEM of column A	157.9 ± 4.939 N=6			Mean ± SEM of column A	157.9 ± 4.939 N=6			Mean ± SEM of column B	164.9 ± 8.305 N=6
Mean ± SEM of column B	164.9 ± 8.305 N=6			Mean ± SEM of column C	363.5 ± 27.90 N=6			Mean ± SEM of column C	363.5 ± 27.90 N=6
Difference between means	-6.970 ± 9.663			Difference between means	-205.6 ± 28.33			Difference between means	-198.6 ± 29.11
95% confidence interval	-28.50 to 14.56			95% confidence interval	-268.7 to -142.4			95% confidence interval	-263.4 to -133.7
R square	0.04946			R square	0.8404			R square	0.8232
F test to compare variances				F test to compare variances				F test to compare variances
F,DFn, Dfd	2.828, 5, 5			F,DFn, Dfd	31.91, 5, 5			F,DFn, Dfd	11.28, 5, 5
P value	0.2785			P value	0.0017			P value	0.0188
P value summary	ns			P value summary	**			P value summary	*
Are variances significantly different?	No			Are variances significantly different?	Yes			Are variances significantly different?	Yes

## Sheet: 7D
Flank	Intermediate	Midline
185	221	77
232	222	77
214	192	45
199	176	46
187	173	68
192	212	86
Statistics:
Parameter				Parameter				Parameter
Table Analyzed	E13WTCellDensity			Table Analyzed	E13WTCellDensity			Table Analyzed	E13WTCellDensity
Column A	Flank			Column A	Flank			Column B	Intermediate
vs	vs			vs	vs			vs	vs
Column B	Intermediate			Column C	Midline			Column C	Midline
Unpaired t test				Unpaired t test				Unpaired t test
P value	0.8567			P value	< 0.0001			P value	< 0.0001
P value summary	ns			P value summary	***			P value summary	***
Are means signif. different? (P < 0.05)	No			Are means signif. different? (P < 0.05)	Yes			Are means signif. different? (P < 0.05)	Yes
One- or two-tailed P value?	Two-tailed			One- or two-tailed P value?	Two-tailed			One- or two-tailed P value?	Two-tailed
t, df	t=0.1853 df=10			t, df	t=13.17 df=10			t, df	t=11.62 df=10
How big is the difference?				How big is the difference?				How big is the difference?
Mean ± SEM of column A	201.5 ± 7.451 N=6			Mean ± SEM of column A	201.5 ± 7.451 N=6			Mean ± SEM of column B	199.3 ± 9.010 N=6
Mean ± SEM of column B	199.3 ± 9.010 N=6			Mean ± SEM of column C	66.50 ± 7.037 N=6			Mean ± SEM of column C	66.50 ± 7.037 N=6
Difference between means	2.167 ± 11.69			Difference between means	135.0 ± 10.25			Difference between means	132.8 ± 11.43
95% confidence interval	-23.88 to 28.22			95% confidence interval	112.2 to 157.8			95% confidence interval	107.4 to 158.3
R square	0.003423			R square	0.9455			R square	0.931
F test to compare variances				F test to compare variances				F test to compare variances
F,DFn, Dfd	1.462, 5, 5			F,DFn, Dfd	1.121, 5, 5			F,DFn, Dfd	1.639, 5, 5
P value	0.6869			P value	0.9032			P value	0.6007
P value summary	ns			P value summary	ns			P value summary	ns
Are variances significantly different?	No			Are variances significantly different?	No			Are variances significantly different?	No

## Sheet: 7E
Flank	Intermediate	Midline
20.9	27.3	26.1
23.8	30	24.7
21.4	26	24.9
24	25	23.5
25.3	25.6	23.4
26.1	29.1	26.7
Statistics:
Parameter				Parameter				Parameter
Table Analyzed	E13WTElongation			Table Analyzed	E13WTElongation			Table Analyzed	E13WTElongation
Column A	Flank			Column A	Flank			Column B	Intermediate
vs	vs			vs	vs			vs	vs
Column B	Intermediate			Column C	Midline			Column C	Midline
Unpaired t test				Unpaired t test				Unpaired t test
P value	0.0125			P value	0.2256			P value	0.0432
P value summary	*			P value summary	ns			P value summary	*
Are means signif. different? (P < 0.05)	Yes			Are means signif. different? (P < 0.05)	No			Are means signif. different? (P < 0.05)	Yes
One- or two-tailed P value?	Two-tailed			One- or two-tailed P value?	Two-tailed			One- or two-tailed P value?	Two-tailed
t, df	t=3.037 df=10			t, df	t=1.291 df=10			t, df	t=2.314 df=10
How big is the difference?				How big is the difference?				How big is the difference?
Mean ± SEM of column A	23.58 ± 0.8459 N=6			Mean ± SEM of column A	23.58 ± 0.8459 N=6			Mean ± SEM of column B	27.17 ± 0.8225 N=6
Mean ± SEM of column B	27.17 ± 0.8225 N=6			Mean ± SEM of column C	24.88 ± 0.5455 N=6			Mean ± SEM of column C	24.88 ± 0.5455 N=6
Difference between means	-3.583 ± 1.180			Difference between means	-1.300 ± 1.007			Difference between means	2.283 ± 0.9869
95% confidence interval	-6.212 to -0.9546			95% confidence interval	-3.543 to 0.9427			95% confidence interval	0.08442 to 4.482
R square	0.4798			R square	0.143			R square	0.3486
F test to compare variances				F test to compare variances				F test to compare variances
F,DFn, Dfd	1.058, 5, 5			F,DFn, Dfd	2.405, 5, 5			F,DFn, Dfd	2.273, 5, 5
P value	0.9523			P value	0.3577			P value	0.3885
P value summary	ns			P value summary	ns			P value summary	ns
Are variances significantly different?	No			Are variances significantly different?	No			Are variances significantly different?	No

## Sheet: 7L
	Flank			Transition			Midline
planar	63.89	80	66.67	72.73	88	76.47	99.91	100	100
ob + perp	36.11	20	33.33	27.27	12	23.53	9.09	0	0
