# Supplementary material for: Epithelial geometry regulates spindle orientation and progenitor fate during formation of the mammalian epidermis
Source: eLife journal article supplement (doi:10.7554/elife.47102), 2019-06-12
Supplement: supp [file Fig7Supp1_FromPrism.xlsx]

## Sheet: 7A
Flank	Intermediate			Statistics:
9.5	7.5			Parameter
8	7.5			Table Analyzed	E13LpRegionalHeights
7.5	6.5			Column A	Flank
7	7.5			vs	vs
8.5	6.5			Column B	Intermediate
7.5	7
7	7.5			Unpaired t test
8.5	7			P value	0.7696
6.5	7			P value summary	ns
8	7.5			Are means signif. different? (P < 0.05)	No
7.5	8.5			One- or two-tailed P value?	Two-tailed
8.5	6			t, df	t=0.2931 df=478
6.5	7
8.5	7.5			How big is the difference?
7	8.5			Mean ± SEM of column A	7.577 ± 0.06316 N=240
8	7.5			Mean ± SEM of column B	7.552 ± 0.05734 N=240
8.5	6.5			Difference between means	0.02500 ± 0.08531
7.5	7			95% confidence interval	-0.1422 to 0.1922
7.5	9.5			R square	0.0001796
8.5	8
8	7.5			F test to compare variances
8.5	7.5			F,DFn, Dfd	1.213, 239, 239
8.5	7			P value	0.1358
8	7.5			P value summary	ns
6	7			Are variances significantly different?	No
9	6.5
7	8
7.5	7.5
8.5	7
7.5	7
6	6.5
7	5.5
6.5	5.5
7	6
7	6.5
8	7.5
7	7
9.5	7.5
9.5	7.5
9	7
8	7
7.5	7.5
7.5	7.5
7.5	6.5
6	6
6.5	8.5
7	6
6.5	6
7.5	6
7.5	5.5
6	7.5
5.5	7
5.5	7.5
7.5	6.5
8	8
8	8
6.5	8
6.5	6
6.5	6.5
8.5	6.5
7	7
6.5	7
7.5	7
8.5	7.5
7.5	8.5
8	8.5
8	7.5
7.5	9.5
8	8.5
9	7.5
8	7
6	8.5
8	8.5
8	8.5
8	9
8	7
7.5	10
6	8.5
8	7.5
8	8
8	11
7.5	8
7.5	8
6.5	8.5
8	8.5
7	9
7	9
7.5	9
7.5	7.5
7.5	7.5
7.5	7
8.5	8
7.5	8
7.5	11
7.5	10
7.5	7.5
8.5	8
6.5	9
6.5	7.5
6	7.5
6.5	9
7.5	8
7.5	7.5
7.5	7
6.5	8
8	7
5.5	8.5
8	8
8	6.5
8	7.5
8	7.5
7.5	8
7	9
9	9
7.5	7.5
8	7.5
8.5	8
7	6.5
6.5	8
7.5	7.5
8.5	7
7.5	6.5
8.5	6
8	7
6.5	9
8	8.5
7.5	7
7.5	7
8.5	7.5
8	7.5
7	6
8.5	8
9	7
10	7.5
9	7
9	8
9	7.5
9	7.5
8.5	6.5
9.5	8
8.5	7.5
8	8.5
8	7
9	7.5
8.5	9
9	8.5
9.5	8.5
9.5	7.5
9	7
8	7.5
9.5	8
8	7
8.5	9
7.5	8
8	8.5
8.5	8
7	9.5
8	8
7.5	7
8	7.5
9	7.5
7.5	7.5
8.5	7.5
7.5	7.5
5.5	8.5
6.5	7.5
7.5	8.5
7.5	7.5
11	7
8.5	6
7	6.5
8	7.5
8	8
8.5	7.5
7.5	6.5
8	7.5
9	7.5
8	7.5
8	8
8.5	7.5
6.5	8.5
6	7
6.5	6.5
7.5	6
7	6.5
6	6.5
8.5	8
7	6
6.5	6.5
6.5	7.5
4	7
7	8
6	7
6	6.5
7.5	7.5
6.5	7.5
8	7
7	7
7.5	7
7.5	8
7	8.5
7.5	8
9	8
7	7
7	8
6.5	8.5
5.5	7
6.5	7
9	7
8.5	7.5
7	7.5
6.5	8.5
6	8
6.5	8
6.5	9
7.5	7.5
6	8
7.5	8.5
6.5	7.5
6.5	7
7	7.5
7	7.5
9	8
6.5	8.5
7	7.5
9	8
7	7.5
8.5	7.5
8	7.5
7.5	7.5
8	8
6.5	7
7	6.5
7	7.5
7.5	7
7	9
7	8.5
8	7
6.5	6.5
7.5	6.5

## Sheet: 7B
Lateral	Intermediate
118.96	148.51
130.01	130.11
106.38	116.32
131.47	135
136.32	125.78
133.27	137.07
Statistics:
Parameter
Table Analyzed	E13LpFloodAreas
Column A	Lateral
vs	vs
Column B	Intermediate
Unpaired t test
P value	0.367
P value summary	ns
Are means signif. different? (P < 0.05)	No
One- or two-tailed P value?	Two-tailed
t, df	t=0.9450 df=10
How big is the difference?
Mean ± SEM of column A	126.1 ± 4.618 N=6
Mean ± SEM of column B	132.1 ± 4.455 N=6
Difference between means	-6.063 ± 6.416
95% confidence interval	-20.36 to 8.233
R square	0.08198
F test to compare variances
F,DFn, Dfd	1.075, 5, 5
P value	0.9388
P value summary	ns
Are variances significantly different?	No

## Sheet: 7C
Lateral	Intermediate
171	141
160	158
194	176
156	153
148	163
156	142
Statistics:
Parameter
Table Analyzed	E13LpCellDensity
Column A	Lateral
vs	vs
Column B	Intermediate
Unpaired t test
P value	0.3385
P value summary	ns
Are means signif. different? (P < 0.05)	No
One- or two-tailed P value?	Two-tailed
t, df	t=1.005 df=10
How big is the difference?
Mean ± SEM of column A	164.2 ± 6.705 N=6
Mean ± SEM of column B	155.5 ± 5.421 N=6
Difference between means	8.667 ± 8.622
95% confidence interval	-10.54 to 27.88
R square	0.09176
F test to compare variances
F,DFn, Dfd	1.530, 5, 5
P value	0.652
P value summary	ns
Are variances significantly different?	No

## Sheet: 7D
Lateral	Intermediate
26.03	24.04
24.92	24.57
22.72	23.65
21.67	26.44
23.07	23.34
20.78	23.59
Statistics:
Parameter
Table Analyzed	E13LpElongation
Column A	Lateral
vs	vs
Column B	Intermediate
Unpaired t test
P value	0.2755
P value summary	ns
Are means signif. different? (P < 0.05)	No
One- or two-tailed P value?	Two-tailed
t, df	t=1.153 df=10
How big is the difference?
Mean ± SEM of column A	23.20 ± 0.8044 N=6
Mean ± SEM of column B	24.27 ± 0.4677 N=6
Difference between means	-1.073 ± 0.9305
95% confidence interval	-3.147 to 0.9998
R square	0.1174
F test to compare variances
F,DFn, Dfd	2.958, 5, 5
P value	0.2591
P value summary	ns
Are variances significantly different?	No

## Sheet: 7I
	Flank		Transition
planar	40.48	62.22	64.15	51.72
ob + perp	59.52	37.78	35.85	48.28
