# Supplementary material for: Epithelial geometry regulates spindle orientation and progenitor fate during formation of the mammalian epidermis
Source: eLife journal article supplement (doi:10.7554/elife.47102), 2019-06-12
Supplement: supp [file Fig8_FromPrism.xlsx]

## Sheet: 8B
Control	Stretched
19.24	29.15
19.82	34.9
20.01	31.16
18.95	27.85
20.97	30.06
21.13	26.13
21.46	33.81
19.99	31.83
21.1	32.22
Statistics:
Parameter
Table Analyzed	E14Elongation
Column A	Control
vs	vs
Column B	Stretched
Unpaired t test
P value	< 0.0001
P value summary	***
Are means signif. different? (P < 0.05)	Yes
One- or two-tailed P value?	Two-tailed
t, df	t=10.69 df=16
How big is the difference?
Mean ± SEM of column A	20.30 ± 0.3000 N=9
Mean ± SEM of column B	30.79 ± 0.9344 N=9
Difference between means	-10.49 ± 0.9813
95% confidence interval	-12.57 to -8.413
R square	0.8772
F test to compare variances
F,DFn, Dfd	9.700, 8, 8
P value	0.0042
P value summary	**
Are variances significantly different?	Yes

## Sheet: 8C
Control	Stretched			Statistics:
8.5	9			Parameter
8.5	8.5			Table Analyzed	E14CellHeights
10	9			Column A	Control
10	7.5			vs	vs
9	7.5			Column B	Stretched
9	6.5
9.5	7.5			Unpaired t test
10.5	8			P value	< 0.0001
10.5	8.5			P value summary	***
10	7.5			Are means signif. different? (P < 0.05)	Yes
9.5	8			One- or two-tailed P value?	Two-tailed
8.5	9			t, df	t=12.49 df=899
9.5	8.5
8	8.5			How big is the difference?
9	8			Mean ± SEM of column A	9.398 ± 0.05924 N=451
9	9.5			Mean ± SEM of column B	8.490 ± 0.04208 N=450
10	9.5			Difference between means	0.9080 ± 0.07269
10	9			95% confidence interval	0.7655 to 1.050
10.5	7.5			R square	0.1479
10	8.5
10	8			F test to compare variances
10	6			F,DFn, Dfd	1.987, 450, 449
10.5	7			P value	< 0.0001
10	8.5			P value summary	***
9	7			Are variances significantly different?	Yes
9.5	7
10	8
8.5	8.5
9	8.5
8	7.5
10	9
8.5	7.5
8.5	8.5
11	8.5
8	7.5
8	8
8	8
7.5	8.5
9	7.5
10.5	7.5
8	8.5
8	7.5
9	7
8.5	7.5
10	7.5
7.5	7.5
10.5	7.5
8	7.5
8.5	8
9	9.5
10.5	8
10.5	9
8	9
11	9
9.5	8
10.5	9.5
9.5	8
11	8
10.5	8
10	6.5
10	8
9	9
8	8
8.5	9
9	9.5
10.5	8.5
10.5	8
10.5	9
7.5	8.5
9	8.5
8	7.5
9.5	8
11	8
9.5	8
10	8
8.5	6.5
9.5	8
9.5	8
8.5	9
9.5	7.5
8.5	8
10	8.5
9.5	7.5
11	8.5
7.5	8
11.5	8.5
12	9
12	7.5
12	9
10.5	8.5
11	8.5
12	8
10.5	9
13	8.5
12	8
11	7.5
11.5	8
11.5	8
11.5	8.5
10.5	8.5
10	8.5
9.5	7.5
9	9.5
8.5	8
8	8
7.5	8.5
10.5	7
9.5	9
9.5	9
10	8.5
10.5	10.5
10.5	10
12.5	10
10	10.5
10.5	10.5
11.5	9
10.5	8.5
9.5	8.5
9	8
10	8
9.5	8
11	9.5
11.5	8
9.5	9
12	9.5
10	6
11	8
10.5	8.5
9.5	10
10.5	10
9.5	9.5
10.5	8.5
11	9
10	8.5
10	7.5
10	8.5
10	8.5
10.5	7.5
11	7
9.5	8
9.5	7.5
9.5	8
10.5	8
11.5	9
10	10
8.5	8.5
11	10
9.5	9.5
10.5	9.5
10.5	9
10	8
7.5	8
7.5	8.5
10	9.5
7	10
7	8.5
8	6.5
7.5	8
7.5	11
8	8.5
8	7.5
8.5	9
8.5	7.5
7.5	8.5
8	9
8.5	8.5
9	8.5
9	8.5
8	8
8	8.5
7.5	6.5
8	8.5
8.5	9.5
8	8
8.5	8.5
7	8
7.5	9
7.5	9.5
7.5	9
9	9.5
11.5	7
9.5	7.5
9	8.5
6	8.5
8	9
9	9.5
8	9.5
7.5	8.5
8.5	10
8	10
8	7.5
7.5	8
9.5	9.5
10	9.5
9	8.5
8	9
8	10.5
7	11
9.5	8
10.5	9.5
9.5	9.5
7.5	9.5
7	8.5
7.5	7
8	10.5
8.5	10
8.5	10
7.5	9
9	10.5
8.5	10
9.5	10
9	10
7	9.5
7.5	10.5
8	8
8	8.5
8.5	9
8.5	9.5
8.5	8.5
9.5	9.5
8.5	8.5
8	8.5
7	9.5
7	10.5
7.5	12
8.5	9
8.5	8.5
9.5	8.5
10	8
7	8.5
9.5	7.5
8.5	9
8	9
7	9.5
10	6
9	7.5
11.5	8
9	8
7	8.5
8	9
9.5	8
9	8
10	8
10.5	8
9.5	8
10	9.5
10.5	9.5
7.5	9
8	8
8	9
9.5	10
9.5	9
10	8.5
7	8
9	8.5
8	8
9	8.5
8	9
8.5	9.5
9	9.5
9	9.5
8	8.5
8	9
9	9
8.5	8
9.5	9
8	8
9.5	7.5
8	9.5
7	9
8.5	8.5
8	8
8.5	9.5
8	8.5
8	8
8.5	8.5
9	8
8.5	8.5
9	8.5
10	7.5
10.5	7
9.5	8
10	8.5
8	9.5
9	7.5
8.5	7.5
8.5	7.5
9.5	8
8.5	8.5
9	9
8.5	8.5
9	9.5
8.5	8.5
7	9.5
7.5	8.5
9	8
9	7
9	7
8.5	7.5
9.5	9
8.5	10
8.5	9
10	9
10	7.5
9	8
8.5	7.5
8.5	7.5
8	8.5
8	9
10	7.5
10.5	9
8	8.5
10	10
9	9.5
9.5	8
9	8.5
8	7.5
8	8.5
7	9
7	8.5
8.5	8.5
8.5	10
8	9.5
8	10
8	8.5
8	9
7	8.5
9	8
9	8.5
9.5	8.5
8.5	9.5
10	9
9	9.5
8	10
9	8.5
9	7.5
9.5	9
9.5	9.5
8.5	8
8.5	8.5
10	8.5
10	9.5
8.5	9
8.5	9.5
8.5	10
9	9.5
10	7.5
10	8.5
9.5	7.5
10	7
9	8.5
10.5	9
10	10
11	8
11	7
10.5	8
10.5	8.5
10.5	9.5
10.5	9
10.5	9
8.5	8.5
11	8.5
11	7.5
11.5	7.5
10.5	9
10.5	9
10	8.5
10	8.5
8.5	9
10.5	9.5
10.5	8
11.5	8
9	8.5
9	7.5
11	8
9.5	8
11	8
11.5	7
10	6.5
10.5	8.5
10.5	7.5
12	10
9.5	6.5
11.5	8.5
10	7.5
11	8.5
11.5	7.5
11	8.5
8.5	8.5
9.5	9.5
10.5	9
11.5	9
10.5	9.5
11	8.5
11	9
10.5	10.5
10.5	8
10	9.5
9	9.5
10.5	9
10	7.5
10.5	9.5
10	8.5
9.5	7
9	8.5
10	9
10	8
9.5	9
10	8.5
10	7
11	9
9	8.5
9	8
10	7.5
10.5	9
10.5	8
11	7.5
8.5	9.5
11	7.5
9.5	8.5
12	8
11	8
11	7.5
11	8.5
11	9
11	8
11.5	8.5
9	8.5
11.5	7.5
11.5	6.5
10	8.5
11.5	8
10.5	8
10.5	9.5
12	8.5
10.5	8
11	8
10.5	9.5
11.5	8.5
10.5	8
11.5	8.5
10	7
10.5	7.5
11.5	8
10	7.5
10	8.5
10.5	8
10.5	9
10.5	8.5
9	7
9.5
