# Supplementary material for: Epithelial geometry regulates spindle orientation and progenitor fate during formation of the mammalian epidermis
Source: eLife journal article supplement (doi:10.7554/elife.47102), 2019-06-12
Supplement: supp [file Fig8Supp1_FromPrism.xlsx]

## Sheet: 8S1B
Control	Stretched
21.7	31.5
20.7	28.3
20.9	23.57
19.26	26.73
19.47	28.14
19.76	31.61
Statistics:
Parameter
Table Analyzed	E15Elongation
Column A	Control
vs	vs
Column B	Stretched
Unpaired t test
P value	0.0001
P value summary	***
Are means signif. different? (P < 0.05)	Yes
One- or two-tailed P value?	Two-tailed
t, df	t=6.168 df=10
How big is the difference?
Mean ± SEM of column A	20.30 ± 0.3891 N=6
Mean ± SEM of column B	28.31 ± 1.239 N=6
Difference between means	-8.010 ± 1.299
95% confidence interval	-10.90 to -5.116
R square	0.7918
F test to compare variances
F,DFn, Dfd	10.14, 5, 5
P value	0.0238
P value summary	*
Are variances significantly different?	Yes

## Sheet: 8S1C
Control	Stretched			Statistics:
8	8.5			Parameter
9	7.5			Table Analyzed	E15CellHeights
9.5	9			Column A	Control
10	8.5			vs	vs
8.5	8			Column B	Stretched
10	8
8.5	8			Unpaired t test
8.5	10			P value	< 0.0001
7.5	9.5			P value summary	***
8.5	11			Are means signif. different? (P < 0.05)	Yes
9	9			One- or two-tailed P value?	Two-tailed
9	8			t, df	t=17.57 df=598
9	7.5
7	8			How big is the difference?
9.5	8			Mean ± SEM of column A	9.048 ± 0.05064 N=300
9.5	7.5			Mean ± SEM of column B	7.780 ± 0.05145 N=300
10.5	7			Difference between means	1.268 ± 0.07220
9	7			95% confidence interval	1.127 to 1.410
8	7.5			R square	0.3404
8	7.5
8	8			F test to compare variances
7	8			F,DFn, Dfd	1.032, 299, 299
8	8.5			P value	0.7836
7	10			P value summary	ns
6.5	9.5			Are variances significantly different?	No
9	8.5
8.5	8
8.5	7.5
8.5	7.5
6.5	7.5
7.5	7.5
7.5	7.5
8.5	7
8	6.5
10	7.5
9	8
10.5	7.5
9	6
8	8
10	7
9.5	6.5
8	7.5
10.5	7.5
9.5	7
9	7.5
8	8
8.5	7
9.5	8.5
8.5	8
10	7.5
9.5	8
8.5	7.5
9	8.5
10	6.5
9.5	7.5
8.5	8.5
9.5	7
9.5	8.5
7.5	8.5
9.5	7
9	6.5
8.5	6.5
8.5	6.5
8	7
8.5	8
8	6.5
10	7
8.5	6.5
9.5	7
8.5	7.5
10	6.5
9	7
8.5	6.5
7	8
8.5	7.5
9	9
9	6.5
9.5	9
10.5	8
8.5	8
8	7
7.5	8.5
8.5	8
8.5	8
8	7.5
8.5	7
9.5	8
10	9
10.5	9.5
10	9
9.5	8.5
10	8
9.5	7.5
9.5	9.5
7.5	8
9	9.5
8.5	7.5
8.5	9
9.5	11
9	9
10	9
8.5	10.5
8.5	9.5
8.5	8
9	8
8.5	8.5
7	7.5
9	7.5
9	7.5
7.5	7.5
7.5	8
8.5	9
8	9.5
9	9.5
10	9.5
10	10
9.5	7.5
8	7
8	7.5
9	8.5
9.5	8.5
8.5	7
7	7.5
8.5	9
9	8
7.5	10
8.5	9
10	8.5
9.5	8
7	7.5
9.5	7.5
9.5	7
9	7.5
10.5	7.5
9	7.5
10.5	7.5
11	7.5
10	9
8	8
8	7.5
11	8
8	8
8.5	9
10	7.5
9.5	8
8	8
9	7
8	8
9.5	8.5
9.5	9.5
10	6.5
9.5	7.5
9.5	8.5
9	7.5
10	8
8	9
9	8
8.5	7.5
9.5	8
9	9
8.5	7.5
9.5	8
8.5	7.5
9.5	7.5
10	8
9.5	7.5
8	9
9	8
10	7.5
10	8
9	6
8.5	7.5
8.5	8.5
8.5	5.5
9	8.5
9.5	7.5
9.5	7
10	8
9.5	7
10	7.5
9	8
8.5	8
9.5	7.5
8.5	7
9	7
10	6.5
10.5	7
10	7.5
9.5	8
9	7.5
9.5	7.5
9	7
9.5	7
8.5	6.5
8.5	7.5
9	7.5
9	7
9	7.5
9.5	7
10	8
8.5	7.5
9	6.5
9	7
9.5	7.5
10	7.5
9.5	7.5
8.5	7
9.5	7.5
8.5	8
9	7.5
9	8
10	7.5
9	7.5
9.5	7.5
9	7.5
9	7
8.5	7
8	8
9.5	6.5
9	7.5
10.5	8
9.5	7
8.5	7.5
7.5	7.5
9	6.5
8	8
9	7.5
8.5	8.5
8.5	7.5
9.5	8
7.5	7
9.5	8.5
10	8
8.5	7
9	8.5
9	8.5
9.5	7
10	8
9.5	6.5
9.5	7.5
10	8
9	6.5
10	7
9	7.5
9.5	6.5
10	7.5
9.5	7
8.5	7
9.5	9
10.5	7.5
10	7.5
9	6.5
10	6.5
9	7
8.5	5
9	8
10.5	8.5
8.5	8
9	6
9	8
8	7
8	7.5
9	7.5
8	7
8.5	7
10	7
8.5	7.5
9	8
9.5	7.5
8.5	7.5
9	7
10.5	8
8.5	7.5
9.5	8.5
9	8.5
9.5	7.5
8.5	8.5
11	8
9.5	8
8.5	7
10.5	6.5
9	7.5
10	8
12	8.5
9.5	6.5
9.5	9.5
8.5	7.5
10.5	7
10	8.5
10	10
8.5	7.5
10	7
10.5	7.5
11	9
10	9
10.5	8.5
8.5	9
10.5	10
10	7.5
9.5	8
