# Supplementary material for: Epithelial geometry regulates spindle orientation and progenitor fate during formation of the mammalian epidermis
Source: eLife journal article supplement (doi:10.7554/elife.47102), 2019-06-12
Supplement: supp [file FixedDivisionAngles.xlsx]

## Sheet: E13FixedAngles
Item	Source	Length xyz	Length xy	Height	ND.T	ND.Z	ND.M	Comment		sin theta	angle_radians	angle_degrees
1	e13WT1_dapi_khg_mtmg_flank_001.nd2	10.07	10.02	1	0	0	0			0.0993049	0.0994688	5.69914
2	e13WT1_dapi_khg_mtmg_flank_001.nd2	10.88	9.39	5.5	0	0	0			0.505515	0.529978	30.3655
3	e13WT1_dapi_khg_mtmg_flank_001.nd2	11.35	10.95	3	0	0	0			0.264317	0.267496	15.3264
4	e13WT1_dapi_khg_mtmg_flank_002.nd2	11.77	11.39	3	0	0	0			0.254885	0.257729	14.7668
5	e13WT1_dapi_khg_mtmg_flank_002.nd2	14.71	14.16	4	0	0	0			0.271924	0.275392	15.7788
6	e13WT1_dapi_khg_mtmg_flank_002.nd2	13.91	13.33	4	0	0	0			0.287563	0.291681	16.7121
7	e13WT1_dapi_khg_mtmg_flank_003.nd2	8.72	6.77	5.5	0	0	0			0.630734	0.682499	39.1043
8	e13WT1_dapi_khg_mtmg_flank_003.nd2	9.85	8.76	4.5	0	0	0			0.456853	0.474454	27.1842
9	e13WT1_dapi_khg_mtmg_flank_004.nd2	8.55	8.53	0.5	0	0	0			0.0584795	0.0585129	3.35254
10	e13WT1_dapi_khg_mtmg_flank_004.nd2	9.57	8.45	4.5	0	0	0			0.470219	0.489539	28.0485
11	e13WT1_dapi_khg_mtmg_flank_004.nd2	11.61	11.57	1	0	0	0			0.0861326	0.0862395	4.94116
12	e13WT1_dapi_khg_mtmg_flank_004.nd2	6.48	3.43	5.5	0	0	0			0.848765	1.01365	58.0776
13	e13WT1_dapi_khg_mtmg_flank_005.nd2	7.27	7.26	0.5	0	0	0			0.0687758	0.0688301	3.94368
14	e13WT1_dapi_khg_mtmg_flank_005.nd2	10.29	10.24	1	0	0	0			0.0971817	0.0973354	5.5769
15	e13WT1_dapi_khg_mtmg_flank_005.nd2	13.23	13.23	0	0	0	0			0	0	0
16	e13WT1_dapi_khg_mtmg_flank_005.nd2	8.28	5.71	6	0	0	0			0.724638	0.810508	46.4387
17	e13WT1_dapi_khg_mtmg_flank_005.nd2	11.73	11.63	1.5	0	0	0			0.127877	0.128228	7.34694
18	e13WT1_dapi_khg_mtmg_flank_006.nd2	14.01	13.93	1.5	0	0	0			0.107066	0.107272	6.14623
19	e13WT1_dapi_khg_mtmg_flank_006.nd2	7.62	5.27	5.5	0	0	0			0.721785	0.806378	46.202
20	e13WT1_dapi_khg_mtmg_flank_006.nd2	5.79	1.82	5.5	0	0	0			0.949914	1.25296	71.7893
21	e13WT1_dapi_khg_mtmg_flank_006.nd2	12	12	0	0	0	0			0	0	0
22	e13WT1_dapi_khg_mtmg_flank_007.nd2	14.63	14.55	1.5	0	0	0			0.102529	0.10271	5.88482
23	e13WT1_dapi_khg_mtmg_flank_007.nd2	14.14	14.13	0.5	0	0	0			0.0353607	0.0353681	2.02644
24	e13WT1_dapi_khg_mtmg_flank_007.nd2	8.78	7.22	5	0	0	0			0.569476	0.605868	34.7137
25	e13WT1_dapi_khg_mtmg_flank_008.nd2	14.17	14.16	0.5	0	0	0			0.0352858	0.0352931	2.02215
26	e13WT1_dapi_khg_mtmg_flank_008.nd2	6.64	4.38	5	0	0	0			0.753012	0.852628	48.852
27	e13WT1_dapi_khg_mtmg_flank_008.nd2	8.81	8.45	2.5	0	0	0			0.283768	0.287722	16.4852
28	e13WT1_dapi_khg_mtmg_flank_008.nd2	6.65	3.74	5.5	0	0	0			0.827068	0.973871	55.7987
29	e13WT1_dapi_khg_mtmg_flank_009.nd2	14.69	14.68	0.5	0	0	0			0.0340368	0.0340433	1.95054
30	e13WT1_dapi_khg_mtmg_flank_009.nd2	12.75	12.75	0	0	0	0			0	0	0
31	e13WT1_dapi_khg_mtmg_flank_009.nd2	10.76	8.58	6.5	0	0	0			0.604089	0.648622	37.1633
32	e13WT1_dapi_khg_mtmg_flank_009.nd2	10.7	10.69	0.5	0	0	0			0.046729	0.046746	2.67835
33	e13WT1_dapi_khg_mtmg_flank_009.nd2	12.66	12.66	0	0	0	0			0	0	0
34	e13WT1_dapi_khg_mtmg_flank_010.nd2	10.38	10.08	2.5	0	0	0			0.240848	0.243239	13.9366
35	e13WT1_dapi_khg_mtmg_flank_010.nd2	10.49	10.05	3	0	0	0			0.285987	0.290036	16.6178
36	e13WT1_dapi_khg_mtmg_flank_010.nd2	8.73	6.34	6	0	0	0			0.687285	0.757745	43.4156
37	e13WT2_dapi_khg_mtmg_flank_001.nd2	6.42	5.38	3.5	0	0	0			0.545171	0.576593	33.0364
38	e13WT2_dapi_khg_mtmg_flank_001.nd2	10.03	10.02	0.5	0	0	0			0.0498504	0.0498711	2.8574
39	e13WT2_dapi_khg_mtmg_flank_002.nd2	10.11	10.11	0	0	0	0			0	0	0
40	e13WT2_dapi_khg_mtmg_flank_003.nd2	13.7	13.67	1	0	0	0			0.0729927	0.0730577	4.1859
41	e13WT2_dapi_khg_mtmg_flank_003.nd2	10.31	10.12	2	0	0	0			0.193986	0.195224	11.1855
42	e13WT2_dapi_khg_mtmg_flank_003.nd2	10.25	9.94	2.5	0	0	0			0.243902	0.246388	14.117
43	e13WT2_dapi_khg_mtmg_flank_004.nd2	4.41	3.93	2	0	0	0			0.453515	0.470705	26.9694
44	e13WT2_dapi_khg_mtmg_flank_004.nd2	7.53	6.67	3.5	0	0	0			0.464807	0.483417	27.6978
45	e13WT2_dapi_khg_mtmg_flank_004.nd2	13.6	13.6	0	0	0	0			0	0	0
46	e13WT2_dapi_khg_mtmg_flank_004.nd2	14.4	14.39	0.5	0	0	0			0.0347222	0.0347292	1.98984
47	e13WT2_dapi_khg_mtmg_flank_005.nd2	12.12	12.11	0.5	0	0	0			0.0412541	0.0412658	2.36436
48	e13WT2_dapi_khg_mtmg_flank_005.nd2	9.31	8.97	2.5	0	0	0			0.268528	0.271865	15.5767
49	e13WT2_dapi_khg_mtmg_flank_005.nd2	10.41	10.41	0	0	0	0			0	0	0
50	e13WT2_dapi_khg_mtmg_flank_006.nd2	13.08	12.84	2.5	0	0	0			0.191131	0.192315	11.0188
51	e13WT2_dapi_khg_mtmg_flank_007.nd2	16.06	16.03	1	0	0	0			0.0622665	0.0623068	3.56992
52	e13WT2_dapi_khg_mtmg_flank_007.nd2	7.39	6.21	4	0	0	0			0.541272	0.571949	32.7703
53	e13WT2_dapi_khg_mtmg_flank_007.nd2	9.09	8.87	2	0	0	0			0.220022	0.221837	12.7103
54	e13WT2_dapi_khg_mtmg_flank_007.nd2	10.89	10.89	0	0	0	0			0	0	0
55	e13WT2_dapi_khg_mtmg_flank_008.nd2	9.72	9.24	3	0	0	0			0.308642	0.313765	17.9774
56	e13WT2_dapi_khg_mtmg_flank_008.nd2	7.88	6.47	4.5	0	0	0			0.571066	0.607804	34.8246
57	e13WT2_dapi_khg_mtmg_flank_008.nd2	7.88	7.48	2.5	0	0	0			0.317259	0.322838	18.4972
58	e13WT2_dapi_khg_mtmg_flank_008.nd2	14.31	14.31	0	0	0	0			0	0	0
59	e13WT2_dapi_khg_mtmg_flank_008.nd2	10.37	9.76	3.5	0	0	0			0.337512	0.344273	19.7254
60	e13WT2_dapi_khg_mtmg_flank_008.nd2	10.58	10.54	1	0	0	0			0.094518	0.0946593	5.42358
61	e13WT2_dapi_khg_mtmg_flank_009.nd2	10.19	9.57	3.5	0	0	0			0.343474	0.350613	20.0887
62	e13WT2_dapi_khg_mtmg_flank_009.nd2	12.07	12.06	0.5	0	0	0			0.041425	0.0414369	2.37416
63	e13WT2_dapi_khg_mtmg_flank_010.nd2	11.39	11.38	0.5	0	0	0			0.0438982	0.0439123	2.51599
64	e13WT2_dapi_khg_mtmg_flank_010.nd2	10.68	10.68	0	0	0	0			0	0	0
65	e13WT2_dapi_khg_mtmg_flank_010.nd2	14.63	14.63	0	0	0	0			0	0	0
66	e13WT2_dapi_khg_mtmg_flank_010.nd2	9.6	9.11	3	0	0	0			0.3125	0.317824	18.21
67	e13WT3_dapi_khg_mtmg_flank_001.nd2	8.7	7.12	5	0	0	0			0.574713	0.612253	35.0795
68	e13WT3_dapi_khg_mtmg_flank_001.nd2	9.46	9.45	0.5	0	0	0			0.0528541	0.0528788	3.02973
69	e13WT3_dapi_khg_mtmg_flank_002.nd2	10.59	10.48	1.5	0	0	0			0.141643	0.142121	8.14293
70	e13WT3_dapi_khg_mtmg_flank_002.nd2	11.82	11.73	1.5	0	0	0			0.126904	0.127247	7.2907
71	e13WT3_dapi_khg_mtmg_flank_003.nd2	10.03	9.2	4	0	0	0			0.398804	0.410212	23.5034
72	e13WT3_dapi_khg_mtmg_flank_003.nd2	9.79	9.74	1	0	0	0			0.102145	0.102324	5.86271
73	e13WT3_dapi_khg_mtmg_flank_003.nd2	5.21	2.62	4.5	0	0	0			0.863724	1.04261	59.7373
74	e13WT3_dapi_khg_mtmg_flank_003.nd2	8.32	8.31	0.5	0	0	0			0.0600962	0.0601324	3.44533
75	e13WT3_dapi_khg_mtmg_flank_004.nd2	10.44	10.43	0.5	0	0	0			0.0478927	0.047911	2.7451
76	e13WT3_dapi_khg_mtmg_flank_004.nd2	5.85	5.02	3	0	0	0			0.512821	0.538467	30.8519
77	e13WT3_dapi_khg_mtmg_flank_004.nd2	9.41	9.2	2	0	0	0			0.21254	0.214173	12.2712
78	e13WT3_dapi_khg_mtmg_flank_004.nd2	8.34	7.02	4.5	0	0	0			0.539568	0.569924	32.6543
79	e13WT3_dapi_khg_mtmg_flank_004.nd2	10.42	10.41	0.5	0	0	0			0.0479846	0.0480031	2.75037
80	e13WT3_dapi_khg_mtmg_flank_004.nd2	10.69	10.1	3.5	0	0	0			0.327409	0.33356	19.1116
81	e13WT3_dapi_khg_mtmg_flank_005.nd2	11.32	11.32	0	0	0	0			0	0	0
82	e13WT3_dapi_khg_mtmg_flank_006.nd2	12.19	12.15	1	0	0	0			0.0820345	0.0821267	4.70552
83	e13WT3_dapi_khg_mtmg_flank_006.nd2	8.04	8.04	0	0	0	0			0	0	0
84	e13WT3_dapi_khg_mtmg_flank_006.nd2	9.23	9.17	1	0	0	0			0.108342	0.108555	6.21977
85	e13WT3_dapi_khg_mtmg_flank_006.nd2	11	10.71	2.5	0	0	0			0.227273	0.229276	13.1366
86	e13WT3_dapi_khg_mtmg_flank_007.nd2	9.27	9.27	0	0	0	0			0	0	0
87	e13WT3_dapi_khg_mtmg_flank_007.nd2	11.25	11.24	0.5	0	0	0			0.0444444	0.0444591	2.54732
88	e13WT3_dapi_khg_mtmg_flank_007.nd2	10.98	9.77	5	0	0	0			0.455373	0.472792	27.089
89	e13WT3_dapi_khg_mtmg_flank_007.nd2	10.86	9.88	4.5	0	0	0			0.414365	0.427245	24.4793
90	e13WT3_dapi_khg_mtmg_flank_008.nd2	14.72	14.68	1	0	0	0			0.0679348	0.0679871	3.89538
91	e13WT3_dapi_khg_mtmg_flank_008.nd2	12.3	12.14	2	0	0	0			0.162602	0.163327	9.35794
92	e13WT3_dapi_khg_mtmg_flank_009.nd2	9.42	4.97	8	0	0	0			0.849257	1.01458	58.1309
93	e13WT3_dapi_khg_mtmg_flank_009.nd2	11.14	11.13	0.5	0	0	0			0.0448833	0.0448984	2.57249
94	e13WT3_dapi_khg_mtmg_flank_009.nd2	12.66	12.65	0.5	0	0	0			0.0394945	0.0395047	2.26346
95	e13WT3_dapi_khg_mtmg_flank_010.nd2	10.41	10.41	0	0	0	0			0	0	0
96	e13WT3_dapi_khg_mtmg_flank_010.nd2	10.18	10.14	1	0	0	0			0.0982318	0.0983905	5.63736
97	e13WT3_dapi_khg_mtmg_flank_010.nd2	6.96	6.01	3.5	0	0	0			0.502874	0.52692	30.1903
98	e13WT3_dapi_khg_mtmg_flank_010.nd2	9.06	6.31	6.5	0	0	0			0.717439	0.800119	45.8435
99	e13WT3_dapi_khg_mtmg_flank_010.nd2	8.59	6.15	6	0	0	0			0.698487	0.773281	44.3057
100	e13WT1_dapi_khg_mtmg_between_001.nd2	13.13	13.13	0	0	0	0			0	0	0
101	e13WT1_dapi_khg_mtmg_between_001.nd2	14.29	14.07	2.5	0	0	0			0.174948	0.175852	10.0756
102	e13WT1_dapi_khg_mtmg_between_001.nd2	12.68	12.67	0.5	0	0	0			0.0394322	0.0394424	2.25988
103	e13WT1_dapi_khg_mtmg_between_001.nd2	10.27	10.26	0.5	0	0	0			0.0486855	0.0487047	2.79058
104	e13WT1_dapi_khg_mtmg_between_002.nd2	13.72	13.72	0	0	0	0			0	0	0
105	e13WT1_dapi_khg_mtmg_between_002.nd2	11.38	11.28	1.5	0	0	0			0.13181	0.132195	7.57421
106	e13WT1_dapi_khg_mtmg_between_002.nd2	13.07	12.44	4	0	0	0			0.306044	0.311035	17.821
107	e13WT1_dapi_khg_mtmg_between_003.nd2	7.53	7.1	2.5	0	0	0			0.332005	0.338429	19.3905
108	e13WT1_dapi_khg_mtmg_between_003.nd2	11.76	11.72	1	0	0	0			0.085034	0.0851368	4.87798
109	e13WT1_dapi_khg_mtmg_between_003.nd2	14.07	14.04	1	0	0	0			0.0710732	0.0711332	4.07563
110	e13WT1_dapi_khg_mtmg_between_003.nd2	12.48	12.44	1	0	0	0			0.0801282	0.0802142	4.59594
111	e13WT1_dapi_khg_mtmg_between_003.nd2	6.54	5.53	3.5	0	0	0			0.535168	0.564707	32.3553
112	e13WT1_dapi_khg_mtmg_between_004.nd2	12.58	12.54	1	0	0	0			0.0794913	0.0795752	4.55932
113	e13WT1_dapi_khg_mtmg_between_004.nd2	9.07	8.37	3.5	0	0	0			0.385888	0.39617	22.6989
114	e13WT1_dapi_khg_mtmg_between_004.nd2	8.33	8.27	1	0	0	0			0.120048	0.120338	6.89487
115	e13WT1_dapi_khg_mtmg_between_005.nd2	9.08	9.08	0	0	0	0			0	0	0
116	e13WT1_dapi_khg_mtmg_between_005.nd2	9.81	9.34	3	0	0	0			0.30581	0.310789	17.8069
117	e13WT1_dapi_khg_mtmg_between_005.nd2	9.29	9.24	1	0	0	0			0.107643	0.107852	6.17944
118	e13WT1_dapi_khg_mtmg_between_007.nd2	5.64	2.61	5	0	0	0			0.886525	1.08978	62.4398
119	e13WT1_dapi_khg_mtmg_between_007.nd2	11.8	11.41	3	0	0	0			0.254237	0.257059	14.7284
120	e13WT1_dapi_khg_mtmg_between_007.nd2	9.68	9.35	2.5	0	0	0			0.258264	0.261225	14.9671
121	e13WT1_dapi_khg_mtmg_between_007.nd2	12.67	12.66	0.5	0	0	0			0.0394633	0.0394735	2.26167
122	e13WT1_dapi_khg_mtmg_between_008.nd2	8.85	8.13	3.5	0	0	0			0.39548	0.406591	23.2959
123	e13WT1_dapi_khg_mtmg_between_008.nd2	9.55	8.67	4	0	0	0			0.418848	0.432176	24.7619
124	e13WT1_dapi_khg_mtmg_between_008.nd2	10.21	9.59	3.5	0	0	0			0.342801	0.349897	20.0476
125	e13WT1_dapi_khg_mtmg_between_008.nd2	10.47	9.45	4.5	0	0	0			0.429799	0.444271	25.4548
126	e13WT1_dapi_khg_mtmg_between_008.nd2	11.02	10.6	3	0	0	0			0.272232	0.275712	15.7971
127	e13WT1_dapi_khg_mtmg_between_009.nd2	7.56	7.49	1	0	0	0			0.132275	0.132664	7.60108
128	e13WT1_dapi_khg_mtmg_between_009.nd2	10.4	10.35	1	0	0	0			0.0961538	0.0963026	5.51773
129	e13WT1_dapi_khg_mtmg_between_009.nd2	11	10.99	0.5	0	0	0			0.0454545	0.0454702	2.60525
130	e13WT1_dapi_khg_mtmg_between_010.nd2	12.05	12.03	0.5	0	0	0			0.0414938	0.0415057	2.3781
131	e13WT1_dapi_khg_mtmg_between_010.nd2	8.11	7.05	4	0	0	0			0.493218	0.515785	29.5523
132	e13WT1_dapi_khg_mtmg_between_010.nd2	7.09	6.63	2.5	0	0	0			0.352609	0.360358	20.647
133	e13WT2_dapi_khg_mtmg_between_001.nd2	14.64	14.63	0.5	0	0	0			0.034153	0.0341596	1.9572
134	e13WT2_dapi_khg_mtmg_between_002.nd2	11.68	11.66	0.5	0	0	0			0.0428082	0.0428213	2.45348
135	e13WT2_dapi_khg_mtmg_between_002.nd2	9.64	9.59	1	0	0	0			0.103734	0.103921	5.95426
136	e13WT2_dapi_khg_mtmg_between_003.nd2	12.34	12.3	1	0	0	0			0.0810373	0.0811262	4.64819
137	e13WT2_dapi_khg_mtmg_between_004.nd2	11.78	11.77	0.5	0	0	0			0.0424448	0.0424576	2.43264
138	e13WT2_dapi_khg_mtmg_between_004.nd2	14.36	14.28	1.5	0	0	0			0.104457	0.104648	5.99587
139	e13WT2_dapi_khg_mtmg_between_004.nd2	9.53	8.66	4	0	0	0			0.419727	0.433145	24.8174
140	e13WT2_dapi_khg_mtmg_between_004.nd2	11.61	10.9	4	0	0	0			0.344531	0.351739	20.1531
141	e13WT2_dapi_khg_mtmg_between_004.nd2	12.17	12.08	1.5	0	0	0			0.123254	0.123568	7.07993
142	e13WT2_dapi_khg_mtmg_between_004.nd2	11.74	11.7	1	0	0	0			0.0851789	0.0852822	4.88631
143	e13WT2_dapi_khg_mtmg_between_005.nd2	12	11.83	2	0	0	0			0.166667	0.167448	9.59407
144	e13WT2_dapi_khg_mtmg_between_005.nd2	8.61	8.61	0	0	0	0			0	0	0
145	e13WT2_dapi_khg_mtmg_between_006.nd2	9.55	9.54	0.5	0	0	0			0.052356	0.05238	3.00115
146	e13WT2_dapi_khg_mtmg_between_006.nd2	9.48	9.43	1	0	0	0			0.105485	0.105682	6.05512
147	e13WT2_dapi_khg_mtmg_between_007.nd2	10.12	10.12	0	0	0	0			0	0	0
148	e13WT2_dapi_khg_mtmg_between_007.nd2	13.67	13.67	0	0	0	0			0	0	0
149	e13WT2_dapi_khg_mtmg_between_008.nd2	13.54	13.53	0.5	0	0	0			0.0369276	0.036936	2.11628
150	e13WT2_dapi_khg_mtmg_between_008.nd2	9.33	9.11	2	0	0	0			0.214362	0.216039	12.3781
151	e13WT2_dapi_khg_mtmg_between_009.nd2	10.05	9.85	2	0	0	0			0.199005	0.200342	11.4788
152	e13WT2_dapi_khg_mtmg_between_009.nd2	10.15	10.1	1	0	0	0			0.0985222	0.0986823	5.65408
153	e13WT2_dapi_khg_mtmg_between_009.nd2	9.43	8.29	4.5	0	0	0			0.4772	0.497466	28.5027
154	e13WT2_dapi_khg_mtmg_between_009.nd2	13.53	13.52	0.5	0	0	0			0.0369549	0.0369633	2.11784
155	e13WT2_dapi_khg_mtmg_between_010.nd2	11.97	11.93	1	0	0	0			0.0835422	0.0836397	4.7922
156	e13WT2_dapi_khg_mtmg_between_010.nd2	13.95	13.95	0	0	0	0			0	0	0
157	e13WT2_dapi_khg_mtmg_between_010.nd2	10.62	10.61	0.5	0	0	0			0.047081	0.0470984	2.69854
158	e13WT3_dapi_khg_mtmg_between_001.nd2	12.37	12.36	0.5	0	0	0			0.0404204	0.0404314	2.31655
159	e13WT3_dapi_khg_mtmg_between_001.nd2	7.77	7.17	3	0	0	0			0.3861	0.3964	22.7121
160	e13WT3_dapi_khg_mtmg_between_001.nd2	12.25	12.21	1	0	0	0			0.0816327	0.0817236	4.68242
161	e13WT3_dapi_khg_mtmg_between_001.nd2	10.57	10.46	1.5	0	0	0			0.141911	0.142392	8.15845
162	e13WT3_dapi_khg_mtmg_between_002.nd2	13.68	13.64	1	0	0	0			0.0730994	0.0731647	4.19203
163	e13WT3_dapi_khg_mtmg_between_002.nd2	9.37	8.22	4.5	0	0	0			0.480256	0.500947	28.7021
164	e13WT3_dapi_khg_mtmg_between_002.nd2	10.76	10.75	0.5	0	0	0			0.0464684	0.0464851	2.6634
165	e13WT3_dapi_khg_mtmg_between_003.nd2	7.96	7.82	1.5	0	0	0			0.188442	0.189576	10.8619
166	e13WT3_dapi_khg_mtmg_between_003.nd2	11.71	11.71	0	0	0	0			0	0	0
167	e13WT3_dapi_khg_mtmg_between_003.nd2	8.98	8.97	0.5	0	0	0			0.0556793	0.0557081	3.19184
168	e13WT3_dapi_khg_mtmg_between_003.nd2	10.8	10.76	1	0	0	0			0.0925926	0.0927254	5.31277
169	e13WT3_dapi_khg_mtmg_between_003.nd2	7.26	5.7	4.5	0	0	0			0.619835	0.668532	38.3041
170	e13WT3_dapi_khg_mtmg_between_003.nd2	7.72	3.25	7	0	0	0			0.906736	1.13548	65.0581
171	e13WT3_dapi_khg_mtmg_between_003.nd2	11.51	11.23	2.5	0	0	0			0.217202	0.218948	12.5448
172	e13WT3_dapi_khg_mtmg_between_003.nd2	11.63	11.23	3	0	0	0			0.257954	0.260903	14.9487
173	e13WT3_dapi_khg_mtmg_between_003.nd2	12.57	12.56	0.5	0	0	0			0.0397772	0.0397877	2.27967
174	e13WT3_dapi_khg_mtmg_between_003.nd2	7.24	7.24	0	0	0	0			0	0	0
175	e13WT3_dapi_khg_mtmg_between_004.nd2	9.36	9.31	1	0	0	0			0.106838	0.107042	6.13305
176	e13WT3_dapi_khg_mtmg_between_004.nd2	11.43	11.03	3	0	0	0			0.262467	0.265578	15.2165
177	e13WT3_dapi_khg_mtmg_between_005.nd2	9.35	8.67	3.5	0	0	0			0.374332	0.383676	21.983
178	e13WT3_dapi_khg_mtmg_between_005.nd2	13.06	12.26	4.5	0	0	0			0.344564	0.351774	20.1552
179	e13WT3_dapi_khg_mtmg_between_005.nd2	14.95	14.94	0.5	0	0	0			0.0334448	0.0334511	1.9166
180	e13WT3_dapi_khg_mtmg_between_006.nd2	12.45	12.35	1.5	0	0	0			0.120482	0.120775	6.91992
181	e13WT3_dapi_khg_mtmg_between_006.nd2	9.01	9.01	0	0	0	0			0	0	0
182	e13WT3_dapi_khg_mtmg_between_006.nd2	6.43	4.6	4.5	0	0	0			0.699844	0.77518	44.4145
183	e13WT3_dapi_khg_mtmg_between_006.nd2	6.83	6.76	1	0	0	0			0.146413	0.146941	8.4191
184	e13WT3_dapi_khg_mtmg_between_006.nd2	8.57	8.55	0.5	0	0	0			0.0583431	0.0583762	3.34471
185	e13WT3_dapi_khg_mtmg_between_006.nd2	11.76	11.05	4	0	0	0			0.340136	0.347062	19.8852
186	e13WT3_dapi_khg_mtmg_between_006.nd2	10.49	10.38	1.5	0	0	0			0.142993	0.143485	8.22109
187	e13WT3_dapi_khg_mtmg_between_006.nd2	11.72	11.71	0.5	0	0	0			0.0426621	0.0426751	2.4451
188	e13WT3_dapi_khg_mtmg_between_006.nd2	10.26	10.15	1.5	0	0	0			0.146199	0.146725	8.40671
189	e13WT3_dapi_khg_mtmg_between_007.nd2	9.52	8.64	4	0	0	0			0.420168	0.433631	24.8452
190	e13WT3_dapi_khg_mtmg_between_007.nd2	10.19	10.14	1	0	0	0			0.0981354	0.0982936	5.63181
191	e13WT3_dapi_khg_mtmg_between_007.nd2	10.27	9.96	2.5	0	0	0			0.243427	0.245898	14.0889
192	e13WT3_dapi_khg_mtmg_between_007.nd2	14.12	14.11	0.5	0	0	0			0.0354108	0.0354182	2.02931
193	e13WT3_dapi_khg_mtmg_between_007.nd2	12.08	11.7	3	0	0	0			0.248344	0.250971	14.3796
194	e13WT3_dapi_khg_mtmg_between_008.nd2	11.89	11.88	0.5	0	0	0			0.0420521	0.0420645	2.41012
195	e13WT3_dapi_khg_mtmg_between_008.nd2	13.38	13.04	3	0	0	0			0.224215	0.226138	12.9567
196	e13WT3_dapi_khg_mtmg_between_008.nd2	7.28	1.98	7	0	0	0			0.961538	1.29255	74.0576
197	e13WT3_dapi_khg_mtmg_between_009.nd2	8.65	8.42	2	0	0	0			0.231214	0.233325	13.3685
198	e13WT3_dapi_khg_mtmg_between_009.nd2	13.34	13.34	0	0	0	0			0	0	0
199	e13WT3_dapi_khg_mtmg_between_009.nd2	9.11	9.11	0	0	0	0			0	0	0
200	e13WT3_dapi_khg_mtmg_between_009.nd2	11.73	11.34	3	0	0	0			0.255754	0.258628	14.8183
201	e13WT3_dapi_khg_mtmg_between_009.nd2	11.92	11.65	2.5	0	0	0			0.209732	0.2113	12.1066
202	e13WT3_dapi_khg_mtmg_between_009.nd2	8.64	8.62	0.5	0	0	0			0.0578704	0.0579027	3.31758
203	e13WT3_dapi_khg_mtmg_between_009.nd2	7.06	6.6	2.5	0	0	0			0.354108	0.36196	20.7388
204	e13WT3_dapi_khg_mtmg_between_009.nd2	13.62	13.62	0	0	0	0			0	0	0
205	e13WT3_dapi_khg_mtmg_between_009.nd2	6.26	1.79	6	0	0	0			0.958466	1.28158	73.4289
206	e13WT3_dapi_khg_mtmg_between_010.nd2	14.04	13.96	1.5	0	0	0			0.106838	0.107042	6.13305
207	e13WT3_dapi_khg_mtmg_between_010.nd2	10.62	9.62	4.5	0	0	0			0.423729	0.437558	25.0702
208	e13WT3_dapi_khg_mtmg_between_010.nd2	12.14	12.13	0.5	0	0	0			0.0411862	0.0411978	2.36046
Item	Source	Length [µm] xyz	Length [µm] xy	Height [µm]	ND.T	ND.Z	ND.M	Comment		sin theta	angle_radians	angle_degrees
1	E13TmLpFlank_dapi_khg_mtmg_fz6_001.nd2	11.7	10.58	5	0	0	0			0.42735	0.44156	25.2995
2	E13TmLpFlank_dapi_khg_mtmg_fz6_001.nd2	8.35	5.24	6.5	0	0	0			0.778443	0.892182	51.1182
3	E13TmLpFlank_dapi_khg_mtmg_fz6_001.nd2	8.44	6.8	5	0	0	0			0.592417	0.634056	36.3287
4	E13TmLpFlank_dapi_khg_mtmg_fz6_001.nd2	7.53	5.63	5	0	0	0			0.664011	0.72617	41.6065
5	E13TmLpFlank_dapi_khg_mtmg_fz6_002.nd2	7	4.34	5.5	0	0	0			0.785714	0.90385	51.7868
6	E13TmLpFlank_dapi_khg_mtmg_fz6_002.nd2	7.75	4.22	6.5	0	0	0			0.83871	0.994909	57.0041
7	E13TmLpFlank_dapi_khg_mtmg_fz6_002.nd2	8.51	8.14	2.5	0	0	0			0.293772	0.298171	17.0839
8	E13TmLpFlank_dapi_khg_mtmg_fz6_002.nd2	8.59	7.31	4.5	0	0	0			0.523865	0.551382	31.5919
9	E13TmLpFlank_dapi_khg_mtmg_fz6_003.nd2	9	7.49	5	0	0	0			0.555556	0.589031	33.749
10	E13TmLpFlank_dapi_khg_mtmg_fz6_003.nd2	7.37	6.73	3	0	0	0			0.407056	0.419228	24.02
11	E13TmLpFlank_dapi_khg_mtmg_fz6_003.nd2	7.91	6.83	4	0	0	0			0.505689	0.53018	30.3771
12	E13TmLpFlank_dapi_khg_mtmg_fz6_004.nd2	6.32	4.44	4.5	0	0	0			0.712025	0.792378	45.3999
13	E13TmLpFlank_dapi_khg_mtmg_fz6_004.nd2	6.94	6.47	2.5	0	0	0			0.360231	0.368515	21.1144
14	E13TmLpFlank_dapi_khg_mtmg_fz6_004.nd2	11.5	11.49	0.5	0	0	0			0.0434783	0.043492	2.49191
15	E13TmLpFlank_dapi_khg_mtmg_fz6_005.nd2	7.64	7.64	0	0	0	0			0	0	0
16	E13TmLpFlank_dapi_khg_mtmg_fz6_006.nd2	11.05	10.86	2	0	0	0			0.180995	0.181999	10.4277
17	E13TmLpFlank_dapi_khg_mtmg_fz6_006.nd2	5.71	5.13	2.5	0	0	0			0.437828	0.453182	25.9654
18	E13TmLpFlank_dapi_khg_mtmg_fz6_006.nd2	8.28	7.25	4	0	0	0			0.483092	0.504182	28.8875
19	E13TmLpFlank_dapi_khg_mtmg_fz6_007.nd2	12.39	12.38	0.5	0	0	0			0.0403551	0.0403661	2.31281
20	E13TmLpFlank_dapi_khg_mtmg_fz6_007.nd2	9.16	8.81	2.5	0	0	0			0.272926	0.276433	15.8384
21	E13TmLpFlank_dapi_khg_mtmg_fz6_008.nd2	7.36	6.17	4	0	0	0			0.543478	0.574575	32.9207
22	E13TmLpFlank_dapi_khg_mtmg_fz6_008.nd2	9.04	8.69	2.5	0	0	0			0.276549	0.280201	16.0543
23	E13TmLpFlank_dapi_khg_mtmg_fz6_008.nd2	11.86	11.85	0.5	0	0	0			0.0421585	0.042171	2.41622
24	E13TmLpFlank_dapi_khg_mtmg_fz6_009.nd2	11.65	11.38	2.5	0	0	0			0.214592	0.216274	12.3916
25	E13TmLpFlank_dapi_khg_mtmg_fz6_009.nd2	7.49	6.34	4	0	0	0			0.534045	0.563378	32.2792
26	E13TmLpFlank_dapi_khg_mtmg_fz6_009.nd2	6.29	4.39	4.5	0	0	0			0.715421	0.797227	45.6777
27	E13TmLpFlank_dapi_khg_mtmg_fz6_009.nd2	5.57	3.29	4.5	0	0	0			0.807899	0.940579	53.8912
28	E13TmLpFlank_dapi_khg_mtmg_fz6_010.nd2	12.58	12.08	3.5	0	0	0			0.278219	0.28194	16.154
29	E13TmLpFlank_dapi_khg_mtmg_fz6_011.nd2	10.24	8.94	5	0	0	0			0.488281	0.510119	29.2277
30	E13TmLpFlank_dapi_khg_mtmg_fz6_011.nd2	14.45	14.37	1.5	0	0	0			0.103806	0.103994	5.95839
31	E13TmLpFlank_dapi_khg_mtmg_fz6_011.nd2	12.58	12.57	0.5	0	0	0			0.0397456	0.0397561	2.27786
32	E13TmLpFlank_dapi_khg_mtmg_fz6_012.nd2	6.49	2.49	6	0	0	0			0.924499	1.17972	67.593
33	E13TmLpFlank_dapi_khg_mtmg_fz6_012.nd2	6.27	4.83	4	0	0	0			0.637959	0.691844	39.6398
34	E13TmLpFlank_dapi_khg_mtmg_fz6_012.nd2	9.55	9.43	1.5	0	0	0			0.157068	0.157721	9.03676
35	E13TmLpFlank_dapi_khg_mtmg_fz6_013.nd2	6.11	5.01	3.5	0	0	0			0.572831	0.609956	34.9479
36	E13TmLpFlank_dapi_khg_mtmg_fz6_014.nd2	9.71	8.85	4	0	0	0			0.411946	0.424589	24.3272
37	E13TmLpFlank_dapi_khg_mtmg_fz6_014.nd2	14.46	14.42	1	0	0	0			0.0691563	0.0692115	3.96553
38	E13TmLpFlank_dapi_khg_mtmg_fz6_014.nd2	6.74	3.07	6	0	0	0			0.890208	1.0978	62.8994
39	E13TmLpFlank_dapi_khg_mtmg_fz6_015.nd2	11.97	11.96	0.5	0	0	0			0.0417711	0.0417833	2.394
40	E13TmLpFlank_dapi_khg_mtmg_fz6_015.nd2	6.95	5.29	4.5	0	0	0			0.647482	0.704276	40.352
41	E13TmLpFlank_dapi_khg_mtmg_fz6_015.nd2	8.46	8.45	0.5	0	0	0			0.0591017	0.0591361	3.38825
42	E13TmLpFlank_dapi_khg_mtmg_fz6_015.nd2	9.33	9.11	2	0	0	0			0.214362	0.216039	12.3781
43	E13TmLpIntermed_dapi_khg_mtmg_fz6_001.nd2	13.49	12.53	5	0	0	0			0.370645	0.379703	21.7554
44	E13TmLpIntermed_dapi_khg_mtmg_fz6_001.nd2	11.71	11.44	2.5	0	0	0			0.213493	0.215149	12.3271
45	E13TmLpIntermed_dapi_khg_mtmg_fz6_001.nd2	8.37	8.13	2	0	0	0			0.238949	0.241283	13.8245
46	E13TmLpIntermed_dapi_khg_mtmg_fz6_001.nd2	5.25	5.25	0	0	0	0			0	0	0
47	E13TmLpIntermed_dapi_khg_mtmg_fz6_002.nd2	12.26	11.59	4	0	0	0			0.326264	0.332349	19.0422
48	E13TmLpIntermed_dapi_khg_mtmg_fz6_002.nd2	7.5	5.58	5	0	0	0			0.666667	0.729728	41.8103
49	E13TmLpIntermed_dapi_khg_mtmg_fz6_002.nd2	11.92	11.39	3.5	0	0	0			0.293624	0.298016	17.0751
50	E13TmLpIntermed_dapi_khg_mtmg_fz6_002.nd2	12.18	11.81	3	0	0	0			0.246305	0.248866	14.259
51	E13TmLpIntermed_dapi_khg_mtmg_fz6_002.nd2	13.53	13.53	0	0	0	0			0	0	0
52	E13TmLpIntermed_dapi_khg_mtmg_fz6_003.nd2	8.51	8.14	2.5	0	0	0			0.293772	0.298171	17.0839
53	E13TmLpIntermed_dapi_khg_mtmg_fz6_003.nd2	9.58	9.24	2.5	0	0	0			0.26096	0.264017	15.1271
54	E13TmLpIntermed_dapi_khg_mtmg_fz6_004.nd2	10.29	10.24	1	0	0	0			0.0971817	0.0973354	5.5769
55	E13TmLpIntermed_dapi_khg_mtmg_fz6_004.nd2	12.53	11.88	4	0	0	0			0.319234	0.324921	18.6166
56	E13TmLpIntermed_dapi_khg_mtmg_fz6_004.nd2	10.67	10.24	3	0	0	0			0.281162	0.285005	16.3296
57	E13TmLpIntermed_dapi_khg_mtmg_fz6_004.nd2	10.69	10.64	1	0	0	0			0.0935454	0.0936823	5.3676
58	E13TmLpIntermed_dapi_khg_mtmg_fz6_005.nd2	10.99	8.47	7	0	0	0			0.636943	0.690526	39.5642
59	E13TmLpIntermed_dapi_khg_mtmg_fz6_005.nd2	9.45	2.88	9	0	0	0			0.952381	1.26095	72.2472
60	E13TmLpIntermed_dapi_khg_mtmg_fz6_005.nd2	7.87	7.81	1	0	0	0			0.127065	0.127409	7.30001
61	E13TmLpIntermed_dapi_khg_mtmg_fz6_005.nd2	11.98	11.29	4	0	0	0			0.33389	0.340427	19.505
62	E13TmLpIntermed_dapi_khg_mtmg_fz6_005.nd2	12.05	9.43	7.5	0	0	0			0.622407	0.671814	38.4921
63	E13TmLpIntermed_dapi_khg_mtmg_fz6_006.nd2	10.25	8.65	5.5	0	0	0			0.536585	0.566385	32.4515
64	E13TmLpIntermed_dapi_khg_mtmg_fz6_006.nd2	10.09	10.08	0.5	0	0	0			0.049554	0.0495743	2.8404
65	E13TmLpIntermed_dapi_khg_mtmg_fz6_006.nd2	11.88	11.35	3.5	0	0	0			0.294613	0.29905	17.1343
66	E13TmLpIntermed_dapi_khg_mtmg_fz6_007.nd2	11.58	11.49	1.5	0	0	0			0.129534	0.129899	7.44265
67	E13TmLpIntermed_dapi_khg_mtmg_fz6_007.nd2	6.9	6.9	0	0	0	0			0	0	0
68	E13TmLpIntermed_dapi_khg_mtmg_fz6_007.nd2	11.58	10.87	4	0	0	0			0.345423	0.35269	20.2076
69	E13TmLpIntermed_dapi_khg_mtmg_fz6_007.nd2	12.46	9.95	7.5	0	0	0			0.601926	0.645911	37.008
70	E13TmLpIntermed_dapi_khg_mtmg_fz6_008.nd2	10.38	9.1	5	0	0	0			0.481696	0.502589	28.7962
71	E13TmLpIntermed_dapi_khg_mtmg_fz6_008.nd2	6.78	3.96	5.5	0	0	0			0.811209	0.946217	54.2143
72	E13TmLpIntermed_dapi_khg_mtmg_fz6_008.nd2	12.68	11.85	4.5	0	0	0			0.35489	0.362796	20.7867
73	E13TmLpIntermed_dapi_khg_mtmg_fz6_008.nd2	9.13	8.78	2.5	0	0	0			0.273823	0.277365	15.8919
74	E13TmLpIntermed_dapi_khg_mtmg_fz6_008.nd2	8.95	8.9	1	0	0	0			0.111732	0.111966	6.41516
75	E13TmLpIntermed_dapi_khg_mtmg_fz6_009.nd2	8.1	4.83	6.5	0	0	0			0.802469	0.931422	53.3665
76	E13TmLpIntermed_dapi_khg_mtmg_fz6_009.nd2	10.97	10.96	0.5	0	0	0			0.0455789	0.0455946	2.61238
77	E13TmLpIntermed_dapi_khg_mtmg_fz6_009.nd2	11.59	9.92	6	0	0	0			0.517688	0.544146	31.1773
78	E13TmLpIntermed_dapi_khg_mtmg_fz6_009.nd2	10.82	10.05	4	0	0	0			0.369686	0.378671	21.6962
79	E13TmLpIntermed_dapi_khg_mtmg_fz6_009.nd2	10.98	8.46	7	0	0	0			0.637523	0.691279	39.6073
80	E13TmLpIntermed_dapi_khg_mtmg_fz6_009.nd2	15.64	15.6	1	0	0	0			0.0639386	0.0639823	3.66591
81	E13TmLpIntermed_dapi_khg_mtmg_fz6_010.nd2	6.01	0.32	6	0	0	0			0.998336	1.5131	86.6943
82	E13TmLpIntermed_dapi_khg_mtmg_fz6_010.nd2	11.65	11.64	0.5	0	0	0			0.0429185	0.0429316	2.4598
83	E13TmLpIntermed_dapi_khg_mtmg_fz6_011.nd2	15.96	15.95	0.5	0	0	0			0.0313283	0.0313334	1.79527
84	E13TmLpIntermed_dapi_khg_mtmg_fz6_011.nd2	11.55	11.54	0.5	0	0	0			0.04329	0.0433036	2.48111
85	E13TmLpIntermed_dapi_khg_mtmg_fz6_011.nd2	8.38	7.62	3.5	0	0	0			0.417661	0.43087	24.687
86	E13TmLpIntermed_dapi_khg_mtmg_fz6_012.nd2	15.06	15.06	0	0	0	0			0	0	0
87	E13TmLpIntermed_dapi_khg_mtmg_fz6_012.nd2	10.89	10.89	0	0	0	0			0	0	0
88	E13TmLpIntermed_dapi_khg_mtmg_fz6_012.nd2	6.77	3.13	6	0	0	0			0.886263	1.08921	62.4073
89	E13TmLpIntermed_dapi_khg_mtmg_fz6_013.nd2	9.31	9.31	0	0	0	0			0	0	0
90	E13TmLpIntermed_dapi_khg_mtmg_fz6_013.nd2	5.35	5.32	0.5	0	0	0			0.0934579	0.0935945	5.36257
91	E13TmLpIntermed_dapi_khg_mtmg_fz6_014.nd2	8.52	8.14	2.5	0	0	0			0.293427	0.29781	17.0633
92	E13TmLpIntermed_dapi_khg_mtmg_fz6_014.nd2	10.3	10.11	2	0	0	0			0.194175	0.195416	11.1965
93	E13TmLpIntermed_dapi_khg_mtmg_fz6_014.nd2	10.21	10.16	1	0	0	0			0.0979432	0.0981005	5.62074
94	E13TmLpIntermed_dapi_khg_mtmg_fz6_015.nd2	10.03	8.96	4.5	0	0	0			0.448654	0.465259	26.6574
95	E13TmLpIntermed_dapi_khg_mtmg_fz6_015.nd2	11.12	11.12	0	0	0	0			0	0	0
96	E13V2TmFlank_dapi_khg_mtmg_fz6_001.nd2	8.64	8.51	1.5	0	0	0			0.173611	0.174495	9.99784
97	E13V2TmFlank_dapi_khg_mtmg_fz6_001.nd2	9.25	4.65	8	0	0	0			0.864865	1.04488	59.8673
98	E13V2TmFlank_dapi_khg_mtmg_fz6_002.nd2	10.82	10.77	1	0	0	0			0.0924214	0.0925535	5.30293
99	E13V2TmFlank_dapi_khg_mtmg_fz6_002.nd2	8.18	6.83	4.5	0	0	0			0.550122	0.582511	33.3754
100	E13V2TmFlank_dapi_khg_mtmg_fz6_002.nd2	8.25	8.24	0.5	0	0	0			0.0606061	0.0606432	3.4746
101	E13V2TmFlank_dapi_khg_mtmg_fz6_002.nd2	5.78	5.76	0.5	0	0	0			0.0865052	0.0866134	4.96258
102	E13V2TmFlank_dapi_khg_mtmg_fz6_002.nd2	6.53	5.16	4	0	0	0			0.612557	0.659292	37.7747
103	E13V2TmFlank_dapi_khg_mtmg_fz6_003.nd2	8.87	4.74	7.5	0	0	0			0.845547	1.00759	57.7306
104	E13V2TmFlank_dapi_khg_mtmg_fz6_003.nd2	8.47	8.47	0	0	0	0			0	0	0
105	E13V2TmFlank_dapi_khg_mtmg_fz6_003.nd2	4	0	4	0	0	0			1	1.5708	90
106	E13V2TmFlank_dapi_khg_mtmg_fz6_003.nd2	6.15	5.96	1.5	0	0	0			0.243902	0.246388	14.117
107	E13V2TmFlank_dapi_khg_mtmg_fz6_003.nd2	10.16	9.54	3.5	0	0	0			0.344488	0.351694	20.1506
108	E13V2TmFlank_dapi_khg_mtmg_fz6_004.nd2	9.84	9.38	3	0	0	0			0.304878	0.30981	17.7508
109	E13V2TmFlank_dapi_khg_mtmg_fz6_004.nd2	9.61	8.2	5	0	0	0			0.520291	0.547192	31.3518
110	E13V2TmFlank_dapi_khg_mtmg_fz6_004.nd2	6.59	5.58	3.5	0	0	0			0.531108	0.559907	32.0803
111	E13V2TmFlank_dapi_khg_mtmg_fz6_004.nd2	6.92	6.76	1.5	0	0	0			0.216763	0.218497	12.519
112	E13V2TmFlank_dapi_khg_mtmg_fz6_004.nd2	12.89	12.8	1.5	0	0	0			0.116369	0.116634	6.68261
113	E13V2TmFlank_dapi_khg_mtmg_fz6_005.nd2	12.84	12.8	1	0	0	0			0.0778816	0.0779606	4.46681
114	E13V2TmFlank_dapi_khg_mtmg_fz6_005.nd2	8.81	8.68	1.5	0	0	0			0.170261	0.171095	9.803
115	E13V2TmFlank_dapi_khg_mtmg_fz6_005.nd2	11.42	11.38	1	0	0	0			0.0875657	0.087678	5.02358
116	E13V2TmFlank_dapi_khg_mtmg_fz6_006.nd2	8.73	8.6	1.5	0	0	0			0.171821	0.172678	9.89373
117	E13V2TmFlank_dapi_khg_mtmg_fz6_006.nd2	7.51	7.36	1.5	0	0	0			0.199734	0.201086	11.5214
118	E13V2TmFlank_dapi_khg_mtmg_fz6_007.nd2	11.32	11.22	1.5	0	0	0			0.132509	0.1329	7.61459
119	E13V2TmFlank_dapi_khg_mtmg_fz6_007.nd2	12.02	12.02	0	0	0	0			0	0	0
120	E13V2TmFlank_dapi_khg_mtmg_fz6_008.nd2	7.39	5.86	4.5	0	0	0			0.608931	0.654712	37.5122
121	E13V2TmFlank_dapi_khg_mtmg_fz6_008.nd2	6.88	6.86	0.5	0	0	0			0.0726744	0.0727385	4.16761
122	E13V2TmFlank_dapi_khg_mtmg_fz6_008.nd2	10.57	10.47	1.5	0	0	0			0.141911	0.142392	8.15845
123	E13V2TmFlank_dapi_khg_mtmg_fz6_009.nd2	8.53	5.52	6.5	0	0	0			0.762016	0.866421	49.6423
124	E13V2TmFlank_dapi_khg_mtmg_fz6_009.nd2	6.92	6.92	0	0	0	0			0	0	0
125	E13V2TmFlank_dapi_khg_mtmg_fz6_009.nd2	11.04	9.85	5	0	0	0			0.452899	0.470014	26.9298
126	E13V2TmFlank_dapi_khg_mtmg_fz6_010.nd2	8.45	8.07	2.5	0	0	0			0.295858	0.300354	17.209
127	E13V2TmFlank_dapi_khg_mtmg_fz6_011.nd2	9.15	6.9	6	0	0	0			0.655738	0.715159	40.9756
128	E13V2TmFlank_dapi_khg_mtmg_fz6_011.nd2	8.86	8.34	3	0	0	0			0.3386	0.345429	19.7916
129	E13V2TmFlank_dapi_khg_mtmg_fz6_012.nd2	8.85	8.33	3	0	0	0			0.338983	0.345836	19.8149
130	E13V2TmFlank_dapi_khg_mtmg_fz6_012.nd2	11.46	9.77	6	0	0	0			0.52356	0.551024	31.5714
131	E13V2TmFlank_dapi_khg_mtmg_fz6_012.nd2	7.94	3.75	7	0	0	0			0.881612	1.07927	61.8374
132	E13V2TmFlank_dapi_khg_mtmg_fz6_012.nd2	8.65	7.67	4	0	0	0			0.462428	0.480731	27.5439
133	E13V2TmFlank_dapi_khg_mtmg_fz6_013.nd2	12.96	12.87	1.5	0	0	0			0.115741	0.116001	6.64635
134	E13V2TmFlank_dapi_khg_mtmg_fz6_013.nd2	8.79	6.86	5.5	0	0	0			0.625711	0.676043	38.7344
135	E13V2TmFlank_dapi_khg_mtmg_fz6_013.nd2	15.33	15.3	1	0	0	0			0.0652316	0.0652779	3.74015
136	E13V2TmFlank_dapi_khg_mtmg_fz6_013.nd2	13.26	13.26	0	0	0	0			0	0	0
137	E13V2TmFlank_dapi_khg_mtmg_fz6_014.nd2	13.02	12.54	3.5	0	0	0			0.268817	0.272165	15.5939
138	E13V2TmFlank_dapi_khg_mtmg_fz6_014.nd2	8	7.86	1.5	0	0	0			0.1875	0.188616	10.8069
139	E13V2TmFlank_dapi_khg_mtmg_fz6_014.nd2	8.05	5.36	6	0	0	0			0.745342	0.841047	48.1884
140	E13V2TmFlank_dapi_khg_mtmg_fz6_015.nd2	10.83	10.83	0	0	0	0			0	0	0
141	E13V2TmIntermed_dapi_khg_mtmg_fz6_001.nd2	9.29	8.95	2.5	0	0	0			0.269107	0.272465	15.6111
142	E13V2TmIntermed_dapi_khg_mtmg_fz6_002.nd2	8.99	8.97	0.5	0	0	0			0.0556174	0.0556461	3.18828
143	E13V2TmIntermed_dapi_khg_mtmg_fz6_002.nd2	10.75	10.46	2.5	0	0	0			0.232558	0.234707	13.4477
144	E13V2TmIntermed_dapi_khg_mtmg_fz6_002.nd2	8.74	8.2	3	0	0	0			0.343249	0.350374	20.075
145	E13V2TmIntermed_dapi_khg_mtmg_fz6_002.nd2	9.4	9.34	1	0	0	0			0.106383	0.106585	6.10685
146	E13V2TmIntermed_dapi_khg_mtmg_fz6_002.nd2	8.26	7.48	3.5	0	0	0			0.423729	0.437558	25.0702
147	E13V2TmIntermed_dapi_khg_mtmg_fz6_002.nd2	9.12	9.11	0.5	0	0	0			0.0548246	0.0548521	3.14279
148	E13V2TmIntermed_dapi_khg_mtmg_fz6_002.nd2	10.69	9.91	4	0	0	0			0.374181	0.383514	21.9737
149	E13V2TmIntermed_dapi_khg_mtmg_fz6_002.nd2	7.99	6.92	4	0	0	0			0.500626	0.524322	30.0414
150	E13V2TmIntermed_dapi_khg_mtmg_fz6_003.nd2	7.7	5.85	5	0	0	0			0.649351	0.70673	40.4927
151	E13V2TmIntermed_dapi_khg_mtmg_fz6_003.nd2	8.57	6.57	5.5	0	0	0			0.641774	0.696809	39.9242
152	E13V2TmIntermed_dapi_khg_mtmg_fz6_003.nd2	14.06	13.74	3	0	0	0			0.213371	0.215024	12.32
153	E13V2TmIntermed_dapi_khg_mtmg_fz6_004.nd2	9.46	8.97	3	0	0	0			0.317125	0.322696	18.4891
154	E13V2TmIntermed_dapi_khg_mtmg_fz6_004.nd2	8.93	8.81	1.5	0	0	0			0.167973	0.168773	9.66999
155	E13V2TmIntermed_dapi_khg_mtmg_fz6_004.nd2	9.32	9.26	1	0	0	0			0.107296	0.107503	6.15947
156	E13V2TmIntermed_dapi_khg_mtmg_fz6_004.nd2	9.56	7.81	5.5	0	0	0			0.575314	0.612988	35.1216
157	E13V2TmIntermed_dapi_khg_mtmg_fz6_004.nd2	7.72	6.6	4	0	0	0			0.518135	0.544669	31.2072
158	E13V2TmIntermed_dapi_khg_mtmg_fz6_005.nd2	10.93	10.93	0	0	0	0			0	0	0
159	E13V2TmIntermed_dapi_khg_mtmg_fz6_005.nd2	8.82	8.59	2	0	0	0			0.226757	0.228747	13.1062
160	E13V2TmIntermed_dapi_khg_mtmg_fz6_005.nd2	8.89	8.37	3	0	0	0			0.337458	0.344215	19.7221
161	E13V2TmIntermed_dapi_khg_mtmg_fz6_006.nd2	11.52	10.8	4	0	0	0			0.347222	0.354607	20.3175
162	E13V2TmIntermed_dapi_khg_mtmg_fz6_006.nd2	6.6	5.59	3.5	0	0	0			0.530303	0.558958	32.0259
163	E13V2TmIntermed_dapi_khg_mtmg_fz6_007.nd2	7.48	5.56	5	0	0	0			0.668449	0.732122	41.9475
164	E13V2TmIntermed_dapi_khg_mtmg_fz6_008.nd2	9.52	8.64	4	0	0	0			0.420168	0.433631	24.8452
165	E13V2TmIntermed_dapi_khg_mtmg_fz6_008.nd2	9.08	6.34	6.5	0	0	0			0.715859	0.797854	45.7136
166	E13V2TmIntermed_dapi_khg_mtmg_fz6_009.nd2	9.76	9.44	2.5	0	0	0			0.256148	0.259035	14.8416
167	E13V2TmIntermed_dapi_khg_mtmg_fz6_009.nd2	7.5	6.63	3.5	0	0	0			0.466667	0.485518	27.8181
168	E13V2TmIntermed_dapi_khg_mtmg_fz6_009.nd2	10.39	9.11	5	0	0	0			0.481232	0.50206	28.7659
169	E13V2TmIntermed_dapi_khg_mtmg_fz6_009.nd2	11.93	11.92	0.5	0	0	0			0.0419111	0.0419234	2.40204
170	E13V2TmIntermed_dapi_khg_mtmg_fz6_010.nd2	8.09	4.06	7	0	0	0			0.865266	1.04568	59.9131
171	E13V2TmIntermed_dapi_khg_mtmg_fz6_010.nd2	12.39	12.02	3	0	0	0			0.242131	0.244561	14.0123
172	E13V2TmIntermed_dapi_khg_mtmg_fz6_010.nd2	7.49	7.49	0	0	0	0			0	0	0
173	E13V2TmIntermed_dapi_khg_mtmg_fz6_010.nd2	9.03	9.01	0.5	0	0	0			0.055371	0.0553993	3.17415
174	E13V2TmIntermed_dapi_khg_mtmg_fz6_010.nd2	9.21	9.15	1	0	0	0			0.108578	0.108792	6.23333
175	E13V2TmIntermed_dapi_khg_mtmg_fz6_010.nd2	8.37	8.36	0.5	0	0	0			0.0597372	0.0597727	3.42473
176	E13V2TmIntermed_dapi_khg_mtmg_fz6_010.nd2	9.29	7.49	5.5	0	0	0			0.592034	0.633581	36.3015
177	E13V2TmIntermed_dapi_khg_mtmg_fz6_010.nd2	9.16	7.68	5	0	0	0			0.545852	0.577405	33.0829
178	E13V2TmIntermed_dapi_khg_mtmg_fz6_010.nd2	12.31	11.94	3	0	0	0			0.243704	0.246183	14.1053
179	E13V2TmIntermed_dapi_khg_mtmg_fz6_011.nd2	11.99	11.95	1	0	0	0			0.0834028	0.0834998	4.78419
180	E13V2TmIntermed_dapi_khg_mtmg_fz6_011.nd2	14.22	14	2.5	0	0	0			0.175809	0.176727	10.1257
181	E13V2TmIntermed_dapi_khg_mtmg_fz6_011.nd2	13.94	13.91	1	0	0	0			0.071736	0.0717977	4.1137
182	E13V2TmIntermed_dapi_khg_mtmg_fz6_012.nd2	9.5	8.37	4.5	0	0	0			0.473684	0.493469	28.2737
183	E13V2TmIntermed_dapi_khg_mtmg_fz6_012.nd2	7.66	1.54	7.5	0	0	0			0.979112	1.36605	78.2688
184	E13V2TmIntermed_dapi_khg_mtmg_fz6_012.nd2	12.65	12.56	1.5	0	0	0			0.118577	0.118857	6.80999
185	E13V2TmIntermed_dapi_khg_mtmg_fz6_012.nd2	6.8	4.6	5	0	0	0			0.735294	0.826101	47.3321
186	E13V2TmIntermed_dapi_khg_mtmg_fz6_012.nd2	8.51	8.27	2	0	0	0			0.235018	0.237237	13.5927
187	E13V2TmIntermed_dapi_khg_mtmg_fz6_013.nd2	9.29	8.13	4.5	0	0	0			0.484392	0.505668	28.9726
188	E13V2TmIntermed_dapi_khg_mtmg_fz6_013.nd2	9.88	9.23	3.5	0	0	0			0.354251	0.362113	20.7475
189	E13V2TmIntermed_dapi_khg_mtmg_fz6_013.nd2	8.36	7.34	4	0	0	0			0.478469	0.49891	28.5855
190	E13V2TmIntermed_dapi_khg_mtmg_fz6_014.nd2	7.52	7.52	0	0	0	0			0	0	0
191	E13V2TmIntermed_dapi_khg_mtmg_fz6_014.nd2	8.13	5.48	6	0	0	0			0.738007	0.830113	47.562
192	E13V2TmIntermed_dapi_khg_mtmg_fz6_015.nd2	7.88	7.82	1	0	0	0			0.126904	0.127247	7.2907
193	E13V2TmIntermed_dapi_khg_mtmg_fz6_015.nd2	8.01	7.99	0.5	0	0	0			0.062422	0.0624626	3.57884
194	E13V2TmIntermed_dapi_khg_mtmg_fz6_015.nd2	8.31	6.99	4.5	0	0	0			0.541516	0.57224	32.7869
195	E13V2TmIntermed_dapi_khg_mtmg_fz6_015.nd2	9.65	8.78	4	0	0	0			0.414508	0.427402	24.4883
196	E13V2TmIntermed_dapi_khg_mtmg_fz6_015.nd2	9.62	9.62	0	0	0	0			0	0	0
197	E13V2TmIntermed_dapi_khg_mtmg_fz6_015.nd2	6.52	4.71	4.5	0	0	0			0.690184	0.761743	43.6447
198	E13V2TmIntermed_dapi_khg_mtmg_fz6_015.nd2	11.13	10.56	3.5	0	0	0			0.314465	0.319893	18.3285

## Sheet: E14FixedAngles
Item	Source	Length xyz	Length xy	Height	ND.T	ND.Z	ND.M	Comment		sin theta	angle_radians	angle_degrees
1	e14wt_h2bgfp_survivin_ecad.1001.nd2	8.16	6.45	5	0	0	0			0.612745	0.65953	37.7883
2	e14wt_h2bgfp_survivin_ecad.1001.nd2	7.04	6.96	1	0	0	0			0.142045	0.142528	8.16623
3	e14wt_h2bgfp_survivin_ecad.1002.nd2	8.04	5.86	5.5	0	0	0			0.68408	0.753341	43.1633
4	e14wt_h2bgfp_survivin_ecad.1003.nd2	10.12	6.2	8	0	0	0			0.790514	0.911648	52.2336
5	e14wt_h2bgfp_survivin_ecad.1003.nd2	8.56	8.56	0	0	0	0			0	0	0
6	e14wt_h2bgfp_survivin_ecad.1003.nd2	7.45	6.28	4	0	0	0			0.536913	0.566773	32.4737
7	e14wt_h2bgfp_survivin_ecad.1003.nd2	9.99	9.53	3	0	0	0			0.3003	0.305007	17.4756
8	e14wt_h2bgfp_survivin_ecad.1004.nd2	11.21	11.2	0.5	0	0	0			0.044603	0.0446178	2.55641
9	e14wt_h2bgfp_survivin_ecad.1004.nd2	6.18	2.82	5.5	0	0	0			0.889968	1.09727	62.8692
10	e14wt_h2bgfp_survivin_ecad.1004.nd2	7.54	3.83	6.5	0	0	0			0.862069	1.03934	59.5497
11	e14wt_h2bgfp_survivin_ecad.1004.nd2	8.02	8.02	0	0	0	0			0	0	0
12	e14wt_h2bgfp_survivin_ecad.1005.nd2	10.98	10.93	1	0	0	0			0.0910747	0.0912011	5.22544
13	e14wt_h2bgfp_survivin_ecad.1005.nd2	10.67	10.08	3.5	0	0	0			0.328022	0.334209	19.1488
14	e14wt_h2bgfp_survivin_ecad.1006.nd2	7.52	7.25	2	0	0	0			0.265957	0.269197	15.4239
15	e14wt_h2bgfp_survivin_ecad.1007.nd2	7.21	7.14	1	0	0	0			0.138696	0.139145	7.97241
16	e14wt_h2bgfp_survivin_ecad.1007.nd2	7.2	7.13	1	0	0	0			0.138889	0.139339	7.98356
17	e14wt_h2bgfp_survivin_ecad.1008.nd2	9.08	6.82	6	0	0	0			0.660793	0.721875	41.3604
18	e14wt_h2bgfp_survivin_ecad.1008.nd2	9.6	9.59	0.5	0	0	0			0.0520833	0.0521069	2.98551
19	e14wt_h2bgfp_survivin_ecad.1008.nd2	6.92	3.44	6	0	0	0			0.867052	1.04925	60.1179
20	e14wt_h2bgfp_survivin_ecad.1009.nd2	9.7	8.84	4	0	0	0			0.412371	0.425055	24.3539
21	e14wt_h2bgfp_survivin_ecad.1009.nd2	8.42	8.36	1	0	0	0			0.118765	0.119046	6.82082
22	e14wt_h2bgfp_survivin_ecad.1009.nd2	9.7	9.58	1.5	0	0	0			0.154639	0.155262	8.89587
23	e14wt_h2bgfp_survivin_ecad.1009.nd2	9.97	9.51	3	0	0	0			0.300903	0.305639	17.5118
24	e14wt_h2bgfp_survivin_ecad.1011.nd2	6.85	6.85	0	0	0	0			0	0	0
25	e14wt_h2bgfp_survivin_ecad.1012.nd2	5.91	5.91	0	0	0	0			0	0	0
26	e14wt_h2bgfp_survivin_ecad.1012.nd2	6.87	2.23	6.5	0	0	0			0.946143	1.24111	71.1101
27	e14wt_h2bgfp_survivin_ecad.1014.nd2	7.84	7.78	1	0	0	0			0.127551	0.127899	7.3281
28	e14wt_h2bgfp_survivin_ecad.1014.nd2	8.18	8.12	1	0	0	0			0.122249	0.122556	7.02194
29	e14wt_h2bgfp_survivin_ecad.1014.nd2	9.7	9.49	2	0	0	0			0.206186	0.207675	11.8989
30	e14wt_h2bgfp_survivin_ecad.1015.nd2	8.8	6.44	6	0	0	0			0.681818	0.750245	42.9859
31	e14wt_h2bgfp_survivin_ecad.1016.nd2	10.85	10.43	3	0	0	0			0.276498	0.280148	16.0513
32	e14wt_h2bgfp_survivin_ecad.1016.nd2	7.4	5.88	4.5	0	0	0			0.608108	0.653675	37.4528
33	e14wt_h2bgfp_survivin_ecad.1016.nd2	6.88	6.41	2.5	0	0	0			0.363372	0.371885	21.3074
34	e14wt_h2bgfp_survivin_ecad.1016.nd2	7.11	6.82	2	0	0	0			0.281294	0.285142	16.3374
35	e14wt_h2bgfp_survivin_ecad.1016.nd2	7.73	6.62	4	0	0	0			0.517464	0.543885	31.1623
36	e14wt_h2bgfp_survivin_ecad.1016.nd2	6.78	3.15	6	0	0	0			0.884956	1.0864	62.2461
37	e14wt_h2bgfp_survivin_ecad.1017.nd2	6.88	5.2	4.5	0	0	0			0.65407	0.712952	40.8492
38	e14wt_h2bgfp_survivin_ecad.1018.nd2	6.4	4.99	4	0	0	0			0.625	0.675132	38.6822
39	e14wt_h2bgfp_survivin_ecad.1018.nd2	7.96	3.78	7	0	0	0			0.879397	1.07459	61.5697
40	e14wt_h2bgfp_survivin_ecad.1019.nd2	7.51	5.12	5.5	0	0	0			0.732357	0.821777	47.0843
41	e14wt_h2bgfp_survivin_ecad.1019.nd2	7.05	7.03	0.5	0	0	0			0.070922	0.0709816	4.06694
42	e14wt_h2bgfp_survivin_ecad.1019.nd2	10.25	10.05	2	0	0	0			0.195122	0.196382	11.2518
43	e14wt_h2bgfp_survivin_ecad.1020.nd2	6.66	4.4	5	0	0	0			0.750751	0.849198	48.6555
44	e14wt_h2bgfp_survivin_ecad.1020.nd2	6.16	6.16	0	0	0	0			0	0	0
45	e14WT_h2bgfp_celsr1_survivin.1001.nd2	10	8.66	5	0	0	0			0.5	0.523599	30
46	e14WT_h2bgfp_celsr1_survivin.1001.nd2	11.32	10.92	3	0	0	0			0.265018	0.268222	15.368
47	e14WT_h2bgfp_celsr1_survivin.1001.nd2	10.14	9.31	4	0	0	0			0.394477	0.405499	23.2334
48	e14WT_h2bgfp_celsr1_survivin.1001.nd2	8.68	8.45	2	0	0	0			0.230415	0.232504	13.3215
49	e14WT_h2bgfp_celsr1_survivin.1001.nd2	11.09	11.09	0	0	0	0			0	0	0
50	e14WT_h2bgfp_celsr1_survivin.1001.nd2	9.31	9.3	0.5	0	0	0			0.0537057	0.0537315	3.07859
51	e14WT_h2bgfp_celsr1_survivin.1001.nd2	9.77	9.77	0	0	0	0			0	0	0
52	e14WT_h2bgfp_celsr1_survivin.1001.nd2	9.13	9.11	0.5	0	0	0			0.0547645	0.0547919	3.13935
53	e14WT_h2bgfp_celsr1_survivin.1001.nd2	12.07	11.9	2	0	0	0			0.1657	0.166468	9.53791
54	e14WT_h2bgfp_celsr1_survivin.1002.nd2	13.7	4.32	13	0	0	0			0.948905	1.24975	71.6053
55	e14WT_h2bgfp_celsr1_survivin.1002.nd2	9.69	1.9	9.5	0	0	0			0.980392	1.37244	78.6351
56	e14WT_h2bgfp_celsr1_survivin.1002.nd2	11.02	8.51	7	0	0	0			0.635209	0.688279	39.4355
57	e14WT_h2bgfp_celsr1_survivin.1003.nd2	10	9.99	0.5	0	0	0			0.05	0.0500209	2.86598
58	e14WT_h2bgfp_celsr1_survivin.1003.nd2	13.23	13.19	1	0	0	0			0.0755858	0.0756579	4.33488
59	e14WT_h2bgfp_celsr1_survivin.1003.nd2	11.25	11.25	0	0	0	0			0	0	0
60	e14WT_h2bgfp_celsr1_survivin.1003.nd2	10.06	8.43	5.5	0	0	0			0.54672	0.578442	33.1423
61	e14WT_h2bgfp_celsr1_survivin.1003.nd2	7.53	7.11	2.5	0	0	0			0.332005	0.338429	19.3905
62	e14WT_h2bgfp_celsr1_survivin.1003.nd2	11.79	10.43	5.5	0	0	0			0.466497	0.485326	27.8072
63	e14WT_h2bgfp_celsr1_survivin.1003.nd2	10.16	8.84	5	0	0	0			0.492126	0.51453	29.4804
64	e14WT_h2bgfp_celsr1_survivin.1003.nd2	9.17	7.99	4.5	0	0	0			0.490731	0.512928	29.3886
65	e14WT_h2bgfp_celsr1_survivin.1004.nd2	9.77	9.3	3	0	0	0			0.307062	0.312105	17.8823
66	e14WT_h2bgfp_celsr1_survivin.1004.nd2	6.27	6.19	1	0	0	0			0.15949	0.160174	9.17727
67	e14WT_h2bgfp_celsr1_survivin.1004.nd2	8.48	8.34	1.5	0	0	0			0.176887	0.177822	10.1885
68	e14WT_h2bgfp_celsr1_survivin.1004.nd2	8.86	7.31	5	0	0	0			0.564334	0.599626	34.3561
69	e14WT_h2bgfp_celsr1_survivin.1004.nd2	9.95	9.11	4	0	0	0			0.40201	0.413711	23.7039
70	e14WT_h2bgfp_celsr1_survivin.1005.nd2	9.8	9.75	1	0	0	0			0.102041	0.102219	5.8567
71	e14WT_h2bgfp_celsr1_survivin.1005.nd2	9.89	9.78	1.5	0	0	0			0.151668	0.152256	8.72362
72	e14WT_h2bgfp_celsr1_survivin.1006.nd2	8.16	8.02	1.5	0	0	0			0.183824	0.184875	10.5925
73	e14WT_h2bgfp_celsr1_survivin.1006.nd2	13.2	13.17	1	0	0	0			0.0757576	0.0758302	4.34475
74	e14WT_h2bgfp_celsr1_survivin.1006.nd2	7.22	7.2	0.5	0	0	0			0.0692521	0.0693076	3.97103
75	e14WT_h2bgfp_celsr1_survivin.1007.nd2	8.75	8.39	2.5	0	0	0			0.285714	0.289752	16.6015
76	e14WT_h2bgfp_celsr1_survivin.1007.nd2	9.58	9.46	1.5	0	0	0			0.156576	0.157223	9.00822
77	e14WT_h2bgfp_celsr1_survivin.1007.nd2	10.12	9.92	2	0	0	0			0.197628	0.198938	11.3983
78	e14WT_h2bgfp_celsr1_survivin.1007.nd2	8.19	8.13	1	0	0	0			0.1221	0.122406	7.01332
79	e14WT_h2bgfp_celsr1_survivin.1007.nd2	11.12	11.12	0	0	0	0			0	0	0
80	e14WT_h2bgfp_celsr1_survivin.1007.nd2	10.45	10.01	3	0	0	0			0.287081	0.291179	16.6833
81	e14WT_h2bgfp_celsr1_survivin.1007.nd2	9.6	8.73	4	0	0	0			0.416667	0.429775	24.6243
82	e14WT_h2bgfp_celsr1_survivin.1007.nd2	5.44	3.68	4	0	0	0			0.735294	0.826101	47.3321
83	e14WT_h2bgfp_celsr1_survivin.1008.nd2	8.84	8.47	2.5	0	0	0			0.282805	0.286718	16.4277
84	e14WT_h2bgfp_celsr1_survivin.1008.nd2	7.49	7.06	2.5	0	0	0			0.333778	0.340309	19.4983
85	e14WT_h2bgfp_celsr1_survivin.1008.nd2	7.39	6.76	3	0	0	0			0.405954	0.418022	23.9509
86	e14WT_h2bgfp_celsr1_survivin.1008.nd2	11.74	9.03	7.5	0	0	0			0.638842	0.692992	39.7055
87	e14WT_h2bgfp_celsr1_survivin.1008.nd2	11.64	3.79	11	0	0	0			0.945017	1.23765	70.912
88	e14WT_h2bgfp_celsr1_survivin.1009.nd2	7.92	7.78	1.5	0	0	0			0.189394	0.190545	10.9174
89	e14WT_h2bgfp_celsr1_survivin.1009.nd2	8.79	8.74	1	0	0	0			0.113766	0.114012	6.53243
90	e14WT_h2bgfp_celsr1_survivin.1009.nd2	6.81	6.79	0.5	0	0	0			0.0734214	0.0734876	4.21053
91	e14WT_h2bgfp_celsr1_survivin.1009.nd2	7.65	6.81	3.5	0	0	0			0.457516	0.4752	27.227
92	e14WT_h2bgfp_celsr1_survivin.1010.nd2	8.42	8.18	2	0	0	0			0.23753	0.239822	13.7408
93	e14WT_h2bgfp_celsr1_survivin.1010.nd2	11.08	11.08	0	0	0	0			0	0	0
94	e14WT_h2bgfp_celsr1_survivin.1010.nd2	8.34	7.57	3.5	0	0	0			0.419664	0.433075	24.8134
95	e14WT_h2bgfp_celsr1_survivin.1010.nd2	12.26	12.22	1	0	0	0			0.0815661	0.0816568	4.67859
96	e14WT_h2bgfp_celsr1_survivin.1010.nd2	13.4	12.22	5.5	0	0	0			0.410448	0.422945	24.233
97	e14WT_h2bgfp_celsr1_survivin.1010.nd2	8.09	7.03	4	0	0	0			0.494438	0.517188	29.6327
98	e14WT_h2bgfp_celsr1_survivin.1010.nd2	9	7.12	5.5	0	0	0			0.611111	0.657464	37.6699
99	e14WT_h2bgfp_celsr1_survivin.1011.nd2	10.14	9.08	4.5	0	0	0			0.443787	0.45982	26.3458
100	e14WT_h2bgfp_celsr1_survivin.1011.nd2	7.6	5.72	5	0	0	0			0.657895	0.71802	41.1395
101	e14WT_h2bgfp_celsr1_survivin.1011.nd2	9.52	6.45	7	0	0	0			0.735294	0.826101	47.3321
102	e14WT_h2bgfp_celsr1_survivin.1011.nd2	8.29	2.17	8	0	0	0			0.965018	1.30551	74.8003
103	e14WT_h2bgfp_celsr1_survivin.1011.nd2	10.75	7.7	7.5	0	0	0			0.697674	0.772146	44.2407
104	e14WT_h2bgfp_celsr1_survivin.1012.nd2	6.85	6.85	0	0	0	0			0	0	0
105	e14WT_h2bgfp_celsr1_survivin.1012.nd2	11.28	10.88	3	0	0	0			0.265957	0.269197	15.4239
106	e14WT_h2bgfp_celsr1_survivin.1012.nd2	8.55	8	3	0	0	0			0.350877	0.358508	20.541
107	e14WT_h2bgfp_celsr1_survivin.1012.nd2	10.25	9.43	4	0	0	0			0.390244	0.400896	22.9697
108	e14WT_h2bgfp_celsr1_survivin.1012.nd2	8.9	7	5.5	0	0	0			0.617978	0.666168	38.1686
109	e14WT_h2bgfp_celsr1_survivin.1012.nd2	8.31	7.54	3.5	0	0	0			0.421179	0.434745	24.9091
110	e14WT_h2bgfp_celsr1_survivin.1012.nd2	7.6	1.24	7.5	0	0	0			0.986842	1.4084	80.6952
111	e14WT_h2bgfp_celsr1_survivin.1012.nd2	9.06	5.08	7.5	0	0	0			0.827815	0.975201	55.8749
112	e14WT_h2bgfp_celsr1_survivin.1012.nd2	8	4.66	6.5	0	0	0			0.8125	0.948428	54.3409
113	e14WT_h2bgfp_celsr1_survivin.1013.nd2	8.84	8.84	0	0	0	0			0	0	0
114	e14WT_h2bgfp_celsr1_survivin.1013.nd2	10.35	7.14	7.5	0	0	0			0.724638	0.810508	46.4387
115	e14WT_h2bgfp_celsr1_survivin.1013.nd2	9.51	8.38	4.5	0	0	0			0.473186	0.492904	28.2413
116	e14WT_h2bgfp_celsr1_survivin.1013.nd2	10.82	9.59	5	0	0	0			0.462107	0.48037	27.5232
117	e14WT_h2bgfp_celsr1_survivin.1013.nd2	9.27	4.69	8	0	0	0			0.862999	1.04118	59.655
118	e14WT_h2bgfp_celsr1_survivin.1013.nd2	9.48	2.97	9	0	0	0			0.949367	1.25122	71.6893
119	e14WT_h2bgfp_celsr1_survivin.1013.nd2	9.43	6.83	6.5	0	0	0			0.68929	0.760508	43.5739
120	e14WT_h2bgfp_celsr1_survivin.1013.nd2	9.71	3.65	9	0	0	0			0.92688	1.18601	67.9535
121	e14WT_h2bgfp_celsr1_survivin.1014.nd2	7.62	7.19	2.5	0	0	0			0.328084	0.334275	19.1525
122	e14WT_h2bgfp_celsr1_survivin.1014.nd2	11.88	11.49	3	0	0	0			0.252525	0.255289	14.627
123	e14WT_h2bgfp_celsr1_survivin.1014.nd2	13.41	13.37	1	0	0	0			0.0745712	0.0746405	4.27659
124	e14WT_h2bgfp_celsr1_survivin.1014.nd2	14.64	14.56	1.5	0	0	0			0.102459	0.102639	5.88079
125	e14WT_h2bgfp_celsr1_survivin.1015.nd2	8.81	8.08	3.5	0	0	0			0.397276	0.408546	23.408
126	e14WT_h2bgfp_celsr1_survivin.1016.nd2	10.54	8.67	6	0	0	0			0.56926	0.605605	34.6986
127	e14WT_h2bgfp_celsr1_survivin.1016.nd2	8.05	2.93	7.5	0	0	0			0.931677	1.199	68.6978
128	e14WT_h2bgfp_celsr1_survivin.1017.nd2	9.94	9.89	1	0	0	0			0.100604	0.100774	5.77393
129	e14WT_h2bgfp_celsr1_survivin.1017.nd2	10.36	9.75	3.5	0	0	0			0.337838	0.344619	19.7452
130	e14WT_h2bgfp_celsr1_survivin.1017.nd2	5.82	4.22	4	0	0	0			0.687285	0.757745	43.4156
131	e14WT_h2bgfp_celsr1_survivin.1017.nd2	10.57	10.14	3	0	0	0			0.283822	0.287778	16.4885
132	e14WT_h2bgfp_celsr1_survivin.1018.nd2	10.05	9.22	4	0	0	0			0.39801	0.409347	23.4538
133	e14WT_h2bgfp_celsr1_survivin.1018.nd2	9.18	4.49	8	0	0	0			0.87146	1.05817	60.6287
134	e14WT_h2bgfp_celsr1_survivin.1018.nd2	9.47	5.06	8	0	0	0			0.844773	1.00614	57.6476
135	e14WT_h2bgfp_celsr1_survivin.1019.nd2	7.8	7.2	3	0	0	0			0.384615	0.394791	22.6199
136	e14WT_h2bgfp_celsr1_survivin.1019.nd2	10.39	10.28	1.5	0	0	0			0.14437	0.144876	8.30078
137	e14WT_h2bgfp_celsr1_survivin.1019.nd2	10.84	10.84	0	0	0	0			0	0	0
138	e14WT_h2bgfp_celsr1_survivin.1020.nd2	9.24	8.33	4	0	0	0			0.4329	0.447708	25.6518
139	e14WT_h2bgfp_celsr1_survivin.1020.nd2	8.85	8.8	1	0	0	0			0.112994	0.113236	6.48796
140	e14WT_h2bgfp_celsr1_survivin.1020.nd2	8.36	8.3	1	0	0	0			0.119617	0.119904	6.87001
141	e14WT_h2bgfp_celsr1_survivin.1020.nd2	8.26	8.26	0	0	0	0			0	0	0
142	e14WT_h2bgfp_celsr1_survivin.1020.nd2	8.14	8	1.5	0	0	0			0.184275	0.185334	10.6189
143	e14WT_h2bgfp_celsr1_survivin.1021.nd2	8.57	8.55	0.5	0	0	0			0.0583431	0.0583762	3.34471
144	e14WT_h2bgfp_celsr1_survivin.1021.nd2	8.67	8.65	0.5	0	0	0			0.0576701	0.0577021	3.30609
145	e14WT_h2bgfp_celsr1_survivin.1021.nd2	11.29	10.56	4	0	0	0			0.354296	0.362161	20.7503
146	e14WT_h2bgfp_celsr1_survivin.1022.nd2	10.55	10.54	0.5	0	0	0			0.0473934	0.0474111	2.71646
147	e14WT_h2bgfp_celsr1_survivin.1022.nd2	11.04	11.03	0.5	0	0	0			0.0452899	0.0453054	2.59581
148	e14WT_h2bgfp_celsr1_survivin.1022.nd2	7.38	7.31	1	0	0	0			0.135501	0.135919	7.78761
149	e14WT_h2bgfp_celsr1_survivin.1023.nd2	7.91	7.84	1	0	0	0			0.126422	0.126761	7.2629
150	e14WT_h2bgfp_celsr1_survivin.1023.nd2	8.7	8.64	1	0	0	0			0.114943	0.115197	6.60031
151	e14WT_h2bgfp_celsr1_survivin.1024.nd2	9.41	9.29	1.5	0	0	0			0.159405	0.160088	9.17236
152	e14WT_h2bgfp_celsr1_survivin.1024.nd2	12.39	12.39	0	0	0	0			0	0	0
153	e14WT_h2bgfp_celsr1_survivin.1024.nd2	12.45	11.95	3.5	0	0	0			0.281124	0.284966	16.3273
154	e14WT_h2bgfp_celsr1_survivin.1025.nd2	11.99	11.99	0	0	0	0			0	0	0
155	e14WT_h2bgfp_celsr1_survivin.1025.nd2	8.56	8.55	0.5	0	0	0			0.0584112	0.0584445	3.34862
156	e14WT_h2bgfp_celsr1_survivin.1025.nd2	10.61	10.59	0.5	0	0	0			0.0471254	0.0471428	2.70108
157	e14WT_h2bgfp_celsr1_survivin.1025.nd2	8.27	6.94	4.5	0	0	0			0.544135	0.575358	32.9656
158	e14WT_h2bgfp_celsr1_survivin.1026.nd2	8.37	8.13	2	0	0	0			0.238949	0.241283	13.8245
159	e14WT_h2bgfp_celsr1_survivin.1026.nd2	9.76	9.75	0.5	0	0	0			0.0512295	0.0512519	2.93652
160	e14WT_h2bgfp_celsr1_survivin.1026.nd2	12.62	12.58	1	0	0	0			0.0792393	0.0793225	4.54484
161	e14WT_h2bgfp_celsr1_survivin.1026.nd2	9.79	9.68	1.5	0	0	0			0.153218	0.153823	8.81344
162	e14WT_h2bgfp_celsr1_survivin.1026.nd2	10.18	9.56	3.5	0	0	0			0.343811	0.350973	20.1093
163	e14WT_h2bgfp_celsr1_survivin.1026.nd2	11.82	11.72	1.5	0	0	0			0.126904	0.127247	7.2907
164	e14WT_h2bgfp_celsr1_survivin.1026.nd2	11.01	10.04	4.5	0	0	0			0.408719	0.42105	24.1244
Item	Source	Length xyz	Length xy	Height	ND.T	ND.Z	ND.M	Comment		sin theta	angle_radians	angle_degrees
1	e14Lp_h2bgfp_survivin_ecad.1001.nd2	6.53	4.73	4.5	0	0	0			0.689127	0.760284	43.5611
2	e14Lp_h2bgfp_survivin_ecad.1001.nd2	11.63	8.88	7.5	0	0	0			0.644884	0.700871	40.157
3	e14Lp_h2bgfp_survivin_ecad.1001.nd2	9.05	7.18	5.5	0	0	0			0.607735	0.653205	37.4259
4	e14Lp_h2bgfp_survivin_ecad.1001.nd2	11.23	10.5	4	0	0	0			0.356189	0.364186	20.8663
5	e14Lp_h2bgfp_survivin_ecad.1002.nd2	8.46	2.76	8	0	0	0			0.945626	1.23952	71.019
6	e14Lp_h2bgfp_survivin_ecad.1002.nd2	9.55	4.35	8.5	0	0	0			0.890052	1.09746	62.8798
7	e14Lp_h2bgfp_survivin_ecad.1002.nd2	6.26	1.79	6	0	0	0			0.958466	1.28158	73.4289
8	e14Lp_h2bgfp_survivin_ecad.1002.nd2	9.8	3.88	9	0	0	0			0.918367	1.16393	66.6886
9	e14Lp_h2bgfp_survivin_ecad.1002.nd2	9.09	4.32	8	0	0	0			0.880088	1.07605	61.653
10	e14Lp_h2bgfp_survivin_ecad.1002.nd2	9.68	8.81	4	0	0	0			0.413223	0.425991	24.4075
11	e14Lp_h2bgfp_survivin_ecad.1002.nd2	7.64	7.02	3	0	0	0			0.39267	0.403533	23.1207
12	e14Lp_h2bgfp_survivin_ecad.1003.nd2	10.92	6.86	8.5	0	0	0			0.778388	0.892094	51.1132
13	e14Lp_h2bgfp_survivin_ecad.1003.nd2	10.93	10.89	1	0	0	0			0.0914913	0.0916194	5.24941
14	e14Lp_h2bgfp_survivin_ecad.1003.nd2	6.99	4.32	5.5	0	0	0			0.786838	0.905669	51.891
15	e14Lp_h2bgfp_survivin_ecad.1003.nd2	7.97	5.24	6	0	0	0			0.752823	0.852341	48.8355
16	e14Lp_h2bgfp_survivin_ecad.1004.nd2	10.35	8.77	5.5	0	0	0			0.531401	0.560254	32.1002
17	e14Lp_h2bgfp_survivin_ecad.1005.nd2	9.28	7.47	5.5	0	0	0			0.592672	0.634373	36.3469
18	e14Lp_h2bgfp_survivin_ecad.1006.nd2	6.17	1.45	6	0	0	0			0.972447	1.33551	76.519
19	e14Lp_h2bgfp_survivin_ecad.1006.nd2	8.52	7.53	4	0	0	0			0.469484	0.488706	28.0008
20	e14Lp_h2bgfp_survivin_ecad.1006.nd2	9.52	8.39	4.5	0	0	0			0.472689	0.49234	28.209
21	e14Lp_h2bgfp_survivin_ecad.1007.nd2	12.64	10.52	7	0	0	0			0.553797	0.586918	33.6279
22	e14Lp_h2bgfp_survivin_ecad.1008.nd2	9.07	5.09	7.5	0	0	0			0.826902	0.973576	55.7818
23	e14Lp_h2bgfp_survivin_ecad.1008.nd2	10.33	10.33	0	0	0	0			0	0	0
24	e14Lp_h2bgfp_survivin_ecad.1008.nd2	11.11	9.92	5	0	0	0			0.450045	0.466816	26.7466
25	e14Lp_h2bgfp_survivin_ecad.1009.nd2	8.12	7.73	2.5	0	0	0			0.307882	0.312966	17.9316
26	e14Lp_h2bgfp_survivin_ecad.1009.nd2	10.15	1.71	10	0	0	0			0.985222	1.39866	80.1375
27	e14Lp_h2bgfp_survivin_ecad.1009.nd2	9.88	9.88	0	0	0	0			0	0	0
28	e14Lp_h2bgfp_survivin_ecad.1010.nd2	11.48	11.31	2	0	0	0			0.174216	0.17511	10.033
29	e14Lp_h2bgfp_survivin_ecad.1010.nd2	5.64	2.62	5	0	0	0			0.886525	1.08978	62.4398
30	e14Lp_h2bgfp_survivin_ecad.1010.nd2	9.44	5.01	8	0	0	0			0.847458	1.01118	57.9362
31	e14Lp_h2bgfp_survivin_ecad.1010.nd2	8.66	7.39	4.5	0	0	0			0.51963	0.546418	31.3075
32	e14Lp_h2bgfp_survivin_ecad.1010.nd2	5.89	5.86	0.5	0	0	0			0.0848896	0.0849919	4.86968
33	e14Lp_h2bgfp_survivin_ecad.1011.nd2	10.75	3.94	10	0	0	0			0.930233	1.19505	68.4711
34	e14Lp_h2bgfp_survivin_ecad.1011.nd2	10.03	8.39	5.5	0	0	0			0.548355	0.580396	33.2542
35	e14Lp_h2bgfp_survivin_ecad.1011.nd2	9.74	7.67	6	0	0	0			0.616016	0.663676	38.0258
36	e14Lp_h2bgfp_survivin_ecad.1011.nd2	10.05	6.08	8	0	0	0			0.79602	0.920691	52.7517
37	e14Lp_h2bgfp_survivin_ecad.1011.nd2	8.69	8.32	2.5	0	0	0			0.287687	0.291811	16.7195
38	e14Lp_h2bgfp_survivin_ecad.1012.nd2	10.13	6.22	8	0	0	0			0.789733	0.910374	52.1606
39	e14Lp_h2bgfp_survivin_ecad.1012.nd2	6.64	1.36	6.5	0	0	0			0.978916	1.36508	78.2135
40	e14Lp_h2bgfp_survivin_ecad.1012.nd2	6.35	2.08	6	0	0	0			0.944882	1.23723	70.8883
41	e14Lp_h2bgfp_survivin_ecad.1012.nd2	9.7	1.95	9.5	0	0	0			0.979381	1.36738	78.3449
42	e14Lp_h2bgfp_survivin_ecad.1012.nd2	9.47	7.72	5.5	0	0	0			0.580781	0.619688	35.5055
43	e14Lp_h2bgfp_survivin_ecad.1012.nd2	8.63	6.2	6	0	0	0			0.695249	0.768766	44.0471
44	e14Lp_h2bgfp_survivin_ecad.1012.nd2	9.36	7.19	6	0	0	0			0.641026	0.695834	39.8683
45	e14Lp_h2bgfp_survivin_ecad.1014.nd2	6.91	5.63	4	0	0	0			0.578871	0.617344	35.3712
46	e14Lp_h2bgfp_survivin_ecad.1014.nd2	7.33	6.14	4	0	0	0			0.545703	0.577227	33.0727
47	e14Lp_h2bgfp_survivin_ecad.1014.nd2	8.15	8.01	1.5	0	0	0			0.184049	0.185104	10.6057
48	e14Lp_h2bgfp_survivin_ecad.1014.nd2	7.12	5.07	5	0	0	0			0.702247	0.778549	44.6076
49	e14Lp_h2bgfp_survivin_ecad.1014.nd2	8.56	7.81	3.5	0	0	0			0.408879	0.421225	24.1344
50	e14Lp_h2bgfp_survivin_ecad.1015.nd2	9.57	7.45	6	0	0	0			0.626959	0.677644	38.8261
51	e14Lp_h2bgfp_survivin_ecad.1015.nd2	6.74	6.44	2	0	0	0			0.296736	0.301273	17.2617
52	e14Lp_h2bgfp_survivin_ecad.1015.nd2	5.97	2.33	5.5	0	0	0			0.921273	1.17134	67.1129
53	e14Lp_h2bgfp_survivin_ecad.1015.nd2	10.06	9.23	4	0	0	0			0.397614	0.408915	23.4291
54	e14Lp_h2bgfp_survivin_ecad.1016.nd2	10.12	8.8	5	0	0	0			0.494071	0.516766	29.6085
55	e14Lp_h2bgfp_survivin_ecad.1016.nd2	5.75	1.69	5.5	0	0	0			0.956522	1.27483	73.0426
56	e14Lp_h2bgfp_survivin_ecad.1016.nd2	6.42	4.02	5	0	0	0			0.778816	0.892776	51.1523
57	e14Lp_h2bgfp_survivin_ecad.1017.nd2	6.51	6.51	0	0	0	0			0	0	0
58	e14Lp_h2bgfp_survivin_ecad.1017.nd2	10.19	9.15	4.5	0	0	0			0.441609	0.457392	26.2066
59	e14Lp_h2bgfp_survivin_ecad.1017.nd2	7.73	7.71	0.5	0	0	0			0.0646831	0.0647282	3.70866
60	e14Lp_h2bgfp_survivin_ecad.1018.nd2	7.16	7.09	1	0	0	0			0.139665	0.140123	8.02845
61	e14Lp_h2bgfp_survivin_ecad.1019.nd2	9.84	9.2	3.5	0	0	0			0.355691	0.363653	20.8358
62	e14Lp_h2bgfp_survivin_ecad.1019.nd2	8.44	2.68	8	0	0	0			0.947867	1.24648	71.4178
63	e14Lp_h2bgfp_survivin_ecad.1019.nd2	10.57	10.52	1	0	0	0			0.0946074	0.0947491	5.42872
64	e14Lp_h2bgfp_survivin_ecad.1019.nd2	7.67	7.05	3	0	0	0			0.391134	0.401864	23.0251
65	e14Lp_h2bgfp_survivin_ecad.1020.nd2	9.37	7.2	6	0	0	0			0.640342	0.694943	39.8173
66	e14Lp_h2bgfp_survivin_ecad.1020.nd2	9.93	8.59	5	0	0	0			0.503525	0.527674	30.2335
67	e14Lp_h2bgfp_survivin_ecad.1021.nd2	9.61	9.61	0	0	0	0			0	0	0
68	e14Lp_h2bgfp_survivin_ecad.1021.nd2	8.82	7.26	5	0	0	0			0.566893	0.60273	34.5339
69	e14Lp_h2bgfp_survivin_ecad.1021.nd2	7.08	5.01	5	0	0	0			0.706215	0.784137	44.9278
70	e14Lp_h2bgfp_survivin_ecad.1022.nd2	8.23	8.1	1.5	0	0	0			0.18226	0.183284	10.5014
71	e14Lp_h2bgfp_survivin_ecad.1022.nd2	6.25	5.49	3	0	0	0			0.48	0.500655	28.6854
72	e14Lp_h2bgfp_survivin_ecad.1022.nd2	7.41	4.35	6	0	0	0			0.809717	0.943669	54.0683
73	e14Lp_h2bgfp_survivin_ecad.1022.nd2	7.44	6.28	4	0	0	0			0.537634	0.567629	32.5227
74	e14Lp_h2bgfp_survivin_ecad.1022.nd2	9.98	3.05	9.5	0	0	0			0.951904	1.25939	72.1578
75	e14Lp_h2bgfp_survivin_ecad.1023.nd2	11.39	6.98	9	0	0	0			0.790167	0.911081	52.2011
76	e14Lp_h2bgfp_survivin_ecad.1023.nd2	8.56	8.5	1	0	0	0			0.116822	0.11709	6.70875
77	e14Lp_h2bgfp_survivin_ecad.1023.nd2	9.68	9.68	0	0	0	0			0	0	0
78	e14Lp_h2bgfp_survivin_ecad.1024.nd2	8.43	8.19	2	0	0	0			0.237248	0.239532	13.7242
79	e14Lp_h2bgfp_survivin_ecad.1024.nd2	10.2	3.7	9.5	0	0	0			0.931373	1.19816	68.6498
80	e14Lp_h2bgfp_survivin_ecad.1024.nd2	9.09	5.81	7	0	0	0			0.770077	0.878962	50.3608
81	e14Lp_h2bgfp_survivin_ecad.1025.nd2	8.32	4.49	7	0	0	0			0.841346	0.999769	57.2825
82	e14Lp_h2bgfp_survivin_ecad.1026.nd2	8.16	7.11	4	0	0	0			0.490196	0.512315	29.3535
83	e14Lp_h2bgfp_survivin_ecad.1026.nd2	9.39	3.98	8.5	0	0	0			0.905218	1.13189	64.8527
84	e14Lp_h2bgfp_survivin_ecad.1026.nd2	8.26	3.46	7.5	0	0	0			0.90799	1.13846	65.2291
85	e14Lp_h2bgfp_survivin_ecad.1027.nd2	7.68	6.22	4.5	0	0	0			0.585938	0.626036	35.8692
86	e14Lp_h2bgfp_survivin_ecad.1027.nd2	10.77	6.61	8.5	0	0	0			0.789229	0.909553	52.1136
87	e14Lp_h2bgfp_survivin_ecad.1028.nd2	8.75	7.18	5	0	0	0			0.571429	0.608246	34.8499
88	e14Lp_h2bgfp_survivin_ecad.1028.nd2	7.18	6.9	2	0	0	0			0.278552	0.282286	16.1738
89	e14Lp_h2bgfp_survivin_ecad.1028.nd2	8.56	7.81	3.5	0	0	0			0.408879	0.421225	24.1344
90	e14Lp_h2bgfp_survivin_ecad.1028.nd2	8.38	3.74	7.5	0	0	0			0.894988	1.1084	63.5069
91	e14Lp_h2bgfp_survivin_ecad.1029.nd2	11.22	11.04	2	0	0	0			0.178253	0.179211	10.268
92	e14Lp_h2bgfp_survivin_ecad.1029.nd2	7.99	6.24	5	0	0	0			0.625782	0.676134	38.7396
93	e14Lp_h2bgfp_survivin_ecad.1029.nd2	10.7	10.6	1.5	0	0	0			0.140187	0.14065	8.05866
94	e14Lp_h2bgfp_survivin_ecad.1030.nd2	7.74	7.48	2	0	0	0			0.258398	0.261363	14.975
95	e14Lp_h2bgfp_survivin_ecad.1030.nd2	7.9	4.49	6.5	0	0	0			0.822785	0.966294	55.3645
96	e14Lp_h2bgfp_survivin_ecad.1031.nd2	9.72	4.72	8.5	0	0	0			0.874486	1.06437	60.9842
97	e14Lp_h2bgfp_survivin_ecad.1031.nd2	8.13	4.13	7	0	0	0			0.861009	1.03725	59.43
98	e14Lp_h2bgfp_survivin_ecad.1031.nd2	7.72	3.25	7	0	0	0			0.906736	1.13548	65.0581
99	e14Lp_h2bgfp_survivin_ecad.1031.nd2	6.53	4.73	4.5	0	0	0			0.689127	0.760284	43.5611
100	e14Lp_h2bgfp_survivin_ecad.1031.nd2	11.18	1.98	11	0	0	0			0.9839	1.39111	79.7047
101	e14Lp_h2bgfp_survivin_ecad.1032.nd2	10.4	7.2	7.5	0	0	0			0.721154	0.805466	46.1498
102	e14Lp_h2bgfp_survivin_ecad.1032.nd2	10.35	8.05	6.5	0	0	0			0.628019	0.679005	38.9041
103	e14Lp_h2bgfp_survivin_ecad.1032.nd2	5.49	2.27	5	0	0	0			0.910747	1.14509	65.6088
104	e14Lp_h2bgfp_survivin_ecad.1032.nd2	9.38	9.16	2	0	0	0			0.21322	0.214869	12.3111
105	e14Lp_h2bgfp_survivin_ecad.1032.nd2	12.75	12.59	2	0	0	0			0.156863	0.157513	9.02485
106	e14Lp_h2bgfp_survivin_ecad.1033.nd2	7.28	7.27	0.5	0	0	0			0.0686813	0.0687354	3.93825
107	e14Lp_h2bgfp_survivin_ecad.1033.nd2	10.45	10.4	1	0	0	0			0.0956938	0.0958404	5.49125
108	e14Lp_h2bgfp_survivin_ecad.1033.nd2	9.32	9.27	1	0	0	0			0.107296	0.107503	6.15947
109	e14Lp_h2bgfp_survivin_ecad.1033.nd2	8.72	1.93	8.5	0	0	0			0.974771	1.34569	77.1024
110	e14Lp_h2bgfp_survivin_ecad.1034.nd2	9.13	1.55	9	0	0	0			0.985761	1.40184	80.3197
111	e14Lp_h2bgfp_survivin_ecad.1034.nd2	10.57	9.32	5	0	0	0			0.473037	0.492735	28.2316
112	e14Lp_h2bgfp_survivin_ecad.1034.nd2	10.24	6.4	8	0	0	0			0.78125	0.896666	51.3752
113	e14Lp_h2bgfp_survivin_ecad.1034.nd2	9.14	7.3	5.5	0	0	0			0.601751	0.645691	36.9954
114	e14Lp_h2bgfp_survivin_ecad.1034.nd2	7.07	1	7	0	0	0			0.990099	1.42996	81.9307
115	e14Lp_h2bgfp_survivin_ecad.1034.nd2	10.18	8.23	6	0	0	0			0.589391	0.630305	36.1138
116	e14Lp_h2bgfp_survivin_ecad.1034.nd2	9.5	9.5	0	0	0	0			0	0	0
117	e14Lp_h2bgfp_survivin_ecad.1035.nd2	7.57	6.72	3.5	0	0	0			0.462351	0.480645	27.5389
118	e14Lp_h2bgfp_survivin_ecad.1035.nd2	9.83	9.5	2.5	0	0	0			0.254323	0.257148	14.7335
119	e14Lp_h2bgfp_survivin_ecad.1035.nd2	10.35	2.66	10	0	0	0			0.966184	1.30999	75.0572
120	e14Lp_h2bgfp_survivin_ecad.1035.nd2	7.67	4.77	6	0	0	0			0.782269	0.898299	51.4688
121	e14Lp_h2bgfp_survivin_ecad.1035.nd2	8.71	6.76	5.5	0	0	0			0.631458	0.683432	39.1578
122	e14Lp_h2bgfp_survivin_ecad.1036.nd2	6.67	5.34	4	0	0	0			0.5997	0.643126	36.8484
123	e14Lp_h2bgfp_survivin_ecad.1036.nd2	8.9	2.64	8.5	0	0	0			0.955056	1.26985	72.757
124	e14Lp_h2bgfp_survivin_ecad.1037.nd2	5	0	5	0	0	0			1	1.5708	90
125	e14Lp_h2bgfp_survivin_ecad.1037.nd2	8.74	3.52	8	0	0	0			0.915332	1.15633	66.2529
126	e14Lp_h2bgfp_survivin_ecad.1037.nd2	6.06	0.87	6	0	0	0			0.990099	1.42996	81.9307
127	e14Lp_h2bgfp_survivin_ecad.1037.nd2	9.31	6.66	6.5	0	0	0			0.698174	0.772844	44.2807
128	e14Lp_h2bgfp_survivin_ecad.1037.nd2	5.52	4.64	3	0	0	0			0.543478	0.574575	32.9207
129	e14Lp_h2bgfp_survivin_ecad.1037.nd2	9.03	7.52	5	0	0	0			0.55371	0.586813	33.6219
130	e14Lp_h2bgfp_survivin_ecad.1038.nd2	6.68	1.53	6.5	0	0	0			0.973054	1.33812	76.6689
131	e14Lp_h2bgfp_survivin_ecad.1038.nd2	7.2	4.65	5.5	0	0	0			0.763889	0.869318	49.8082
132	e14Lp_h2bgfp_survivin_ecad.1039.nd2	11.97	11.93	1	0	0	0			0.0835422	0.0836397	4.7922
133	e14Lp_h2bgfp_survivin_ecad.1039.nd2	7.19	7.12	1	0	0	0			0.139082	0.139534	7.99473
134	e14Lp_h2bgfp_survivin_ecad.1039.nd2	8.82	7.27	5	0	0	0			0.566893	0.60273	34.5339
135	e14Lp_h2bgfp_survivin_ecad.1039.nd2	7.21	1.71	7	0	0	0			0.970874	1.32885	76.1376
136	e14Lp_h2bgfp_survivin_ecad.1039.nd2	10.55	7.41	7.5	0	0	0			0.7109	0.790778	45.3082
137	e14Lp_h2bgfp_survivin_ecad.1039.nd2	8.77	5.89	6.5	0	0	0			0.741163	0.834801	47.8306
138	e14Lp_h2bgfp_survivin_ecad.1039.nd2	9.57	7.83	5.5	0	0	0			0.574713	0.612253	35.0795
139	e14Lp_h2bgfp_survivin_ecad.1040.nd2	10.79	10.61	2	0	0	0			0.185357	0.186435	10.6819
140	e14Lp_h2bgfp_survivin_ecad.1040.nd2	8.2	5.58	6	0	0	0			0.731707	0.820823	47.0297
141	e14Lp_h2bgfp_survivin_ecad.1040.nd2	7.42	4.98	5.5	0	0	0			0.74124	0.834916	47.8371
142	e14Lp_h2bgfp_survivin_ecad.1040.nd2	6.24	1.71	6	0	0	0			0.961538	1.29255	74.0576
143	e14Lp_h2bgfp_survivin_ecad.1041.nd2	8.38	6.72	5	0	0	0			0.596659	0.639331	36.631
144	e14Lp_h2bgfp_survivin_ecad.1041.nd2	8.86	6.94	5.5	0	0	0			0.620767	0.669721	38.3722
145	e14Lp_h2bgfp_survivin_ecad.1041.nd2	9.11	9.05	1	0	0	0			0.109769	0.109991	6.30203
146	e14Lp_h2bgfp_survivin_ecad.1041.nd2	9.4	7.24	6	0	0	0			0.638298	0.692285	39.665
147	e14Lp_h2bgfp_survivin_ecad.1042.nd2	10.33	10.22	1.5	0	0	0			0.145208	0.145723	8.34933
148	e14Lp_h2bgfp_survivin_ecad.1042.nd2	7.87	7.81	1	0	0	0			0.127065	0.127409	7.30001
149	e14Lp_h2bgfp_survivin_ecad.1042.nd2	8.86	7.91	4	0	0	0			0.451467	0.468409	26.8379
150	e14Lp_h2bgfp_survivin_ecad.1042.nd2	7.19	1.63	7	0	0	0			0.973574	1.34039	76.7989
151	e14Lp_h2bgfp_survivin_ecad.1043.nd2	6.44	5.93	2.5	0	0	0			0.388199	0.398676	22.8425
152	e14Lp_h2bgfp_survivin_ecad.1043.nd2	9.74	3.73	9	0	0	0			0.924025	1.17848	67.5217
153	e14Lp_h2bgfp_survivin_ecad.1043.nd2	10.32	7.09	7.5	0	0	0			0.726744	0.81357	46.6141
154	e14Lp_h2bgfp_survivin_ecad.1043.nd2	9.85	6.94	7	0	0	0			0.71066	0.790436	45.2886
155	e14Lp_h2bgfp_survivin_ecad.1044.nd2	9.2	6.51	6.5	0	0	0			0.706522	0.784571	44.9526
156	e14Lp_h2bgfp_survivin_ecad.1050.nd2	11.9	11.89	0.5	0	0	0			0.0420168	0.0420292	2.40809
157	e14Lp_h2bgfp_survivin_ecad.1050.nd2	6.25	6.07	1.5	0	0	0			0.24	0.242366	13.8865
158	e14Lp_h2bgfp_survivin_ecad.1050.nd2	10.12	10.11	0.5	0	0	0			0.0494071	0.0494272	2.83197
159	e14Lp_h2bgfp_survivin_ecad.1050.nd2	5.96	4.41	4	0	0	0			0.671141	0.735747	42.1552
160	e14Lp_h2bgfp_survivin_ecad.1050.nd2	5.96	3.24	5	0	0	0			0.838926	0.995307	57.0269
161	e14Lp_h2bgfp_survivin_ecad.1050.nd2	7.76	1.98	7.5	0	0	0			0.966495	1.3112	75.1265
162	e14Lp_h2bgfp_survivin_ecad.1050.nd2	6.8	3.2	6	0	0	0			0.882353	1.08084	61.9275
163	e14Lp_h2bgfp_survivin_ecad.1051.nd2	11.47	10.32	5	0	0	0			0.43592	0.45106	25.8438
164	e14Lp_h2bgfp_survivin_ecad.1051.nd2	6.22	5.7	2.5	0	0	0			0.401929	0.413623	23.6988
165	e14Lp_h2bgfp_survivin_ecad.1051.nd2	7.16	4.59	5.5	0	0	0			0.768156	0.875957	50.1886
166	e14Lp_h2bgfp_survivin_ecad.1051.nd2	9.41	5.68	7.5	0	0	0			0.797024	0.922352	52.8469

## Sheet: E15FixedAngles
Item	Source	Length [µm] xyz	Length [µm] xy	Height [µm]	ND.T	ND.Z	ND.M	Comment		sin theta	angle_radians	angle_degrees
1	E15WT1_dapi_khg_mtmg_celsr1_001.nd2	8.94	4	8	0	0	0			0.894855	1.10811	63.4898
2	E15WT1_dapi_khg_mtmg_celsr1_001.nd2	6.8	5.1	4.5	0	0	0			0.661765	0.72317	41.4346
3	E15WT1_dapi_khg_mtmg_celsr1_001.nd2	6.39	3.25	5.5	0	0	0			0.86072	1.03668	59.3975
4	E15WT1_dapi_khg_mtmg_celsr1_001.nd2	7.2	7.13	1	0	0	0			0.138889	0.139339	7.98356
5	E15WT1_dapi_khg_mtmg_celsr1_001.nd2	9.54	5.2	8	0	0	0			0.838574	0.994661	56.9899
6	E15WT1_dapi_khg_mtmg_celsr1_002.nd2	8.65	3.29	8	0	0	0			0.924855	1.18066	67.6466
7	E15WT1_dapi_khg_mtmg_celsr1_002.nd2	7.47	5.55	5	0	0	0			0.669344	0.733326	42.0165
8	E15WT1_dapi_khg_mtmg_celsr1_002.nd2	8.4	6.35	5.5	0	0	0			0.654762	0.713868	40.9016
9	E15WT1_dapi_khg_mtmg_celsr1_003.nd2	5.5	0	5.5	0	0	0			1	1.5708	90
10	E15WT1_dapi_khg_mtmg_celsr1_004.nd2	8.45	8.39	1	0	0	0			0.118343	0.118621	6.79649
11	E15WT1_dapi_khg_mtmg_celsr1_004.nd2	8.02	7.88	1.5	0	0	0			0.187032	0.18814	10.7796
12	E15WT1_dapi_khg_mtmg_celsr1_005.nd2	5.29	5.29	0	0	0	0			0	0	0
13	E15WT1_dapi_khg_mtmg_celsr1_005.nd2	5.6	3.91	4	0	0	0			0.714286	0.795603	45.5847
14	E15WT1_dapi_khg_mtmg_celsr1_005.nd2	7.99	2.76	7.5	0	0	0			0.938673	1.21876	69.8299
15	E15WT1_dapi_khg_mtmg_celsr1_005.nd2	8.48	8.48	0	0	0	0			0	0	0
16	E15WT1_dapi_khg_mtmg_celsr1_006.nd2	9.35	6.19	7	0	0	0			0.748663	0.846043	48.4747
17	E15WT1_dapi_khg_mtmg_celsr1_006.nd2	7.33	7.31	0.5	0	0	0			0.0682128	0.0682658	3.91134
18	E15WT1_dapi_khg_mtmg_celsr1_007.nd2	7.53	2.77	7	0	0	0			0.929615	1.19337	68.3749
19	E15WT1_dapi_khg_mtmg_celsr1_007.nd2	8.19	8.13	1	0	0	0			0.1221	0.122406	7.01332
20	E15WT1_dapi_khg_mtmg_celsr1_007.nd2	8.32	5.76	6	0	0	0			0.721154	0.805466	46.1498
21	E15WT1_dapi_khg_mtmg_celsr1_008.nd2	8.67	8.61	1	0	0	0			0.11534	0.115598	6.62325
22	E15WT1_dapi_khg_mtmg_celsr1_008.nd2	8.81	8.29	3	0	0	0			0.340522	0.347472	19.9087
23	E15WT1_dapi_khg_mtmg_celsr1_008.nd2	8.64	5.69	6.5	0	0	0			0.752315	0.851569	48.7913
24	E15WT1_dapi_khg_mtmg_celsr1_009.nd2	7.25	4.07	6	0	0	0			0.827586	0.974794	55.8516
25	E15WT1_dapi_khg_mtmg_celsr1_009.nd2	9.74	5.55	8	0	0	0			0.821355	0.963783	55.2207
26	E15WT1_dapi_khg_mtmg_celsr1_010.nd2	9.41	9.39	0.5	0	0	0			0.053135	0.05316	3.04584
27	E15WT1_dapi_khg_mtmg_celsr1_010.nd2	8.04	0.81	8	0	0	0			0.995025	1.471	84.2823
28	E15WT1_dapi_khg_mtmg_celsr1_012.nd2	6	0	6	0	0	0			1	1.5708	90
29	E15WT1_dapi_khg_mtmg_celsr1_012.nd2	6.27	5.75	2.5	0	0	0			0.398724	0.410125	23.4984
30	E15WT1_dapi_khg_mtmg_celsr1_012.nd2	8.25	5.08	6.5	0	0	0			0.787879	0.907357	51.9877
31	E15WT1_dapi_khg_mtmg_celsr1_012.nd2	10.45	10.44	0.5	0	0	0			0.0478469	0.0478652	2.74247
32	E15WT1_dapi_khg_mtmg_celsr1_012.nd2	8.58	4.16	7.5	0	0	0			0.874126	1.06363	60.9417
33	E15WT1_dapi_khg_mtmg_celsr1_012.nd2	9.18	9.17	0.5	0	0	0			0.0544662	0.0544932	3.12223
34	E15WT1_dapi_khg_mtmg_celsr1_013.nd2	6.24	3.74	5	0	0	0			0.801282	0.929435	53.2527
35	E15WT1_dapi_khg_mtmg_celsr1_013.nd2	7.43	5.92	4.5	0	0	0			0.605653	0.650586	37.2758
36	E15WT1_dapi_khg_mtmg_celsr1_013.nd2	5.45	2.18	5	0	0	0			0.917431	1.16158	66.5534
37	E15WT1_dapi_khg_mtmg_celsr1_014.nd2	10.96	3.14	10.5	0	0	0			0.958029	1.28005	73.3413
38	E15WT1_dapi_khg_mtmg_celsr1_014.nd2	9.24	3.63	8.5	0	0	0			0.919913	1.16786	66.9134
39	E15WT1_dapi_khg_mtmg_celsr1_014.nd2	9.29	7.49	5.5	0	0	0			0.592034	0.633581	36.3015
40	E15WT1_dapi_khg_mtmg_celsr1_015.nd2	10.09	10.04	1	0	0	0			0.099108	0.099271	5.68781
41	E15WT2_dapi_khg_mtmg_celsr1_001.nd2	8.12	6.4	5	0	0	0			0.615764	0.663355	38.0074
42	E15WT2_dapi_khg_mtmg_celsr1_001.nd2	7.8	6.37	4.5	0	0	0			0.576923	0.614957	35.2344
43	E15WT2_dapi_khg_mtmg_celsr1_001.nd2	6.37	5.32	3.5	0	0	0			0.549451	0.581706	33.3293
44	E15WT2_dapi_khg_mtmg_celsr1_002.nd2	7.47	7.4	1	0	0	0			0.133869	0.134272	7.69321
45	E15WT2_dapi_khg_mtmg_celsr1_002.nd2	7.86	3.57	7	0	0	0			0.890585	1.09863	62.9469
46	E15WT2_dapi_khg_mtmg_celsr1_002.nd2	10.02	10.02	0	0	0	0			0	0	0
47	E15WT2_dapi_khg_mtmg_celsr1_002.nd2	8.97	8.61	2.5	0	0	0			0.278707	0.282447	16.183
48	E15WT2_dapi_khg_mtmg_celsr1_002.nd2	7.53	7.53	0	0	0	0			0	0	0
49	E15WT2_dapi_khg_mtmg_celsr1_002.nd2	8.53	5.53	6.5	0	0	0			0.762016	0.866421	49.6423
50	E15WT2_dapi_khg_mtmg_celsr1_003.nd2	8.76	7.19	5	0	0	0			0.570776	0.607451	34.8044
51	E15WT2_dapi_khg_mtmg_celsr1_003.nd2	6.11	1.15	6	0	0	0			0.981997	1.38076	79.1115
52	E15WT2_dapi_khg_mtmg_celsr1_003.nd2	7.33	7.06	2	0	0	0			0.272851	0.276356	15.834
53	E15WT2_dapi_khg_mtmg_celsr1_003.nd2	8.29	8.29	0	0	0	0			0	0	0
54	E15WT2_dapi_khg_mtmg_celsr1_004.nd2	5.46	3.09	4.5	0	0	0			0.824176	0.968745	55.505
55	E15WT2_dapi_khg_mtmg_celsr1_004.nd2	8.84	6.92	5.5	0	0	0			0.622172	0.671514	38.4749
56	E15WT2_dapi_khg_mtmg_celsr1_004.nd2	6.52	0.49	6.5	0	0	0			0.996933	1.49245	85.5111
57	E15WT2_dapi_khg_mtmg_celsr1_005.nd2	6.42	5.38	3.5	0	0	0			0.545171	0.576593	33.0364
58	E15WT2_dapi_khg_mtmg_celsr1_005.nd2	5.94	5.92	0.5	0	0	0			0.0841751	0.0842748	4.82859
59	E15WT2_dapi_khg_mtmg_celsr1_006.nd2	8.58	7.59	4	0	0	0			0.4662	0.484991	27.7879
60	E15WT2_dapi_khg_mtmg_celsr1_007.nd2	10.11	8.48	5.5	0	0	0			0.544016	0.575216	32.9574
61	E15WT2_dapi_khg_mtmg_celsr1_007.nd2	7.14	5.92	4	0	0	0			0.560224	0.594656	34.0713
62	E15WT2_dapi_khg_mtmg_celsr1_008.nd2	8.58	8.53	1	0	0	0			0.11655	0.116816	6.69304
63	E15WT2_dapi_khg_mtmg_celsr1_009.nd2	11.66	11.62	1	0	0	0			0.0857633	0.0858688	4.91992
64	E15WT2_dapi_khg_mtmg_celsr1_009.nd2	8.72	8.59	1.5	0	0	0			0.172018	0.172878	9.90519
65	E15WT2_dapi_khg_mtmg_celsr1_010.nd2	10.63	3.61	10	0	0	0			0.940734	1.22479	70.1752
66	E15WT2_dapi_khg_mtmg_celsr1_010.nd2	9.79	9.68	1.5	0	0	0			0.153218	0.153823	8.81344
67	E15WT2_dapi_khg_mtmg_celsr1_010.nd2	9.61	7.5	6	0	0	0			0.62435	0.674299	38.6345
68	E15WT2_dapi_khg_mtmg_celsr1_010.nd2	6.92	6.84	1	0	0	0			0.144509	0.145016	8.30883
69	E15WT2_dapi_khg_mtmg_celsr1_010.nd2	9.5	4.24	8.5	0	0	0			0.894737	1.10784	63.4746
70	E15WT2_dapi_khg_mtmg_celsr1_010.nd2	9.6	4.46	8.5	0	0	0			0.885417	1.08739	62.3028
71	E15WT2_dapi_khg_mtmg_celsr1_010.nd2	7.46	7.44	0.5	0	0	0			0.0670241	0.0670744	3.84308
72	E15WT2_dapi_khg_mtmg_celsr1_010.nd2	8.89	4.78	7.5	0	0	0			0.843645	1.00404	57.527
73	E15WT2_dapi_khg_mtmg_celsr1_011.nd2	6.05	5.25	3	0	0	0			0.495868	0.518834	29.727
74	E15WT2_dapi_khg_mtmg_celsr1_011.nd2	8.45	4.74	7	0	0	0			0.828402	0.976249	55.935
75	E15WT2_dapi_khg_mtmg_celsr1_011.nd2	8.62	5.66	6.5	0	0	0			0.75406	0.854222	48.9433
76	E15WT2_dapi_khg_mtmg_celsr1_011.nd2	9.48	6.9	6.5	0	0	0			0.685654	0.755502	43.2871
77	E15WT2_dapi_khg_mtmg_celsr1_011.nd2	6.29	1.9	6	0	0	0			0.953895	1.26596	72.534
78	E15WT2_dapi_khg_mtmg_celsr1_012.nd2	9.39	4	8.5	0	0	0			0.905218	1.13189	64.8527
79	E15WT2_dapi_khg_mtmg_celsr1_012.nd2	7.39	6.5	3.5	0	0	0			0.473613	0.493389	28.2691
80	E15WT2_dapi_khg_mtmg_celsr1_012.nd2	8.99	8.99	0	0	0	0			0	0	0
81	E15WT2_dapi_khg_mtmg_celsr1_012.nd2	9.62	7.09	6.5	0	0	0			0.675676	0.741881	42.5066
82	E15WT2_dapi_khg_mtmg_celsr1_012.nd2	8.53	5.53	6.5	0	0	0			0.762016	0.866421	49.6423
83	E15WT2_dapi_khg_mtmg_celsr1_012.nd2	8.5	8.44	1	0	0	0			0.117647	0.11792	6.75633
84	E15WT2_dapi_khg_mtmg_celsr1_012.nd2	9.65	1.67	9.5	0	0	0			0.984456	1.39425	79.8846
85	E15WT2_dapi_khg_mtmg_celsr1_013.nd2	10.28	7.03	7.5	0	0	0			0.729572	0.817696	46.8505
86	E15WT2_dapi_khg_mtmg_celsr1_013.nd2	10.64	3.63	10	0	0	0			0.93985	1.22219	70.0263
87	E15WT2_dapi_khg_mtmg_celsr1_013.nd2	8.79	6.43	6	0	0	0			0.682594	0.751306	43.0467
88	E15WT2_dapi_khg_mtmg_celsr1_013.nd2	9	8.29	3.5	0	0	0			0.388889	0.399425	22.8854
89	E15WT2_dapi_khg_mtmg_celsr1_013.nd2	8.46	8.33	1.5	0	0	0			0.177305	0.178247	10.2128
90	E15WT2_dapi_khg_mtmg_celsr1_013.nd2	9.43	4.08	8.5	0	0	0			0.901379	1.12294	64.3399
91	E15WT2_dapi_khg_mtmg_celsr1_014.nd2	8.55	3.02	8	0	0	0			0.935673	1.21016	69.3371
92	E15WT2_dapi_khg_mtmg_celsr1_014.nd2	6.5	0	6.5	0	0	0			1	1.5708	90
93	E15WT2_dapi_khg_mtmg_celsr1_014.nd2	8.71	4.42	7.5	0	0	0			0.861079	1.03739	59.438
94	E15WT2_dapi_khg_mtmg_celsr1_014.nd2	5.98	5.96	0.5	0	0	0			0.083612	0.0837098	4.79622
95	E15WT2_dapi_khg_mtmg_celsr1_015.nd2	10.68	1.96	10.5	0	0	0			0.983146	1.38694	79.4658
96	E15WT2_dapi_khg_mtmg_celsr1_015.nd2	7.2	7.2	0	0	0	0			0	0	0
97	E15WT2_dapi_khg_mtmg_celsr1_015.nd2	7	0	7	0	0	0			1	1.5708	90
98	E15WT2_dapi_khg_mtmg_celsr1_015.nd2	9.32	9.2	1.5	0	0	0			0.160944	0.161647	9.26171
99	E15WT3_dapi_vangl2_mtmg_celsr1_002.nd2	9.63	9.51	1.5	0	0	0			0.155763	0.1564	8.96106
100	E15WT3_dapi_vangl2_mtmg_celsr1_002.nd2	7.81	3.45	7	0	0	0			0.896287	1.11132	63.6742
101	E15WT3_dapi_vangl2_mtmg_celsr1_002.nd2	7.14	7.14	0	0	0	0			0	0	0
102	E15WT3_dapi_vangl2_mtmg_celsr1_003.nd2	9.96	9.91	1	0	0	0			0.100402	0.100571	5.7623
103	E15WT3_dapi_vangl2_mtmg_celsr1_003.nd2	6.31	1.96	6	0	0	0			0.950872	1.25604	71.9658
104	E15WT3_dapi_vangl2_mtmg_celsr1_003.nd2	8.47	8.41	1	0	0	0			0.118064	0.11834	6.78037
105	E15WT3_dapi_vangl2_mtmg_celsr1_004.nd2	7.72	6.27	4.5	0	0	0			0.582902	0.622295	35.6549
106	E15WT3_dapi_vangl2_mtmg_celsr1_004.nd2	10.7	10.69	0.5	0	0	0			0.046729	0.046746	2.67835
107	E15WT3_dapi_vangl2_mtmg_celsr1_004.nd2	8.19	6.07	5.5	0	0	0			0.671551	0.7363	42.1869
108	E15WT3_dapi_vangl2_mtmg_celsr1_004.nd2	7.01	6.99	0.5	0	0	0			0.0713267	0.0713873	4.09019
109	E15WT3_dapi_vangl2_mtmg_celsr1_004.nd2	9	0	9	0	0	0			1	1.5708	90
110	E15WT3_dapi_vangl2_mtmg_celsr1_005.nd2	8.46	5.97	6	0	0	0			0.70922	0.788391	45.1715
111	E15WT3_dapi_vangl2_mtmg_celsr1_005.nd2	9.25	4.65	8	0	0	0			0.864865	1.04488	59.8673
112	E15WT3_dapi_vangl2_mtmg_celsr1_005.nd2	6.9	6.83	1	0	0	0			0.144928	0.14544	8.33308
113	E15WT3_dapi_vangl2_mtmg_celsr1_005.nd2	9.01	6.24	6.5	0	0	0			0.721421	0.805852	46.1719
114	E15WT3_dapi_vangl2_mtmg_celsr1_006.nd2	8.56	7.57	4	0	0	0			0.46729	0.486223	27.8585
115	E15WT3_dapi_vangl2_mtmg_celsr1_006.nd2	9.5	7.36	6	0	0	0			0.631579	0.683588	39.1667
116	E15WT3_dapi_vangl2_mtmg_celsr1_006.nd2	9.91	9.91	0	0	0	0			0	0	0
117	E15WT3_dapi_vangl2_mtmg_celsr1_006.nd2	8.6	8.37	2	0	0	0			0.232558	0.234707	13.4477
118	E15WT3_dapi_vangl2_mtmg_celsr1_006.nd2	11.15	10.41	4	0	0	0			0.358744	0.366922	21.0231
119	E15WT3_dapi_vangl2_mtmg_celsr1_006.nd2	9.93	9.92	0.5	0	0	0			0.0503525	0.0503738	2.8862
120	E15WT3_dapi_vangl2_mtmg_celsr1_006.nd2	5.5	0	5.5	0	0	0			1	1.5708	90
121	E15WT3_dapi_vangl2_mtmg_celsr1_007.nd2	8.65	8.65	0	0	0	0			0	0	0
122	E15WT3_dapi_vangl2_mtmg_celsr1_007.nd2	4.56	2.19	4	0	0	0			0.877193	1.06998	61.3056
123	E15WT3_dapi_vangl2_mtmg_celsr1_007.nd2	8.78	6.4	6	0	0	0			0.683371	0.75237	43.1077
124	E15WT3_dapi_vangl2_mtmg_celsr1_007.nd2	7.66	7.64	0.5	0	0	0			0.0652742	0.0653206	3.74259
125	E15WT3_dapi_vangl2_mtmg_celsr1_007.nd2	6.54	5.53	3.5	0	0	0			0.535168	0.564707	32.3553
126	E15WT3_dapi_vangl2_mtmg_celsr1_007.nd2	8.48	7.72	3.5	0	0	0			0.412736	0.425456	24.3768
127	E15WT3_dapi_vangl2_mtmg_celsr1_008.nd2	6.32	5.99	2	0	0	0			0.316456	0.321991	18.4487
128	E15WT3_dapi_vangl2_mtmg_celsr1_008.nd2	5	0	5	0	0	0			1	1.5708	90
129	E15WT3_dapi_vangl2_mtmg_celsr1_008.nd2	5.82	2.99	5	0	0	0			0.859107	1.03352	59.2164
130	E15WT3_dapi_vangl2_mtmg_celsr1_008.nd2	4.51	2.84	3.5	0	0	0			0.776053	0.888383	50.9006
131	E15WT3_dapi_vangl2_mtmg_celsr1_008.nd2	6.76	3.1	6	0	0	0			0.887574	1.09205	62.57
132	E15WT3_dapi_vangl2_mtmg_celsr1_008.nd2	6.38	6.36	0.5	0	0	0			0.0783699	0.0784504	4.49487
133	E15WT3_dapi_vangl2_mtmg_celsr1_009.nd2	6.93	6.86	1	0	0	0			0.1443	0.144806	8.29675
134	E15WT3_dapi_vangl2_mtmg_celsr1_009.nd2	8.03	6.28	5	0	0	0			0.622665	0.672144	38.511
135	E15WT3_dapi_vangl2_mtmg_celsr1_010.nd2	7.35	7.2	1.5	0	0	0			0.204082	0.205526	11.7757
136	E15WT3_dapi_vangl2_mtmg_celsr1_010.nd2	8.35	2.4	8	0	0	0			0.958084	1.28024	73.3522
137	E15WT3_dapi_vangl2_mtmg_celsr1_010.nd2	8.02	2.84	7.5	0	0	0			0.935162	1.20872	69.2543
138	E15WT3_dapi_vangl2_mtmg_celsr1_011.nd2	6.07	0.95	6	0	0	0			0.988468	1.41878	81.2902
139	E15WT3_dapi_vangl2_mtmg_celsr1_011.nd2	9.16	9.03	1.5	0	0	0			0.163755	0.164496	9.42494
140	E15WT3_dapi_vangl2_mtmg_celsr1_011.nd2	9.27	8.92	2.5	0	0	0			0.269687	0.273068	15.6457
141	E15WT3_dapi_vangl2_mtmg_celsr1_012.nd2	8.04	7.98	1	0	0	0			0.124378	0.124701	7.14484
142	E15WT3_dapi_vangl2_mtmg_celsr1_012.nd2	9.05	5.74	7	0	0	0			0.773481	0.884314	50.6675
143	E15WT3_dapi_vangl2_mtmg_celsr1_012.nd2	8.84	3.77	8	0	0	0			0.904977	1.13133	64.8202
144	E15WT3_dapi_vangl2_mtmg_celsr1_012.nd2	9.52	9.52	0	0	0	0			0	0	0
145	E15WT3_dapi_vangl2_mtmg_celsr1_013.nd2	6.39	3.25	5.5	0	0	0			0.86072	1.03668	59.3975
146	E15WT3_dapi_vangl2_mtmg_celsr1_013.nd2	7.72	6.28	4.5	0	0	0			0.582902	0.622295	35.6549
147	E15WT3_dapi_vangl2_mtmg_celsr1_014.nd2	5.89	2.11	5.5	0	0	0			0.933786	1.20485	69.0329
148	E15WT3_dapi_vangl2_mtmg_celsr1_014.nd2	6.5	0	6.5	0	0	0			1	1.5708	90
149	E15WT3_dapi_vangl2_mtmg_celsr1_014.nd2	7.44	6.27	4	0	0	0			0.537634	0.567629	32.5227
150	E15WT3_dapi_vangl2_mtmg_celsr1_015.nd2	8.17	7.78	2.5	0	0	0			0.305998	0.310986	17.8182
151	E15WT3_dapi_vangl2_mtmg_celsr1_015.nd2	5.17	1.31	5	0	0	0			0.967118	1.31364	75.2662
152	E15WT3_dapi_vangl2_mtmg_celsr1_015.nd2	7.75	5.92	5	0	0	0			0.645161	0.701234	40.1778
Item	Source	Length [µm] xyz	Length [µm] xy	Height [µm]	ND.T	ND.Z	ND.M	Comment		sin theta	angle_radians	angle_degrees
1	E15Tm1_dapi_khg_mtmg_celsr1_001.nd2	4	0	4	0	0	0			1	1.5708	90
2	E15Tm1_dapi_khg_mtmg_celsr1_001.nd2	9.24	9.23	0.5	0	0	0			0.0541126	0.054139	3.10194
3	E15Tm1_dapi_khg_mtmg_celsr1_001.nd2	8.84	8.61	2	0	0	0			0.226244	0.22822	13.0761
4	E15Tm1_dapi_khg_mtmg_celsr1_001.nd2	7.59	7.59	0	0	0	0			0	0	0
5	E15Tm1_dapi_khg_mtmg_celsr1_001.nd2	5.4	4.11	3.5	0	0	0			0.648148	0.70515	40.4021
6	E15Tm1_dapi_khg_mtmg_celsr1_002.nd2	8.64	6.66	5.5	0	0	0			0.636574	0.690048	39.5368
7	E15Tm1_dapi_khg_mtmg_celsr1_002.nd2	6.09	1.03	6	0	0	0			0.985222	1.39866	80.1375
8	E15Tm1_dapi_khg_mtmg_celsr1_003.nd2	5	3	4	0	0	0			0.8	0.927295	53.1301
9	E15Tm1_dapi_khg_mtmg_celsr1_003.nd2	9.02	5.01	7.5	0	0	0			0.831486	0.981776	56.2516
10	E15Tm1_dapi_khg_mtmg_celsr1_003.nd2	6.93	2.42	6.5	0	0	0			0.937951	1.21667	69.7102
11	E15Tm1_dapi_khg_mtmg_celsr1_003.nd2	8.58	1.18	8.5	0	0	0			0.990676	1.43413	82.1697
12	E15Tm1_dapi_khg_mtmg_celsr1_003.nd2	6.44	4.06	5	0	0	0			0.776398	0.888929	50.9319
13	E15Tm1_dapi_khg_mtmg_celsr1_003.nd2	8.32	3.61	7.5	0	0	0			0.901442	1.12309	64.3483
14	E15Tm1_dapi_khg_mtmg_celsr1_003.nd2	8.07	4.02	7	0	0	0			0.86741	1.04997	60.1591
15	E15Tm1_dapi_khg_mtmg_celsr1_004.nd2	13.16	13.16	0	0	0	0			0	0	0
16	E15Tm1_dapi_khg_mtmg_celsr1_004.nd2	9.14	5.87	7	0	0	0			0.765864	0.872384	49.9839
17	E15Tm1_dapi_khg_mtmg_celsr1_005.nd2	9.89	2.76	9.5	0	0	0			0.960566	1.28903	73.8561
18	E15Tm1_dapi_khg_mtmg_celsr1_006.nd2	5.68	2.7	5	0	0	0			0.880282	1.07646	61.6764
19	E15Tm1_dapi_khg_mtmg_celsr1_006.nd2	8.31	5.17	6.5	0	0	0			0.78219	0.898173	51.4615
20	E15Tm1_dapi_khg_mtmg_celsr1_006.nd2	8.24	1.96	8	0	0	0			0.970874	1.32885	76.1376
21	E15Tm1_dapi_khg_mtmg_celsr1_006.nd2	9.04	3.09	8.5	0	0	0			0.940265	1.22341	70.0962
22	E15Tm1_dapi_khg_mtmg_celsr1_006.nd2	9.1	3.25	8.5	0	0	0			0.934066	1.20563	69.0778
23	E15Tm1_dapi_khg_mtmg_celsr1_007.nd2	5.89	2.11	5.5	0	0	0			0.933786	1.20485	69.0329
24	E15Tm1_dapi_khg_mtmg_celsr1_007.nd2	8.7	7.73	4	0	0	0			0.45977	0.477736	27.3723
25	E15Tm1_dapi_khg_mtmg_celsr1_008.nd2	11.09	10.91	2	0	0	0			0.180343	0.181335	10.3897
26	E15Tm1_dapi_khg_mtmg_celsr1_008.nd2	8.92	8.8	1.5	0	0	0			0.168161	0.168964	9.68094
27	E15Tm1_dapi_khg_mtmg_celsr1_008.nd2	6.68	1.53	6.5	0	0	0			0.973054	1.33812	76.6689
28	E15Tm1_dapi_khg_mtmg_celsr1_009.nd2	8.41	7.11	4.5	0	0	0			0.535077	0.564599	32.3492
29	E15Tm1_dapi_khg_mtmg_celsr1_009.nd2	7.19	6.28	3.5	0	0	0			0.486787	0.508408	29.1296
30	E15Tm1_dapi_khg_mtmg_celsr1_009.nd2	6.9	6.83	1	0	0	0			0.144928	0.14544	8.33308
31	E15Tm1_dapi_khg_mtmg_celsr1_010.nd2	8.22	4.32	7	0	0	0			0.851582	1.01899	58.3841
32	E15Tm1_dapi_khg_mtmg_celsr1_010.nd2	8.18	1.73	8	0	0	0			0.977995	1.36062	77.958
33	E15Tm1_dapi_khg_mtmg_celsr1_010.nd2	8.77	3.59	8	0	0	0			0.912201	1.14862	65.8113
34	E15Tm1_dapi_khg_mtmg_celsr1_010.nd2	8.8	7.24	5	0	0	0			0.568182	0.604295	34.6235
35	E15Tm1_dapi_khg_mtmg_celsr1_011.nd2	7.54	0.81	7.5	0	0	0			0.994695	1.46775	84.0956
36	E15Tm1_dapi_khg_mtmg_celsr1_011.nd2	7.5	2.7	7	0	0	0			0.933333	1.20359	68.9605
37	E15Tm1_dapi_khg_mtmg_celsr1_011.nd2	7.42	2.46	7	0	0	0			0.943396	1.23273	70.63
38	E15Tm1_dapi_khg_mtmg_celsr1_011.nd2	6.5	3.45	5.5	0	0	0			0.846154	1.00873	57.7958
39	E15Tm1_dapi_khg_mtmg_celsr1_011.nd2	7.68	1.67	7.5	0	0	0			0.976562	1.35386	77.5707
40	E15Tm1_dapi_khg_mtmg_celsr1_012.nd2	8.35	8.29	1	0	0	0			0.11976	0.120049	6.87828
41	E15Tm1_dapi_khg_mtmg_celsr1_012.nd2	4.63	1.09	4.5	0	0	0			0.971922	1.33327	76.3906
42	E15Tm1_dapi_khg_mtmg_celsr1_013.nd2	6.82	5.52	4	0	0	0			0.58651	0.626743	35.9098
43	E15Tm1_dapi_khg_mtmg_celsr1_013.nd2	5.66	3.43	4.5	0	0	0			0.795053	0.919095	52.6603
44	E15Tm1_dapi_khg_mtmg_celsr1_013.nd2	6.88	2.26	6.5	0	0	0			0.944767	1.23688	70.8682
45	E15Tm1_dapi_khg_mtmg_celsr1_014.nd2	4.67	2.42	4	0	0	0			0.856531	1.02851	58.9293
46	E15Tm1_dapi_khg_mtmg_celsr1_014.nd2	6.04	0.67	6	0	0	0			0.993377	1.45565	83.4024
47	E15Tm1_dapi_khg_mtmg_celsr1_014.nd2	6.08	4.58	4	0	0	0			0.657895	0.71802	41.1395
48	E15Tm1_dapi_khg_mtmg_celsr1_015.nd2	10.69	7.62	7.5	0	0	0			0.70159	0.777627	44.5547
49	E15Tm1_dapi_khg_mtmg_celsr1_015.nd2	10.27	10.08	2	0	0	0			0.194742	0.195994	11.2297
50	E15Tm1_dapi_khg_mtmg_celsr1_015.nd2	10.29	10.18	1.5	0	0	0			0.145773	0.146294	8.38202
51	E15Tm2_dapi_vangl2_mtmg_celsr1_001.nd2	5.97	3.27	5	0	0	0			0.837521	0.99273	56.8793
52	E15Tm2_dapi_vangl2_mtmg_celsr1_001.nd2	6.24	1.73	6	0	0	0			0.961538	1.29255	74.0576
53	E15Tm2_dapi_vangl2_mtmg_celsr1_002.nd2	7.32	7.3	0.5	0	0	0			0.068306	0.0683592	3.9167
54	E15Tm2_dapi_vangl2_mtmg_celsr1_002.nd2	7.25	4.72	5.5	0	0	0			0.758621	0.861193	49.3428
55	E15Tm2_dapi_vangl2_mtmg_celsr1_003.nd2	9.87	8.79	4.5	0	0	0			0.455927	0.473414	27.1246
56	E15Tm2_dapi_vangl2_mtmg_celsr1_003.nd2	6.01	5.21	3	0	0	0			0.499168	0.522638	29.945
57	E15Tm2_dapi_vangl2_mtmg_celsr1_004.nd2	5.05	0.73	5	0	0	0			0.990099	1.42996	81.9307
58	E15Tm2_dapi_vangl2_mtmg_celsr1_004.nd2	9.54	9.54	0	0	0	0			0	0	0
59	E15Tm2_dapi_vangl2_mtmg_celsr1_004.nd2	6.13	6.11	0.5	0	0	0			0.0815661	0.0816568	4.67859
60	E15Tm2_dapi_vangl2_mtmg_celsr1_005.nd2	3.26	1.27	3	0	0	0			0.920245	1.16871	66.962
61	E15Tm2_dapi_vangl2_mtmg_celsr1_005.nd2	7.3	6.41	3.5	0	0	0			0.479452	0.50003	28.6496
62	E15Tm2_dapi_vangl2_mtmg_celsr1_006.nd2	5	0	5	0	0	0			1	1.5708	90
63	E15Tm2_dapi_vangl2_mtmg_celsr1_006.nd2	10.1	10.05	1	0	0	0			0.0990099	0.0991724	5.68216
64	E15Tm2_dapi_vangl2_mtmg_celsr1_006.nd2	7	6.83	1.5	0	0	0			0.214286	0.21596	12.3736
65	E15Tm2_dapi_vangl2_mtmg_celsr1_007.nd2	9.39	9.38	0.5	0	0	0			0.0532481	0.0532733	3.05234
66	E15Tm2_dapi_vangl2_mtmg_celsr1_007.nd2	7.59	7.44	1.5	0	0	0			0.197628	0.198938	11.3983
67	E15Tm2_dapi_vangl2_mtmg_celsr1_007.nd2	7	6.93	1	0	0	0			0.142857	0.143348	8.21321
68	E15Tm2_dapi_vangl2_mtmg_celsr1_007.nd2	8.84	8.84	0	0	0	0			0	0	0
69	E15Tm2_dapi_vangl2_mtmg_celsr1_008.nd2	8.15	6.01	5.5	0	0	0			0.674847	0.740757	42.4422
70	E15Tm2_dapi_vangl2_mtmg_celsr1_008.nd2	5.87	5.05	3	0	0	0			0.511073	0.536433	30.7353
71	E15Tm2_dapi_vangl2_mtmg_celsr1_008.nd2	7.3	4.15	6	0	0	0			0.821918	0.96477	55.2772
72	E15Tm2_dapi_vangl2_mtmg_celsr1_009.nd2	6.79	1.96	6.5	0	0	0			0.95729	1.27748	73.1942
73	E15Tm2_dapi_vangl2_mtmg_celsr1_009.nd2	8.77	7.8	4	0	0	0			0.4561	0.473608	27.1358
74	E15Tm2_dapi_vangl2_mtmg_celsr1_009.nd2	5.29	5.29	0	0	0	0			0	0	0
75	E15Tm2_dapi_vangl2_mtmg_celsr1_009.nd2	8.28	8.14	1.5	0	0	0			0.181159	0.182165	10.4373
76	E15Tm2_dapi_vangl2_mtmg_celsr1_009.nd2	10.66	10.55	1.5	0	0	0			0.140713	0.141181	8.0891
77	E15Tm2_dapi_vangl2_mtmg_celsr1_010.nd2	8.06	7.49	3	0	0	0			0.372208	0.381387	21.8519
78	E15Tm2_dapi_vangl2_mtmg_celsr1_012.nd2	5.94	5.13	3	0	0	0			0.505051	0.52944	30.3347
79	E15Tm2_dapi_vangl2_mtmg_celsr1_014.nd2	9.33	8.83	3	0	0	0			0.321543	0.327359	18.7563
80	E15Tm2_dapi_vangl2_mtmg_celsr1_014.nd2	7.37	7.37	0	0	0	0			0	0	0
81	E15Tm2_dapi_vangl2_mtmg_celsr1_014.nd2	5.97	5.89	1	0	0	0			0.167504	0.168298	9.64274
82	E15Tm2_dapi_vangl2_mtmg_celsr1_014.nd2	8.19	8.13	1	0	0	0			0.1221	0.122406	7.01332
83	E15Tm2_dapi_vangl2_mtmg_celsr1_015.nd2	8.66	6.24	6	0	0	0			0.692841	0.765421	43.8554
84	E15Tm2_dapi_vangl2_mtmg_celsr1_015.nd2	8.3	6.22	5.5	0	0	0			0.662651	0.724352	41.5023
85	E15Tm3_dapi_vangl2_mtmg_celsr1_001.nd2	4.61	3.5	3	0	0	0			0.650759	0.708584	40.5989
86	E15Tm3_dapi_vangl2_mtmg_celsr1_001.nd2	8.23	8.17	1	0	0	0			0.121507	0.121808	6.97907
87	E15Tm3_dapi_vangl2_mtmg_celsr1_001.nd2	8.5	7.95	3	0	0	0			0.352941	0.360713	20.6673
88	E15Tm3_dapi_vangl2_mtmg_celsr1_001.nd2	6.14	4.66	4	0	0	0			0.651466	0.709515	40.6522
89	E15Tm3_dapi_vangl2_mtmg_celsr1_002.nd2	9.83	9.83	0	0	0	0			0	0	0
90	E15Tm3_dapi_vangl2_mtmg_celsr1_002.nd2	7.34	5.37	5	0	0	0			0.681199	0.749399	42.9374
91	E15Tm3_dapi_vangl2_mtmg_celsr1_002.nd2	6.75	6.27	2.5	0	0	0			0.37037	0.379408	21.7385
92	E15Tm3_dapi_vangl2_mtmg_celsr1_003.nd2	4.58	0.83	4.5	0	0	0			0.982533	1.38362	79.2753
93	E15Tm3_dapi_vangl2_mtmg_celsr1_005.nd2	3.68	2.14	3	0	0	0			0.815217	0.953104	54.6089
94	E15Tm3_dapi_vangl2_mtmg_celsr1_005.nd2	7.28	7.27	0.5	0	0	0			0.0686813	0.0687354	3.93825
95	E15Tm3_dapi_vangl2_mtmg_celsr1_006.nd2	8.59	8.53	1	0	0	0			0.116414	0.116679	6.68521
96	E15Tm3_dapi_vangl2_mtmg_celsr1_006.nd2	10.34	10.34	0	0	0	0			0	0	0
97	E15Tm3_dapi_vangl2_mtmg_celsr1_007.nd2	9.15	8.45	3.5	0	0	0			0.382514	0.392515	22.4895
98	E15Tm3_dapi_vangl2_mtmg_celsr1_008.nd2	5.91	5.09	3	0	0	0			0.507614	0.532413	30.505
99	E15Tm3_dapi_vangl2_mtmg_celsr1_008.nd2	6.07	2.57	5.5	0	0	0			0.906096	1.13396	64.9712
100	E15Tm3_dapi_vangl2_mtmg_celsr1_009.nd2	6.97	6.9	1	0	0	0			0.143472	0.143969	8.24881
101	E15Tm3_dapi_vangl2_mtmg_celsr1_009.nd2	5.8	1.85	5.5	0	0	0			0.948276	1.24776	71.4914
102	E15Tm3_dapi_vangl2_mtmg_celsr1_009.nd2	6.22	5.7	2.5	0	0	0			0.401929	0.413623	23.6988
103	E15Tm3_dapi_vangl2_mtmg_celsr1_009.nd2	6.55	6.37	1.5	0	0	0			0.229008	0.231058	13.2387
104	E15Tm3_dapi_vangl2_mtmg_celsr1_010.nd2	6.29	1.9	6	0	0	0			0.953895	1.26596	72.534
105	E15Tm3_dapi_vangl2_mtmg_celsr1_010.nd2	7.51	4.52	6	0	0	0			0.798935	0.925522	53.0285
106	E15Tm3_dapi_vangl2_mtmg_celsr1_011.nd2	9.63	9.63	0	0	0	0			0	0	0
107	E15Tm3_dapi_vangl2_mtmg_celsr1_011.nd2	5.67	3.45	4.5	0	0	0			0.793651	0.916787	52.528
108	E15Tm3_dapi_vangl2_mtmg_celsr1_011.nd2	8.03	2.87	7.5	0	0	0			0.933998	1.20544	69.0668
109	E15Tm3_dapi_vangl2_mtmg_celsr1_011.nd2	6.63	5.91	3	0	0	0			0.452489	0.469554	26.9035
110	E15Tm3_dapi_vangl2_mtmg_celsr1_012.nd2	7.42	4.37	6	0	0	0			0.808625	0.941812	53.9618
111	E15Tm3_dapi_vangl2_mtmg_celsr1_012.nd2	8.84	8.32	3	0	0	0			0.339367	0.346243	19.8383
112	E15Tm3_dapi_vangl2_mtmg_celsr1_013.nd2	6.65	4.39	5	0	0	0			0.75188	0.850909	48.7535
113	E15Tm3_dapi_vangl2_mtmg_celsr1_013.nd2	10.23	10.18	1	0	0	0			0.0977517	0.0979081	5.60972
114	E15Tm3_dapi_vangl2_mtmg_celsr1_013.nd2	6.02	0.49	6	0	0	0			0.996678	1.48926	85.3283
115	E15Tm3_dapi_vangl2_mtmg_celsr1_014.nd2	5.81	3.68	4.5	0	0	0			0.774527	0.885966	50.7621
116	E15Tm3_dapi_vangl2_mtmg_celsr1_014.nd2	6.92	6.84	1	0	0	0			0.144509	0.145016	8.30883

## Sheet: E16FixedAngles
Item	Source	Length xyz	Length xy	Height	ND.T	ND.Z	ND.M	Comment		sin theta	angle_radians	angle_degrees
1	e16wt_h2bgfp_ecad.nd2	7.86	2.35	7.5	0	0	0			0.954198	1.26697	72.592
2	e16wt_h2bgfp_ecad001.nd2	7.55	4.58	6	0	0	0			0.794702	0.918516	52.6271
3	e16wt_h2bgfp_ecad001.nd2	9.89	9.89	0	0	0	0			0	0	0
4	e16wt_h2bgfp_ecad002.nd2	8.7	5.17	7	0	0	0			0.804598	0.934998	53.5714
5	e16wt_h2bgfp_ecad002.nd2	9.25	9.19	1	0	0	0			0.108108	0.10832	6.20627
6	e16wt_h2bgfp_ecad003.nd2	8.08	4.04	7	0	0	0			0.866337	1.04782	60.0357
7	e16wt_h2bgfp_ecad003.nd2	5.59	5.5	1	0	0	0			0.178891	0.179859	10.3052
8	e16wt_h2bgfp_ecad003.nd2	8.12	8.05	1	0	0	0			0.123153	0.123466	7.07409
9	e16wt_h2bgfp_ecad004.nd2	10.12	9.81	2.5	0	0	0			0.247036	0.24962	14.3022
10	e16wt_h2bgfp_ecad004.nd2	9.74	9.62	1.5	0	0	0			0.154004	0.154619	8.85904
11	e16wt_h2bgfp_ecad004.nd2	8.81	6.45	6	0	0	0			0.681044	0.749188	42.9253
12	e16wt_h2bgfp_ecad004.nd2	10.99	4.55	10	0	0	0			0.909918	1.14309	65.494
13	e16wt_h2bgfp_ecad005.nd2	9.4	4.02	8.5	0	0	0			0.904255	1.12963	64.7232
14	e16wt_h2bgfp_ecad005.nd2	8.79	8.66	1.5	0	0	0			0.170648	0.171488	9.82552
15	e16wt_h2bgfp_ecad006.nd2	8.68	8.55	1.5	0	0	0			0.172811	0.173683	9.9513
16	e16wt_h2bgfp_ecad006.nd2	6.42	4.58	4.5	0	0	0			0.700935	0.776707	44.502
17	e16wt_h2bgfp_ecad006.nd2	5.12	2.44	4.5	0	0	0			0.878906	1.07356	61.5107
18	e16wt_h2bgfp_ecad007.nd2	6.43	6.41	0.5	0	0	0			0.0777605	0.0778391	4.45985
19	e16wt_h2bgfp_ecad007.nd2	6.61	1.22	6.5	0	0	0			0.983359	1.38811	79.5326
20	e16wt_h2bgfp_ecad007.nd2	8.5	5.47	6.5	0	0	0			0.764706	0.870585	49.8808
21	e16wt_h2bgfp_ecad008.nd2	7.75	7.74	0.5	0	0	0			0.0645161	0.064561	3.69907
22	e16wt_h2bgfp_ecad008.nd2	9.97	3.02	9.5	0	0	0			0.952859	1.26252	72.3372
23	e16wt_h2bgfp_ecad008.nd2	8.82	3.71	8	0	0	0			0.907029	1.13617	65.098
24	e16wt_h2bgfp_ecad009.nd2	8.15	8.15	0	0	0	0			0	0	0
25	e16wt_h2bgfp_ecad009.nd2	8.55	8.42	1.5	0	0	0			0.175439	0.176351	10.1042
26	e16wt_h2bgfp_ecad009.nd2	8.88	6.54	6	0	0	0			0.675676	0.741881	42.5066
27	e16wt_h2bgfp_ecad010.nd2	9.67	5.43	8	0	0	0			0.827301	0.974286	55.8225
28	e16wt_h2bgfp_ecad010.nd2	10.16	9.7	3	0	0	0			0.295276	0.299744	17.1741
29	e16wt_h2bgfp_ecad011.nd2	5.89	5.8	1	0	0	0			0.169779	0.170606	9.77499
30	e16wt_h2bgfp_ecad011.nd2	10.66	10.07	3.5	0	0	0			0.32833	0.334535	19.1675
31	e16wt_h2bgfp_ecad011.nd2	8.28	2.14	8	0	0	0			0.966184	1.30999	75.0572
32	e16wt_h2bgfp_ecad011.nd2	9.14	1.59	9	0	0	0			0.984683	1.39554	79.9588
33	e16wt_h2bgfp_ecad011.nd2	9.04	0.87	9	0	0	0			0.995575	1.47669	84.6081
34	e16wt_h2bgfp_ecad011.nd2	9.71	3.65	9	0	0	0			0.92688	1.18601	67.9535
35	e16wt_h2bgfp_ecad012.nd2	10.12	10.07	1	0	0	0			0.0988142	0.0989757	5.67089
36	e16wt_h2bgfp_ecad012.nd2	9.01	9	0.5	0	0	0			0.0554939	0.0555224	3.1812
37	e16wt_h2bgfp_ecad012.nd2	9.94	9.93	0.5	0	0	0			0.0503018	0.050323	2.8833
38	e16wt_h2bgfp_ecad012.nd2	9.82	2.5	9.5	0	0	0			0.967413	1.31481	75.3329
39	e16wt_h2bgfp_ecad012.nd2	11.79	2.59	11.5	0	0	0			0.975403	1.34854	77.2657
40	e16wt_h2bgfp_ecad013.nd2	10.1	1.39	10	0	0	0			0.990099	1.42996	81.9307
41	e16wt_h2bgfp_ecad013.nd2	8.79	3.64	8	0	0	0			0.910125	1.14359	65.5227
42	e16wt_h2bgfp_ecad014.nd2	8.27	8.2	1	0	0	0			0.120919	0.121216	6.94514
43	e16wt_h2bgfp_ecad014.nd2	5.21	5.19	0.5	0	0	0			0.0959693	0.0961172	5.50711
44	e16wt_h2bgfp_ecad014.nd2	9.22	8.31	4	0	0	0			0.433839	0.44875	25.7115
45	e16wt_h2bgfp_ecad014.nd2	6.14	6.14	0	0	0	0			0	0	0
46	e16wt_h2bgfp_ecad014.nd2	9	7.79	4.5	0	0	0			0.5	0.523599	30
47	e16wt_h2bgfp_ecad014.nd2	8.61	7.34	4.5	0	0	0			0.522648	0.549954	31.51
48	e16wt_h2bgfp_ecad015.nd2	9.46	6.36	7	0	0	0			0.739958	0.833007	47.7278
49	e16wt_h2bgfp_ecad016.nd2	10	9.54	3	0	0	0			0.3	0.304693	17.4576
50	e16wt_h2bgfp_ecad016.nd2	6.62	5.27	4	0	0	0			0.60423	0.648799	37.1734
51	e16wt_h2bgfp_ecad018.nd2	9.65	9.65	0	0	0	0			0	0	0
52	e16wt_h2bgfp_ecad018.nd2	8.99	8.86	1.5	0	0	0			0.166852	0.167636	9.60484
53	e16wt_h2bgfp_ecad018.nd2	9.51	9.46	1	0	0	0			0.105152	0.105347	6.03595
54	e16wt_h2bgfp_ecad019.nd2	8.26	8.26	0	0	0	0			0	0	0
55	e16wt_h2bgfp_ecad019.nd2	9.78	9.58	2	0	0	0			0.204499	0.205952	11.8002
56	e16wt_h2bgfp_ecad019.nd2	9.81	9.81	0	0	0	0			0	0	0
57	e16wt_h2bgfp_ecad019.nd2	9.38	9.38	0	0	0	0			0	0	0
58	e16wt_h2bgfp_ecad019.nd2	8.72	8.71	0.5	0	0	0			0.0573394	0.0573709	3.28711
59	e16wt_h2bgfp_ecad019.nd2	8.98	8.75	2	0	0	0			0.222717	0.224601	12.8687
60	e16wt_h2bgfp_ecad019.nd2	5.7	3.5	4.5	0	0	0			0.789474	0.909951	52.1364
61	e16wt_h2bgfp_ecad019.nd2	7.64	3.06	7	0	0	0			0.91623	1.15857	66.3811
62	e16wt_h2bgfp_ecad020.nd2	10.38	10.38	0	0	0	0			0	0	0
63	e16wt_h2bgfp_ecad021.nd2	9.42	8.75	3.5	0	0	0			0.37155	0.380678	21.8112
64	e16wt_h2bgfp_ecad021.nd2	7.85	6.05	5	0	0	0			0.636943	0.690526	39.5642
65	e16wt_h2bgfp_ecad021.nd2	8.16	1.63	8	0	0	0			0.980392	1.37244	78.6351
66	e16wt_h2bgfp_ecad022.nd2	9.15	9.03	1.5	0	0	0			0.163934	0.164678	9.43534
67	e16wt_h2bgfp_ecad022.nd2	5.97	5.89	1	0	0	0			0.167504	0.168298	9.64274
68	e16wt_h2bgfp_ecad022.nd2	6.92	5.98	3.5	0	0	0			0.50578	0.530286	30.3832
69	e16wt_h2bgfp_ecad023.nd2	5.52	5.52	0	0	0	0			0	0	0
70	e16wt_h2bgfp_ecad023.nd2	9.67	7.16	6.5	0	0	0			0.672182	0.737152	42.2357
71	e16wt_h2bgfp_ecad023.nd2	11.73	2.3	11.5	0	0	0			0.980392	1.37244	78.6351
72	e16wt_h2bgfp_ecad023.nd2	11.58	1.34	11.5	0	0	0			0.993092	1.45318	83.2613
73	e16wt_h2bgfp_ecad024.nd2	9.25	9.12	1.5	0	0	0			0.162162	0.162881	9.33242
74	e16wt_h2bgfp_ecad024.nd2	9.57	9.36	2	0	0	0			0.208986	0.210538	12.063
75	e16wt_h2bgfp_ecad024.nd2	9.17	9.15	0.5	0	0	0			0.0545256	0.0545527	3.12564
76	e16wt_h2bgfp_ecad025.nd2	9.61	9.56	1	0	0	0			0.104058	0.104247	5.97291
77	e16wt_h2bgfp_ecad025.nd2	7.74	7.14	3	0	0	0			0.387597	0.398023	22.8051
78	e16wt_h2bgfp_ecad025.nd2	5.45	3.08	4.5	0	0	0			0.825688	0.971421	55.6583
79	e16wt_h2bgfp_ecad025.nd2	12.2	2.18	12	0	0	0			0.983607	1.38948	79.6111
80	e16wt_h2bgfp_ecad025.nd2	7.6	5.24	5.5	0	0	0			0.723684	0.809126	46.3595
81	e16wt_h2bgfp_ecad025.nd2	6.35	2.08	6	0	0	0			0.944882	1.23723	70.8883
82	e16wt_h2bgfp_ecad026.nd2	5.61	5.53	1	0	0	0			0.178253	0.179211	10.268
83	e16wt_h2bgfp_ecad026.nd2	15.84	3.27	15.5	0	0	0			0.978535	1.36323	78.1073
84	e16wt_h2bgfp_ecad027.nd2	8.13	8.13	0	0	0	0			0	0	0
85	e16wt_h2bgfp_ecad027.nd2	9.5	4.24	8.5	0	0	0			0.894737	1.10784	63.4746
86	e16wt_h2bgfp_ecad027.nd2	12.08	1.38	12	0	0	0			0.993377	1.45565	83.4024
87	e16wt_h2bgfp_ecad027.nd2	12.46	3.35	12	0	0	0			0.963082	1.29823	74.3828
88	e16wt_h2bgfp_ecad027.nd2	17.68	2.54	17.5	0	0	0			0.989819	1.42798	81.8172
89	e16wt_h2bgfp_ecad028.nd2	4.85	4.42	2	0	0	0			0.412371	0.425055	24.3539
90	e16wt_h2bgfp_ecad028.nd2	9.02	7.15	5.5	0	0	0			0.609756	0.655753	37.5719
91	e16wt_h2bgfp_ecad028.nd2	7.48	3.71	6.5	0	0	0			0.868984	1.05315	60.3408
92	e16wt_h2bgfp_ecad028.nd2	7.24	6.96	2	0	0	0			0.276243	0.279883	16.0361
93	e16wt_h2bgfp_ecad029.nd2	3.82	3.25	2	0	0	0			0.52356	0.551024	31.5714
94	e16wt_h2bgfp_ecad029.nd2	7.56	7.56	0	0	0	0			0	0	0
95	e16wt_h2bgfp_ecad029.nd2	7.84	7.83	0.5	0	0	0			0.0637755	0.0638188	3.65655
96	e16wt_h2bgfp_ecad029.nd2	8.9	7.37	5	0	0	0			0.561798	0.596557	34.1802
97	e16wt_h2bgfp_ecad029.nd2	7.16	6.5	3	0	0	0			0.418994	0.432338	24.7711
98	e16wt_h2bgfp_ecad029.nd2	6.5	0	6.5	0	0	0			1	1.5708	90
99	e16wt_h2bgfp_ecad030.nd2	7.49	7.22	2	0	0	0			0.267023	0.270302	15.4872
100	e16wt_h2bgfp_ecad030.nd2	8.11	5.97	5.5	0	0	0			0.678175	0.745277	42.7012
101	e16wt_h2bgfp_ecad030.nd2	9.06	5.75	7	0	0	0			0.772627	0.882969	50.5904
102	e16wt_h2bgfp_ecad030.nd2	11.14	1.75	11	0	0	0			0.987433	1.41209	80.9068
103	e16wt_h2bgfp_ecad031.nd2	8.91	8.78	1.5	0	0	0			0.16835	0.169156	9.69191
104	e16wt_h2bgfp_ecad031.nd2	7.19	7.19	0	0	0	0			0	0	0
105	e16wt_h2bgfp_ecad032.nd2	9	8.94	1	0	0	0			0.111111	0.111341	6.37937
106	e16wt_h2bgfp_ecad032.nd2	7.08	1.03	7	0	0	0			0.988701	1.42033	81.3786
107	e16wt_h2bgfp_ecad032.nd2	10.46	3.07	10	0	0	0			0.956023	1.27313	72.9449
108	e16wt_h2bgfp_ecad033.nd2	8.34	8.2	1.5	0	0	0			0.179856	0.18084	10.3614
109	e16wt_h2bgfp_ecad034.nd2	4.5	4.24	1.5	0	0	0			0.333333	0.339837	19.4712
110	e16wt_h2bgfp_ecad034.nd2	7.5	7.48	0.5	0	0	0			0.0666667	0.0667161	3.82255
111	e16wt_h2bgfp_ecad034.nd2	9.24	3.63	8.5	0	0	0			0.919913	1.16786	66.9134
112	e16wt_h2bgfp_ecad034.nd2	7.1	1.17	7	0	0	0			0.985915	1.40276	80.3724
113	e16wt_h2bgfp_ecad035.nd2	8.06	8.05	0.5	0	0	0			0.0620347	0.0620746	3.55661
114	e16wt_h2bgfp_ecad035.nd2	9.45	9.45	0	0	0	0			0	0	0
115	e16wt_h2bgfp_ecad035.nd2	8.33	6.25	5.5	0	0	0			0.660264	0.72117	41.32
116	e16wt_h2bgfp_ecad036.nd2	9.42	4.97	8	0	0	0			0.849257	1.01458	58.1309
117	e16wt_h2bgfp_ecad036.nd2	11.74	8.59	8	0	0	0			0.681431	0.749716	42.9556
118	e16wt_h2bgfp_ecad037.nd2	9.48	9.42	1	0	0	0			0.105485	0.105682	6.05512
119	e16wt_h2bgfp_ecad037.nd2	8.09	8.07	0.5	0	0	0			0.0618047	0.0618441	3.54341
120	e16wt_h2bgfp_ecad037.nd2	7.29	7.14	1.5	0	0	0			0.205761	0.207242	11.8741
121	e16wt_h2bgfp_ecad037.nd2	8.45	7.16	4.5	0	0	0			0.532544	0.561604	32.1775
122	e16wt_h2bgfp_ecad037.nd2	7.95	7.14	3.5	0	0	0			0.440252	0.455879	26.1199
123	e16wt_h2bgfp_ecad038.nd2	6.11	6.11	0	0	0	0			0	0	0
124	e16wt_h2bgfp_ecad038.nd2	7.63	6.17	4.5	0	0	0			0.589777	0.630783	36.1412
125	e16wt_h2bgfp_ecad038.nd2	8.94	2.76	8.5	0	0	0			0.950783	1.25575	71.9494
126	e16wt_h2bgfp_ecad039.nd2	6.89	6.89	0	0	0	0			0	0	0
127	e16wt_h2bgfp_ecad039.nd2	8.66	8.6	1	0	0	0			0.115473	0.115732	6.63093
128	e16wt_h2bgfp_ecad039.nd2	5.7	5.68	0.5	0	0	0			0.0877193	0.0878322	5.03241
129	e16wt_h2bgfp_ecad039.nd2	7.08	2.8	6.5	0	0	0			0.918079	1.16321	66.6469
130	e16wt_h2bgfp_ecad039.nd2	7.45	3.63	6.5	0	0	0			0.872483	1.06026	60.7485
131	e16wt_h2bgfp_ecad040.nd2	6.71	3	6	0	0	0			0.894188	1.10661	63.4043
132	e16wt_h2bgfp_ecad040.nd2	9.59	7.48	6	0	0	0			0.625652	0.675967	38.73
Item	Source	Length xyz	Length xy	Height	ND.T	ND.Z	ND.M	Comment		sin theta	angle_radians	angle_degrees
1	e16Lp_h2bgfp_ecad.nd2	9.57	9.52	1	0	0	0			0.104493	0.104684	5.99797
2	e16Lp_h2bgfp_ecad.nd2	12.28	10.09	7	0	0	0			0.570033	0.606545	34.7525
3	e16Lp_h2bgfp_ecad001.nd2	7.32	7.3	0.5	0	0	0			0.068306	0.0683592	3.9167
4	e16Lp_h2bgfp_ecad002.nd2	12.67	2.08	12.5	0	0	0			0.986582	1.4068	80.6036
5	e16Lp_h2bgfp_ecad003.nd2	9.52	9.31	2	0	0	0			0.210084	0.211661	12.1273
6	e16Lp_h2bgfp_ecad003.nd2	9.65	9.44	2	0	0	0			0.207254	0.208767	11.9615
7	e16Lp_h2bgfp_ecad003.nd2	5.01	4.78	1.5	0	0	0			0.299401	0.304065	17.4216
8	e16Lp_h2bgfp_ecad003.nd2	4.78	4.54	1.5	0	0	0			0.313808	0.3192	18.2888
9	e16Lp_h2bgfp_ecad003.nd2	9.16	1.71	9	0	0	0			0.982533	1.38362	79.2753
10	e16Lp_h2bgfp_ecad003.nd2	9.95	2.96	9.5	0	0	0			0.954774	1.2689	72.7025
11	e16Lp_h2bgfp_ecad003.nd2	8.61	3.18	8	0	0	0			0.929152	1.19211	68.303
12	e16Lp_h2bgfp_ecad004.nd2	9.03	8.91	1.5	0	0	0			0.166113	0.166887	9.56189
13	e16Lp_h2bgfp_ecad004.nd2	8.65	6.23	6	0	0	0			0.693642	0.766532	43.9191
14	e16Lp_h2bgfp_ecad004.nd2	9.7	1.97	9.5	0	0	0			0.979381	1.36738	78.3449
15	e16Lp_h2bgfp_ecad005.nd2	5.04	5.02	0.5	0	0	0			0.0992063	0.0993698	5.69347
16	e16Lp_h2bgfp_ecad005.nd2	7.53	3.81	6.5	0	0	0			0.863214	1.0416	59.6794
17	e16Lp_h2bgfp_ecad005.nd2	8.88	2.57	8.5	0	0	0			0.957207	1.27719	73.1778
18	e16Lp_h2bgfp_ecad006.nd2	7.87	7.73	1.5	0	0	0			0.190597	0.19177	10.9876
19	e16Lp_h2bgfp_ecad007.nd2	6.1	5.92	1.5	0	0	0			0.245902	0.24845	14.2351
20	e16Lp_h2bgfp_ecad008.nd2	8.09	7.95	1.5	0	0	0			0.185414	0.186493	10.6853
21	e16Lp_h2bgfp_ecad008.nd2	8.34	8.28	1	0	0	0			0.119904	0.120193	6.88657
22	e16Lp_h2bgfp_ecad008.nd2	7.82	7.82	0	0	0	0			0	0	0
23	e16Lp_h2bgfp_ecad008.nd2	10.34	10.33	0.5	0	0	0			0.0483559	0.0483748	2.77167
24	e16Lp_h2bgfp_ecad008.nd2	7.46	5.04	5.5	0	0	0			0.737265	0.829014	47.499
25	e16Lp_h2bgfp_ecad008.nd2	8.5	5.47	6.5	0	0	0			0.764706	0.870585	49.8808
26	e16Lp_h2bgfp_ecad010.nd2	8.25	8.11	1.5	0	0	0			0.181818	0.182835	10.4757
27	e16Lp_h2bgfp_ecad010.nd2	9.03	8.91	1.5	0	0	0			0.166113	0.166887	9.56189
28	e16Lp_h2bgfp_ecad010.nd2	8.6	8.22	2.5	0	0	0			0.290698	0.294956	16.8997
29	e16Lp_h2bgfp_ecad011.nd2	6.84	6.84	0	0	0	0			0	0	0
30	e16Lp_h2bgfp_ecad011.nd2	7.96	7.82	1.5	0	0	0			0.188442	0.189576	10.8619
31	e16Lp_h2bgfp_ecad012.nd2	9.44	6.84	6.5	0	0	0			0.688559	0.759501	43.5162
32	e16Lp_h2bgfp_ecad012.nd2	11.53	0.77	11.5	0	0	0			0.997398	1.49864	85.8659
33	e16Lp_h2bgfp_ecad013.nd2	7.52	7.25	2	0	0	0			0.265957	0.269197	15.4239
34	e16Lp_h2bgfp_ecad013.nd2	8.21	3.34	7.5	0	0	0			0.91352	1.15185	65.9964
35	e16Lp_h2bgfp_ecad014.nd2	7.32	7.04	2	0	0	0			0.273224	0.276743	15.8562
36	e16Lp_h2bgfp_ecad014.nd2	7.85	7.83	0.5	0	0	0			0.0636943	0.0637374	3.65188
37	e16Lp_h2bgfp_ecad014.nd2	6.89	6.89	0	0	0	0			0	0	0
38	e16Lp_h2bgfp_ecad014.nd2	8.76	2.11	8.5	0	0	0			0.97032	1.32655	76.0057
39	e16Lp_h2bgfp_ecad016.nd2	9.45	9.12	2.5	0	0	0			0.26455	0.267738	15.3402
40	e16Lp_h2bgfp_ecad017.nd2	12.52	12.48	1	0	0	0			0.0798722	0.0799574	4.58122
41	e16Lp_h2bgfp_ecad017.nd2	10.6	10.5	1.5	0	0	0			0.141509	0.141986	8.1352
42	e16Lp_h2bgfp_ecad017.nd2	9.21	9.2	0.5	0	0	0			0.0542888	0.0543155	3.11205
43	e16Lp_h2bgfp_ecad017.nd2	9.53	0.77	9.5	0	0	0			0.996852	1.49143	85.4526
44	e16Lp_h2bgfp_ecad018.nd2	6.83	2.09	6.5	0	0	0			0.951684	1.25867	72.1167
45	e16Lp_h2bgfp_ecad018.nd2	9.08	7.22	5.5	0	0	0			0.605727	0.650679	37.2812
46	e16Lp_h2bgfp_ecad019.nd2	9.43	8.75	3.5	0	0	0			0.371156	0.380254	21.7869
47	e16Lp_h2bgfp_ecad019.nd2	9.43	9.42	0.5	0	0	0			0.0530223	0.0530471	3.03938
48	e16Lp_h2bgfp_ecad019.nd2	8.64	7.04	5	0	0	0			0.578704	0.617138	35.3594
49	e16Lp_h2bgfp_ecad019.nd2	9.97	4.3	9	0	0	0			0.902708	1.12602	64.5164
50	e16Lp_h2bgfp_ecad019.nd2	9.19	3.5	8.5	0	0	0			0.924918	1.18082	67.6561
51	e16Lp_h2bgfp_ecad020.nd2	8.79	8.67	1.5	0	0	0			0.170648	0.171488	9.82552
52	e16Lp_h2bgfp_ecad020.nd2	11.72	11.32	3	0	0	0			0.255973	0.258854	14.8312
53	e16Lp_h2bgfp_ecad020.nd2	5.96	2.31	5.5	0	0	0			0.922819	1.17533	67.3417
54	e16Lp_h2bgfp_ecad020.nd2	9.17	1.76	9	0	0	0			0.981461	1.37794	78.9503
55	e16Lp_h2bgfp_ecad020.nd2	9.6	1.35	9.5	0	0	0			0.989583	1.42633	81.7229
56	e16Lp_h2bgfp_ecad021.nd2	7.54	2.79	7	0	0	0			0.928382	1.19003	68.184
57	e16Lp_h2bgfp_ecad022.nd2	9.1	7.25	5.5	0	0	0			0.604396	0.649007	37.1854
58	e16lp_h2bgfp_ecad023.nd2	11.86	11.86	0	0	0	0			0	0	0
59	e16lp_h2bgfp_ecad023.nd2	11.74	11.74	0	0	0	0			0	0	0
60	e16lp_h2bgfp_ecad023.nd2	10.04	3.25	9.5	0	0	0			0.946215	1.24133	71.123
61	e16lp_h2bgfp_ecad024.nd2	7.68	7.61	1	0	0	0			0.130208	0.130579	7.48163
62	e16lp_h2bgfp_ecad024.nd2	7.15	4.56	5.5	0	0	0			0.769231	0.877636	50.2849
63	e16lp_h2bgfp_ecad024.nd2	6.14	4.65	4	0	0	0			0.651466	0.709515	40.6522
64	e16lp_h2bgfp_ecad025.nd2	8.52	8.29	2	0	0	0			0.234742	0.236953	13.5764
65	e16lp_h2bgfp_ecad025.nd2	7.17	7.1	1	0	0	0			0.13947	0.139926	8.01718
66	e16lp_h2bgfp_ecad025.nd2	9.87	9.87	0	0	0	0			0	0	0
67	e16lp_h2bgfp_ecad025.nd2	7.83	7.81	0.5	0	0	0			0.063857	0.0639004	3.66123
68	e16lp_h2bgfp_ecad026.nd2	8.25	7.86	2.5	0	0	0			0.30303	0.307871	17.6397
69	e16lp_h2bgfp_ecad026.nd2	8.24	1.98	8	0	0	0			0.970874	1.32885	76.1376
70	e16lp_h2bgfp_ecad027.nd2	10.08	10.03	1	0	0	0			0.0992063	0.0993698	5.69347
71	e16lp_h2bgfp_ecad027.nd2	8.84	8.78	1	0	0	0			0.113122	0.113365	6.49533
72	e16lp_h2bgfp_ecad027.nd2	6.48	5.98	2.5	0	0	0			0.385802	0.396077	22.6936
73	e16lp_h2bgfp_ecad027.nd2	8.45	8.44	0.5	0	0	0			0.0591716	0.0592062	3.39226
74	e16lp_h2bgfp_ecad027.nd2	7.45	2.54	7	0	0	0			0.939597	1.22145	69.984
75	e16lp_h2bgfp_ecad028.nd2	7.57	7.3	2	0	0	0			0.264201	0.267375	15.3195
76	e16lp_h2bgfp_ecad028.nd2	10.17	10.12	1	0	0	0			0.0983284	0.0984876	5.64292
77	e16lp_h2bgfp_ecad028.nd2	8.39	2.54	8	0	0	0			0.953516	1.2647	72.4618
78	e16lp_h2bgfp_ecad028.nd2	8.29	2.18	8	0	0	0			0.965018	1.30551	74.8003
79	e16lp_h2bgfp_ecad029.nd2	8.8	8.78	0.5	0	0	0			0.0568182	0.0568488	3.2572
80	e16lp_h2bgfp_ecad029.nd2	7.43	7.43	0	0	0	0			0	0	0
81	e16lp_h2bgfp_ecad029.nd2	10.17	3.63	9.5	0	0	0			0.93412	1.20579	69.0864
82	e16lp_h2bgfp_ecad031.nd2	6.91	6.83	1	0	0	0			0.144718	0.145228	8.32094
83	e16lp_h2bgfp_ecad031.nd2	8.98	8.92	1	0	0	0			0.111359	0.11159	6.39364
84	e16lp_h2bgfp_ecad031.nd2	10.15	8.18	6	0	0	0			0.591133	0.632463	36.2375
85	e16lp_h2bgfp_ecad031.nd2	9.6	5.99	7.5	0	0	0			0.78125	0.896666	51.3752
86	e16lp_h2bgfp_ecad032.nd2	10.48	10.47	0.5	0	0	0			0.0477099	0.047728	2.73462
87	e16lp_h2bgfp_ecad032.nd2	8.71	8.58	1.5	0	0	0			0.172216	0.173079	9.91668
88	e16lp_h2bgfp_ecad032.nd2	8.48	7.93	3	0	0	0			0.353774	0.361603	20.7183
89	e16lp_h2bgfp_ecad032.nd2	10.27	3.91	9.5	0	0	0			0.925024	1.1811	67.672
90	e16lp_h2bgfp_ecad032.nd2	10.87	7.87	7.5	0	0	0			0.689972	0.761451	43.6279
91	e16lp_h2bgfp_ecad033.nd2	12.11	3.79	11.5	0	0	0			0.949628	1.25205	71.7371
92	e16lp_h2bgfp_ecad033.nd2	10.62	1.62	10.5	0	0	0			0.988701	1.42033	81.3786
93	e16lp_h2bgfp_ecad034.nd2	9.48	9.43	1	0	0	0			0.105485	0.105682	6.05512
94	e16lp_h2bgfp_ecad034.nd2	8.16	8.14	0.5	0	0	0			0.0612745	0.0613129	3.51297
95	e16lp_h2bgfp_ecad034.nd2	11.91	3.08	11.5	0	0	0			0.965575	1.30765	74.9226
96	e16lp_h2bgfp_ecad034.nd2	13.21	2.34	13	0	0	0			0.984103	1.39225	79.7701
97	e16lp_h2bgfp_ecad035.nd2	8.17	7.13	4	0	0	0			0.489596	0.511626	29.314
98	e16lp_h2bgfp_ecad035.nd2	9.42	2.78	9	0	0	0			0.955414	1.27106	72.8263
99	e16lp_h2bgfp_ecad036.nd2	8.39	8.33	1	0	0	0			0.11919	0.119474	6.84533
100	e16lp_h2bgfp_ecad036.nd2	6.51	6.51	0	0	0	0			0	0	0
101	e16lp_h2bgfp_ecad036.nd2	5.49	4.6	3	0	0	0			0.546448	0.578117	33.1237
102	e16lp_h2bgfp_ecad036.nd2	8.97	8.03	4	0	0	0			0.445931	0.462214	26.4829
103	e16lp_h2bgfp_ecad038.nd2	9.32	9.31	0.5	0	0	0			0.0536481	0.0536738	3.07528
104	e16lp_h2bgfp_ecad038.nd2	9	8.99	0.5	0	0	0			0.0555556	0.0555842	3.18474
105	e16lp_h2bgfp_ecad038.nd2	8.81	8.75	1	0	0	0			0.113507	0.113753	6.51754
106	e16lp_h2bgfp_ecad038.nd2	4.91	4.89	0.5	0	0	0			0.101833	0.10201	5.84473
107	e16lp_h2bgfp_ecad038.nd2	6.42	5.68	3	0	0	0			0.46729	0.486223	27.8585
108	e16lp_h2bgfp_ecad038.nd2	10.07	1.17	10	0	0	0			0.993049	1.45282	83.2404
109	e16lp_h2bgfp_ecad039.nd2	9.61	9.56	1	0	0	0			0.104058	0.104247	5.97291
110	e16lp_h2bgfp_ecad039.nd2	7.87	7.87	0	0	0	0			0	0	0
111	e16lp_h2bgfp_ecad039.nd2	8.66	8.53	1.5	0	0	0			0.17321	0.174088	9.97452
112	e16lp_h2bgfp_ecad039.nd2	8.41	4.65	7	0	0	0			0.832342	0.983321	56.3401
113	e16lp_h2bgfp_ecad040.nd2	10.01	7.16	7	0	0	0			0.699301	0.774419	44.3709
114	e16lp_h2bgfp_ecad041.nd2	6.7	5.38	4	0	0	0			0.597015	0.639775	36.6564
115	e16lp_h2bgfp_ecad041.nd2	5.29	3.45	4	0	0	0			0.756144	0.8574	49.1254
