# Supplementary material for: Epithelial geometry regulates spindle orientation and progenitor fate during formation of the mammalian epidermis
Source: eLife journal article supplement (doi:10.7554/elife.47102), 2019-06-12
Supplement: supp [file LiveDivisionAngles.xlsx]

## Sheet: E14WTLive
ID	Item Name	Name	Population	Timepoint	Abs. Time	Rel. Time (s)	Type	Total Line Length (um)	Angle (degrees)	Bearing (degrees)	Elevation (degrees)	Start Position X	Start Position Y	Start Position Z	End Position X	End Position Y	End Position Z	Line Width (um)	Parent ID	Intensity	Distance (um)	Distance	Normalized Distance		line_length_um	division_angle_degrees	division_angles
1	1278 (registration corrected) (cropped) (spliced)	Lines 1	Lines	98	-1:-1:-1.691 on	58200	Line	10.78	90	90	2.6	69.84	44.31	31	80.43	44.31	33	0	N/A	N/A	N/A	N/A	N/A		10.7772	10.6948	10.6948
2	1278 (registration corrected) (cropped) (spliced)	Lines 2	Lines	110	-1:-1:-1.691 on	65400	Line	10.65	38.53	38.45	2.64	35.64	27.45	32	42.14	19.27	34	0	N/A	N/A	N/A	N/A	N/A		10.6378	10.8366	10.8366
3	1278 (registration corrected) (cropped) (spliced)	Lines 3	Lines	110	-1:-1:-1.691 on	65400	Line	10.86	159.7	163.14	11.48	32.51	40.46	28	34.92	48.4	35	0	N/A	N/A	N/A	N/A	N/A		10.856	40.1512	40.1512
4	1278 (registration corrected) (cropped) (spliced)	Lines 1	Lines	141	-1:-1:-1.691 on	84000	Line	9.04	104.01	104.62	-16.41	68.39	53.7	35	73.93	55.15	28	0	N/A	N/A	N/A	N/A	N/A		9.04401	-50.7138	50.7138
5	1278 (registration corrected) (cropped) (spliced)	Lines 2	Lines	141	-1:-1:-1.691 on	84000	Line	9.65	48.12	313.53	-14.24	37.81	17.82	37	32.99	13.25	30	0	N/A	N/A	N/A	N/A	N/A		9.64973	-46.5029	46.5029
6	1278 (registration corrected) (cropped) (spliced)	Lines 3	Lines	141	-1:-1:-1.691 on	84000	Line	9.95	129.93	129.99	-2.83	66.95	18.54	35	74.41	24.8	33	0	N/A	N/A	N/A	N/A	N/A		9.94179	-11.6054	11.6054
7	1278 (registration corrected) (cropped) (spliced)	Lines 1	Lines	101	-1:-1:-1.691 on	60000	Line	9.21	125.35	125.36	1.51	40.94	29.14	22	48.4	34.44	23	0	N/A	N/A	N/A	N/A	N/A		9.20552	6.23637	6.23637
8	1278 (registration corrected) (cropped) (spliced)	Lines 2	Lines	101	-1:-1:-1.691 on	60000	Line	10.41	30.76	30.74	-1.33	24.32	21.43	22	29.62	12.52	21	0	N/A	N/A	N/A	N/A	N/A		10.4153	-5.50961	5.50961
9	1278 (registration corrected) (cropped) (spliced)	Lines 3	Lines	101	-1:-1:-1.691 on	60000	Line	9.6	90	90	2.94	90.55	61.89	33	99.94	61.89	35	0	N/A	N/A	N/A	N/A	N/A		9.60063	12.0239	12.0239
10	1278 (registration corrected) (cropped) (spliced)	Lines 4	Lines	101	-1:-1:-1.691 on	60000	Line	9.8	17.75	17.53	2.87	112.94	69.12	30	115.83	59.96	32	0	N/A	N/A	N/A	N/A	N/A		9.8111	11.7622	11.7622
11	1278 (registration corrected) (cropped) (spliced)	Lines 1	Lines	91	-1:-1:-1.691 on	54000	Line	9.4	90	90	4.64	113.67	47.92	30	122.58	47.92	33	0	N/A	N/A	N/A	N/A	N/A		9.40149	18.6084	18.6084
12	1278 (registration corrected) (cropped) (spliced)	Lines 2	Lines	91	-1:-1:-1.691 on	54000	Line	9.54	156	156.04	-1.45	99.46	28.18	25	103.31	36.85	24	0	N/A	N/A	N/A	N/A	N/A		9.53894	-6.01757	6.01757
13	1278 (registration corrected) (cropped) (spliced)	Lines 3	Lines	91	-1:-1:-1.691 on	54000	Line	7.73	158.92	159.23	-3.69	139.68	54.43	29	142.33	61.41	27	0	N/A	N/A	N/A	N/A	N/A		7.72935	-14.9961	14.9961
14	1278 (registration corrected) (cropped) (spliced)	Lines 4	Lines	91	-1:-1:-1.691 on	54000	Line	9.46	104.74	104.74	0	115.11	25.29	24	124.26	27.69	24	0	N/A	N/A	N/A	N/A	N/A		9.45952	0	0
15	1278 (registration corrected) (cropped) (spliced)	Lines 5	Lines	91	-1:-1:-1.691 on	54000	Line	8.37	12.44	11.98	-3.39	96.09	21.43	24	97.77	13.49	22	0	N/A	N/A	N/A	N/A	N/A		8.35859	-13.8437	13.8437
16	1278 (registration corrected) (cropped) (spliced)	Lines 1	Lines	123	-1:-1:-1.691 on	73200	Line	7.84	90	90	-8.13	96.33	13.25	33	103.07	13.25	29	0	N/A	N/A	N/A	N/A	N/A		7.83758	-30.6879	30.6879
17	1278 (registration corrected) (cropped) (spliced)	Lines 2	Lines	123	-1:-1:-1.691 on	73200	Line	12.6	90	90	-36.87	98.5	21.43	38	102.35	21.43	26	0	N/A	N/A	N/A	N/A	N/A		12.6025	-72.212	72.212
18	1278 (registration corrected) (cropped) (spliced)	Lines 1	Lines	136	-1:-1:-1.691 on	81000	Line	7.15	29.5	21.8	-20.37	111.98	41.18	35	113.43	37.57	29	0	N/A	N/A	N/A	N/A	N/A		7.15085	-57.0412	57.0412
19	1278 (registration corrected) (cropped) (spliced)	Lines 2	Lines	136	-1:-1:-1.691 on	81000	Line	7.66	130.58	131.63	-11.73	79.95	59.24	33	84.29	63.1	28	0	N/A	N/A	N/A	N/A	N/A		7.66389	-40.7236	40.7236
20	1278 (registration corrected) (cropped) (spliced)	Lines 3	Lines	136	-1:-1:-1.691 on	81000	Line	7.08	74.06	74.05	1.97	126.19	67.19	34	132.93	65.26	35	0	N/A	N/A	N/A	N/A	N/A		7.08184	8.11765	8.11765
21	1278 (registration corrected) (cropped) (spliced)	Lines 4	Lines	136	-1:-1:-1.691 on	81000	Line	8.35	90	90	-38.66	145.21	47.68	36	147.62	47.68	28	0	N/A	N/A	N/A	N/A	N/A		8.35512	-73.2351	73.2351
22	1278 (registration corrected) (cropped) (spliced)	Lines 1	Lines	100	-1:-1:-1.691 on	59400	Line	7.91	61.88	61.82	3.6	124.99	54.67	32	131.73	51.05	34	0	N/A	N/A	N/A	N/A	N/A		7.90772	14.6502	14.6502
23	1278 (registration corrected) (cropped) (spliced)	Lines 2	Lines	100	-1:-1:-1.691 on	59400	Line	8.49	90	90	-5.19	104.03	26.73	35	111.98	26.73	32	0	N/A	N/A	N/A	N/A	N/A		8.49721	-20.6744	20.6744
24	1278 (registration corrected) (cropped) (spliced)	Lines 3	Lines	100	-1:-1:-1.691 on	59400	Line	6.9	119.25	119.25	0	211.2	20.23	32	217.22	23.6	32	0	N/A	N/A	N/A	N/A	N/A		6.89908	0	0
25	1278 (registration corrected) (cropped) (spliced)	Lines 4	Lines	100	-1:-1:-1.691 on	59400	Line	8.96	30.7	30.7	0	230.71	57.8	24	235.28	50.09	24	0	N/A	N/A	N/A	N/A	N/A		8.96264	0	0
26	1278 (registration corrected) (cropped) (spliced)	Lines 5	Lines	100	-1:-1:-1.691 on	59400	Line	8.9	176.82	180	-3.18	203.73	11.56	27	203.73	20.23	25	0	N/A	N/A	N/A	N/A	N/A		8.89769	-12.9898	12.9898
27	1278 (registration corrected) (cropped) (spliced)	Lines 6	Lines	100	-1:-1:-1.691 on	59400	Line	9.22	157.01	183.01	22.81	199.4	41.9	27	199.16	46.48	35	0	N/A	N/A	N/A	N/A	N/A		9.22139	60.175	60.175
28	1278 (registration corrected) (cropped) (spliced)	Lines 1	Lines	141	-1:-1:-1.691 on	84000	Line	7.8	38.44	37.69	8.19	199.88	34.92	32	203.98	29.62	36	0	N/A	N/A	N/A	N/A	N/A		7.80385	30.835	30.835
29	1278 (registration corrected) (cropped) (spliced)	Lines 2	Lines	141	-1:-1:-1.691 on	84000	Line	6.82	90	90	2.05	203.98	21.67	23	210.72	21.67	24	0	N/A	N/A	N/A	N/A	N/A		6.81378	8.43929	8.43929
30	1278 (registration corrected) (cropped) (spliced)	Lines 3	Lines	141	-1:-1:-1.691 on	84000	Line	7.73	46.3	46.27	1.8	234.8	26.25	23	240.34	20.95	24	0	N/A	N/A	N/A	N/A	N/A		7.73186	7.43117	7.43117
31	1278 (registration corrected) (cropped) (spliced)	Lines 4	Lines	141	-1:-1:-1.691 on	84000	Line	8.49	90	90	-1.64	213.61	19.27	32	222.04	19.27	31	0	N/A	N/A	N/A	N/A	N/A		8.4891	-6.76504	6.76504
32	1278 (registration corrected) (cropped) (spliced)	Lines 1	Lines	91	-1:-1:-1.691 on	54000	Line	10.47	23.03	23.03	0	6.74	79.95	30	10.84	70.32	30	0	N/A	N/A	N/A	N/A	N/A		10.4665	0	0
33	1278 (registration corrected) (cropped) (spliced)	Lines 2	Lines	91	-1:-1:-1.691 on	54000	Line	10.27	46.92	313.09	-1.35	45.03	75.86	35	37.57	68.87	34	0	N/A	N/A	N/A	N/A	N/A		10.2719	-5.58677	5.58677
34	1278 (registration corrected) (cropped) (spliced)	Lines 3	Lines	91	-1:-1:-1.691 on	54000	Line	10.64	90	90	7.31	0.722	111.74	32	10.11	111.74	37	0	N/A	N/A	N/A	N/A	N/A		10.6365	28.0395	28.0395
35	1278 (registration corrected) (cropped) (spliced)	Lines 4	Lines	91	-1:-1:-1.691 on	54000	Line	9.76	15.75	15.75	0	1.44	91.27	25	4.09	81.88	25	0	N/A	N/A	N/A	N/A	N/A		9.75677	0	0
36	1278 (registration corrected) (cropped) (spliced)	Lines 1	Lines	133	-1:-1:-1.691 on	79200	Line	8.25	61.94	298.07	-1.68	36.12	97.29	27	28.9	93.44	26	0	N/A	N/A	N/A	N/A	N/A		8.24323	-6.96781	6.96781
37	1278 (registration corrected) (cropped) (spliced)	Lines 2	Lines	133	-1:-1:-1.691 on	79200	Line	7.99	90	270	-23.63	66.95	107.89	38	63.1	107.89	31	0	N/A	N/A	N/A	N/A	N/A		7.9889	-61.1892	61.1892
38	1278 (registration corrected) (cropped) (spliced)	Lines 3	Lines	133	-1:-1:-1.691 on	79200	Line	11.84	90	90	1.17	68.63	111.02	32	80.43	111.02	33	0	N/A	N/A	N/A	N/A	N/A		11.8423	4.844	4.844
39	1278 (registration corrected) (cropped) (spliced)	Lines 1	Lines	84	-1:-1:-1.691 on	49800	Line	9.32	90	270	-41.99	124.99	91.51	39	122.58	91.51	30	0	N/A	N/A	N/A	N/A	N/A		9.31709	-75.0092	75.0092
40	1278 (registration corrected) (cropped) (spliced)	Lines 2	Lines	84	-1:-1:-1.691 on	49800	Line	8.66	72.08	72.07	-1.6	128.84	69.84	27	137.03	67.19	26	0	N/A	N/A	N/A	N/A	N/A		8.66594	-6.62636	6.62636
41	1278 (registration corrected) (cropped) (spliced)	Lines 3	Lines	84	-1:-1:-1.691 on	49800	Line	7.5	53.23	306.87	-3.81	132.21	73.93	34	126.43	69.6	32	0	N/A	N/A	N/A	N/A	N/A		7.49382	-15.4791	15.4791
42	1278 (registration corrected) (cropped) (spliced)	Lines 4	Lines	84	-1:-1:-1.691 on	49800	Line	11.21	59.13	301.5	-10.9	93.44	76.58	36	85.97	72.01	29	0	N/A	N/A	N/A	N/A	N/A		11.211	-38.6373	38.6373
43	1278 (registration corrected) (cropped) (spliced)	Lines 1	Lines	106	-1:-1:-1.691 on	63000	Line	9.61	90	270	-32.74	94.64	114.15	41	91.27	114.15	32	0	N/A	N/A	N/A	N/A	N/A		9.61025	-69.4719	69.4719
44	1278 (registration corrected) (cropped) (spliced)	Lines 2	Lines	106	-1:-1:-1.691 on	63000	Line	9.83	122.31	232.43	-28.76	206.87	89.1	33	203.73	91.51	24	0	N/A	N/A	N/A	N/A	N/A		9.83197	-66.2599	66.2599
45	1278 (registration corrected) (cropped) (spliced)	Lines 3	Lines	106	-1:-1:-1.691 on	63000	Line	6.63	19.09	19.09	0	217.22	73.45	25	219.39	67.19	25	0	N/A	N/A	N/A	N/A	N/A		6.62544	0	0
46	1278 (registration corrected) (cropped) (spliced)	Lines 4	Lines	106	-1:-1:-1.691 on	63000	Line	10.46	90	270	-15.95	212.16	105.72	34	205.42	105.72	26	0	N/A	N/A	N/A	N/A	N/A		10.4608	-49.8859	49.8859
47	1278 (registration corrected) (cropped) (spliced)	Lines 1	Lines	117	-1:-1:-1.691 on	69600	Line	8.01	90	270	-75.96	229.26	78.75	34	228.78	78.75	26	0	N/A	N/A	N/A	N/A	N/A		8.01439	-86.5664	86.5664
48	1278 (registration corrected) (cropped) (spliced)	Lines 2	Lines	117	-1:-1:-1.691 on	69600	Line	8.99	90	90	-25.2	234.32	88.62	34	238.41	88.62	26	0	N/A	N/A	N/A	N/A	N/A		8.98488	-62.9216	62.9216
49	1278 (registration corrected) (cropped) (spliced)	Lines 3	Lines	117	-1:-1:-1.691 on	69600	Line	9.87	90	90	-18.43	188.8	87.42	36	194.58	87.42	28	0	N/A	N/A	N/A	N/A	N/A		9.86957	-54.1519	54.1519
50	1278 (registration corrected) (cropped) (spliced)	Lines 4	Lines	117	-1:-1:-1.691 on	69600	Line	9.21	90	270	-11.69	222.76	108.13	32	215.78	108.13	26	0	N/A	N/A	N/A	N/A	N/A		9.20437	-40.6823	40.6823
51	1278 (registration corrected) (cropped) (spliced)	Lines 1	Lines	76	-1:-1:-1.691 on	45000	Line	8.6	11.31	11.31	0	11.32	131.97	36	13	123.54	36	0	N/A	N/A	N/A	N/A	N/A		8.59577	0	0
52	1278 (registration corrected) (cropped) (spliced)	Lines 2	Lines	76	-1:-1:-1.691 on	45000	Line	7.32	46.33	313.67	0	21.91	170.98	30	16.62	165.93	30	0	N/A	N/A	N/A	N/A	N/A		7.31345	0	0
53	1278 (registration corrected) (cropped) (spliced)	Lines 3	Lines	76	-1:-1:-1.691 on	45000	Line	11.51	77.75	77.74	-2.43	66.23	188.32	29	77.3	185.91	27	0	N/A	N/A	N/A	N/A	N/A		11.5045	-10.0115	10.0115
54	1278 (registration corrected) (cropped) (spliced)	Lines 4	Lines	76	-1:-1:-1.691 on	45000	Line	9.74	81.47	81.47	0	38.53	186.15	37	48.16	184.71	37	0	N/A	N/A	N/A	N/A	N/A		9.73707	0	0
55	1278 (registration corrected) (cropped) (spliced)	Lines 1	Lines	86	-1:-1:-1.691 on	51000	Line	9.81	164.19	195.75	-1.41	15.65	180.62	38	13	190.01	37	0	N/A	N/A	N/A	N/A	N/A		9.80788	-5.85198	5.85198
56	1278 (registration corrected) (cropped) (spliced)	Lines 2	Lines	86	-1:-1:-1.691 on	51000	Line	10.39	140.76	218.88	-5.74	82.6	146.18	38	76.58	153.64	34	0	N/A	N/A	N/A	N/A	N/A		10.3871	-22.6495	22.6495
57	1278 (registration corrected) (cropped) (spliced)	Lines 3	Lines	86	-1:-1:-1.691 on	51000	Line	7.23	104	104.04	3.96	4.58	195.06	36	11.32	196.75	38	0	N/A	N/A	N/A	N/A	N/A		7.23075	16.0572	16.0572
58	1278 (registration corrected) (cropped) (spliced)	Lines 4	Lines	86	-1:-1:-1.691 on	51000	Line	7.95	54.87	305.13	0	84.53	186.88	28	78.03	182.3	28	0	N/A	N/A	N/A	N/A	N/A		7.9515	0	0
59	1278 (registration corrected) (cropped) (spliced)	Lines 1	Lines	103	-1:-1:-1.691 on	61200	Line	9.26	90	270	-45	70.56	155.09	41	68.39	155.09	32	0	N/A	N/A	N/A	N/A	N/A		9.25791	-76.4441	76.4441
60	1278 (registration corrected) (cropped) (spliced)	Lines 2	Lines	103	-1:-1:-1.691 on	61200	Line	6.3	90	90	-36.87	76.1	164.48	39	78.03	164.48	33	0	N/A	N/A	N/A	N/A	N/A		6.30277	-72.1687	72.1687
61	1278 (registration corrected) (cropped) (spliced)	Lines 3	Lines	103	-1:-1:-1.691 on	61200	Line	8.88	90	270	-26.57	69.12	181.58	43	65.26	181.58	35	0	N/A	N/A	N/A	N/A	N/A		8.88254	-64.2427	64.2427
62	1278 (registration corrected) (cropped) (spliced)	Lines 1	Lines	124	-1:-1:-1.691 on	73800	Line	10.7	90	270	-20.56	23.36	170.98	41	17.58	170.98	32	0	N/A	N/A	N/A	N/A	N/A		10.6962	-57.2905	57.2905
63	1278 (registration corrected) (cropped) (spliced)	Lines 2	Lines	124	-1:-1:-1.691 on	73800	Line	9.76	23.43	23.39	-1.42	25.53	184.47	37	29.38	175.56	36	0	N/A	N/A	N/A	N/A	N/A		9.75759	-5.88225	5.88225
64	1278 (registration corrected) (cropped) (spliced)	Lines 3	Lines	124	-1:-1:-1.691 on	73800	Line	8.19	12.09	348.02	-1.7	16.86	186.64	38	15.17	178.69	37	0	N/A	N/A	N/A	N/A	N/A		8.18893	-7.01424	7.01424
65	1278 (registration corrected) (cropped) (spliced)	Lines 4	Lines	124	-1:-1:-1.691 on	73800	Line	7.25	50.47	309.56	-1.92	10.84	132.69	36	5.3	128.12	35	0	N/A	N/A	N/A	N/A	N/A		7.25097	-7.92708	7.92708
66	1278 (registration corrected) (cropped) (spliced)	Lines 5	Lines	124	-1:-1:-1.691 on	73800	Line	9.54	10.18	349.82	0	69.36	192.17	38	67.67	182.78	38	0	N/A	N/A	N/A	N/A	N/A		9.54087	0	0
67	1278 (registration corrected) (cropped) (spliced)	Lines 1	Lines	96	-1:-1:-1.691 on	57000	Line	10.83	66.3	66.3	-1.28	119.45	168.57	31	129.32	164.24	30	0	N/A	N/A	N/A	N/A	N/A		10.8243	-5.30081	5.30081
68	1278 (registration corrected) (cropped) (spliced)	Lines 2	Lines	96	-1:-1:-1.691 on	57000	Line	8.89	154.09	154.13	1.56	118	151.24	37	121.86	159.18	38	0	N/A	N/A	N/A	N/A	N/A		8.885	6.46229	6.46229
69	1278 (registration corrected) (cropped) (spliced)	Lines 3	Lines	96	-1:-1:-1.691 on	57000	Line	11.73	90	90	-2.39	81.16	169.3	36	92.72	169.3	34	0	N/A	N/A	N/A	N/A	N/A		11.7317	-9.8156	9.8156
70	1278 (registration corrected) (cropped) (spliced)	Lines 4	Lines	96	-1:-1:-1.691 on	57000	Line	9.3	158.75	158.75	0	86.7	138.47	28	90.07	147.14	28	0	N/A	N/A	N/A	N/A	N/A		9.30192	0	0
71	1278 (registration corrected) (cropped) (spliced)	Lines 5	Lines	96	-1:-1:-1.691 on	57000	Line	8.99	90	90	25.2	120.17	164.48	34	124.26	164.48	42	0	N/A	N/A	N/A	N/A	N/A		8.98488	62.9216	62.9216
72	1278 (registration corrected) (cropped) (spliced)	Lines 6	Lines	96	-1:-1:-1.691 on	57000	Line	9.46	166.6	166.68	-1.47	103.07	150.51	37	105.24	159.66	36	0	N/A	N/A	N/A	N/A	N/A		9.45682	-6.07002	6.07002
73	1278 (registration corrected) (cropped) (spliced)	Lines 1	Lines	76	-1:-1:-1.691 on	45000	Line	8.61	32.38	327.65	-1.61	90.55	125.71	28	85.97	118.48	27	0	N/A	N/A	N/A	N/A	N/A		8.6168	-6.66432	6.66432
74	1278 (registration corrected) (cropped) (spliced)	Lines 2	Lines	76	-1:-1:-1.691 on	45000	Line	10.77	116.57	116.57	0	172.91	162.55	29	182.54	167.37	29	0	N/A	N/A	N/A	N/A	N/A		10.7689	0	0
75	1278 (registration corrected) (cropped) (spliced)	Lines 3	Lines	76	-1:-1:-1.691 on	45000	Line	8.01	90	90	-1.74	212.89	135.82	31	220.83	135.82	30	0	N/A	N/A	N/A	N/A	N/A		8.00272	-7.1783	7.1783
76	1278 (registration corrected) (cropped) (spliced)	Lines 4	Lines	76	-1:-1:-1.691 on	45000	Line	8.65	12.87	12.87	0	164.48	197.23	28	166.41	188.8	28	0	N/A	N/A	N/A	N/A	N/A		8.64811	0	0
77	1278 (registration corrected) (cropped) (spliced)	Lines 5	Lines	76	-1:-1:-1.691 on	45000	Line	8.52	54.53	54.46	-3.33	189.53	147.86	35	196.27	143.05	33	0	N/A	N/A	N/A	N/A	N/A		8.51843	-13.5789	13.5789
78	1278 (registration corrected) (cropped) (spliced)	Lines 1	Lines	127	-1:-1:-1.691 on	75600	Line	9.75	21.49	16.5	-13.96	225.65	146.18	32	227.58	139.68	25	0	N/A	N/A	N/A	N/A	N/A		9.74551	-45.9126	45.9126
79	1278 (registration corrected) (cropped) (spliced)	Lines 2	Lines	127	-1:-1:-1.691 on	75600	Line	10.63	90	90	-33.69	193.14	159.18	36	196.75	159.18	26	0	N/A	N/A	N/A	N/A	N/A		10.6317	-70.1504	70.1504
80	1278 (registration corrected) (cropped) (spliced)	Lines 3	Lines	127	-1:-1:-1.691 on	75600	Line	8.15	34.16	34.16	0	193.14	150.03	23	197.71	143.29	23	0	N/A	N/A	N/A	N/A	N/A		8.14325	0	0
81	1278 (registration corrected) (cropped) (spliced)	Lines 1	Lines	101	-1:-1:-1.691 on	60000	Line	9.17	13.67	13.67	0	213.37	147.86	24	215.53	138.95	24	0	N/A	N/A	N/A	N/A	N/A		9.16808	0	0
82	1278 (registration corrected) (cropped) (spliced)	Lines 2	Lines	101	-1:-1:-1.691 on	60000	Line	9.87	90	270	-18.43	194.58	131.25	34	188.8	131.25	26	0	N/A	N/A	N/A	N/A	N/A		9.86957	-54.1519	54.1519
83	1278 (registration corrected) (cropped) (spliced)	Lines 3	Lines	101	-1:-1:-1.691 on	60000	Line	10.16	90	90	-1.36	51.05	209.27	30	61.17	209.27	29	0	N/A	N/A	N/A	N/A	N/A		10.1693	-5.64332	5.64332
84	1278 (registration corrected) (cropped) (spliced)	Lines 4	Lines	101	-1:-1:-1.691 on	60000	Line	7.22	57.4	57.38	1.93	1.44	205.42	30	7.47	201.57	31	0	N/A	N/A	N/A	N/A	N/A		7.22381	7.95707	7.95707
85	1278 (registration corrected) (cropped) (spliced)	Lines 5	Lines	101	-1:-1:-1.691 on	60000	Line	8.05	90	270	-5.53	12.28	195.55	38	4.82	195.55	35	0	N/A	N/A	N/A	N/A	N/A		8.04062	-21.9073	21.9073
86	1278 (registration corrected) (cropped) (spliced)	Lines 6	Lines	101	-1:-1:-1.691 on	60000	Line	8.29	90	270	-41.63	33.71	215.53	42	31.55	215.53	34	0	N/A	N/A	N/A	N/A	N/A		8.28647	-74.8904	74.8904
87	1278 (registration corrected) (cropped) (spliced)	Lines 1	Lines	124	-1:-1:-1.691 on	73800	Line	7.74	48.84	48.81	-1.8	28.9	199.4	38	34.68	194.34	37	0	N/A	N/A	N/A	N/A	N/A		7.74674	-7.41681	7.41681
88	1278 (registration corrected) (cropped) (spliced)	Lines 2	Lines	124	-1:-1:-1.691 on	73800	Line	10.33	132.88	133.03	4.18	23.6	220.59	38	30.83	227.33	41	0	N/A	N/A	N/A	N/A	N/A		10.3296	16.8836	16.8836
89	1278 (registration corrected) (cropped) (spliced)	Lines 3	Lines	124	-1:-1:-1.691 on	73800	Line	8.72	57.89	57.38	-9.56	14.21	204.94	38	20.23	201.09	33	0	N/A	N/A	N/A	N/A	N/A		8.7214	-34.9808	34.9808
90	1278 (registration corrected) (cropped) (spliced)	Lines 1	Lines	108	-1:-1:-1.691 on	64200	Line	10.23	90	90	12.72	18.06	212.89	35	25.53	212.89	42	0	N/A	N/A	N/A	N/A	N/A		10.2372	43.1396	43.1396
91	1278 (registration corrected) (cropped) (spliced)	Lines 2	Lines	108	-1:-1:-1.691 on	64200	Line	8.07	15.8	344.29	-1.72	121.86	238.65	37	119.69	230.95	36	0	N/A	N/A	N/A	N/A	N/A		8.06219	-7.12508	7.12508
92	1278 (registration corrected) (cropped) (spliced)	Lines 3	Lines	108	-1:-1:-1.691 on	64200	Line	10.23	90	90	12.72	138.95	202.05	31	146.42	202.05	38	0	N/A	N/A	N/A	N/A	N/A		10.2372	43.1396	43.1396
93	1278 (registration corrected) (cropped) (spliced)	Lines 4	Lines	108	-1:-1:-1.691 on	64200	Line	7.77	90	90	1.79	159.18	225.89	36	166.89	225.89	37	0	N/A	N/A	N/A	N/A	N/A		7.77458	7.3901	7.3901
94	1278 (registration corrected) (cropped) (spliced)	Lines 5	Lines	108	-1:-1:-1.691 on	64200	Line	9.73	122.85	123.23	8.21	133.66	212.16	35	140.64	216.74	40	0	N/A	N/A	N/A	N/A	N/A		9.73123	30.9179	30.9179
95	1278 (registration corrected) (cropped) (spliced)	Lines 6	Lines	108	-1:-1:-1.691 on	64200	Line	10.84	44.66	316.08	-9.09	94.16	226.37	38	87.9	219.87	32	0	N/A	N/A	N/A	N/A	N/A		10.8369	-33.6189	33.6189
96	1278 (registration corrected) (cropped) (spliced)	Lines 1	Lines	100	-1:-1:-1.691 on	59400	Line	9.62	31.7	31.7	0	144.49	222.04	34	149.55	213.85	34	0	N/A	N/A	N/A	N/A	N/A		9.62703	0	0
97	1278 (registration corrected) (cropped) (spliced)	Lines 2	Lines	100	-1:-1:-1.691 on	59400	Line	9.73	160.68	177.51	-19.16	105.96	210.72	39	106.2	216.26	31	0	N/A	N/A	N/A	N/A	N/A		9.73392	-55.2723	55.2723
98	1278 (registration corrected) (cropped) (spliced)	Lines 3	Lines	100	-1:-1:-1.691 on	59400	Line	10.07	90	90	2.79	82.12	206.87	35	91.99	206.87	37	0	N/A	N/A	N/A	N/A	N/A		10.0706	11.455	11.455
99	1278 (registration corrected) (cropped) (spliced)	Lines 4	Lines	100	-1:-1:-1.691 on	59400	Line	10.29	66.45	293.55	1.35	202.77	220.35	31	193.38	216.26	32	0	N/A	N/A	N/A	N/A	N/A		10.2908	5.57648	5.57648
100	1278 (registration corrected) (cropped) (spliced)	Lines 5	Lines	100	-1:-1:-1.691 on	59400	Line	10.31	37.41	322.59	0	233.84	206.38	35	227.58	198.2	35	0	N/A	N/A	N/A	N/A	N/A		10.3005	0	0
101	1278 (registration corrected) (cropped) (spliced)	Lines 6	Lines	100	-1:-1:-1.691 on	59400	Line	11	90	270	-84.81	211.44	192.9	37	211.2	192.9	26	0	N/A	N/A	N/A	N/A	N/A		11.0026	-88.7501	88.7501
ID	Item Name	Name	Population	Timepoint	Abs. Time	Rel. Time (s)	Type	Total Line Length (um)	Angle (degrees)	Bearing (degrees)	Elevation (degrees)	Start Position X	Start Position Y	Start Position Z	End Position X	End Position Y	End Position Z	Line Width (um)	Parent ID	Intensity	Distance (um)	Distance	Normalized Distance	line_length_um	division_angle_degrees
1	1280 (Aligned) (cropped)	Lines 1	Lines	72	-1:-1:-1.821 on	42600	Line	7.46	90	90	-12.26	15.66	60.49	35	21.21	60.49	30	0	N/A	N/A	N/A	N/A	N/A	7.47011	42.0157
2	1280 (Aligned) (cropped)	Lines 2	Lines	72	-1:-1:-1.821 on	42600	Line	6.26	90	90	-11.31	38.56	62.18	33	43.38	62.18	29	0	N/A	N/A	N/A	N/A	N/A	6.26358	39.6884
3	1280 (Aligned) (cropped)	Lines 3	Lines	72	-1:-1:-1.821 on	42600	Line	10.43	90	90	-7.5	10.6	16.39	33	19.76	16.39	28	0	N/A	N/A	N/A	N/A	N/A	10.4358	28.628
4	1280 (Aligned) (cropped)	Lines 1	Lines	75	-1:-1:-1.821 on	44400	Line	8.56	57.65	57.65	0	7.71	29.4	31	14.94	24.82	31	0	N/A	N/A	N/A	N/A	N/A	8.55858	0
5	1280 (Aligned) (cropped)	Lines 2	Lines	75	-1:-1:-1.821 on	44400	Line	8.73	90	90	-1.59	20.24	41.45	28	28.92	41.45	27	0	N/A	N/A	N/A	N/A	N/A	8.73741	6.57192
6	1280 (Aligned) (cropped)	Lines 3	Lines	75	-1:-1:-1.821 on	44400	Line	9.59	110.72	110.73	1.45	28.92	37.35	20	37.84	40.73	21	0	N/A	N/A	N/A	N/A	N/A	9.59118	5.98467
7	1280 (Aligned) (cropped)	Lines 1	Lines	82	-1:-1:-1.821 on	48600	Line	9.6	90	270	-19.98	33.5	20	34	28.2	20	26	0	N/A	N/A	N/A	N/A	N/A	9.59635	56.4755
8	1280 (Aligned) (cropped)	Lines 2	Lines	82	-1:-1:-1.821 on	48600	Line	8.92	90	90	0	17.59	49.89	21	26.51	49.89	21	0	N/A	N/A	N/A	N/A	N/A	8.92	0
9	1280 (Aligned) (cropped)	Lines 1	Lines	87	-1:-1:-1.821 on	51600	Line	7.23	160.26	160.35	-1.93	44.1	10.84	34	46.51	17.59	33	0	N/A	N/A	N/A	N/A	N/A	7.23675	7.94275
10	1280 (Aligned) (cropped)	Lines 2	Lines	87	-1:-1:-1.821 on	51600	Line	9.6	29.2	331.93	-8.37	57.84	65.55	31	53.98	58.32	26	0	N/A	N/A	N/A	N/A	N/A	9.60065	31.3858
11	1280 (Aligned) (cropped)	Lines 3	Lines	87	-1:-1:-1.821 on	51600	Line	9.94	140.91	140.91	0	12.05	33.02	21	18.32	40.73	21	0	N/A	N/A	N/A	N/A	N/A	9.93766	0
12	1280 (Aligned) (cropped)	Lines 4	Lines	87	-1:-1:-1.821 on	51600	Line	5.51	122.24	122.28	-2.55	38.08	40.73	29	42.66	43.62	28	0	N/A	N/A	N/A	N/A	N/A	5.50713	10.462
13	1280 (Aligned) (cropped)	Lines 5	Lines	87	-1:-1:-1.821 on	51600	Line	7.73	90	90	3.69	65.31	13.74	30	72.78	13.74	32	0	N/A	N/A	N/A	N/A	N/A	7.7331	14.9887
14	1280 (Aligned) (cropped)	Lines 1	Lines	107	-1:-1:-1.821 on	63600	Line	5.88	145.01	145.01	0	51.57	5.54	23	54.95	10.36	23	0	N/A	N/A	N/A	N/A	N/A	5.887	0
15	1280 (Aligned) (cropped)	Lines 2	Lines	107	-1:-1:-1.821 on	63600	Line	8.84	115.87	115.87	0	34.7	22.9	21	42.66	26.75	21	0	N/A	N/A	N/A	N/A	N/A	8.84218	0
16	1280 (Aligned) (cropped)	Lines 1	Lines	120	-1:-1:-1.821 on	71400	Line	8.36	123.23	123.23	0	44.1	14.22	21	51.09	18.8	21	0	N/A	N/A	N/A	N/A	N/A	8.35682	0
17	1280 (Aligned) (cropped)	Lines 2	Lines	120	-1:-1:-1.821 on	71400	Line	6.07	104.57	104.62	-4.81	49.16	38.32	31	54.71	39.77	29	0	N/A	N/A	N/A	N/A	N/A	6.07495	19.2215
18	1280 (Aligned) (cropped)	Lines 3	Lines	120	-1:-1:-1.821 on	71400	Line	7.88	113.43	113.43	0	27.47	41.21	29	34.7	44.34	29	0	N/A	N/A	N/A	N/A	N/A	7.87844	0
19	1280 (Aligned) (cropped)	Lines 4	Lines	120	-1:-1:-1.821 on	71400	Line	6.17	90	90	-18.43	15.91	63.62	34	19.52	63.62	29	0	N/A	N/A	N/A	N/A	N/A	6.16702	54.1707
20	1280 (Aligned) (cropped)	Lines 5	Lines	120	-1:-1:-1.821 on	71400	Line	7.09	144.69	144.69	0	1.93	57.6	21	6.02	63.38	21	0	N/A	N/A	N/A	N/A	N/A	7.08071	0
21	1280 (Aligned) (cropped)	Lines 1	Lines	131	-1:-1:-1.821 on	78000	Line	7.87	100.93	100.95	-3.62	12.77	46.75	29	20.24	48.2	27	0	N/A	N/A	N/A	N/A	N/A	7.73186	7.43117
21	1280 (Aligned) (cropped)	Lines 3	Lines	145	-1:-1:-1.821 on	86400	Line	7.74	136.24	136.27	-1.8	47.24	0	34	52.54	5.54	33	0	N/A	N/A	N/A	N/A	N/A	0	[]
22	1280 (Aligned) (cropped)	Lines 2	Lines	131	-1:-1:-1.821 on	78000	Line	6.94	69.68	69.68	0	65.55	10.36	23	72.06	7.95	23	0	N/A	N/A	N/A	N/A	N/A	6.94177	0
23	1280 (Aligned) (cropped)	Lines 3	Lines	131	-1:-1:-1.821 on	78000	Line	9.31	18.99	11.31	15.35	10.6	65.79	28	11.81	59.77	35	0	N/A	N/A	N/A	N/A	N/A	9.31153	48.7428
24	1280 (Aligned) (cropped)	Lines 4	Lines	131	-1:-1:-1.821 on	78000	Line	9.21	90	90	1.51	8.44	7.95	19	17.59	7.95	20	0	N/A	N/A	N/A	N/A	N/A	9.20448	6.23708
25	1280 (Aligned) (cropped)	Lines 5	Lines	131	-1:-1:-1.821 on	78000	Line	8.52	45	45	0	35.67	16.87	20	41.69	10.84	20	0	N/A	N/A	N/A	N/A	N/A	8.52064	0
26	1280 (Aligned) (cropped)	Lines 1	Lines	136	-1:-1:-1.821 on	81000	Line	6.97	114.76	114.78	-2	23.38	1.93	23	29.64	4.82	22	0	N/A	N/A	N/A	N/A	N/A	6.96704	8.25233
27	1280 (Aligned) (cropped)	Lines 2	Lines	136	-1:-1:-1.821 on	81000	Line	10.16	62.39	298.07	-10.01	38.56	5.78	34	31.33	1.93	28	0	N/A	N/A	N/A	N/A	N/A	10.1536	36.2226
28	1280 (Aligned) (cropped)	Lines 3	Lines	136	-1:-1:-1.821 on	81000	Line	6.88	90	90	-23.2	71.34	32.29	38	74.71	32.29	32	0	N/A	N/A	N/A	N/A	N/A	6.88163	60.6785
29	1280 (Aligned) (cropped)	Lines 1	Lines	145	-1:-1:-1.821 on	86400	Line	6.92	109.69	109.98	9.7	72.78	16.39	32	78.08	18.32	36	0	N/A	N/A	N/A	N/A	N/A	6.91483	35.3428
30	1280 (Aligned) (cropped)	Lines 2	Lines	145	-1:-1:-1.821 on	86400	Line	9.16	90	90	0	56.15	22.17	36	65.31	22.17	36	0	N/A	N/A	N/A	N/A	N/A	9.16	0
32	1280 (Aligned) (cropped)	Lines 4	Lines	145	-1:-1:-1.821 on	86400	Line	7.23	19.74	19.65	-1.93	40.97	29.16	33	43.38	22.41	32	0	N/A	N/A	N/A	N/A	N/A	7.23675	7.94275
33	1280 (Aligned) (cropped)	Lines 1	Lines	39	-1:-1:-1.821 on	22800	Line	8.64	59.75	59.62	5.1	71.58	26.51	33	78.57	22.41	36	0	N/A	N/A	N/A	N/A	N/A	8.64119	20.3146
34	1280 (Aligned) (cropped)	Lines 2	Lines	39	-1:-1:-1.821 on	22800	Line	6.57	58.7	58.67	2.13	61.45	30.85	24	67	27.47	25	0	N/A	N/A	N/A	N/A	N/A	6.57472	8.74852
35	1280 (Aligned) (cropped)	Lines 3	Lines	39	-1:-1:-1.821 on	22800	Line	6.16	149.42	149.42	0	137.85	57.6	36	140.98	62.9	36	0	N/A	N/A	N/A	N/A	N/A	6.15523	0
36	1280 (Aligned) (cropped)	Lines 4	Lines	39	-1:-1:-1.821 on	22800	Line	7.29	51.69	309.47	-12.79	127.25	29.4	37	123.15	26.03	32	0	N/A	N/A	N/A	N/A	N/A	7.29156	43.2926
37	1280 (Aligned) (cropped)	Lines 1	Lines	65	-1:-1:-1.821 on	38400	Line	9.01	90	270	-77.47	135.2	14.22	39	134.72	14.22	30	0	N/A	N/A	N/A	N/A	N/A	9.01279	86.9471
38	1280 (Aligned) (cropped)	Lines 2	Lines	65	-1:-1:-1.821 on	38400	Line	9.22	90	90	-22.83	78.57	31.57	34	83.14	31.57	26	0	N/A	N/A	N/A	N/A	N/A	9.2133	60.2628
39	1280 (Aligned) (cropped)	Lines 3	Lines	65	-1:-1:-1.821 on	38400	Line	7.85	90	270	-15.95	148.22	46.75	39	143.15	46.75	33	0	N/A	N/A	N/A	N/A	N/A	7.85525	49.8022
40	1280 (Aligned) (cropped)	Lines 1	Lines	76	-1:-1:-1.821 on	45000	Line	6.71	109.74	109.8	4.3	143.15	20	33	149.18	22.17	35	0	N/A	N/A	N/A	N/A	N/A	6.7134	17.3322
41	1280 (Aligned) (cropped)	Lines 2	Lines	76	-1:-1:-1.821 on	45000	Line	9.79	90	90	-29.36	124.11	28.2	37	127.97	28.2	28	0	N/A	N/A	N/A	N/A	N/A	9.79283	66.786
42	1280 (Aligned) (cropped)	Lines 3	Lines	76	-1:-1:-1.821 on	45000	Line	6.62	36.7	326.31	-15.5	95.92	46.75	36	93.51	43.14	31	0	N/A	N/A	N/A	N/A	N/A	6.62119	49.0386
43	1280 (Aligned) (cropped)	Lines 1	Lines	86	-1:-1:-1.821 on	51000	Line	8.05	153.26	165.96	-23	150.63	30.13	40	151.59	33.98	33	0	N/A	N/A	N/A	N/A	N/A	8.04637	60.4537
44	1280 (Aligned) (cropped)	Lines 2	Lines	86	-1:-1:-1.821 on	51000	Line	6.69	123.09	123.11	-2.09	113.27	40.73	34	118.81	44.34	33	0	N/A	N/A	N/A	N/A	N/A	6.68758	8.59975
45	1280 (Aligned) (cropped)	Lines 3	Lines	86	-1:-1:-1.821 on	51000	Line	5.54	90	90	0	82.66	14.94	25	88.21	14.94	25	0	N/A	N/A	N/A	N/A	N/A	5.55	0
46	1280 (Aligned) (cropped)	Lines 1	Lines	102	-1:-1:-1.821 on	60600	Line	10.3	138.8	138.81	-1.35	114.96	39.77	24	121.71	47.48	23	0	N/A	N/A	N/A	N/A	N/A	10.296	5.57367
47	1280 (Aligned) (cropped)	Lines 2	Lines	102	-1:-1:-1.821 on	60600	Line	7.57	90	270	-30.26	96.64	59.53	35	93.75	59.53	28	0	N/A	N/A	N/A	N/A	N/A	7.57312	67.5664
48	1280 (Aligned) (cropped)	Lines 3	Lines	102	-1:-1:-1.821 on	60600	Line	7	90	90	-21.8	121.95	49.89	38	125.56	49.89	32	0	N/A	N/A	N/A	N/A	N/A	7.00229	58.9661
49	1280 (Aligned) (cropped)	Lines 4	Lines	102	-1:-1:-1.821 on	60600	Line	9.7	90	270	-30.96	158.34	59.04	40	154.72	59.04	31	0	N/A	N/A	N/A	N/A	N/A	9.70074	68.0889
50	1280 (Aligned) (cropped)	Lines 5	Lines	102	-1:-1:-1.821 on	60600	Line	8.46	131.86	226.64	-13.62	140.02	22.17	37	135.68	26.27	31	0	N/A	N/A	N/A	N/A	N/A	8.46437	45.1417
51	1280 (Aligned) (cropped)	Lines 6	Lines	102	-1:-1:-1.821 on	60600	Line	7.95	90	90	0	79.77	6.27	33	87.72	6.27	33	0	N/A	N/A	N/A	N/A	N/A	7.95	0
52	1280 (Aligned) (cropped)	Lines 1	Lines	115	-1:-1:-1.821 on	68400	Line	7.49	19.36	18.43	-6.02	95.19	35.91	36	97.36	29.4	33	0	N/A	N/A	N/A	N/A	N/A	7.48926	23.614
53	1280 (Aligned) (cropped)	Lines 2	Lines	115	-1:-1:-1.821 on	68400	Line	7.23	90	90	0	134.48	50.61	22	141.71	50.61	22	0	N/A	N/A	N/A	N/A	N/A	7.23	0
54	1280 (Aligned) (cropped)	Lines 3	Lines	115	-1:-1:-1.821 on	68400	Line	7.54	26.57	26.57	0	105.56	36.15	33	108.93	29.4	33	0	N/A	N/A	N/A	N/A	N/A	7.54449	0
55	1280 (Aligned) (cropped)	Lines 4	Lines	115	-1:-1:-1.821 on	68400	Line	8.97	120.7	120.7	0	121.71	10.36	33	129.42	14.94	33	0	N/A	N/A	N/A	N/A	N/A	8.96775	0
56	1280 (Aligned) (cropped)	Lines 1	Lines	118	-1:-1:-1.821 on	70200	Line	9.24	145.77	145.89	3.06	114.23	0.964	28	119.3	8.44	30	0	N/A	N/A	N/A	N/A	N/A	9.25178	12.4844
57	1280 (Aligned) (cropped)	Lines 2	Lines	118	-1:-1:-1.821 on	70200	Line	8.44	90	90	0	129.42	59.77	25	137.85	59.77	25	0	N/A	N/A	N/A	N/A	N/A	8.43	0
58	1280 (Aligned) (cropped)	Lines 3	Lines	118	-1:-1:-1.821 on	70200	Line	8.49	90	90	1.64	104.35	57.36	35	112.79	57.36	36	0	N/A	N/A	N/A	N/A	N/A	8.49904	6.7571
59	1280 (Aligned) (cropped)	Lines 4	Lines	118	-1:-1:-1.821 on	70200	Line	6.82	90	90	-2.05	109.41	20.24	20	116.16	20.24	19	0	N/A	N/A	N/A	N/A	N/A	6.82367	8.42697
60	1280 (Aligned) (cropped)	Lines 1	Lines	129	-1:-1:-1.821 on	76800	Line	7.01	40.82	40.82	0	120.98	26.27	25	125.56	20.97	25	0	N/A	N/A	N/A	N/A	N/A	7.00474	0
61	1280 (Aligned) (cropped)	Lines 2	Lines	129	-1:-1:-1.821 on	76800	Line	8.14	17.44	342.65	1.71	93.03	13.98	22	90.62	6.27	23	0	N/A	N/A	N/A	N/A	N/A	8.13955	7.05702
62	1280 (Aligned) (cropped)	Lines 3	Lines	129	-1:-1:-1.821 on	76800	Line	6.21	147.64	149.53	11.46	87.48	22.9	21	89.89	26.99	25	0	N/A	N/A	N/A	N/A	N/A	6.20775	40.1174
63	1280 (Aligned) (cropped)	Lines 4	Lines	129	-1:-1:-1.821 on	76800	Line	6.35	90	90	2.2	122.43	1.93	19	128.69	1.93	20	0	N/A	N/A	N/A	N/A	N/A	6.33937	9.076
64	1280 (Aligned) (cropped)	Lines 5	Lines	129	-1:-1:-1.821 on	76800	Line	8.49	90	90	1.64	135.44	26.27	19	143.88	26.27	20	0	N/A	N/A	N/A	N/A	N/A	8.49904	6.7571
65	1280 (Aligned) (cropped)	Lines 1	Lines	132	-1:-1:-1.821 on	78600	Line	6.86	96.11	96.12	-2.03	127.01	39.77	22	133.76	40.49	21	0	N/A	N/A	N/A	N/A	N/A	6.86155	8.38011
66	1280 (Aligned) (cropped)	Lines 2	Lines	132	-1:-1:-1.821 on	78600	Line	8.02	90	90	-1.74	155.93	17.11	33	163.88	17.11	32	0	N/A	N/A	N/A	N/A	N/A	8.01265	7.16936
67	1280 (Aligned) (cropped)	Lines 3	Lines	132	-1:-1:-1.821 on	78600	Line	9.28	139.21	139.24	-1.5	102.67	9.4	24	108.69	16.39	23	0	N/A	N/A	N/A	N/A	N/A	9.27904	6.18677
68	1280 (Aligned) (cropped)	Lines 1	Lines	137	-1:-1:-1.821 on	81600	Line	11.17	17.69	17.65	1.24	139.06	42.17	25	142.43	31.57	26	0	N/A	N/A	N/A	N/A	N/A	11.1677	5.13738
69	1280 (Aligned) (cropped)	Lines 2	Lines	137	-1:-1:-1.821 on	81600	Line	9.29	50.46	50.39	-3.04	152.31	28.68	25	159.3	22.9	23	0	N/A	N/A	N/A	N/A	N/A	9.28808	12.4349
70	1280 (Aligned) (cropped)	Lines 3	Lines	137	-1:-1:-1.821 on	81600	Line	8.9	90	90	3.18	106.28	50.61	35	114.96	50.61	37	0	N/A	N/A	N/A	N/A	N/A	8.90744	12.9753
71	1280 (Aligned) (cropped)	Lines 4	Lines	137	-1:-1:-1.821 on	81600	Line	9.39	113.16	113.2	3.01	129.18	2.65	29	137.61	6.27	31	0	N/A	N/A	N/A	N/A	N/A	9.38985	12.298
72	1280 (Aligned) (cropped)	Lines 5	Lines	137	-1:-1:-1.821 on	81600	Line	9.77	90	270	-10.62	89.17	61.94	34	81.46	61.94	28	0	N/A	N/A	N/A	N/A	N/A	9.76955	37.8904
73	1280 (Aligned) (cropped)	Lines 1	Lines	27	-1:-1:-1.821 on	15600	Line	9.77	90	90	-6.17	149.9	63.38	38	158.82	63.38	34	0	N/A	N/A	N/A	N/A	N/A	9.77581	24.1529
74	1280 (Aligned) (cropped)	Lines 2	Lines	27	-1:-1:-1.821 on	15600	Line	6.39	133.41	133.45	-2.19	173.52	52.3	24	178.1	56.63	23	0	N/A	N/A	N/A	N/A	N/A	6.38164	9.01538
75	1280 (Aligned) (cropped)	Lines 1	Lines	91	-1:-1:-1.821 on	54000	Line	7.15	58.89	58.67	6.36	168.22	63.62	32	173.76	60.25	35	0	N/A	N/A	N/A	N/A	N/A	7.14482	24.8273
76	1280 (Aligned) (cropped)	Lines 2	Lines	91	-1:-1:-1.821 on	54000	Line	7.84	150.21	150.26	1.78	190.39	10.36	32	194.25	17.11	33	0	N/A	N/A	N/A	N/A	N/A	7.83978	7.32831
77	1280 (Aligned) (cropped)	Lines 3	Lines	91	-1:-1:-1.821 on	54000	Line	6.7	139.41	139.9	-6.89	164.6	52.06	37	168.46	56.63	34	0	N/A	N/A	N/A	N/A	N/A	6.69212	26.6339
78	1280 (Aligned) (cropped)	Lines 4	Lines	91	-1:-1:-1.821 on	54000	Line	8.9	90	90	3.18	201.96	2.65	22	210.63	2.65	24	0	N/A	N/A	N/A	N/A	N/A	8.89769	12.9898
79	1280 (Aligned) (cropped)	Lines 5	Lines	91	-1:-1:-1.821 on	54000	Line	6.77	90	270	-24.78	230.88	42.66	37	227.75	42.66	31	0	N/A	N/A	N/A	N/A	N/A	6.76734	62.4505
80	1280 (Aligned) (cropped)	Lines 6	Lines	91	-1:-1:-1.821 on	54000	Line	9.16	90	90	0	221.48	16.39	24	230.64	16.39	24	0	N/A	N/A	N/A	N/A	N/A	9.16	0
81	1280 (Aligned) (cropped)	Lines 1	Lines	111	-1:-1:-1.821 on	66000	Line	7.47	90	90	0	229.91	36.15	24	237.38	36.15	24	0	N/A	N/A	N/A	N/A	N/A	7.47	0
82	1280 (Aligned) (cropped)	Lines 2	Lines	111	-1:-1:-1.821 on	66000	Line	9.73	90	90	-19.18	169.66	49.65	38	175.21	49.65	30	0	N/A	N/A	N/A	N/A	N/A	9.73666	55.249
83	1280 (Aligned) (cropped)	Lines 3	Lines	111	-1:-1:-1.821 on	66000	Line	9.15	58.41	58.17	-6.68	189.43	35.91	36	196.41	31.57	32	0	N/A	N/A	N/A	N/A	N/A	9.1409	25.9505
84	1280 (Aligned) (cropped)	Lines 4	Lines	111	-1:-1:-1.821 on	66000	Line	9.65	128.87	128.88	1.44	180.51	44.59	24	187.98	50.61	25	0	N/A	N/A	N/A	N/A	N/A	9.64579	5.95067
85	1280 (Aligned) (cropped)	Lines 5	Lines	111	-1:-1:-1.821 on	66000	Line	9.24	95.78	95.91	-11.63	168.22	34.46	34	175.21	35.19	28	0	N/A	N/A	N/A	N/A	N/A	9.24083	40.4883
86	1280 (Aligned) (cropped)	Lines 1	Lines	131	-1:-1:-1.821 on	78000	Line	9.14	111.79	111.8	1.52	234.25	35.19	33	242.69	38.56	34	0	N/A	N/A	N/A	N/A	N/A	9.14278	6.27934
87	1280 (Aligned) (cropped)	Lines 2	Lines	131	-1:-1:-1.821 on	78000	Line	6.56	107.1	107.1	0	177.86	56.39	35	184.12	58.32	35	0	N/A	N/A	N/A	N/A	N/A	6.55076	0
88	1280 (Aligned) (cropped)	Lines 3	Lines	131	-1:-1:-1.821 on	78000	Line	10.43	90	90	-7.5	223.17	44.34	37	232.32	44.34	32	0	N/A	N/A	N/A	N/A	N/A	10.427	28.6543
89	1280 (Aligned) (cropped)	Lines 4	Lines	131	-1:-1:-1.821 on	78000	Line	10.07	90	270	-63.43	194.01	20	35	192.8	20	25	0	N/A	N/A	N/A	N/A	N/A	10.0729	83.1008
90	1280 (Aligned) (cropped)	Lines 1	Lines	32	-1:-1:-1.821 on	18600	Line	8.91	113.16	246.25	-12.39	186.29	14.94	36	180.27	17.59	30	0	N/A	N/A	N/A	N/A	N/A	8.90297	42.3713
91	1280 (Aligned) (cropped)	Lines 2	Lines	32	-1:-1:-1.821 on	18600	Line	9.14	111.79	111.8	-1.52	210.15	37.35	35	218.59	40.73	34	0	N/A	N/A	N/A	N/A	N/A	9.14647	6.27679
92	1280 (Aligned) (cropped)	Lines 3	Lines	32	-1:-1:-1.821 on	18600	Line	9.08	22.58	22.38	-3.11	198.58	66.52	35	201.96	58.32	33	0	N/A	N/A	N/A	N/A	N/A	9.092	12.7075
93	1280 (Aligned) (cropped)	Lines 4	Lines	32	-1:-1:-1.821 on	18600	Line	7.08	139.15	139.18	-1.97	23.38	117.37	32	27.96	122.67	31	0	N/A	N/A	N/A	N/A	N/A	7.07576	8.12467
94	1280 (Aligned) (cropped)	Lines 5	Lines	32	-1:-1:-1.821 on	18600	Line	9.6	90	270	-8.37	15.91	109.9	37	7.71	109.9	32	0	N/A	N/A	N/A	N/A	N/A	9.60417	31.373
95	1280 (Aligned) (cropped)	Lines 1	Lines	82	-1:-1:-1.821 on	48600	Line	8.09	90	90	-57.99	36.63	87	42	37.84	87	34	0	N/A	N/A	N/A	N/A	N/A	8.09099	81.3992
96	1280 (Aligned) (cropped)	Lines 2	Lines	82	-1:-1:-1.821 on	48600	Line	8.29	90	90	-41.63	2.17	110.14	38	4.34	110.14	30	0	N/A	N/A	N/A	N/A	N/A	8.28908	74.8237
97	1280 (Aligned) (cropped)	Lines 3	Lines	82	-1:-1:-1.821 on	48600	Line	7.06	90	90	-1.97	55.43	103.15	31	62.42	103.15	30	0	N/A	N/A	N/A	N/A	N/A	7.06117	8.14158
98	1280 (Aligned) (cropped)	Lines 4	Lines	82	-1:-1:-1.821 on	48600	Line	6.52	90	90	-7.13	73.5	109.17	33	79.29	109.17	30	0	N/A	N/A	N/A	N/A	N/A	6.52105	27.3902
99	1280 (Aligned) (cropped)	Lines 5	Lines	82	-1:-1:-1.821 on	48600	Line	8.99	90	90	-25.2	16.39	82.66	48	20.48	82.66	40	0	N/A	N/A	N/A	N/A	N/A	8.98488	62.9216
100	1280 (Aligned) (cropped)	Lines 6	Lines	82	-1:-1:-1.821 on	48600	Line	8.25	90	90	1.68	59.29	75.67	20	67.48	75.67	21	0	N/A	N/A	N/A	N/A	N/A	8.25082	6.96136
101	1280 (Aligned) (cropped)	Lines 1	Lines	98	-1:-1:-1.821 on	58200	Line	7.83	90	270	-11.31	63.14	72.54	32	57.12	72.54	27	0	N/A	N/A	N/A	N/A	N/A	7.82562	39.7118
102	1280 (Aligned) (cropped)	Lines 2	Lines	98	-1:-1:-1.821 on	58200	Line	8	90	90	-82.87	14.94	109.41	41	15.18	109.41	33	0	N/A	N/A	N/A	N/A	N/A	8.0036	88.2816
103	1280 (Aligned) (cropped)	Lines 3	Lines	98	-1:-1:-1.821 on	58200	Line	7.06	90	90	-1.97	15.18	121.46	24	22.17	121.46	23	0	N/A	N/A	N/A	N/A	N/A	7.06117	8.14158
104	1280 (Aligned) (cropped)	Lines 4	Lines	98	-1:-1:-1.821 on	58200	Line	7.15	122.62	122.62	0	73.99	91.82	24	80.01	95.68	24	0	N/A	N/A	N/A	N/A	N/A	7.15122	0
105	1280 (Aligned) (cropped)	Lines 1	Lines	107	-1:-1:-1.821 on	63600	Line	8.18	70.5	70.46	-3.48	26.03	101.94	23	33.5	99.29	21	0	N/A	N/A	N/A	N/A	N/A	8.17456	14.1618
106	1280 (Aligned) (cropped)	Lines 2	Lines	107	-1:-1:-1.821 on	63600	Line	8.18	90	90	-48.81	12.05	81.94	45	13.74	81.94	37	0	N/A	N/A	N/A	N/A	N/A	8.17656	78.0716
107	1280 (Aligned) (cropped)	Lines 3	Lines	107	-1:-1:-1.821 on	63600	Line	8.71	165.58	165.58	0	46.51	83.39	25	48.68	91.82	25	0	N/A	N/A	N/A	N/A	N/A	8.70481	0
108	1280 (Aligned) (cropped)	Lines 1	Lines	125	-1:-1:-1.821 on	74400	Line	6.02	90	90	71.57	38.56	105.56	33	39.04	105.56	39	0	N/A	N/A	N/A	N/A	N/A	6.01917	85.4261
109	1280 (Aligned) (cropped)	Lines 2	Lines	125	-1:-1:-1.821 on	74400	Line	8.19	90	90	0	19.28	94.95	23	27.47	94.95	23	0	N/A	N/A	N/A	N/A	N/A	8.19	0
110	1280 (Aligned) (cropped)	Lines 3	Lines	125	-1:-1:-1.821 on	74400	Line	8.1	22.75	337.25	0	56.15	88.69	21	53.02	81.22	21	0	N/A	N/A	N/A	N/A	N/A	8.09925	0
111	1280 (Aligned) (cropped)	Lines 4	Lines	125	-1:-1:-1.821 on	74400	Line	11.07	90	90	-65.56	7.47	118.33	36	8.68	118.33	25	0	N/A	N/A	N/A	N/A	N/A	11.0663	83.7227
112	1280 (Aligned) (cropped)	Lines 5	Lines	125	-1:-1:-1.821 on	74400	Line	7.47	90	90	0	13.74	124.11	30	21.21	124.11	30	0	N/A	N/A	N/A	N/A	N/A	7.47	0
113	1280 (Aligned) (cropped)	Lines 1	Lines	132	-1:-1:-1.821 on	78600	Line	9.22	90	90	22.83	59.77	96.64	32	64.35	96.64	40	0	N/A	N/A	N/A	N/A	N/A	9.21826	60.2089
114	1280 (Aligned) (cropped)	Lines 2	Lines	132	-1:-1:-1.821 on	78600	Line	7.04	90	270	-66.8	49.89	71.09	34	49.16	71.09	27	0	N/A	N/A	N/A	N/A	N/A	7.03796	84.0464
115	1280 (Aligned) (cropped)	Lines 1	Lines	138	-1:-1:-1.821 on	82200	Line	7	90	N/A	N/A	62.42	88.21	38	62.42	88.21	31	0	N/A	N/A	N/A	N/A	N/A	7	90
116	1280 (Aligned) (cropped)	Lines 2	Lines	138	-1:-1:-1.821 on	82200	Line	8.18	90	270	-48.81	28.92	115.2	38	27.23	115.2	30	0	N/A	N/A	N/A	N/A	N/A	8.17656	78.0716
117	1280 (Aligned) (cropped)	Lines 3	Lines	138	-1:-1:-1.821 on	82200	Line	9.85	90	90	-2.86	5.3	84.83	24	14.94	84.83	22	0	N/A	N/A	N/A	N/A	N/A	9.84528	11.7208
118	1280 (Aligned) (cropped)	Lines 4	Lines	138	-1:-1:-1.821 on	82200	Line	8.03	90	90	-69.44	41.93	97.85	35	42.66	97.85	27	0	N/A	N/A	N/A	N/A	N/A	8.03324	84.7862
119	1280 (Aligned) (cropped)	Lines 5	Lines	138	-1:-1:-1.821 on	82200	Line	6.9	42.18	42.14	2.02	68.69	104.11	18	73.26	99.05	19	0	N/A	N/A	N/A	N/A	N/A	6.89119	8.34381
120	1280 (Aligned) (cropped)	Lines 6	Lines	138	-1:-1:-1.821 on	82200	Line	10.32	90	90	2.73	43.86	72.54	21	53.98	72.54	23	0	N/A	N/A	N/A	N/A	N/A	10.3157	11.1792
121	1280 (Aligned) (cropped)	Lines 1	Lines	148	-1:-1:-1.821 on	88200	Line	8.13	90	270	-53.13	51.33	127.97	35	49.89	127.97	27	0	N/A	N/A	N/A	N/A	N/A	8.12857	79.796
122	1280 (Aligned) (cropped)	Lines 2	Lines	148	-1:-1:-1.821 on	88200	Line	8.41	152.7	152.7	0	64.59	90.86	32	68.44	98.33	32	0	N/A	N/A	N/A	N/A	N/A	8.40377	0
123	1280 (Aligned) (cropped)	Lines 3	Lines	148	-1:-1:-1.821 on	88200	Line	6.35	90	90	4.57	54.95	108.21	31	60.97	108.21	33	0	N/A	N/A	N/A	N/A	N/A	6.34353	18.3778
124	1280 (Aligned) (cropped)	Lines 1	Lines	36	-1:-1:-1.821 on	21000	Line	9.7	90	90	-30.96	66.52	104.59	37	70.13	104.59	28	0	N/A	N/A	N/A	N/A	N/A	9.69702	68.1437
125	1280 (Aligned) (cropped)	Lines 2	Lines	36	-1:-1:-1.821 on	21000	Line	10.32	127.41	127.41	0	13.74	74.47	24	21.93	80.73	24	0	N/A	N/A	N/A	N/A	N/A	10.3084	0
126	1280 (Aligned) (cropped)	Lines 3	Lines	36	-1:-1:-1.821 on	21000	Line	6.81	90	90	-4.24	132.07	94.23	23	138.57	94.23	21	0	N/A	N/A	N/A	N/A	N/A	6.80074	17.1027
127	1280 (Aligned) (cropped)	Lines 4	Lines	36	-1:-1:-1.821 on	21000	Line	8.36	90	90	20.22	99.05	94.23	27	103.63	94.23	34	0	N/A	N/A	N/A	N/A	N/A	8.36519	56.8038
128	1280 (Aligned) (cropped)	Lines 5	Lines	36	-1:-1:-1.821 on	21000	Line	8.78	90	90	28.07	137.85	70.85	29	141.47	70.85	37	0	N/A	N/A	N/A	N/A	N/A	8.78091	65.6532
129	1280 (Aligned) (cropped)	Lines 6	Lines	36	-1:-1:-1.821 on	21000	Line	8.07	105.7	105.71	1.72	117.37	109.41	23	125.08	111.58	24	0	N/A	N/A	N/A	N/A	N/A	8.07174	7.1166
130	1280 (Aligned) (cropped)	Lines 1	Lines	84	-1:-1:-1.821 on	49800	Line	8.24	90	90	21.25	123.39	101.46	28	127.73	101.46	35	0	N/A	N/A	N/A	N/A	N/A	8.23624	58.2011
131	1280 (Aligned) (cropped)	Lines 2	Lines	84	-1:-1:-1.821 on	49800	Line	7.51	132.4	132.4	0	85.8	82.66	23	91.34	87.72	23	0	N/A	N/A	N/A	N/A	N/A	7.50301	0
132	1280 (Aligned) (cropped)	Lines 1	Lines	87	-1:-1:-1.821 on	51600	Line	7.26	90	90	-41.19	131.83	98.33	40	133.76	98.33	33	0	N/A	N/A	N/A	N/A	N/A	7.26119	74.5857
133	1280 (Aligned) (cropped)	Lines 2	Lines	87	-1:-1:-1.821 on	51600	Line	9.12	90	90	-56.31	118.81	120.74	37	120.26	120.74	28	0	N/A	N/A	N/A	N/A	N/A	9.11606	80.8477
134	1280 (Aligned) (cropped)	Lines 1	Lines	101	-1:-1:-1.821 on	60000	Line	8.43	90	90	-36.03	120.74	87.72	37	123.39	87.72	29	0	N/A	N/A	N/A	N/A	N/A	8.42748	71.6725
135	1280 (Aligned) (cropped)	Lines 1	Lines	112	-1:-1:-1.821 on	66600	Line	9.33	27.76	17.53	-21.88	123.39	78.57	37	124.84	73.99	29	0	N/A	N/A	N/A	N/A	N/A	9.33161	59.0149
136	1280 (Aligned) (cropped)	Lines 2	Lines	112	-1:-1:-1.821 on	66600	Line	8.96	155.37	155.56	-3.16	86.52	64.35	22	90.13	72.3	20	0	N/A	N/A	N/A	N/A	N/A	8.95738	12.9017
137	1280 (Aligned) (cropped)	Lines 3	Lines	112	-1:-1:-1.821 on	66600	Line	9.08	90	270	-60.95	104.35	107.24	39	103.15	107.24	30	0	N/A	N/A	N/A	N/A	N/A	9.07965	82.4054
138	1280 (Aligned) (cropped)	Lines 4	Lines	112	-1:-1:-1.821 on	66600	Line	9.77	119.73	119.74	1.42	139.3	78.57	22	147.73	83.39	23	0	N/A	N/A	N/A	N/A	N/A	9.76203	5.87956
139	1280 (Aligned) (cropped)	Lines 1	Lines	129	-1:-1:-1.821 on	76800	Line	8.93	90	90	-16.93	124.36	116.4	37	129.9	116.4	30	0	N/A	N/A	N/A	N/A	N/A	8.92702	51.6409
140	1280 (Aligned) (cropped)	Lines 2	Lines	129	-1:-1:-1.821 on	76800	Line	10.17	90	90	-1.36	118.09	78.57	23	128.21	78.57	22	0	N/A	N/A	N/A	N/A	N/A	10.1693	5.64332
141	1280 (Aligned) (cropped)	Lines 3	Lines	129	-1:-1:-1.821 on	76800	Line	11.48	90	90	3.73	106.52	88.21	18	117.61	88.21	21	0	N/A	N/A	N/A	N/A	N/A	11.4886	15.137
142	1280 (Aligned) (cropped)	Lines 4	Lines	129	-1:-1:-1.821 on	76800	Line	8.99	90	90	-25.2	143.39	79.77	42	147.49	79.77	34	0	N/A	N/A	N/A	N/A	N/A	8.98944	62.8649
143	1280 (Aligned) (cropped)	Lines 1	Lines	136	-1:-1:-1.821 on	81000	Line	8.99	128.6	128.93	6.82	100.26	86.76	30	106.52	91.82	34	0	N/A	N/A	N/A	N/A	N/A	8.98839	26.4245
144	1280 (Aligned) (cropped)	Lines 2	Lines	136	-1:-1:-1.821 on	81000	Line	8.43	90	270	-36.03	125.56	99.05	42	122.91	99.05	34	0	N/A	N/A	N/A	N/A	N/A	8.42748	71.6725
145	1280 (Aligned) (cropped)	Lines 3	Lines	136	-1:-1:-1.821 on	81000	Line	9.19	26.37	21.37	15.82	159.3	96.4	36	161.47	90.86	43	0	N/A	N/A	N/A	N/A	N/A	9.18697	49.6363
146	1280 (Aligned) (cropped)	Lines 1	Lines	140	-1:-1:-1.821 on	83400	Line	7.15	90	270	-49.4	121.71	103.87	41	120.26	103.87	34	0	N/A	N/A	N/A	N/A	N/A	7.1486	78.2971
147	1280 (Aligned) (cropped)	Lines 2	Lines	140	-1:-1:-1.821 on	83400	Line	8.95	122.81	122.83	-1.55	93.51	97.85	22	100.98	102.67	21	0	N/A	N/A	N/A	N/A	N/A	8.94613	6.41794
148	1280 (Aligned) (cropped)	Lines 3	Lines	140	-1:-1:-1.821 on	83400	Line	10.18	90	270	-51.34	148.22	85.31	41	146.29	85.31	31	0	N/A	N/A	N/A	N/A	N/A	10.1845	79.0762
149	1280 (Aligned) (cropped)	Lines 1	Lines	36	-1:-1:-1.821 on	21000	Line	6.23	115.54	115.56	-2.25	91.34	78.08	21	96.88	80.73	20	0	N/A	N/A	N/A	N/A	N/A	6.22207	9.24859
150	1280 (Aligned) (cropped)	Lines 2	Lines	36	-1:-1:-1.821 on	21000	Line	7.26	90	270	-41.19	153.76	117.61	45	151.83	117.61	38	0	N/A	N/A	N/A	N/A	N/A	7.26119	74.5857
151	1280 (Aligned) (cropped)	Lines 3	Lines	36	-1:-1:-1.821 on	21000	Line	8.01	90	90	-75.96	175.93	98.57	35	176.41	98.57	27	0	N/A	N/A	N/A	N/A	N/A	8.01439	86.5664
152	1280 (Aligned) (cropped)	Lines 4	Lines	36	-1:-1:-1.821 on	21000	Line	6.56	163.04	166.61	-10.5	182.92	68.93	34	184.12	73.99	30	0	N/A	N/A	N/A	N/A	N/A	6.56076	37.5667
153	1280 (Aligned) (cropped)	Lines 5	Lines	36	-1:-1:-1.821 on	21000	Line	6.14	41.85	41.63	-4.75	238.59	117.13	36	242.45	112.79	34	0	N/A	N/A	N/A	N/A	N/A	6.1429	19.0007
154	1280 (Aligned) (cropped)	Lines 1	Lines	117	-1:-1:-1.821 on	69600	Line	9.53	90	270	-34.7	233.77	76.4	40	230.64	76.4	31	0	N/A	N/A	N/A	N/A	N/A	9.52874	70.8235
155	1280 (Aligned) (cropped)	Lines 2	Lines	117	-1:-1:-1.821 on	69600	Line	5.5	164.74	195.26	0	219.07	76.64	23	217.62	81.94	23	0	N/A	N/A	N/A	N/A	N/A	5.49477	0
156	1280 (Aligned) (cropped)	Lines 3	Lines	117	-1:-1:-1.821 on	69600	Line	10.1	90	90	-4.29	195.21	120.02	37	204.85	120.02	34	0	N/A	N/A	N/A	N/A	N/A	10.096	17.2863
157	1280 (Aligned) (cropped)	Lines 1	Lines	131	-1:-1:-1.821 on	78000	Line	7.67	90	90	-28.3	241	117.61	42	244.13	117.61	35	0	N/A	N/A	N/A	N/A	N/A	7.66791	65.9085
158	1280 (Aligned) (cropped)	Lines 2	Lines	131	-1:-1:-1.821 on	78000	Line	8.75	123.68	123.69	1.59	201.48	71.82	25	208.71	76.64	26	0	N/A	N/A	N/A	N/A	N/A	8.74673	6.56489
159	1280 (Aligned) (cropped)	Lines 3	Lines	131	-1:-1:-1.821 on	78000	Line	8.18	90	270	-48.81	165.33	105.56	47	163.64	105.56	39	0	N/A	N/A	N/A	N/A	N/A	8.17656	78.0716
160	1280 (Aligned) (cropped)	Lines 1	Lines	144	-1:-1:-1.821 on	85800	Line	8.5	90	90	5.19	167.01	68.93	29	174.97	68.93	32	0	N/A	N/A	N/A	N/A	N/A	8.50656	20.6506
161	1280 (Aligned) (cropped)	Lines 2	Lines	144	-1:-1:-1.821 on	85800	Line	7.99	90	270	-23.63	223.89	102.18	39	220.03	102.18	32	0	N/A	N/A	N/A	N/A	N/A	7.99372	61.1264
162	1280 (Aligned) (cropped)	Lines 3	Lines	144	-1:-1:-1.821 on	85800	Line	9.18	90	90	-4.76	226.78	110.86	36	235.46	110.86	33	0	N/A	N/A	N/A	N/A	N/A	9.18381	19.0663
163	1280 (Aligned) (cropped)	Lines 4	Lines	144	-1:-1:-1.821 on	85800	Line	10.72	154.56	154.59	-1.29	175.21	107.24	26	179.79	116.88	25	0	N/A	N/A	N/A	N/A	N/A	10.7194	5.35283
164	1280 (Aligned) (cropped)	Lines 5	Lines	144	-1:-1:-1.821 on	85800	Line	8	90	N/A	N/A	167.5	100.5	44	167.5	100.5	36	0	N/A	N/A	N/A	N/A	N/A	8	90
165	1280 (Aligned) (cropped)	Lines 1	Lines	95	-1:-1:-1.821 on	56400	Line	7.85	162.12	162.12	0	224.85	117.13	25	227.26	124.6	25	0	N/A	N/A	N/A	N/A	N/A	7.84914	0
166	1280 (Aligned) (cropped)	Lines 2	Lines	95	-1:-1:-1.821 on	56400	Line	6.89	143.53	143.53	0	3.13	161.23	36	7.23	166.77	36	0	N/A	N/A	N/A	N/A	N/A	6.89214	0
167	1280 (Aligned) (cropped)	Lines 3	Lines	95	-1:-1:-1.821 on	56400	Line	9.06	166.53	173.88	12.03	69.17	174.97	30	69.89	181.71	36	0	N/A	N/A	N/A	N/A	N/A	9.0524	41.5143
168	1280 (Aligned) (cropped)	Lines 4	Lines	95	-1:-1:-1.821 on	56400	Line	6.33	117.53	117.55	2.21	6.02	149.18	27	11.57	152.07	28	0	N/A	N/A	N/A	N/A	N/A	6.33677	9.07976
169	1280 (Aligned) (cropped)	Lines 1	Lines	95	-1:-1:-1.821 on	56400	Line	8.01	68.84	68.84	0	3.37	190.15	38	10.84	187.26	38	0	N/A	N/A	N/A	N/A	N/A	8.00956	0
170	1280 (Aligned) (cropped)	Lines 1	Lines	112	-1:-1:-1.821 on	66600	Line	9.69	90	90	-1.43	5.54	186.29	28	15.18	186.29	27	0	N/A	N/A	N/A	N/A	N/A	9.69173	5.92236
171	1280 (Aligned) (cropped)	Lines 2	Lines	112	-1:-1:-1.821 on	66600	Line	10.19	18.05	18	-1.36	61.94	145.81	31	65.07	136.16	30	0	N/A	N/A	N/A	N/A	N/A	10.1941	5.62955
172	1280 (Aligned) (cropped)	Lines 3	Lines	112	-1:-1:-1.821 on	66600	Line	8.41	136.14	136.17	1.65	72.54	170.87	28	78.33	176.89	29	0	N/A	N/A	N/A	N/A	N/A	8.41216	6.82721
173	1280 (Aligned) (cropped)	Lines 4	Lines	112	-1:-1:-1.821 on	66600	Line	8.69	35.94	35.91	1.6	30.61	133.76	21	35.67	126.77	22	0	N/A	N/A	N/A	N/A	N/A	8.68698	6.61024
174	1280 (Aligned) (cropped)	Lines 5	Lines	112	-1:-1:-1.821 on	66600	Line	10.12	90	90	0	40.49	153.04	33	50.61	153.04	33	0	N/A	N/A	N/A	N/A	N/A	10.12	0
175	1280 (Aligned) (cropped)	Lines 1	Lines	128	-1:-1:-1.821 on	76200	Line	8.85	90	90	12.53	73.26	134.48	28	79.77	134.48	34	0	N/A	N/A	N/A	N/A	N/A	8.85325	42.6655
176	1280 (Aligned) (cropped)	Lines 2	Lines	128	-1:-1:-1.821 on	76200	Line	7.95	90	90	0	45.07	144.6	19	53.02	144.6	19	0	N/A	N/A	N/A	N/A	N/A	7.95	0
177	1280 (Aligned) (cropped)	Lines 3	Lines	128	-1:-1:-1.821 on	76200	Line	7.54	90	90	1.85	14.22	123.87	30	21.69	123.87	31	0	N/A	N/A	N/A	N/A	N/A	7.53664	7.62479
178	1280 (Aligned) (cropped)	Lines 4	Lines	128	-1:-1:-1.821 on	76200	Line	9.38	90	90	-39.29	37.6	135.68	36	40.25	135.68	27	0	N/A	N/A	N/A	N/A	N/A	9.38203	73.5932
179	1280 (Aligned) (cropped)	Lines 1	Lines	140	-1:-1:-1.821 on	83400	Line	9.21	90	90	-11.69	21.21	178.1	40	28.2	178.1	34	0	N/A	N/A	N/A	N/A	N/A	9.21195	40.6418
180	1280 (Aligned) (cropped)	Lines 2	Lines	140	-1:-1:-1.821 on	83400	Line	9.45	90	90	-1.47	44.59	162.43	33	53.98	162.43	32	0	N/A	N/A	N/A	N/A	N/A	9.4431	6.07887
181	1280 (Aligned) (cropped)	Lines 1	Lines	148	-1:-1:-1.821 on	88200	Line	8.13	90	270	-53.13	51.57	127.25	35	50.13	127.25	27	0	N/A	N/A	N/A	N/A	N/A	8.12857	79.796
182	1280 (Aligned) (cropped)	Lines 2	Lines	148	-1:-1:-1.821 on	88200	Line	10.34	159.4	159.44	-1.34	1.93	153.04	27	5.54	162.67	26	0	N/A	N/A	N/A	N/A	N/A	10.3329	5.55367
183	1280 (Aligned) (cropped)	Lines 3	Lines	148	-1:-1:-1.821 on	88200	Line	8.2	90	90	-3.47	15.18	141.95	23	23.14	141.95	21	0	N/A	N/A	N/A	N/A	N/A	8.20741	14.104
184	1280 (Aligned) (cropped)	Lines 4	Lines	148	-1:-1:-1.821 on	88200	Line	7.73	90	90	-3.69	28.2	156.89	27	35.67	156.89	25	0	N/A	N/A	N/A	N/A	N/A	7.7331	14.9887
185	1280 (Aligned) (cropped)	Lines 1	Lines	31	-1:-1:-1.821 on	18000	Line	7.3	90	90	1.91	130.62	194.25	33	137.85	194.25	34	0	N/A	N/A	N/A	N/A	N/A	7.29883	7.87477
186	1280 (Aligned) (cropped)	Lines 2	Lines	31	-1:-1:-1.821 on	18000	Line	6.63	161.74	162.26	-4.36	123.63	153.52	33	125.56	159.54	31	0	N/A	N/A	N/A	N/A	N/A	6.63063	17.5555
187	1280 (Aligned) (cropped)	Lines 1	Lines	56	-1:-1:-1.821 on	33000	Line	7.1	90	270	-54.46	144.12	131.59	40	142.91	131.59	33	0	N/A	N/A	N/A	N/A	N/A	7.10381	80.1929
188	1280 (Aligned) (cropped)	Lines 2	Lines	56	-1:-1:-1.821 on	33000	Line	9.45	90	270	-36.87	107.97	145.81	37	105.08	145.81	28	0	N/A	N/A	N/A	N/A	N/A	9.45262	72.1976
189	1280 (Aligned) (cropped)	Lines 1	Lines	89	-1:-1:-1.821 on	52800	Line	7.15	90	270	-49.4	143.64	136.16	38	142.19	136.16	31	0	N/A	N/A	N/A	N/A	N/A	7.1486	78.2971
190	1280 (Aligned) (cropped)	Lines 2	Lines	89	-1:-1:-1.821 on	52800	Line	8.5	90	90	-13.5	160.02	154.72	36	166.05	154.72	30	0	N/A	N/A	N/A	N/A	N/A	8.50652	44.8571
191	1280 (Aligned) (cropped)	Lines 3	Lines	89	-1:-1:-1.821 on	52800	Line	8.5	165.05	165.96	-5.2	117.61	182.92	36	119.54	190.63	33	0	N/A	N/A	N/A	N/A	N/A	8.49523	20.6794
192	1280 (Aligned) (cropped)	Lines 4	Lines	89	-1:-1:-1.821 on	52800	Line	5.78	90	90	0	103.87	175.69	21	109.66	175.69	21	0	N/A	N/A	N/A	N/A	N/A	5.79	0
193	1280 (Aligned) (cropped)	Lines 5	Lines	89	-1:-1:-1.821 on	52800	Line	8.53	75.18	75.17	1.63	154.72	165.33	23	162.92	163.16	24	0	N/A	N/A	N/A	N/A	N/A	8.54101	6.72373
194	1280 (Aligned) (cropped)	Lines 1	Lines	97	-1:-1:-1.821 on	57600	Line	8.95	152.74	152.74	0	155.44	183.88	26	159.54	191.84	26	0	N/A	N/A	N/A	N/A	N/A	8.95386	0
195	1280 (Aligned) (cropped)	Lines 2	Lines	97	-1:-1:-1.821 on	57600	Line	9.38	90	270	-39.29	140.02	142.43	41	137.37	142.43	32	0	N/A	N/A	N/A	N/A	N/A	9.38203	73.5932
196	1280 (Aligned) (cropped)	Lines 3	Lines	97	-1:-1:-1.821 on	57600	Line	6	90	N/A	N/A	155.2	136.41	39	155.2	136.41	33	0	N/A	N/A	N/A	N/A	N/A	6	90
197	1280 (Aligned) (cropped)	Lines 4	Lines	97	-1:-1:-1.821 on	57600	Line	9.03	90	270	-71.57	140.26	149.18	36	139.54	149.18	27	0	N/A	N/A	N/A	N/A	N/A	9.02875	85.4261
198	1280 (Aligned) (cropped)	Lines 1	Lines	107	-1:-1:-1.821 on	63600	Line	6.88	112.92	112.93	-2.03	148.94	129.42	24	155.2	132.07	23	0	N/A	N/A	N/A	N/A	N/A	6.87096	8.36855
199	1280 (Aligned) (cropped)	Lines 2	Lines	107	-1:-1:-1.821 on	63600	Line	8.19	90	90	0	101.46	174.97	32	109.66	174.97	32	0	N/A	N/A	N/A	N/A	N/A	8.2	0
200	1280 (Aligned) (cropped)	Lines 3	Lines	107	-1:-1:-1.821 on	63600	Line	6.67	29.76	29.48	-4.33	144.36	153.52	25	147.49	147.97	23	0	N/A	N/A	N/A	N/A	N/A	6.67828	17.4263
201	1280 (Aligned) (cropped)	Lines 1	Lines	124	-1:-1:-1.821 on	73800	Line	7.85	124.43	124.82	8.12	101.7	152.31	27	107.24	156.17	31	0	N/A	N/A	N/A	N/A	N/A	7.84801	30.6428
202	1280 (Aligned) (cropped)	Lines 2	Lines	124	-1:-1:-1.821 on	73800	Line	9.95	27.54	27.22	-4.36	89.17	159.78	32	93.51	151.35	29	0	N/A	N/A	N/A	N/A	N/A	9.94487	17.5575
203	1280 (Aligned) (cropped)	Lines 3	Lines	124	-1:-1:-1.821 on	73800	Line	10.84	116.79	118.61	19.76	157.37	140.5	24	162.67	143.39	33	0	N/A	N/A	N/A	N/A	N/A	10.8371	56.1484
204	1280 (Aligned) (cropped)	Lines 1	Lines	129	-1:-1:-1.821 on	76800	Line	10.03	127.13	127.15	1.38	120.98	144.6	22	128.94	150.63	23	0	N/A	N/A	N/A	N/A	N/A	10.0361	5.71848
205	1280 (Aligned) (cropped)	Lines 2	Lines	129	-1:-1:-1.821 on	76800	Line	7.77	90	90	-26.57	116.88	149.42	34	120.26	149.42	27	0	N/A	N/A	N/A	N/A	N/A	7.77331	64.2261
206	1280 (Aligned) (cropped)	Lines 1	Lines	135	-1:-1:-1.821 on	80400	Line	7.56	149.35	149.35	0	130.62	181.23	24	134.48	187.74	24	0	N/A	N/A	N/A	N/A	N/A	7.56834	0
207	1280 (Aligned) (cropped)	Lines 2	Lines	135	-1:-1:-1.821 on	80400	Line	8.78	90	90	-17.65	145.08	147.97	34	150.38	147.97	27	0	N/A	N/A	N/A	N/A	N/A	8.78009	52.8691
208	1280 (Aligned) (cropped)	Lines 1	Lines	143	-1:-1:-1.821 on	85200	Line	9.81	90	90	-8.13	153.04	146.05	29	161.47	146.05	24	0	N/A	N/A	N/A	N/A	N/A	9.80127	30.673
209	1280 (Aligned) (cropped)	Lines 2	Lines	143	-1:-1:-1.821 on	85200	Line	9.41	129.81	129.81	0	93.51	143.39	30	100.74	149.42	30	0	N/A	N/A	N/A	N/A	N/A	9.41455	0
210	1280 (Aligned) (cropped)	Lines 3	Lines	143	-1:-1:-1.821 on	85200	Line	9.7	75.91	75.47	-14.09	144.12	140.26	34	150.63	138.57	27	0	N/A	N/A	N/A	N/A	N/A	9.70753	46.1445
211	1280 (Aligned) (cropped)	Lines 1	Lines	85	-1:-1:-1.821 on	50400	Line	7.19	155.96	156.04	-1.94	242.45	164.84	35	245.34	171.35	34	0	N/A	N/A	N/A	N/A	N/A	7.19251	7.99192
212	1280 (Aligned) (cropped)	Lines 2	Lines	85	-1:-1:-1.821 on	50400	Line	9.18	113.77	113.81	3.08	225.58	156.17	28	233.77	159.78	30	0	N/A	N/A	N/A	N/A	N/A	9.17105	12.5961
213	1280 (Aligned) (cropped)	Lines 3	Lines	85	-1:-1:-1.821 on	50400	Line	7.23	90	90	0	212.8	157.85	25	220.03	157.85	25	0	N/A	N/A	N/A	N/A	N/A	7.23	0
214	1280 (Aligned) (cropped)	Lines 4	Lines	85	-1:-1:-1.821 on	50400	Line	8.93	90	90	-16.93	206.06	182.92	35	211.6	182.92	28	0	N/A	N/A	N/A	N/A	N/A	8.92702	51.6409
215	1280 (Aligned) (cropped)	Lines 1	Lines	96	-1:-1:-1.821 on	57000	Line	7.16	125.29	125.31	1.95	208.71	127.49	24	214.49	131.59	25	0	N/A	N/A	N/A	N/A	N/A	7.1567	8.03217
216	1280 (Aligned) (cropped)	Lines 1	Lines	107	-1:-1:-1.821 on	63600	Line	6.36	32.54	32.47	-2.2	208.71	141.71	25	212.08	136.41	24	0	N/A	N/A	N/A	N/A	N/A	6.35979	9.04661
217	1280 (Aligned) (cropped)	Lines 2	Lines	107	-1:-1:-1.821 on	63600	Line	8.02	90	90	-1.74	167.74	152.31	24	175.69	152.31	23	0	N/A	N/A	N/A	N/A	N/A	8.01265	7.16936
218	1280 (Aligned) (cropped)	Lines 3	Lines	107	-1:-1:-1.821 on	63600	Line	9.56	90	270	-14.53	191.84	124.6	37	185.33	124.6	30	0	N/A	N/A	N/A	N/A	N/A	9.55929	47.0772
219	1280 (Aligned) (cropped)	Lines 4	Lines	107	-1:-1:-1.821 on	63600	Line	8.59	90	90	-9.78	187.5	179.79	34	194.49	179.79	29	0	N/A	N/A	N/A	N/A	N/A	8.59419	35.5764
220	1280 (Aligned) (cropped)	Lines 1	Lines	114	-1:-1:-1.821 on	67800	Line	6.04	90	90	-63.43	200.75	189.91	39	201.48	189.91	33	0	N/A	N/A	N/A	N/A	N/A	6.04425	83.0631
221	1280 (Aligned) (cropped)	Lines 1	Lines	121	-1:-1:-1.821 on	72000	Line	5.3	90	90	0	213.04	190.15	36	218.35	190.15	36	0	N/A	N/A	N/A	N/A	N/A	5.31	0
222	1280 (Aligned) (cropped)	Lines 2	Lines	121	-1:-1:-1.821 on	72000	Line	8.97	90	90	1.55	230.88	180.27	27	239.79	180.27	28	0	N/A	N/A	N/A	N/A	N/A	8.96594	6.4037
223	1280 (Aligned) (cropped)	Lines 3	Lines	121	-1:-1:-1.821 on	72000	Line	8.85	150.64	150.64	0	239.07	134.96	37	243.41	142.67	37	0	N/A	N/A	N/A	N/A	N/A	8.84758	0
224	1280 (Aligned) (cropped)	Lines 1	Lines	134	-1:-1:-1.821 on	79800	Line	8.01	90	90	15.26	221.96	178.1	34	227.26	178.1	40	0	N/A	N/A	N/A	N/A	N/A	8.00562	48.5448
225	1280 (Aligned) (cropped)	Lines 2	Lines	134	-1:-1:-1.821 on	79800	Line	8.75	109.43	109.44	-1.59	192.56	189.19	27	200.75	192.08	26	0	N/A	N/A	N/A	N/A	N/A	8.74232	6.56822
226	1280 (Aligned) (cropped)	Lines 3	Lines	134	-1:-1:-1.821 on	79800	Line	7.83	90	270	11.31	168.94	146.53	31	162.92	146.53	36	0	N/A	N/A	N/A	N/A	N/A	7.82562	39.7118
227	1280 (Aligned) (cropped)	Lines 4	Lines	134	-1:-1:-1.821 on	79800	Line	7.67	90	90	-28.3	188.7	149.42	36	191.84	149.42	29	0	N/A	N/A	N/A	N/A	N/A	7.672	65.8404
228	1280 (Aligned) (cropped)	Lines 1	Lines	78	-1:-1:-1.821 on	46200	Line	7.15	90	90	-49.4	181.23	129.42	40	182.68	129.42	33	0	N/A	N/A	N/A	N/A	N/A	7.1486	78.2971
229	1280 (Aligned) (cropped)	Lines 2	Lines	78	-1:-1:-1.821 on	46200	Line	6.51	90	90	0	37.84	204.37	28	44.34	204.37	28	0	N/A	N/A	N/A	N/A	N/A	6.5	0
230	1280 (Aligned) (cropped)	Lines 3	Lines	78	-1:-1:-1.821 on	46200	Line	6.38	90	90	33.69	20.48	195.45	39	22.65	195.45	45	0	N/A	N/A	N/A	N/A	N/A	6.38035	70.1166
231	1280 (Aligned) (cropped)	Lines 4	Lines	78	-1:-1:-1.821 on	46200	Line	8.78	90	90	-28.07	4.58	240.28	40	8.19	240.28	32	0	N/A	N/A	N/A	N/A	N/A	8.77679	65.7127
232	1280 (Aligned) (cropped)	Lines 5	Lines	78	-1:-1:-1.821 on	46200	Line	8.75	151.09	151.26	3.24	57.6	231.12	33	61.7	238.59	35	0	N/A	N/A	N/A	N/A	N/A	8.75277	13.2087
233	1280 (Aligned) (cropped)	Lines 1	Lines	90	-1:-1:-1.821 on	53400	Line	6.79	121.23	121.33	4.25	21.69	194.73	29	27.23	198.1	31	0	N/A	N/A	N/A	N/A	N/A	6.7859	17.1413
234	1280 (Aligned) (cropped)	Lines 2	Lines	90	-1:-1:-1.821 on	53400	Line	8.06	90	90	63.43	15.91	212.08	37	16.87	212.08	45	0	N/A	N/A	N/A	N/A	N/A	8.05739	83.1572
235	1280 (Aligned) (cropped)	Lines 1	Lines	105	-1:-1:-1.821 on	62400	Line	7.3	90	90	-1.91	14.46	219.55	40	21.69	219.55	39	0	N/A	N/A	N/A	N/A	N/A	7.29883	7.87477
236	1280 (Aligned) (cropped)	Lines 2	Lines	105	-1:-1:-1.821 on	62400	Line	7.2	63.02	62.24	13.11	47.48	245.1	35	52.06	242.69	40	0	N/A	N/A	N/A	N/A	N/A	7.19614	44.0126
237	1280 (Aligned) (cropped)	Lines 3	Lines	105	-1:-1:-1.821 on	62400	Line	8.86	137.19	145.3	26.84	77.36	215.21	34	79.53	218.35	42	0	N/A	N/A	N/A	N/A	N/A	8.86389	64.4938
238	1280 (Aligned) (cropped)	Lines 4	Lines	105	-1:-1:-1.821 on	62400	Line	8.44	90	90	0	56.15	226.3	23	64.59	226.3	23	0	N/A	N/A	N/A	N/A	N/A	8.44	0
239	1280 (Aligned) (cropped)	Lines 1	Lines	124	-1:-1:-1.821 on	73800	Line	7.23	119.98	119.98	0	58.8	214.01	25	65.07	217.62	25	0	N/A	N/A	N/A	N/A	N/A	7.23498	0
240	1280 (Aligned) (cropped)	Lines 2	Lines	124	-1:-1:-1.821 on	73800	Line	10.55	90	90	-35.54	14.94	187.74	42	18.32	187.74	32	0	N/A	N/A	N/A	N/A	N/A	10.5558	71.3247
241	1280 (Aligned) (cropped)	Lines 3	Lines	124	-1:-1:-1.821 on	73800	Line	7.36	125.22	125.31	3.89	47.24	212.08	22	53.02	216.18	24	0	N/A	N/A	N/A	N/A	N/A	7.36331	15.7605
242	1280 (Aligned) (cropped)	Lines 1	Lines	146	-1:-1:-1.821 on	87000	Line	7.73	31.81	342.9	-27.23	7.23	225.58	43	6.27	222.44	36	0	N/A	N/A	N/A	N/A	N/A	7.73183	64.8702
243	1280 (Aligned) (cropped)	Lines 2	Lines	146	-1:-1:-1.821 on	87000	Line	7.47	90	90	0	56.88	204.61	24	64.35	204.61	24	0	N/A	N/A	N/A	N/A	N/A	7.47	0
244	1280 (Aligned) (cropped)	Lines 3	Lines	146	-1:-1:-1.821 on	87000	Line	9.39	90	90	-15.07	3.86	219.31	42	10.12	219.31	35	0	N/A	N/A	N/A	N/A	N/A	9.39083	48.1942
245	1280 (Aligned) (cropped)	Lines 4	Lines	146	-1:-1:-1.821 on	87000	Line	7.53	150.2	150.75	5.98	37.84	215.45	36	41.21	221.48	39	0	N/A	N/A	N/A	N/A	N/A	7.53112	23.4749
246	1280 (Aligned) (cropped)	Lines 5	Lines	146	-1:-1:-1.821 on	87000	Line	8.92	108.92	108.92	0	35.43	196.17	27	43.86	199.07	27	0	N/A	N/A	N/A	N/A	N/A	8.91487	0
247	1280 (Aligned) (cropped)	Lines 6	Lines	146	-1:-1:-1.821 on	87000	Line	7.72	118.16	118.18	-1.8	61.21	198.1	29	67.96	201.72	28	0	N/A	N/A	N/A	N/A	N/A	7.72444	7.43835
248	1280 (Aligned) (cropped)	Lines 1	Lines	73	-1:-1:-1.821 on	43200	Line	8.43	90	270	-36.03	47.24	212.56	45	44.59	212.56	37	0	N/A	N/A	N/A	N/A	N/A	8.42748	71.6725
249	1280 (Aligned) (cropped)	Lines 2	Lines	73	-1:-1:-1.821 on	43200	Line	7.03	90	90	9.46	137.85	239.31	36	143.64	239.31	40	0	N/A	N/A	N/A	N/A	N/A	7.03734	34.6385
250	1280 (Aligned) (cropped)	Lines 3	Lines	73	-1:-1:-1.821 on	43200	Line	7.88	90	270	-25.02	132.55	204.61	40	128.94	204.61	33	0	N/A	N/A	N/A	N/A	N/A	7.87605	62.7192
251	1280 (Aligned) (cropped)	Lines 4	Lines	73	-1:-1:-1.821 on	43200	Line	9.61	90	90	-2.94	155.93	234.49	25	165.33	234.49	23	0	N/A	N/A	N/A	N/A	N/A	9.61041	12.0115
252	1280 (Aligned) (cropped)	Lines 5	Lines	73	-1:-1:-1.821 on	43200	Line	8.5	90	270	-19.29	130.62	209.67	45	125.8	209.67	38	0	N/A	N/A	N/A	N/A	N/A	8.49896	55.4498
253	1280 (Aligned) (cropped)	Lines 1	Lines	93	-1:-1:-1.821 on	55200	Line	8.68	90	270	-12.99	155.44	243.41	45	149.18	243.41	39	0	N/A	N/A	N/A	N/A	N/A	8.67108	43.7851
254	1280 (Aligned) (cropped)	Lines 2	Lines	93	-1:-1:-1.821 on	55200	Line	9.26	90	90	-45	105.08	241.72	44	107.24	241.72	35	0	N/A	N/A	N/A	N/A	N/A	9.25557	76.5043
255	1280 (Aligned) (cropped)	Lines 3	Lines	93	-1:-1:-1.821 on	55200	Line	8.4	123.84	235.01	13.81	161.47	235.22	37	156.65	238.59	43	0	N/A	N/A	N/A	N/A	N/A	8.40174	45.5726
256	1280 (Aligned) (cropped)	Lines 4	Lines	93	-1:-1:-1.821 on	55200	Line	6.81	39.18	38.99	-4.23	83.14	234.01	38	87.24	228.95	36	0	N/A	N/A	N/A	N/A	N/A	6.81275	17.0716
257	1280 (Aligned) (cropped)	Lines 5	Lines	93	-1:-1:-1.821 on	55200	Line	5.2	90	90	-39.81	114.72	228.47	43	116.16	228.47	38	0	N/A	N/A	N/A	N/A	N/A	5.20323	73.9336
258	1280 (Aligned) (cropped)	Lines 6	Lines	93	-1:-1:-1.821 on	55200	Line	7.33	131.2	131.82	-8.92	142.19	203.16	41	146.77	207.26	37	0	N/A	N/A	N/A	N/A	N/A	7.33392	33.0527
259	1280 (Aligned) (cropped)	Lines 7	Lines	93	-1:-1:-1.821 on	55200	Line	10.02	90	270	-17.74	84.35	211.12	40	78.33	211.12	32	0	N/A	N/A	N/A	N/A	N/A	10.012	53.0385
260	1280 (Aligned) (cropped)	Lines 1	Lines	108	-1:-1:-1.821 on	64200	Line	6.49	111.8	111.8	0	136.16	224.85	24	142.19	227.26	24	0	N/A	N/A	N/A	N/A	N/A	6.49377	0
261	1280 (Aligned) (cropped)	Lines 2	Lines	108	-1:-1:-1.821 on	64200	Line	8.19	90	90	0	118.09	223.65	24	126.28	223.65	24	0	N/A	N/A	N/A	N/A	N/A	8.19	0
262	1280 (Aligned) (cropped)	Lines 3	Lines	108	-1:-1:-1.821 on	64200	Line	8.34	120.32	120.38	-3.4	84.35	231.12	26	91.34	235.22	24	0	N/A	N/A	N/A	N/A	N/A	8.34686	13.8636
263	1280 (Aligned) (cropped)	Lines 4	Lines	108	-1:-1:-1.821 on	64200	Line	7.04	90	270	-66.8	126.28	230.64	49	125.56	230.64	42	0	N/A	N/A	N/A	N/A	N/A	7.03693	84.1274
264	1280 (Aligned) (cropped)	Lines 5	Lines	108	-1:-1:-1.821 on	64200	Line	10	90	N/A	N/A	104.83	224.37	41	104.83	224.37	31	0	N/A	N/A	N/A	N/A	N/A	10	90
265	1280 (Aligned) (cropped)	Lines 1	Lines	118	-1:-1:-1.821 on	70200	Line	7.88	90	270	-25.02	112.79	220.03	44	109.17	220.03	37	0	N/A	N/A	N/A	N/A	N/A	7.88063	62.6546
266	1280 (Aligned) (cropped)	Lines 2	Lines	118	-1:-1:-1.821 on	70200	Line	6.02	90	90	-71.57	140.98	218.35	45	141.47	218.35	39	0	N/A	N/A	N/A	N/A	N/A	6.01998	85.3312
267	1280 (Aligned) (cropped)	Lines 3	Lines	118	-1:-1:-1.821 on	70200	Line	7.88	90	90	-25.02	147.01	199.07	40	150.63	199.07	33	0	N/A	N/A	N/A	N/A	N/A	7.88063	62.6546
268	1280 (Aligned) (cropped)	Lines 1	Lines	129	-1:-1:-1.821 on	76800	Line	7.26	90	270	-41.19	131.1	222.92	49	129.18	222.92	42	0	N/A	N/A	N/A	N/A	N/A	7.25854	74.6618
269	1280 (Aligned) (cropped)	Lines 2	Lines	129	-1:-1:-1.821 on	76800	Line	8.75	133.86	133.88	-1.59	138.57	229.91	26	144.84	235.94	25	0	N/A	N/A	N/A	N/A	N/A	8.75636	6.55764
270	1280 (Aligned) (cropped)	Lines 3	Lines	129	-1:-1:-1.821 on	76800	Line	10.01	90	90	-7.91	105.8	228.95	30	114.47	228.95	25	0	N/A	N/A	N/A	N/A	N/A	10.0084	29.9721
271	1280 (Aligned) (cropped)	Lines 1	Lines	146	-1:-1:-1.821 on	87000	Line	7.72	65.87	65.85	-1.8	154.48	219.31	27	161.47	216.18	26	0	N/A	N/A	N/A	N/A	N/A	7.72379	7.43897
272	1280 (Aligned) (cropped)	Lines 2	Lines	146	-1:-1:-1.821 on	87000	Line	7.1	90	90	-54.46	155.93	212.56	43	157.13	212.56	36	0	N/A	N/A	N/A	N/A	N/A	7.10211	80.2724
273	1280 (Aligned) (cropped)	Lines 3	Lines	146	-1:-1:-1.821 on	87000	Line	10.16	90	90	-17.1	111.82	211.36	45	118.09	211.36	37	0	N/A	N/A	N/A	N/A	N/A	10.1643	51.9124
274	1280 (Aligned) (cropped)	Lines 4	Lines	146	-1:-1:-1.821 on	87000	Line	10.21	90	270	-24.23	85.31	238.11	39	80.49	238.11	30	0	N/A	N/A	N/A	N/A	N/A	10.2094	61.8285
275	1280 (Aligned) (cropped)	Lines 5	Lines	146	-1:-1:-1.821 on	87000	Line	6.74	139.36	139.4	-2.07	85.07	211.12	27	89.41	216.18	26	0	N/A	N/A	N/A	N/A	N/A	6.74086	8.53126
276	1280 (Aligned) (cropped)	Lines 1	Lines	24	-1:-1:-1.821 on	13800	Line	6.3	90	270	-36.87	114.72	231.84	46	112.79	231.84	40	0	N/A	N/A	N/A	N/A	N/A	6.30277	72.1687
277	1280 (Aligned) (cropped)	Lines 2	Lines	24	-1:-1:-1.821 on	13800	Line	6.86	161.57	161.57	0	186.05	213.53	35	188.22	220.03	35	0	N/A	N/A	N/A	N/A	N/A	6.85266	0
278	1280 (Aligned) (cropped)	Lines 1	Lines	61	-1:-1:-1.821 on	36000	Line	8.32	136.49	161.57	-40.14	198.34	221	41	199.07	223.17	33	0	N/A	N/A	N/A	N/A	N/A	8.32117	74.0296
279	1280 (Aligned) (cropped)	Lines 2	Lines	61	-1:-1:-1.821 on	36000	Line	6.79	16.5	343.5	0	181.95	196.66	27	180.03	190.15	27	0	N/A	N/A	N/A	N/A	N/A	6.78723	0
280	1280 (Aligned) (cropped)	Lines 1	Lines	127	-1:-1:-1.821 on	75600	Line	8	90	270	-82.87	213.77	227.02	42	213.53	227.02	34	0	N/A	N/A	N/A	N/A	N/A	8.0036	88.2816
281	1280 (Aligned) (cropped)	Lines 2	Lines	127	-1:-1:-1.821 on	75600	Line	7.27	90	90	-19.44	193.04	237.87	42	197.14	237.87	36	0	N/A	N/A	N/A	N/A	N/A	7.26705	55.6539
282	1280 (Aligned) (cropped)	Lines 3	Lines	127	-1:-1:-1.821 on	75600	Line	8.53	15.02	353.16	-13.4	242.69	238.59	42	241.96	232.57	36	0	N/A	N/A	N/A	N/A	N/A	8.53073	44.6956
283	1280 (Aligned) (cropped)	Lines 4	Lines	127	-1:-1:-1.821 on	75600	Line	8.09	90	90	-57.99	167.74	196.17	38	168.94	196.17	30	0	N/A	N/A	N/A	N/A	N/A	8.0895	81.4692
284	1280 (Aligned) (cropped)	Lines 5	Lines	127	-1:-1:-1.821 on	75600	Line	9	90	90	-83.66	191.6	198.82	42	191.84	198.82	33	0	N/A	N/A	N/A	N/A	N/A	9.0032	88.4725
285	1280 (Aligned) (cropped)	Lines 6	Lines	127	-1:-1:-1.821 on	75600	Line	7.97	90	90	3.58	230.64	226.3	36	238.35	226.3	38	0	N/A	N/A	N/A	N/A	N/A	7.96518	14.5422
286	1280 (Aligned) (cropped)	Lines 1	Lines	140	-1:-1:-1.821 on	83400	Line	7.72	104.47	104.47	0	220.51	221.72	32	227.99	223.65	32	0	N/A	N/A	N/A	N/A	N/A	7.72498	0
287	1280 (Aligned) (cropped)	Lines 2	Lines	140	-1:-1:-1.821 on	83400	Line	9.34	90	90	-6.52	193.04	226.3	39	201.48	226.3	35	0	N/A	N/A	N/A	N/A	N/A	9.33989	25.3578
288	1280 (Aligned) (cropped)	Lines 3	Lines	140	-1:-1:-1.821 on	83400	Line	7.99	90	90	-23.63	174.97	229.91	42	178.82	229.91	35	0	N/A	N/A	N/A	N/A	N/A	7.9889	61.1892
289	1280 (Aligned) (cropped)	Lines 1	Lines	146	-1:-1:-1.821 on	87000	Line	8.97	120.7	120.7	0	203.4	224.37	27	211.12	228.95	27	0	N/A	N/A	N/A	N/A	N/A	8.97635	0
290	1280 (Aligned) (cropped)	Lines 2	Lines	146	-1:-1:-1.821 on	87000	Line	7.38	90	90	6.12	172.56	198.1	35	179.3	198.1	38	0	N/A	N/A	N/A	N/A	N/A	7.37751	23.994
291	1280 (Aligned) (cropped)	Lines 1	Lines	146	-1:-1:-1.821 on	87000	Line	11.54	90	90	16.7	169.18	234.73	30	176.41	234.73	39	0	N/A	N/A	N/A	N/A	N/A	11.5444	51.2239
292	1280 (Aligned) (cropped)	Lines 2	Lines	146	-1:-1:-1.821 on	87000	Line	8.92	22.43	22.38	-1.56	171.59	227.02	26	174.97	218.83	25	0	N/A	N/A	N/A	N/A	N/A	8.91631	6.4395
293	1280 (Aligned) (cropped)	Lines 1	Lines	146	-1:-1:-1.821 on	87000	Line	8.77	110.47	110.56	-5.02	179.3	192.08	38	187.02	194.97	35	0	N/A	N/A	N/A	N/A	N/A	8.77214	19.9983
Item	Source	Length xyz	Length xy	Height	ND.T	ND.Z	ND.M	Comment		sin theta	angle_radians	angle_degrees
1	Movie1_Position4	9.43	9.38	1	0	0	0			0.106045	0.106244	6.08735
2	Movie1_Position4	6.32	5.56	3	0	0	0			0.474684	0.494604	28.3387
3	Movie1_Position4	9.21	9.16	1	0	0	0			0.108578	0.108792	6.23333
4	Movie1_Position4	9.22	9.22	0	0	0	0			0	0	0
5	Movie1_Position4	7.38	7.31	1	0	0	0			0.135501	0.135919	7.78761
6	Movie1_Position4	8.55	8.55	0	0	0	0			0	0	0
7	Movie1_Position4	8.51	8.51	0	0	0	0			0	0	0
8	Movie1_Position4	9.59	5.29	8	0	0	0			0.834202	0.986685	56.5329
9	Movie1_Position4	8.34	6.68	5	0	0	0			0.59952	0.642902	36.8356
10	Movie1_Position4	6.14	6.14	0	0	0	0			0	0	0
11	Movie1_Position4	9.83	9.62	2	0	0	0			0.203459	0.204889	11.7393
12	Movie1_Position4	7.6	5.72	5	0	0	0			0.657895	0.71802	41.1395
13	Movie1_Position4	7.41	7.41	0	0	0	0			0	0	0
14	Movie1_Position4	8.61	8.55	1	0	0	0			0.116144	0.116407	6.66961
15	Movie1_Position4	6.36	3.93	5	0	0	0			0.786164	0.904577	51.8284
16	Movie1_Position4	7.27	7.2	1	0	0	0			0.137552	0.137989	7.90619
17	Movie1_Position4	9.55	9.34	2	0	0	0			0.209424	0.210986	12.0886
18	Movie1_Position4	9.16	4.46	8	0	0	0			0.873362	1.06206	60.8518
19	Movie1_Position4	8.41	6.76	5	0	0	0			0.59453	0.636681	36.4792
20	Movie1_Position4	8.74	3.52	8	0	0	0			0.915332	1.15633	66.2529
21	Movie1_Position4	8.13	8.07	1	0	0	0			0.123001	0.123314	7.06534
22	Movie1_Position4	6.84	6.54	2	0	0	0			0.292398	0.296733	17.0016
23	Movie1_Position4	9.48	9.42	1	0	0	0			0.105485	0.105682	6.05512
24	Movie1_Position4	7.18	6.89	2	0	0	0			0.278552	0.282286	16.1738
25	Movie1_Position4	8.74	8.5	2	0	0	0			0.228833	0.230879	13.2284
26	Movie1_Position4	10.01	10.01	0	0	0	0			0	0	0
27	Movie1_Position4	8.78	8.55	2	0	0	0			0.22779	0.229808	13.167
28	Movie1_Position4	9.42	9.36	1	0	0	0			0.106157	0.106358	6.09384
29	Movie1_Position4	9.61	9.56	1	0	0	0			0.104058	0.104247	5.97291
30	Movie1_Position4	9.4	8.91	3	0	0	0			0.319149	0.324831	18.6115
31	Movie1_Position4	8.87	8.64	2	0	0	0			0.225479	0.227435	13.0311
32	Movie1_Position4	8.48	8.48	0	0	0	0			0	0	0
33	Movie1_Position4	9.36	8.87	3	0	0	0			0.320513	0.326271	18.6939
34	Movie1_Position4	9.29	9.24	1	0	0	0			0.107643	0.107852	6.17944
35	Movie1_Position4	7.06	7.06	0	0	0	0			0	0	0
36	Movie1_Position4	8.22	7.98	2	0	0	0			0.243309	0.245776	14.0819
37	Movie1_Position4	8.73	8.67	1	0	0	0			0.114548	0.1148	6.57753
38	Movie1_Position4	7.09	5.86	4	0	0	0			0.564175	0.599434	34.345
39	Movie1_Position4	6.27	6.19	1	0	0	0			0.15949	0.160174	9.17727
40	Movie1_Position4	8.54	8.48	1	0	0	0			0.117096	0.117365	6.72454
41	Movie1_Position4	6.58	6.5	1	0	0	0			0.151976	0.152567	8.74144
1	Movie1_Position5	7.6	7.33	2	0	0	0			0.263158	0.266294	15.2575
2	Movie1_Position5	6.69	5.36	4	0	0	0			0.597907	0.640888	36.7202
3	Movie1_Position5	6.49	4.14	5	0	0	0			0.770416	0.879493	50.3913
4	Movie1_Position5	8.57	8.51	1	0	0	0			0.116686	0.116953	6.70089
5	Movie1_Position5	8.34	7.31	4	0	0	0			0.479616	0.500217	28.6603
6	Movie1_Position5	7.6	7.33	2	0	0	0			0.263158	0.266294	15.2575
7	Movie1_Position5	6.55	5.83	3	0	0	0			0.458015	0.475761	27.2591
8	Movie1_Position5	7.45	5.52	5	0	0	0			0.671141	0.735747	42.1552
9	Movie1_Position5	8.18	8.18	0	0	0	0			0	0	0
10	Movie1_Position5	10.12	1.54	10	0	0	0			0.988142	1.41665	81.1678
11	Movie1_Position5	8.11	7.86	2	0	0	0			0.246609	0.24918	14.2769
12	Movie1_Position5	6.79	6.09	3	0	0	0			0.441826	0.457633	26.2205
13	Movie1_Position5	9.45	6.35	7	0	0	0			0.740741	0.834172	47.7946
14	Movie1_Position5	9.88	7.84	6	0	0	0			0.607287	0.652642	37.3936
15	Movie1_Position5	7.68	6.56	4	0	0	0			0.520833	0.547827	31.3882
16	Movie1_Position5	8.44	2.69	8	0	0	0			0.947867	1.24648	71.4178
17	Movie1_Position5	5.61	5.52	1	0	0	0			0.178253	0.179211	10.268
18	Movie1_Position5	8.17	8.17	0	0	0	0			0	0	0
19	Movie1_Position5	7.33	2.18	7	0	0	0			0.95498	1.26959	72.7422
20	Movie1_Position5	8.52	2.93	8	0	0	0			0.938967	1.21962	69.8788
21	Movie1_Position5	7	6.93	1	0	0	0			0.142857	0.143348	8.21321
22	Movie1_Position5	7.3	6.11	4	0	0	0			0.547945	0.579906	33.2262
23	Movie1_Position5	8.6	7	5	0	0	0			0.581395	0.620443	35.5487
24	Movie1_Position5	7.32	7.25	1	0	0	0			0.136612	0.137041	7.85185
25	Movie1_Position5	9.51	3.08	9	0	0	0			0.946372	1.24182	71.1508
26	Movie1_Position5	10.01	4.37	9	0	0	0			0.899101	1.11771	64.0401
27	Movie1_Position5	8.79	3.65	8	0	0	0			0.910125	1.14359	65.5227
28	Movie1_Position5	8.28	7.25	4	0	0	0			0.483092	0.504182	28.8875
29	Movie1_Position5	7.94	7.88	1	0	0	0			0.125945	0.12628	7.23531
30	Movie1_Position5	7	5.75	4	0	0	0			0.571429	0.608246	34.8499

## Sheet: E14LpLive
ID	Item Name	Name	Population	Timepoint	Abs. Time	Rel. Time (s)	Type	Total Line Length (um)	Angle (degrees)	Bearing (degrees)	Elevation (degrees)	Start Position X	Start Position Y	Start Position Z	End Position X	End Position Y	End Position Z	Line Width (um)	Parent ID	Intensity	Distance (um)	Distance	Normalized Distance		line_length_um	division_angle_degrees	division_angles
1	1340 aligned	Lines 1	Lines	9	-1:-1:-1.355 on	14082.9	Line	19.74	46.85	46.85	0	70.65	110.7	41	85.05	97.2	41	0	N/A	N/A	N/A	N/A	N/A		19.7385	0	0
2	1340 aligned	Lines 2	Lines	9	-1:-1:-1.355 on	14082.9	Line	21.98	71.98	71.94	3.55	123.75	55.8	41	144.45	49.05	44	0	N/A	N/A	N/A	N/A	N/A		21.9785	7.84521	7.84521
3	1340 aligned	Lines 3	Lines	9	-1:-1:-1.355 on	14082.9	Line	20.09	47.74	47.73	-1.28	23.4	133.2	32	38.25	119.7	31	0	N/A	N/A	N/A	N/A	N/A		20.0941	-2.85255	2.85255
4	1340 aligned	Lines 1	Lines	16	-1:-1:-1.161 on	17333.7	Line	11.16	90	90	42.27	48.15	62.55	35	53.1	62.55	45	0	N/A	N/A	N/A	N/A	N/A		11.1581	63.6646	63.6646
5	1340 aligned	Lines 2	Lines	16	-1:-1:-1.161 on	17333.7	Line	16.85	90	90	-9.73	23.4	14.4	44	39.15	14.4	38	0	N/A	N/A	N/A	N/A	N/A		16.8542	-20.8545	20.8545
6	1340 aligned	Lines 1	Lines	27	-1:-1:-1.909 on	14098.5	Line	23.08	40.29	40.24	2.24	35.55	119.7	32	50.4	102.15	34	0	N/A	N/A	N/A	N/A	N/A		23.0765	4.97196	4.97196
7	1340 aligned	Lines 2	Lines	27	-1:-1:-1.909 on	14098.5	Line	16.2	90	90	0	99	116.55	27	115.2	116.55	27	0	N/A	N/A	N/A	N/A	N/A		16.2	0	0
8	1340 aligned	Lines 1	Lines	29	-1:-1:-1.057 on	15027.6	Line	23.58	69.84	69.83	2.19	101.7	93.6	29	123.75	85.5	31	0	N/A	N/A	N/A	N/A	N/A		23.5757	4.86643	4.86643
9	1340 aligned	Lines 2	Lines	29	-1:-1:-1.057 on	15027.6	Line	8.84	90	90	30.26	58.95	43.65	34	64.35	43.65	41	0	N/A	N/A	N/A	N/A	N/A		8.84081	52.3524	52.3524
10	1340 aligned	Lines 3	Lines	29	-1:-1:-1.057 on	15027.6	Line	10.76	90	90	-26.57	22.05	4.05	39	29.25	4.05	31	0	N/A	N/A	N/A	N/A	N/A		10.7629	-48.0128	48.0128
11	1340 aligned	Lines 1	Lines	77	-1:-1:-1.749 on	22024.3	Line	12.89	51.33	46.97	23.68	86.85	46.35	32	93.6	40.05	41	0	N/A	N/A	N/A	N/A	N/A		12.8939	44.2671	44.2671
12	1340 aligned	Lines 2	Lines	77	-1:-1:-1.749 on	22024.3	Line	9.4	90	90	56.31	139.5	4.5	39	142.2	4.5	48	0	N/A	N/A	N/A	N/A	N/A		9.39628	73.3008	73.3008
13	1340 aligned	Lines 3	Lines	77	-1:-1:-1.749 on	22024.3	Line	12.41	90	90	-25.35	24.3	22.95	40	32.85	22.95	31	0	N/A	N/A	N/A	N/A	N/A		12.4138	-46.4688	46.4688
14	1340 aligned	Lines 4	Lines	77	-1:-1:-1.749 on	22024.3	Line	19.59	175.79	178.67	-3.99	103.5	24.3	30	103.95	43.65	27	0	N/A	N/A	N/A	N/A	N/A		19.5863	-8.81056	8.81056
15	1340 aligned	Lines 1	Lines	9	-1:-1:-1.355 on	14082.9	Line	18.83	54.83	54.78	2.75	166.95	85.5	26	182.25	74.7	28	0	N/A	N/A	N/A	N/A	N/A		18.8343	6.0957	6.0957
16	1340 aligned	Lines 2	Lines	9	-1:-1:-1.355 on	14082.9	Line	14.9	121.92	122.2	7.15	268.65	76.05	35	280.8	83.7	39	0	N/A	N/A	N/A	N/A	N/A		14.9045	15.5676	15.5676
17	1340 aligned	Lines 1	Lines	26	-1:-1:-1.270 on	13633.8	Line	19.31	90	90	9.93	284.4	13.05	34	302.4	13.05	41	0	N/A	N/A	N/A	N/A	N/A		19.3132	21.2505	21.2505
18	1340 aligned	Lines 2	Lines	26	-1:-1:-1.270 on	13633.8	Line	11.08	90	90	74.74	209.25	128.25	27	210.6	128.25	38	0	N/A	N/A	N/A	N/A	N/A		11.0825	83.0032	83.0032
19	1340 aligned	Lines 3	Lines	26	-1:-1:-1.270 on	13633.8	Line	16.76	71.84	71.57	9.79	270	57.15	34	284.85	52.2	40	0	N/A	N/A	N/A	N/A	N/A		16.7638	20.9721	20.9721
20	1340 aligned	Lines 1	Lines	8	-1:-1:-1.615 on	67117.2	Line	9.04	90	270	-77.47	237.6	7.65	43	236.7	7.65	34	0	N/A	N/A	N/A	N/A	N/A		9.04489	-84.2894	84.2894
21	1340 aligned	Lines 2	Lines	8	-1:-1:-1.615 on	67117.2	Line	14.77	90	90	11.31	287.1	51.3	32	300.6	51.3	38	0	N/A	N/A	N/A	N/A	N/A		14.7733	23.9625	23.9625
22	1340 aligned	Lines 3	Lines	8	-1:-1:-1.615 on	67117.2	Line	10.25	90	90	63.43	152.1	2.7	36	154.35	2.7	46	0	N/A	N/A	N/A	N/A	N/A		10.25	77.3196	77.3196
23	1340 aligned	Lines 4	Lines	8	-1:-1:-1.615 on	67117.2	Line	12.73	90	90	-24.23	428.4	119.25	43	437.4	119.25	34	0	N/A	N/A	N/A	N/A	N/A		12.7279	-45	45
24	1340 aligned	Lines 5	Lines	8	-1:-1:-1.615 on	67117.2	Line	16.63	77.48	77.47	-1.55	298.35	33.75	28	314.55	30.15	27	0	N/A	N/A	N/A	N/A	N/A		16.6253	-3.44839	3.44839
25	1340 aligned	Lines 1	Lines	30	-1:-1:-1.323 on	15491.9	Line	16.8	90	90	-18.43	432	119.25	44	445.5	119.25	34	0	N/A	N/A	N/A	N/A	N/A		16.8003	-36.5289	36.5289
26	1340 aligned	Lines 2	Lines	30	-1:-1:-1.323 on	15491.9	Line	17.23	147.23	149.04	11.31	401.4	118.35	33	409.5	131.85	40	0	N/A	N/A	N/A	N/A	N/A		17.2296	23.9712	23.9712
27	1340 aligned	Lines 1	Lines	66	-1:-1:-1.359 on	16914.9	Line	20.55	127.86	232.13	1.26	445.5	121.95	27	429.3	134.55	28	0	N/A	N/A	N/A	N/A	N/A		20.5475	2.78956	2.78956
28	1340 aligned	Lines 2	Lines	66	-1:-1:-1.359 on	16914.9	Line	19.9	90	90	-2.6	325.8	11.7	24	345.6	11.7	22	0	N/A	N/A	N/A	N/A	N/A		19.9008	-5.76789	5.76789
29	1340 aligned	Lines 3	Lines	66	-1:-1:-1.359 on	16914.9	Line	10.5	90	90	36.87	410.85	4.5	24	416.25	4.5	33	0	N/A	N/A	N/A	N/A	N/A		10.4957	59.0362	59.0362
30	1340 aligned	Lines 1	Lines	78	-1:-1:-1.835 on	22487.4	Line	13.38	90	90	22.25	429.75	7.65	29	439.65	7.65	38	0	N/A	N/A	N/A	N/A	N/A		13.3795	42.2737	42.2737
31	1340 aligned	Lines 2	Lines	78	-1:-1:-1.835 on	22487.4	Line	18.95	115.34	115.35	-1.36	442.35	92.25	29	459.45	100.35	28	0	N/A	N/A	N/A	N/A	N/A		18.9478	-3.02528	3.02528
32	1340 aligned	Lines 1	Lines	4	-1:-1:-1.692 on	11760.2	Line	14.4	152.92	206.57	-5.47	434.7	27.45	32	428.4	40.05	29	0	N/A	N/A	N/A	N/A	N/A		14.4031	-12.0221	12.0221
33	1340 aligned	Lines 2	Lines	4	-1:-1:-1.692 on	11760.2	Line	14.02	90	90	14.53	373.95	25.2	32	386.1	25.2	39	0	N/A	N/A	N/A	N/A	N/A		14.0222	29.9476	29.9476
34	1340 aligned	Lines 3	Lines	4	-1:-1:-1.692 on	11760.2	Line	11.08	90	90	-74.74	138.15	217.35	40	139.5	217.35	29	0	N/A	N/A	N/A	N/A	N/A		11.0825	-83.0032	83.0032
35	1340 aligned	Lines 4	Lines	4	-1:-1:-1.692 on	11760.2	Line	13.96	48.19	47.73	7.66	63.9	199.8	35	73.8	190.8	39	0	N/A	N/A	N/A	N/A	N/A		13.9646	16.6449	16.6449
36	1340 aligned	Lines 1	Lines	2	-1:-1:-1.993 on	10830.5	Line	15.12	90	90	-18.43	82.8	238.05	38	94.95	238.05	29	0	N/A	N/A	N/A	N/A	N/A		15.1203	-36.5289	36.5289
37	1340 aligned	Lines 2	Lines	2	-1:-1:-1.993 on	10830.5	Line	17.33	49.84	49.4	-7.72	2.25	151.2	45	14.85	140.4	40	0	N/A	N/A	N/A	N/A	N/A		17.3321	-16.7671	16.7671
38	1340 aligned	Lines 3	Lines	2	-1:-1:-1.993 on	10830.5	Line	11.53	90	90	-29.36	74.25	150.3	44	81.45	150.3	35	0	N/A	N/A	N/A	N/A	N/A		11.5256	-51.3402	51.3402
39	1340 aligned	Lines 4	Lines	2	-1:-1:-1.993 on	10830.5	Line	8.44	90	90	-53.13	148.05	149.4	41	150.75	149.4	33	0	N/A	N/A	N/A	N/A	N/A		8.44334	-71.3505	71.3505
40	1340 aligned	Lines 5	Lines	2	-1:-1:-1.993 on	10830.5	Line	10.73	90	90	34.7	278.55	197.1	30	284.4	197.1	39	0	N/A	N/A	N/A	N/A	N/A		10.7342	56.9761	56.9761
41	1340 aligned	Lines 1	Lines	23	-1:-1:-1.629 on	12240.2	Line	18.45	90	90	0	273.6	200.7	24	292.05	200.7	24	0	N/A	N/A	N/A	N/A	N/A		18.45	0	0
42	1340 aligned	Lines 2	Lines	23	-1:-1:-1.629 on	12240.2	Line	22.04	105.45	105.46	2.35	258.3	143.1	24	279.45	148.95	26	0	N/A	N/A	N/A	N/A	N/A		22.0351	5.20758	5.20758
43	1340 aligned	Lines 3	Lines	23	-1:-1:-1.629 on	12240.2	Line	11.33	90	90	61.39	207.9	129.15	27	210.6	129.15	38	0	N/A	N/A	N/A	N/A	N/A		11.3265	76.2091	76.2091
44	1340 aligned	Lines 4	Lines	23	-1:-1:-1.629 on	12240.2	Line	10.09	90	90	73.3	178.2	189.9	29	179.55	189.9	39	0	N/A	N/A	N/A	N/A	N/A		10.0907	82.3116	82.3116
45	1340 aligned	Lines 1	Lines	2	-1:-1:-1.993 on	10830.5	Line	9.04	90	90	77.47	189.45	179.1	30	190.35	179.1	39	0	N/A	N/A	N/A	N/A	N/A		9.04489	84.2894	84.2894
46	1340 aligned	Lines 2	Lines	2	-1:-1:-1.993 on	10830.5	Line	15.55	16.94	16.86	1.66	346.95	225.45	27	351.45	210.6	28	0	N/A	N/A	N/A	N/A	N/A		15.549	3.68739	3.68739
47	1340 aligned	Lines 3	Lines	2	-1:-1:-1.993 on	10830.5	Line	11.5	36.97	330.64	-23.55	428.4	234.45	41	424.35	227.25	33	0	N/A	N/A	N/A	N/A	N/A		11.4997	-44.0808	44.0808
48	1340 aligned	Lines 1	Lines	7	-1:-1:-1.145 on	13153.7	Line	13.96	131.81	132.27	-7.66	427.05	134.1	40	436.95	143.1	36	0	N/A	N/A	N/A	N/A	N/A		13.9646	-16.6449	16.6449
49	1340 aligned	Lines 2	Lines	7	-1:-1:-1.145 on	13153.7	Line	16.45	99.46	99.46	1.57	325.8	173.7	26	342	176.4	27	0	N/A	N/A	N/A	N/A	N/A		16.4539	3.48435	3.48435
50	1340 aligned	Lines 1	Lines	12	-1:-1:-1.645 on	15477.2	Line	13.62	73.76	73.5	-10.07	346.5	226.8	40	358.65	223.2	35	0	N/A	N/A	N/A	N/A	N/A		13.6229	-21.5326	21.5326
51	1340 aligned	Lines 2	Lines	12	-1:-1:-1.645 on	15477.2	Line	14.27	90	90	-5.53	433.35	163.35	40	447.3	163.35	37	0	N/A	N/A	N/A	N/A	N/A		14.2689	-12.1368	12.1368
52	1340 aligned	Lines 3	Lines	12	-1:-1:-1.645 on	15477.2	Line	18.95	72	72	1.36	389.7	213.3	30	407.7	207.45	31	0	N/A	N/A	N/A	N/A	N/A		18.9532	3.02442	3.02442
53	1340 aligned	Lines 1	Lines	23	-1:-1:-1.629 on	12240.2	Line	22.39	66.84	66.64	-7.14	362.25	224.55	40	382.05	216	34	0	N/A	N/A	N/A	N/A	N/A		22.3862	-15.5466	15.5466
54	1340 aligned	Lines 2	Lines	23	-1:-1:-1.629 on	12240.2	Line	11.53	90	90	-29.36	453.15	199.8	46	460.35	199.8	37	0	N/A	N/A	N/A	N/A	N/A		11.5256	-51.3402	51.3402
55	1340 aligned	Lines 3	Lines	23	-1:-1:-1.629 on	12240.2	Line	13.55	90	90	12.53	436.05	234.45	40	448.2	234.45	46	0	N/A	N/A	N/A	N/A	N/A		13.5507	26.2814	26.2814
56	1340 aligned	Lines 1	Lines	36	-1:-1:-1.190 on	66215.8	Line	11.91	54.74	52.59	18.11	445.95	171.9	35	453.6	166.05	42	0	N/A	N/A	N/A	N/A	N/A		11.9057	36.012	36.012
57	1340 aligned	Lines 2	Lines	36	-1:-1:-1.190 on	66215.8	Line	11.81	90	90	-27.9	443.25	208.35	42	450.9	208.35	33	0	N/A	N/A	N/A	N/A	N/A		11.812	-49.6355	49.6355
58	1340 aligned	Lines 1	Lines	4	-1:-1:-1.692 on	11760.2	Line	8.11	90	90	69.44	455.85	206.1	34	457.2	206.1	42	0	N/A	N/A	N/A	N/A	N/A		8.11311	80.4216	80.4216
59	1340 aligned	Lines 2	Lines	4	-1:-1:-1.692 on	11760.2	Line	12.17	25.24	18.43	17.55	443.7	185.4	35	446.85	175.95	42	0	N/A	N/A	N/A	N/A	N/A		12.1748	35.0968	35.0968
60	1340 aligned	Lines 3	Lines	4	-1:-1:-1.692 on	11760.2	Line	11.53	90	90	-29.36	61.2	270.9	37	68.4	270.9	28	0	N/A	N/A	N/A	N/A	N/A		11.5256	-51.3402	51.3402
61	1340 aligned	Lines 4	Lines	4	-1:-1:-1.692 on	11760.2	Line	13.99	130.35	131.99	-14.58	104.85	265.95	38	113.85	274.05	31	0	N/A	N/A	N/A	N/A	N/A		13.9861	-30.033	30.033
62	1340 aligned	Lines 1	Lines	7	-1:-1:-1.145 on	13153.7	Line	13.52	53.96	51.71	-18.29	84.15	240.3	38	92.7	233.55	30	0	N/A	N/A	N/A	N/A	N/A		13.5154	-36.2933	36.2933
63	1340 aligned	Lines 2	Lines	7	-1:-1:-1.145 on	13153.7	Line	12.38	90	90	-20.85	127.35	245.25	42	136.8	245.25	34	0	N/A	N/A	N/A	N/A	N/A		12.3815	-40.2499	40.2499
64	1340 aligned	Lines 1	Lines	3	-1:-1:-1.772 on	11295.3	Line	12.62	45.77	43.26	-16.69	121.05	314.1	42	128.25	306.45	35	0	N/A	N/A	N/A	N/A	N/A		12.6239	-33.6766	33.6766
65	1340 aligned	Lines 2	Lines	3	-1:-1:-1.772 on	11295.3	Line	15.31	90	90	-15.42	111.6	260.55	28	124.65	260.55	20	0	N/A	N/A	N/A	N/A	N/A		15.3069	-31.5094	31.5094
66	1340 aligned	Lines 3	Lines	3	-1:-1:-1.772 on	11295.3	Line	11.25	90	90	0	157.5	353.7	28	168.75	353.7	28	0	N/A	N/A	N/A	N/A	N/A		11.25	0	0
67	1340 aligned	Lines 1	Lines	3	-1:-1:-1.772 on	11295.3	Line	13.62	90	90	-55.3	177.3	281.25	57	181.35	281.25	44	0	N/A	N/A	N/A	N/A	N/A		13.6163	-72.6962	72.6962
68	1340 aligned	Lines 2	Lines	3	-1:-1:-1.772 on	11295.3	Line	10.18	90	90	-29.74	266.85	287.1	40	273.15	287.1	32	0	N/A	N/A	N/A	N/A	N/A		10.1828	-51.7796	51.7796
69	1340 aligned	Lines 3	Lines	3	-1:-1:-1.772 on	11295.3	Line	11.59	90	90	37.57	280.8	299.25	33	286.65	299.25	43	0	N/A	N/A	N/A	N/A	N/A		11.5854	59.6724	59.6724
70	1340 aligned	Lines 1	Lines	8	-1:-1:-1.615 on	67117.2	Line	16.71	50.49	43.26	-29.11	174.15	287.1	57	181.35	279.45	44	0	N/A	N/A	N/A	N/A	N/A		16.7141	-51.0582	51.0582
71	1340 aligned	Lines 2	Lines	8	-1:-1:-1.615 on	67117.2	Line	17.5	124.5	124.51	1.48	132.3	245.7	22	146.7	255.6	23	0	N/A	N/A	N/A	N/A	N/A		17.5034	3.27519	3.27519
72	1340 aligned	Lines 3	Lines	8	-1:-1:-1.615 on	67117.2	Line	13	69.69	69.68	-1.99	234	275.85	28	246.15	271.35	27	0	N/A	N/A	N/A	N/A	N/A		12.9951	-4.41339	4.41339
73	1340 aligned	Lines 4	Lines	8	-1:-1:-1.615 on	67117.2	Line	17.27	90	270	-13.24	289.35	276.3	41	274.05	276.3	33	0	N/A	N/A	N/A	N/A	N/A		17.2653	-27.604	27.604
74	1340 aligned	Lines 5	Lines	8	-1:-1:-1.615 on	67117.2	Line	15.7	50.85	50.83	-1.64	191.25	251.55	25	203.4	241.65	24	0	N/A	N/A	N/A	N/A	N/A		15.7045	-3.65083	3.65083
75	1340 aligned	Lines 1	Lines	24	-1:-1:-1.948 on	12704.5	Line	13	108.41	109.18	16.04	209.7	336.15	33	220.05	339.75	40	0	N/A	N/A	N/A	N/A	N/A		13.0032	32.57	32.57
76	1340 aligned	Lines 2	Lines	24	-1:-1:-1.948 on	12704.5	Line	21.61	58.63	58.63	0	204.75	277.65	21	223.2	266.4	21	0	N/A	N/A	N/A	N/A	N/A		21.6094	0	0
77	1340 aligned	Lines 3	Lines	24	-1:-1:-1.948 on	12704.5	Line	11.05	90	90	20.22	240.3	238.5	21	248.85	238.5	28	0	N/A	N/A	N/A	N/A	N/A		11.05	39.3076	39.3076
78	1340 aligned	Lines 1	Lines	3	-1:-1:-1.772 on	11295.3	Line	21.36	27.67	27.65	-1.21	225.45	369.45	25	235.35	350.55	24	0	N/A	N/A	N/A	N/A	N/A		21.3593	-2.68345	2.68345
79	1340 aligned	Lines 2	Lines	3	-1:-1:-1.772 on	11295.3	Line	9.01	90	90	83.66	357.3	293.4	37	357.75	293.4	46	0	N/A	N/A	N/A	N/A	N/A		9.01124	87.1376	87.1376
80	1340 aligned	Lines 3	Lines	3	-1:-1:-1.772 on	11295.3	Line	14.93	90	90	-15.95	445.5	307.8	45	458.1	307.8	37	0	N/A	N/A	N/A	N/A	N/A		14.9251	-32.4123	32.4123
81	1340 aligned	Lines 1	Lines	27	-1:-1:-1.909 on	14098.5	Line	16.8	90	90	-18.43	377.1	284.4	45	390.6	284.4	35	0	N/A	N/A	N/A	N/A	N/A		16.8003	-36.5289	36.5289
82	1340 aligned	Lines 2	Lines	27	-1:-1:-1.909 on	14098.5	Line	9.31	140.24	145.3	20.78	444.6	295.65	37	448.65	301.5	43	0	N/A	N/A	N/A	N/A	N/A		9.30726	40.1401	40.1401
83	1340 aligned	Lines 3	Lines	27	-1:-1:-1.909 on	14098.5	Line	15.31	63.95	63.43	-10.85	402.75	242.1	41	415.35	235.8	35	0	N/A	N/A	N/A	N/A	N/A		15.3118	-23.07	-23.07
84	1340 aligned	Lines 1	Lines	67	-1:-1:-1.635 on	17379.2	Line	9.04	90	90	-77.47	452.25	301.95	43	453.15	301.95	34	0	N/A	N/A	N/A	N/A	N/A		9.04489	-84.2894	84.2894
85	1340 aligned	Lines 2	Lines	67	-1:-1:-1.635 on	17379.2	Line	22.6	54.73	54.73	0	441.9	302.85	30	460.35	289.8	30	0	N/A	N/A	N/A	N/A	N/A		22.5988	0	0
86	1340 aligned	Lines 1	Lines	19	-1:-1:-1.096 on	10382.7	Line	12.37	61.42	57.99	-25.5	434.7	337.05	40	441.9	332.55	31	0	N/A	N/A	N/A	N/A	N/A		12.373	-46.6683	46.6683
87	1340 aligned	Lines 2	Lines	19	-1:-1:-1.096 on	10382.7	Line	22.05	90	90	0	51.3	441.9	37	73.35	441.9	37	0	N/A	N/A	N/A	N/A	N/A		22.05	0	0
88	1340 aligned	Lines 3	Lines	19	-1:-1:-1.096 on	10382.7	Line	18.75	70.28	70.25	-2.76	41.4	370.35	37	58.95	364.05	35	0	N/A	N/A	N/A	N/A	N/A		18.7535	-6.12206	6.12206
89	1340 aligned	Lines 1	Lines	6	-1:-1:-1.682 on	12689.2	Line	15.75	90	90	0	35.55	452.7	36	51.3	452.7	36	0	N/A	N/A	N/A	N/A	N/A		15.75	0	0
90	1340 aligned	Lines 2	Lines	6	-1:-1:-1.682 on	12689.2	Line	11.9	90	90	-11.77	107.55	424.35	35	118.35	424.35	30	0	N/A	N/A	N/A	N/A	N/A		11.9013	-24.8424	24.8424
91	1340 aligned	Lines 3	Lines	6	-1:-1:-1.682 on	12689.2	Line	9.42	90	90	-26.57	99.9	442.8	37	106.2	442.8	30	0	N/A	N/A	N/A	N/A	N/A		9.41754	-48.0128	48.0128
92	1340 aligned	Lines 4	Lines	6	-1:-1:-1.682 on	12689.2	Line	10.12	131.16	209.05	-41.16	221.4	388.8	44	219.15	392.85	35	0	N/A	N/A	N/A	N/A	N/A		10.1225	-62.7614	62.7614
93	1340 aligned	Lines 5	Lines	6	-1:-1:-1.682 on	12689.2	Line	15.43	61.34	61.11	6.89	253.8	456.3	36	266.85	449.1	40	0	N/A	N/A	N/A	N/A	N/A		15.4319	15.0228	15.0228
94	1340 aligned	Lines 1	Lines	25	-1:-1:-1.896 on	13169.5	Line	9.63	104.74	246.8	-49.76	229.95	452.25	44	226.8	453.6	35	0	N/A	N/A	N/A	N/A	N/A		9.63042	-69.1537	69.1537
95	1340 aligned	Lines 2	Lines	25	-1:-1:-1.896 on	13169.5	Line	21.55	61.29	61.29	0	140.4	416.7	30	159.3	406.35	30	0	N/A	N/A	N/A	N/A	N/A		21.5484	0	0
96	1340 aligned	Lines 3	Lines	25	-1:-1:-1.896 on	13169.5	Line	17.66	90	90	-2.94	294.75	422.1	30	312.3	422.1	28	0	N/A	N/A	N/A	N/A	N/A		17.6636	-6.50139	6.50139
97	1340 aligned	Lines 1	Lines	13	-1:-1:-1.384 on	15941.9	Line	10.45	90	90	-17.53	285.3	420.75	40	293.85	420.75	34	0	N/A	N/A	N/A	N/A	N/A		10.4452	-35.0594	35.0594
98	1340 aligned	Lines 2	Lines	13	-1:-1:-1.384 on	15941.9	Line	17.21	45.02	45	1.5	367.65	378.9	30	379.8	366.75	31	0	N/A	N/A	N/A	N/A	N/A		17.2118	3.33075	3.33075
99	1340 aligned	Lines 3	Lines	13	-1:-1:-1.384 on	15941.9	Line	12.25	50.84	49.9	11.38	343.8	419.4	35	352.35	412.2	40	0	N/A	N/A	N/A	N/A	N/A		12.2451	24.0998	24.0998
100	1340 aligned	Lines 4	Lines	13	-1:-1:-1.384 on	15941.9	Line	14.73	49.99	49.97	1.75	324.45	387.45	31	335.7	378	32	0	N/A	N/A	N/A	N/A	N/A		14.7263	3.8937	3.8937
101	1340 aligned	Lines 1	Lines	26	-1:-1:-1.270 on	13633.8	Line	10.18	90	90	29.74	334.35	403.65	33	340.65	403.65	41	0	N/A	N/A	N/A	N/A	N/A		10.1828	51.7796	51.7796
102	1340 aligned	Lines 1	Lines	1	-1:-1:-1.440 on	0	Line	8.11	90	90	69.44	367.65	402.3	33	369	402.3	41	0	N/A	N/A	N/A	N/A	N/A		8.11311	80.4216	80.4216
ID	Item Name	Name	Population	Timepoint	Abs. Time	Rel. Time (s)	Type	Total Line Length (um)	Angle (degrees)	Bearing (degrees)	Elevation (degrees)	Start Position X	Start Position Y	Start Position Z	End Position X	End Position Y	End Position Z	Line Width (um)		line_length_um	division_angle_degrees
1	1403 (aligned) (cropped)	Lines 1	Lines	21	12:38:04.097 on 05/17/2014	12000	Line	8.51	90	90	-29.74	53.87	42.93	42	56.76	42.93	34	0		8.506	-70.1377	70.1377
2	1403 (aligned) (cropped)	Lines 2	Lines	21	12:38:04.097 on 05/17/2014	12000	Line	7.5	148.5	148.5	0	0.413	50.16	29	4.33	56.55	29	0		7.495	0	0
3	1403 (aligned) (cropped)	Lines 3	Lines	1	09:18:04.097 on 05/17/2014	0	Line	8.64	117.09	117.26	6.15	57.79	20.85	34	64.6	24.36	38	0		8.6427	27.5691	27.5691
4	1403 (aligned) (cropped)	Lines 4	Lines	1	09:18:04.097 on 05/17/2014	0	Line	9.62	109.65	110.14	12.36	22.5	49.54	32	28.69	51.81	39	0		9.61608	46.7146	46.7146
5	1403 (aligned) (cropped)	Lines 3	Lines	1	09:18:04.097 on 05/17/2014	0	Line	7.5	90	90	-1.59	15.48	40.25	38	22.91	40.25	37	0		7.49699	-7.66535	7.66535
6	1403 (aligned) (cropped)	Lines 4	Lines	1	09:18:04.097 on 05/17/2014	0	Line	8.01	90	90	-75.96	63.98	6.4	42	64.4	6.4	34	0		8.01102	-86.9947	86.9947
7	1403 (aligned) (cropped)	Lines 5	Lines	32	14:28:04.097 on 05/17/2014	18600	Line	8.17	90	270	-45	90.82	50.77	39	89.16	50.77	31	0		8.17041	-78.2775	78.2775
8	1403 (aligned) (cropped)	Lines 6	Lines	32	14:28:04.097 on 05/17/2014	18600	Line	10.25	90	270	-42.27	79.67	52.84	40	77.4	52.84	30	0		10.2544	-77.2106	77.2106
9	1403 (aligned) (cropped)	Lines 7	Lines	32	14:28:04.097 on 05/17/2014	18600	Line	9.79	67.26	293.75	16.33	79.67	20.85	34	74.51	18.58	42	0		9.78665	54.8294	54.8294
10	1403 (aligned) (cropped)	Lines 8	Lines	39	15:38:04.097 on 05/17/2014	22800	Line	7.41	12.87	12.87	0	89.78	35.09	32	91.44	27.86	32	0		7.41812	0	0
11	1403 (aligned) (cropped)	Lines 9	Lines	39	15:38:04.097 on 05/17/2014	22800	Line	9.79	143.6	143.62	1.21	116.2	50.77	38	121.98	58.62	39	0		9.79954	5.85698	5.85698
12	1403 (aligned) (cropped)	Lines 10	Lines	22	12:48:04.097 on 05/17/2014	12600	Line	8.26	90	90	-38.66	88.75	61.3	41	90.82	61.3	33	0		8.26347	-75.4929	75.4929
13	1403 (aligned) (cropped)	Lines 11	Lines	22	12:48:04.097 on 05/17/2014	12600	Line	9.61	32.68	32.66	-1.24	107.74	50.36	38	112.9	42.31	37	0		9.61395	-5.97045	5.97045
14	1403 (aligned) (cropped)	Lines 12	Lines	22	12:48:04.097 on 05/17/2014	12600	Line	8.51	90	90	-29.74	172.34	9.7	46	175.23	9.7	38	0		8.506	-70.1377	70.1377
15	1403 (aligned) (cropped)	Lines 13	Lines	22	12:48:04.097 on 05/17/2014	12600	Line	10.11	90	90	2.39	19.61	63.57	32	29.52	63.57	34	0		10.1098	11.41	11.41
16	1403 (aligned) (cropped)	Lines 14	Lines	22	12:48:04.097 on 05/17/2014	12600	Line	11.16	90	270	-50.71	39.84	82.35	41	37.98	82.35	30	0		11.1561	-80.4026	80.4026
17	1403 (aligned) (cropped)	Lines 15	Lines	22	12:48:04.097 on 05/17/2014	12600	Line	11.07	90	270	-61.39	58.41	101.34	42	57.17	101.34	31	0		11.0697	-83.5684	83.5684
18	1403 (aligned) (cropped)	Lines 16	Lines	22	12:48:04.097 on 05/17/2014	12600	Line	7.01	149.58	149.62	1.7	47.68	100.93	29	51.19	106.92	30	0		7.01429	8.19637	8.19637
19	1403 (aligned) (cropped)	Lines 17	Lines	22	12:48:04.097 on 05/17/2014	12600	Line	7.91	45.79	45	-9.56	7.22	83.8	41	11.56	79.46	36	0		7.91651	-39.1676	39.1676
20	1403 (aligned) (cropped)	Lines 18	Lines	22	12:48:04.097 on 05/17/2014	12600	Line	9.06	90	90	-60.95	62.95	64.4	40	63.98	64.4	31	0		9.05875	-83.4712	83.4712
21	1403 (aligned) (cropped)	Lines 19	Lines	65	19:58:04.097 on 05/17/2014	38400	Line	8.02	90	90	-69.44	22.29	101.76	41	22.91	101.76	33	0		8.02399	-85.5684	85.5684
22	1403 (aligned) (cropped)	Lines 20	Lines	65	19:58:04.097 on 05/17/2014	38400	Line	7.03	90	270	-66.8	67.49	85.45	41	66.87	85.45	34	0		7.0274	-84.9384	84.9384
23	1403 (aligned) (cropped)	Lines 21	Lines	65	19:58:04.097 on 05/17/2014	38400	Line	7.78	153.26	165.96	-23	14.65	60.48	42	15.48	63.78	35	0		7.78324	-64.0751	64.0751
24	1403 (aligned) (cropped)	Lines 22	Lines	65	19:58:04.097 on 05/17/2014	38400	Line	9.32	159.62	187.43	-19.03	49.33	57.38	40	48.71	62.13	32	0		9.32453	-59.0874	59.0874
25	1403 (aligned) (cropped)	Lines 23	Lines	65	19:58:04.097 on 05/17/2014	38400	Line	9.47	100.22	102.09	32.15	58.41	92.26	33	61.3	92.88	42	0		9.47294	71.8189	71.8189
26	1403 (aligned) (cropped)	Lines 24	Lines	24	13:08:04.097 on 05/17/2014	13800	Line	11.43	90	90	36.25	115.79	69.14	33	118.89	69.14	44	0		11.4285	74.2612	74.2612
27	1403 (aligned) (cropped)	Lines 25	Lines	24	13:08:04.097 on 05/17/2014	13800	Line	10.17	90	90	48.01	134.16	76.78	31	136.02	76.78	41	0		10.1715	79.4634	79.4634
28	1403 (aligned) (cropped)	Lines 26	Lines	24	13:08:04.097 on 05/17/2014	13800	Line	8.97	55.28	53.97	14.43	74.51	108.57	35	79.05	105.26	42	0		8.97595	51.2479	51.2479
29	1403 (aligned) (cropped)	Lines 27	Lines	24	13:08:04.097 on 05/17/2014	13800	Line	8.82	90	90	-15.07	120.33	59.03	41	125.7	59.03	34	0		8.82252	-52.5066	52.5066
30	1403 (aligned) (cropped)	Lines 28	Lines	39	15:38:04.097 on 05/17/2014	22800	Line	9.08	90	90	-14.04	117.85	92.47	48	123.63	92.47	41	0		9.07791	-50.453	50.453
31	1403 (aligned) (cropped)	Lines 29	Lines	39	15:38:04.097 on 05/17/2014	22800	Line	7.84	90	90	0	120.74	78.43	43	128.59	78.43	43	0		7.85	0	0
32	1403 (aligned) (cropped)	Lines 30	Lines	39	15:38:04.097 on 05/17/2014	22800	Line	6.79	160.46	160.46	0	118.89	89.16	30	121.16	95.56	30	0		6.79065	0	0
33	1403 (aligned) (cropped)	Lines 31	Lines	39	15:38:04.097 on 05/17/2014	22800	Line	6.85	90	90	-20.56	83.59	76.78	44	86.89	76.78	38	0		6.84763	-61.1892	61.1892
34	1403 (aligned) (cropped)	Lines 32	Lines	39	15:38:04.097 on 05/17/2014	22800	Line	9.99	90	90	-23.2	113.52	83.8	46	117.85	83.8	37	0		9.98744	-64.3073	64.3073
35	1403 (aligned) (cropped)	Lines 33	Lines	39	15:38:04.097 on 05/17/2014	22800	Line	11.8	90	90	-8.65	79.26	101.96	40	88.75	101.96	33	0		11.7924	-36.4132	36.4132
36	1403 (aligned) (cropped)	Lines 34	Lines	74	21:28:04.097 on 05/17/2014	43800	Line	8.42	74.5	288.43	32.31	91.64	62.75	33	89.16	61.92	41	0		8.41661	71.8974	71.8974
37	1403 (aligned) (cropped)	Lines 35	Lines	74	21:28:04.097 on 05/17/2014	43800	Line	9.82	154.52	176.99	25.32	127.35	82.35	36	127.56	86.28	45	0		9.82288	66.3807	66.3807
38	1403 (aligned) (cropped)	Lines 36	Lines	74	21:28:04.097 on 05/17/2014	43800	Line	8.81	148.87	152.45	-15.1	86.89	78.23	42	89.37	82.97	35	0		8.81011	-52.612	52.612
39	1403 (aligned) (cropped)	Lines 37	Lines	86	23:28:04.097 on 05/17/2014	51000	Line	8.14	64.23	64.13	4.68	146.54	77.81	37	153.36	74.51	40	0		8.14877	21.6018	21.6018
40	1403 (aligned) (cropped)	Lines 38	Lines	86	23:28:04.097 on 05/17/2014	51000	Line	9.99	90	90	-23.2	170.28	100.31	48	174.61	100.31	39	0		9.98744	-64.3073	64.3073
41	1403 (aligned) (cropped)	Lines 39	Lines	86	23:28:04.097 on 05/17/2014	51000	Line	9.45	136.46	149.74	-32.94	208.05	106.3	51	209.5	108.77	42	0		9.44476	-72.3469	72.3469
42	1403 (aligned) (cropped)	Lines 40	Lines	86	23:28:04.097 on 05/17/2014	51000	Line	7.19	90	90	11.31	148.2	85.66	39	153.36	85.66	44	0		7.1851	44.0978	44.0978
43	1403 (aligned) (cropped)	Lines 41	Lines	63	19:38:04.097 on 05/17/2014	37200	Line	8.1	60.81	60.8	-1.47	163.06	78.23	44	170.07	74.3	43	0		8.09846	-7.093	7.093
44	1403 (aligned) (cropped)	Lines 42	Lines	63	19:38:04.097 on 05/17/2014	37200	Line	9.72	152.77	152.88	2.49	25.8	128.38	38	30.13	136.84	40	0		9.71187	11.8841	11.8841
45	1403 (aligned) (cropped)	Lines 43	Lines	63	19:38:04.097 on 05/17/2014	37200	Line	10.4	170.06	171.35	-4.91	41.9	149.02	41	43.34	158.52	37	0		10.4079	-22.6018	22.6018
46	1403 (aligned) (cropped)	Lines 44	Lines	63	19:38:04.097 on 05/17/2014	37200	Line	7.01	103.63	103.63	0	50.36	164.29	32	57.17	165.95	32	0		7.0094	0	0
47	1403 (aligned) (cropped)	Lines 45	Lines	25	13:18:04.097 on 05/17/2014	14400	Line	5.66	90	90	-2.12	26.83	149.02	41	32.4	149.02	40	0		5.65905	-10.1781	10.1781
48	1403 (aligned) (cropped)	Lines 46	Lines	25	13:18:04.097 on 05/17/2014	14400	Line	8.55	25.98	25.94	-1.39	121.36	147.37	29	125.08	139.73	28	0		8.55617	-6.71177	6.71177
49	1403 (aligned) (cropped)	Lines 47	Lines	25	13:18:04.097 on 05/17/2014	14400	Line	7.07	90	90	-5.53	201.65	152.12	45	208.05	152.12	42	0		7.06824	-25.1148	25.1148
50	1403 (aligned) (cropped)	Lines 48	Lines	25	13:18:04.097 on 05/17/2014	14400	Line	8.11	14.74	14.74	0	174.2	160.37	35	176.27	152.53	35	0		8.10867	0	0
51	1403 (aligned) (cropped)	Lines 49	Lines	25	13:18:04.097 on 05/17/2014	14400	Line	7.01	90	90	74.05	149.43	126.73	35	149.85	126.73	42	0		7.01259	86.5664	86.5664
52	1403 (aligned) (cropped)	Lines 50	Lines	41	15:58:04.097 on 05/17/2014	24000	Line	7.8	136.06	136.08	-1.53	148.4	134.57	35	153.77	140.15	34	0		7.80854	-7.35779	7.35779
53	1403 (aligned) (cropped)	Lines 51	Lines	41	15:58:04.097 on 05/17/2014	24000	Line	8.57	104.03	104.04	1.39	198.35	120.54	40	206.61	122.6	41	0		8.57153	6.69968	6.69968
54	1403 (aligned) (cropped)	Lines 52	Lines	41	15:58:04.097 on 05/17/2014	24000	Line	5.78	90	90	0	58.82	208.67	40	64.6	208.67	40	0		5.78	0	0
55	1403 (aligned) (cropped)	Lines 53	Lines	41	15:58:04.097 on 05/17/2014	24000	Line	6.66	29.74	29.74	0	29.72	175.65	36	33.02	169.87	36	0		6.6557	0	0
56	1403 (aligned) (cropped)	Lines 54	Lines	41	15:58:04.097 on 05/17/2014	24000	Line	6.38	146.15	196.7	-29.89	26.42	205.37	47	25.8	207.43	41	0		6.37401	-70.2749	70.2749
57	1403 (aligned) (cropped)	Lines 55	Lines	41	15:58:04.097 on 05/17/2014	24000	Line	8.06	34.7	32.47	-12.96	126.32	180.19	41	129.21	175.65	35	0		8.06001	-48.109	48.109
58	1403 (aligned) (cropped)	Lines 56	Lines	41	15:58:04.097 on 05/17/2014	24000	Line	9.33	32.3	32.28	1.27	76.99	170.9	38	81.94	163.06	39	0		9.32567	6.15571	6.15571
59	1403 (aligned) (cropped)	Lines 57	Lines	41	15:58:04.097 on 05/17/2014	24000	Line	7.44	160.56	160.56	0	92.47	179.36	34	94.94	186.38	34	0		7.44186	0	0
60	1403 (aligned) (cropped)	Lines 58	Lines	41	15:58:04.097 on 05/17/2014	24000	Line	6.74	16.28	16.19	-1.77	117.85	202.07	34	119.71	195.67	33	0		6.73941	-8.53312	8.53312
61	1403 (aligned) (cropped)	Lines 59	Lines	41	15:58:04.097 on 05/17/2014	24000	Line	7.89	128.77	130.1	-13.58	109.6	171.72	43	113.52	175.03	37	0		7.89446	-49.4665	49.4665
62	1403 (aligned) (cropped)	Lines 60	Lines	26	13:28:04.097 on 05/17/2014	15000	Line	5.82	142.26	142.31	-2.06	190.92	166.98	41	194.43	171.52	40	0		5.82509	-9.88499	9.88499
63	1403 (aligned) (cropped)	Lines 61	Lines	26	13:28:04.097 on 05/17/2014	15000	Line	9.48	90	90	-7.31	200	164.91	50	208.05	164.91	45	0		9.47642	-31.8452	31.8452
64	1403 (aligned) (cropped)	Lines 62	Lines	26	13:28:04.097 on 05/17/2014	15000	Line	9.31	119.06	119.54	9.87	171.93	183.28	41	178.12	186.79	47	0		9.30786	40.1369	40.1369
Item	Source	Length xyz	Length xy	Height	ND.T	ND.Z	ND.M	Comment		sin theta	angle_radians	angle_degrees
1	Movie1_Position1	11.28	2.48	11	0	0	0			0.975177	1.34752	77.2072
2	Movie1_Position1	8.84	5.4	7	0	0	0			0.791855	0.913841	52.3592
3	Movie1_Position1	9.13	7.64	5	0	0	0			0.547645	0.579547	33.2056
4	Movie1_Position1	9.11	8.18	4	0	0	0			0.439078	0.454572	26.0451
5	Movie1_Position1	8.94	8	4	0	0	0			0.447427	0.463887	26.5787
6	Movie1_Position1	9.19	6.96	6	0	0	0			0.652884	0.711385	40.7594
7	Movie1_Position1	8.81	8.75	1	0	0	0			0.113507	0.113753	6.51754
8	Movie1_Position1	8.09	8.03	1	0	0	0			0.123609	0.123926	7.10046
9	Movie1_Position1	9.12	8.61	3	0	0	0			0.328947	0.335189	19.2049
10	Movie1_Position1	10.1	9.27	4	0	0	0			0.39604	0.4072	23.3308
11	Movie1_Position1	9.08	8.85	2	0	0	0			0.220264	0.222085	12.7246
12	Movie1_Position1	10.26	8.32	6	0	0	0			0.584795	0.624628	35.7885
13	Movie1_Position1	10.46	7.77	7	0	0	0			0.669216	0.733153	42.0066
14	Movie1_Position1	7.47	7.19	2	0	0	0			0.267738	0.271044	15.5297
15	Movie1_Position1	10.31	7.57	7	0	0	0			0.678952	0.746335	42.7618
16	Movie1_Position1	9.74	9.26	3	0	0	0			0.308008	0.313099	17.9392
17	Movie1_Position1	9.17	5.93	7	0	0	0			0.763359	0.868497	49.7612
18	Movie1_Position1	10.92	6.18	9	0	0	0			0.824176	0.968745	55.505
19	Movie1_Position1	9.5	6.43	7	0	0	0			0.736842	0.828387	47.4631
20	Movie1_Position1	10.8	8.22	7	0	0	0			0.648148	0.70515	40.4021
21	Movie1_Position1	11.89	7.78	9	0	0	0			0.756939	0.858616	49.1951
22	Movie1_Position1	8.28	5.71	6	0	0	0			0.724638	0.810508	46.4387
23	Movie1_Position1	8.84	7.88	4	0	0	0			0.452489	0.469554	26.9035
24	Movie1_Position1	7.81	7.22	3	0	0	0			0.384123	0.394258	22.5893
25	Movie1_Position1	9.32	7.13	6	0	0	0			0.643777	0.699424	40.074
26	Movie1_Position1	10.22	9.4	4	0	0	0			0.391389	0.402141	23.041
27	Movie1_Position1	8.68	8.14	3	0	0	0			0.345622	0.352902	20.2198
28	Movie1_Position1	8.22	8.16	1	0	0	0			0.121655	0.121957	6.9876
29	Movie1_Position1	10.02	9.56	3	0	0	0			0.299401	0.304065	17.4216
30	Movie1_Position1	7.23	7.16	1	0	0	0			0.138313	0.138757	7.95021
31	Movie1_Position1	10.41	8.5	6	0	0	0			0.576369	0.614278	35.1956
32	Movie1_Position1	8.68	5.14	7	0	0	0			0.806452	0.938126	53.7507
33	Movie1_Position1	8.42	8.36	1	0	0	0			0.118765	0.119046	6.82082
34	Movie1_Position1	10.09	7.26	7	0	0	0			0.693756	0.766691	43.9282
35	Movie1_Position1	9.06	8.13	4	0	0	0			0.441501	0.457271	26.1997
36	Movie1_Position1	9.33	7.88	5	0	0	0			0.535906	0.56558	32.4054
37	Movie1_Position1	7.59	2.94	7	0	0	0			0.922266	1.1739	67.2597
38	Movie1_Position1	7.19	1.62	7	0	0	0			0.973574	1.34039	76.7989
39	Movie1_Position1	8.98	5.63	7	0	0	0			0.77951	0.893883	51.2157
40	Movie1_Position1	8.85	5.41	7	0	0	0			0.79096	0.912377	52.2754
41	Movie1_Position1	7.47	6.31	4	0	0	0			0.535475	0.56507	32.3761
42	Movie1_Position1	9.36	8.87	3	0	0	0			0.320513	0.326271	18.6939
43	Movie1_Position1	8.58	7.59	4	0	0	0			0.4662	0.484991	27.7879
44	Movie1_Position1	9.43	6.32	7	0	0	0			0.742312	0.836514	47.9287
45	Movie1_Position1	8.71	8.65	1	0	0	0			0.114811	0.115064	6.5927
46	Movie1_Position1	8.37	7.82	3	0	0	0			0.358423	0.366578	21.0034
47	Movie1_Position1	7.59	4.65	6	0	0	0			0.790514	0.911648	52.2336
48	Movie1_Position1	9.49	8.07	5	0	0	0			0.52687	0.554914	31.7942
49	Movie1_Position1	9.36	9.15	2	0	0	0			0.213675	0.215336	12.3378
50	Movie1_Position1	5.46	2.19	5	0	0	0			0.915751	1.15737	66.3126
51	Movie1_Position1	9.75	3.75	9	0	0	0			0.923077	1.17601	67.3801
52	Movie1_Position1	6.28	1.84	6	0	0	0			0.955414	1.27106	72.8263
53	Movie1_Position1	10.76	7.19	8	0	0	0			0.743494	0.838281	48.0299
54	Movie1_Position1	10.42	9.98	3	0	0	0			0.287908	0.292041	16.7327
1	Movie1Position2	7.72	7.46	2	0	0	0			0.259067	0.262056	15.0147
2	Movie1Position2	11.04	9.26	6	0	0	0			0.543478	0.574575	32.9207
3	Movie1Position2	9.7	9.65	1	0	0	0			0.103093	0.103276	5.91729
4	Movie1Position2	9.39	8.9	3	0	0	0			0.319489	0.32519	18.632
5	Movie1Position2	8.65	3.29	8	0	0	0			0.924855	1.18066	67.6466
6	Movie1Position2	11.36	6.93	9	0	0	0			0.792254	0.914493	52.3966
7	Movie1Position2	8.22	7.97	2	0	0	0			0.243309	0.245776	14.0819
8	Movie1Position2	11.48	5.63	10	0	0	0			0.87108	1.0574	60.5844
9	Movie1Position2	8.05	5.37	6	0	0	0			0.745342	0.841047	48.1884
10	Movie1Position2	7.64	4.72	6	0	0	0			0.78534	0.903246	51.7522
11	Movie1Position2	9.66	8.79	4	0	0	0			0.414079	0.42693	24.4613
12	Movie1Position2	9.68	9.63	1	0	0	0			0.103306	0.10349	5.92956
13	Movie1Position2	8.55	7.56	4	0	0	0			0.467836	0.486841	27.8939
14	Movie1Position2	9.51	9.45	1	0	0	0			0.105152	0.105347	6.03595
15	Movie1Position2	9.23	8.73	3	0	0	0			0.325027	0.33104	18.9672
16	Movie1Position2	6.76	6.76	0	0	0	0			0	0	0
17	Movie1Position2	7.54	7.48	1	0	0	0			0.132626	0.133018	7.62136
18	Movie1Position2	8.52	8.52	0	0	0	0			0	0	0
19	Movie1Position2	9.65	9.6	1	0	0	0			0.103627	0.103813	5.94806
20	Movie1Position2	9.4	8.51	4	0	0	0			0.425532	0.43955	25.1843
21	Movie1Position2	8.2	8.14	1	0	0	0			0.121951	0.122256	7.00473
22	Movie1Position2	9.01	6.73	6	0	0	0			0.665927	0.728735	41.7535
23	Movie1Position2	7.68	7.61	1	0	0	0			0.130208	0.130579	7.48163
24	Movie1Position2	10.28	9.47	4	0	0	0			0.389105	0.39966	22.8988
25	Movie1Position2	7.95	7.36	3	0	0	0			0.377358	0.386942	22.1702
26	Movie1Position2	9.81	7.76	6	0	0	0			0.611621	0.658108	37.7068
27	Movie1Position2	7.11	3.81	6	0	0	0			0.843882	1.00448	57.5523
28	Movie1Position2	7.06	5.82	4	0	0	0			0.566572	0.60234	34.5115
29	Movie1Position2	8.7	3.41	8	0	0	0			0.91954	1.16691	66.859
30	Movie1Position2	11.26	10.09	5	0	0	0			0.44405	0.460113	26.3626
31	Movie1Position2	7.8	7.8	0	0	0	0			0	0	0
32	Movie1Position2	7.02	4.93	5	0	0	0			0.712251	0.792699	45.4183
33	Movie1Position2	9.12	7.63	5	0	0	0			0.548246	0.580265	33.2467
34	Movie1Position2	9.56	8.14	5	0	0	0			0.523013	0.550382	31.5345
35	Movie1Position2	9.72	7.65	6	0	0	0			0.617284	0.665286	38.1181
36	Movie1Position2	8.04	7.98	1	0	0	0			0.124378	0.124701	7.14484
37	Movie1Position2	9.97	9.14	4	0	0	0			0.401204	0.41283	23.6534
38	Movie1Position2	5.56	2.44	5	0	0	0			0.899281	1.11812	64.0637
39	Movie1Position2	8.54	6.07	6	0	0	0			0.702576	0.779011	44.6341
40	Movie1Position2	9.3	8.4	4	0	0	0			0.430108	0.444612	25.4744
41	Movie1Position2	9.82	7.77	6	0	0	0			0.610998	0.657321	37.6617
42	Movie1Position2	8.85	8.79	1	0	0	0			0.112994	0.113236	6.48796
43	Movie1Position2	9.24	9.24	0	0	0	0			0	0	0
1	Movie1_Position3	8.24	8	2	0	0	0			0.242718	0.245167	14.047
2	Movie1_Position3	8.68	5.14	7	0	0	0			0.806452	0.938126	53.7507
3	Movie1_Position3	9.49	3	9	0	0	0			0.948367	1.24805	71.5078
4	Movie1_Position3	9.48	9.43	1	0	0	0			0.105485	0.105682	6.05512
5	Movie1_Position3	6.88	6.19	3	0	0	0			0.436047	0.451201	25.8519
6	Movie1_Position3	8.65	5.08	7	0	0	0			0.809249	0.942872	54.0226
7	Movie1_Position3	9.37	9.15	2	0	0	0			0.213447	0.215102	12.3244
8	Movie1_Position3	7.55	7.48	1	0	0	0			0.13245	0.132841	7.61121
9	Movie1_Position3	8.09	7.03	4	0	0	0			0.494438	0.517188	29.6327
10	Movie1_Position3	6.1	1.09	6	0	0	0			0.983607	1.38948	79.6111
11	Movie1_Position3	8.31	6.64	5	0	0	0			0.601685	0.645609	36.9907
12	Movie1_Position3	8.51	6.89	5	0	0	0			0.587544	0.62802	35.9829
13	Movie1_Position3	7.68	3.16	7	0	0	0			0.911458	1.14682	65.7077
14	Movie1_Position3	9.22	7	6	0	0	0			0.650759	0.708584	40.5989
15	Movie1_Position3	9.74	5.55	8	0	0	0			0.821355	0.963783	55.2207
16	Movie1_Position3	9.03	8.81	2	0	0	0			0.221484	0.223336	12.7962
17	Movie1_Position3	8.41	7.4	4	0	0	0			0.475624	0.495674	28.4
18	Movie1_Position3	10.14	1.66	10	0	0	0			0.986193	1.40443	80.468
19	Movie1_Position3	8.37	7.36	4	0	0	0			0.477897	0.498259	28.5482
20	Movie1_Position3	9.09	8.58	3	0	0	0			0.330033	0.336339	19.2708
21	Movie1_Position3	8.68	7.7	4	0	0	0			0.460829	0.47893	27.4406
22	Movie1_Position3	7.67	7.67	0	0	0	0			0	0	0
23	Movie1_Position3	8.76	3.57	8	0	0	0			0.913242	1.15117	65.9573
24	Movie1_Position3	8.86	5.43	7	0	0	0			0.790068	0.910919	52.1918
25	Movie1_Position3	8.53	4.87	7	0	0	0			0.820633	0.962518	55.1482
26	Movie1_Position3	8.55	4.91	7	0	0	0			0.818713	0.959167	54.9562
27	Movie1_Position3	10.11	4.6	9	0	0	0			0.890208	1.0978	62.8994
28	Movie1_Position3	8.2	1.79	8	0	0	0			0.97561	1.34948	77.3196
29	Movie1_Position3	8.42	8.36	1	0	0	0			0.118765	0.119046	6.82082
30	Movie1_Position3	8.75	7.78	4	0	0	0			0.457143	0.47478	27.2029
31	Movie1_Position3	8.89	8.37	3	0	0	0			0.337458	0.344215	19.7221
32	Movie1_Position3	8.77	6.4	6	0	0	0			0.684151	0.753438	43.1688
33	Movie1_Position3	6.43	6.36	1	0	0	0			0.155521	0.156155	8.94701
34	Movie1_Position3	7.2	3.98	6	0	0	0			0.833333	0.985111	56.4427
35	Movie1_Position3	5.5	5.5	0	0	0	0			0	0	0
36	Movie1_Position3	8.2	5.6	6	0	0	0			0.731707	0.820823	47.0297
37	Movie1_Position3	8.49	4.8	7	0	0	0			0.824499	0.969317	55.5378
38	Movie1_Position3	8.23	5.63	6	0	0	0			0.72904	0.816919	46.806
39	Movie1_Position3	6.62	2.81	6	0	0	0			0.906344	1.13455	65.005
40	Movie1_Position3	7.93	5.18	6	0	0	0			0.75662	0.858129	49.1672
41	Movie1_Position3	7.56	7.49	1	0	0	0			0.132275	0.132664	7.60108
42	Movie1_Position3	6.56	5.2	4	0	0	0			0.609756	0.655753	37.5719
43	Movie1_Position3	9.36	9.3	1	0	0	0			0.106838	0.107042	6.13305
44	Movie1_Position3	8.41	2.61	8	0	0	0			0.951249	1.25726	72.0356
45	Movie1_Position3	8.08	7.02	4	0	0	0			0.49505	0.517892	29.673
46	Movie1_Position3	9.17	1.75	9	0	0	0			0.981461	1.37794	78.9503
47	Movie1_Position3	6.32	4.9	4	0	0	0			0.632911	0.685308	39.2652
48	Movie1_Position3	6.75	3.08	6	0	0	0			0.888889	1.09491	62.734
49	Movie1_Position3	7.94	7.88	1	0	0	0			0.125945	0.12628	7.23531
50	Movie1_Position3	10.72	3.86	10	0	0	0			0.932836	1.20221	68.8813
51	Movie1_Position3	8.36	8.11	2	0	0	0			0.239234	0.241577	13.8414
52	Movie1_Position3	8.5	6.87	5	0	0	0			0.588235	0.628875	36.0319
53	Movie1_Position3	9.37	9.37	0	0	0	0			0	0	0
54	Movie1_Position3	7.01	4.91	5	0	0	0			0.713267	0.794148	45.5013
55	Movie1_Position3	8.08	7.02	4	0	0	0			0.49505	0.517892	29.673
56	Movie1_Position3	8.51	6.03	6	0	0	0			0.705053	0.782498	44.8338
57	Movie1_Position3	9.09	1.27	9	0	0	0			0.990099	1.42996	81.9307
58	Movie1_Position3	7.59	6.44	4	0	0	0			0.527009	0.555078	31.8036
59	Movie1_Position3	7.96	6.19	5	0	0	0			0.628141	0.679161	38.9131
