# Supplementary material for: Epithelial geometry regulates spindle orientation and progenitor fate during formation of the mammalian epidermis
Source: eLife journal article supplement (doi:10.7554/elife.47102), 2019-06-12
Supplement: supp [file PolarityVectors.xlsx]

## Sheet: ControlPolarity
22	49.1757	699.166	126.315	-45.78	1.87784	-0.680577		0.63287	178.937
23	89.5836	1019.6	120.286	-46.0934	1.78821	-0.685236
24	62.5229	877.456	51.859	-31.7695	0.77095	-0.472294
25	71.1445	549.407	63	75.5451	0.936574	1.12307
26	68.0818	1577.35	18.56	-60.7147	0.275917	-0.9026
28	78.9491	1686.68	178.439	15.9893	2.65272	0.237701
29	73.5571	191.045	24.2621	-31.0477	0.360687	-0.461564
30	120.548	412.857	-132.79	39.6771	-1.97409	0.589849
31	100.031	270.152	60.0082	-24.4697	0.892097	-0.363773
32	94.8209	1412.43	9.662	67.3376	0.143638	1.00106
33	92.7605	352.718	-97.0827	151.924	-1.44326	2.25855
34	105.631	1630.82	51.0277	9.57742	0.758591	0.14238
36	126.107	678.288	96.6299	2.31278	1.43652	0.0343823
37	122.958	1145.41	61.4158	51.9762	0.913024	0.772692
38	147.348	1481.52	14.6629	114.079	0.217982	1.69593
40	136.325	177.254	131.384	-12.0984	1.95318	-0.179857
41	146.3	92.8896	46.9445	-31.5311	0.697888	-0.468749
42	125.54	846.748	74.0384	3.04717	1.10067	0.0453
44	181.652	1187.94	-18.4995	103.337	-0.275019	1.53623
45	186.639	1002.18	132.236	-27.8209	1.96586	-0.413593
46	179.802	591.453	164.951	18.4735	2.4522	0.274632
47	167.162	317.889	86.593	-41.236	1.28731	-0.613025
48	184.307	1347.11	153.404	17.8645	2.28055	0.265578
49	157.509	481.526	-2.37492	-100.88	-0.0353061	-1.49971
50	170.009	1635.78	-48.0602	31.4122	-0.714476	0.466982
51	182.766	851.745	172.186	124.708	2.55976	1.85394
53	231.667	278.487	96.0429	-98.2305	1.4278	-1.46032
55	213.423	1553.68	70.8408	92.2604	1.05314	1.37157
56	218.163	438.498	105.431	-61.4072	1.56737	-0.912896
57	218.345	165.544	188.197	-78.1682	2.79778	-1.16207
58	215.569	735.764	100.266	-17.6596	1.49058	-0.262532
59	246.161	1240.14	69.7153	99.3028	1.03641	1.47626
60	261.754	88.3175	-73.4173	-23.7677	-1.09144	-0.353336
61	249.823	887.012	-10.5532	115.059	-0.156887	1.71049
62	264.129	561.857	51.8164	-52.4851	0.770316	-0.780257
63	270.596	1506.31	-7.80568	61.6551	-0.116041	0.91658
64	268.328	1377.23	34.8938	66.4772	0.51874	0.988268
65	287.015	1656.99	60.2236	63.8644	0.8953	0.949424
66	275.184	1005.6	136.774	-52.6583	2.03332	-0.782831
67	291.592	1103.07	81.3362	66.5769	1.20916	0.989749
68	290.05	413.693	83.1216	24.5392	1.23571	0.364806
69	278.622	720.105	94.4503	73.127	1.40412	1.08712
71	310.642	185.334	60.8439	-52.5504	0.904521	-0.781228
72	322.519	1454.72	2.48889	38.2331	0.0370005	0.568384
74	338.602	1576.07	-17.5094	-59.6824	-0.2603	-0.887254
75	324.6	1190.76	8.77729	44.9242	0.130486	0.667854
76	334.644	343.397	73.0835	178.261	1.08648	2.65008
77	343.15	900.759	48.907	-36.0752	0.727064	-0.536303
78	344.64	1297.54	-6.0416	19.1226	-0.089816	0.284281
79	333.964	588.756	15.9012	-66.8883	0.236391	-0.994378
80	352.982	105.05	17.9883	22.3569	0.267419	0.332363
81	328.745	483.368	60.4186	-22.7624	0.898198	-0.338392
82	348.509	719.156	160.204	-107.087	2.38163	-1.59199
83	366.008	1392.96	138.213	-33.2972	2.05471	-0.495005
84	361.314	244.919	-23.0091	-30.5489	-0.342059	-0.454148
85	352.921	1011.01	81.7739	15.4526	1.21567	0.229722
86	361.704	1497.47	-12.9202	-20.2725	-0.192075	-0.301377
87	399.424	563.408	-38.2993	85.726	-0.569367	1.27442
88	386.459	1660.32	101.284	28.7305	1.50571	0.427115
89	396.507	840.955	49.6963	-30.8613	0.738797	-0.458791
90	397.933	1092.57	140.3	-76.957	2.08574	-1.14406
93	413.695	1215.1	177.14	-33.758	2.6334	-0.501855
94	420.889	392.843	168.911	105.93	2.51108	1.57479
95	423.721	1500.81	-10.4506	-38.5505	-0.155361	-0.573102
96	423.056	751.955	-61.102	133.953	-0.908359	1.99137
97	424.306	242.461	-10.9046	-1.7577	-0.16211	-0.0261304
98	463.287	1012.63	57.855	-5.17372	0.860087	-0.0769138
99	463.079	85.3213	27.4312	-40.2759	0.407799	-0.598751
100	438.523	1332.47	-32.6124	8.13252	-0.484824	0.1209
101	464.517	930.404	93.9819	2.37405	1.39716	0.0352933
102	479.117	177.582	93.8518	-61.7299	1.39522	-0.917692
103	458.572	539.829	-42.3123	-47.4821	-0.629026	-0.705881
104	469.171	1558.86	68.2567	48.4287	1.01472	0.719953
107	473.625	690.864	-33.4064	132.244	-0.496628	1.96597
108	479.662	834.682	69.7842	83.6187	1.03743	1.2431
109	490.085	1104.63	41.5072	25.0868	0.617056	0.372947
111	480.932	310.643	98.8699	9.55064	1.46983	0.141982
112	513.818	513.548	-35.0839	7.73374	-0.521566	0.114972
113	512.893	1607.86	33.9573	69.6757	0.504818	1.03582
114	526.38	1173.03	23.894	24.975	0.355215	0.371285
115	499.774	1389.39	157.719	-16.7639	2.3447	-0.249217
116	507.779	1287.05	30.3428	-11.7209	0.451084	-0.174246
117	511.437	411.396	97.8221	-72.5645	1.45425	-1.07876
118	524.01	641.872	-56.9763	-42.0029	-0.847024	-0.624426
119	536.303	1458.22	-19.2519	-9.63063	-0.286204	-0.143171
120	549.818	734.935	98.9096	-34.5209	1.47042	-0.513197
122	547.795	1000.36	-35.6469	68.7017	-0.529935	1.02134
123	543.54	317.404	69.3457	68.7949	1.03091	1.02272
124	549.27	861.816	75.9427	-95.3833	1.12898	-1.41799
125	540.03	1549.93	18.2272	49.5247	0.27097	0.736247
126	553.516	180.629	52.8366	94.5313	0.785483	1.40533
128	602.755	951.853	40.5914	-13.0361	0.603442	-0.193798
129	562.73	589.29	54.0843	-63.3337	0.804032	-0.941535
130	612.017	125.987	46.1346	90.4169	0.685849	1.34416
131	579.429	480.698	74.1306	5.95942	1.10204	0.0885942
132	584.131	1355.73	39.3739	6.42925	0.585343	0.0955788
133	592.911	1497.12	-18.2455	-35.0139	-0.271242	-0.520526
134	604.682	1260.54	56.7887	36.3153	0.844236	0.539872
135	609.852	1178.27	56.8369	9.20488	0.844952	0.136842
136	599.353	639.86	-23.434	-17.5087	-0.348376	-0.260288
137	608.11	1063.51	163.233	109.969	2.42666	1.63483
138	607.341	355.526	22.7401	16.9681	0.33806	0.252252
139	639.361	784.53	70.5426	-34.3844	1.0487	-0.511167
140	616.192	1579.31	119.539	80.7653	1.77709	1.20068
141	630.84	566.41	-35.6528	34.4938	-0.530024	0.512794
142	654.463	870.928	61.0405	-79.9238	0.907443	-1.18817
144	637.299	275.81	69.8965	-57.4918	1.0391	-0.854688
147	653.22	700.16	152.298	-150.873	2.2641	-2.24292
148	681.31	211.517	-35.4654	18.5263	-0.527237	0.275416
149	662.115	1411.52	13.0407	-75.6023	0.193866	-1.12392
150	670.987	1489.98	32.4472	36.0072	0.482369	0.535292
151	664.106	1315	59.7132	-16.4338	0.887712	-0.24431
152	659.835	98.0829	-23.1893	27.4788	-0.344739	0.408507
153	695.506	414.61	70.6052	24.5708	1.04964	0.365276
154	680.958	1084.46	4.52602	115.115	0.067285	1.71133
155	694.385	523.495	104.579	-41.193	1.55469	-0.612386
156	692.527	971.288	136.367	148.538	2.02726	2.2082
157	687.596	1574.7	78.0057	-123.739	1.15965	-1.83953
158	707.898	1216.88	-27.6069	25.0188	-0.410411	0.371935
159	709.795	1145.51	13.2385	85.1795	0.196807	1.2663
160	722.888	606.205	169.746	14.3072	2.52349	0.212695
161	712.943	306.592	110.997	-11.6777	1.65011	-0.173604
163	726.009	83.3262	53.6747	30.7508	0.797942	0.457149
164	742.712	1280.94	64.025	-8.33943	0.951812	-0.123976
165	735.733	710.879	-6.29868	23.4635	-0.0936378	0.348815
166	746.349	158.821	49.003	-1.06285	0.728491	-0.0158007
167	738.16	839.274	50.5058	-35.1499	0.750832	-0.522547
168	745.966	1392.92	-75.8702	-36.6073	-1.12791	-0.544213
169	763.453	448.745	-39.5898	-76.804	-0.588552	-1.14179
170	744.039	1561.59	13.6511	80.9199	0.202941	1.20298
172	757.542	1018.3	165.591	46.6252	2.46172	0.693142
174	788.863	231.803	39.7104	24.3701	0.590345	0.362292
175	808.478	1507.62	24.7741	141.045	0.368298	2.09682
176	772.192	1150.55	-40.298	1.33896	-0.599081	0.0199053
177	812.555	747.371	196.473	-44.0943	2.92082	-0.655517
178	811.614	1629	76.3991	-90.3327	1.13577	-1.34291
179	823.709	928.667	38.3955	-7.4489	0.570797	-0.110737
181	794.543	324.403	44.6644	-18.6353	0.663993	-0.277037
182	810.845	626.023	137.86	-26.6865	2.04946	-0.396728
183	818.378	1309.73	102.436	-17.1488	1.52284	-0.254938
184	814.331	1416.85	-0.761545	-4.931	-0.0113213	-0.0733055
185	824.512	509.759	42.4179	-60.7903	0.630595	-0.903724
186	821.812	841.378	105.91	-38.1402	1.57449	-0.567002
187	851.377	1028.13	132	28.5095	1.96234	0.42383
188	848.905	1145.06	105.582	-5.72181	1.5696	-0.0850619
189	850.259	1229.08	30.6808	149.112	0.456109	2.21674
190	864.071	377.296	129.356	-53.7662	1.92304	-0.799302
192	850.46	106.143	98.2443	45.2735	1.46053	0.673048
194	874.283	296.341	74.2135	104.549	1.10328	1.55425
196	864.804	440.081	-49.7707	-48.7261	-0.739904	-0.724375
197	889.325	148.151	78.6138	-34.4614	1.16869	-0.512311
198	898.384	223.806	80.6979	-62.3025	1.19968	-0.926205
199	892.697	730.759	174.945	-2.03445	2.60077	-0.0302446
200	913.242	1590.15	139.558	0.228981	2.0747	0.00340409
202	895.746	601.819	64.6492	-49.7556	0.961092	-0.73968
203	915.139	1307.99	171.663	181.943	2.55199	2.7048
204	903.838	1500.63	16.4984	-81.1658	0.24527	-1.20663
205	901.253	845.508	75.3091	18.3197	1.11957	0.272345
206	905.427	1410.94	41.9478	-14.7902	0.623607	-0.219874
207	943.909	514.541	-68.9734	-40.61	-1.02538	-0.603718
208	953.934	1670.84	-19.2475	21.8567	-0.286138	0.324927
209	940.243	1044.06	82.6005	-69.4645	1.22796	-1.03268
211	961.641	419.726	1.66454	53.4034	0.0247455	0.793909
212	951.259	945.516	35.5848	30.3679	0.529013	0.451457
213	965.035	650.442	-92.5216	16.6356	-1.37545	0.247309
214	966.942	1197.3	53.5272	97.7892	0.79575	1.45376
215	973.998	315.272	162.806	-68.4329	2.42032	-1.01734
216	957.469	116.082	-12.7609	-70.6548	-0.189706	-1.05037
217	978.08	864.56	-25.4719	-21.6057	-0.378671	-0.321195
218	968.591	759.608	4.0006	39.1695	0.059474	0.582305
219	1001.76	160.127	76.1112	-68.3374	1.13149	-1.01592
220	980.577	1418.45	-62.134	60.192	-0.9237	0.894829
222	975.826	1107.18	-16.2567	-15.697	-0.241677	-0.233356
223	1009.02	223.105	65.0789	-115.736	0.967479	-1.72056
225	1028.96	567.251	-42.3599	9.25427	-0.629733	0.137576
226	1031.81	708.465	135.304	75.6333	2.01146	1.12438
227	1035.03	1593.7	-38.3729	39.771	-0.570462	0.591246
228	1044.06	1336.88	85.4616	53.2445	1.27049	0.791546
229	1021.31	987.508	30.6178	-5.58826	0.455173	-0.0830765
230	1053.28	1466.45	48.8092	-165.105	0.725611	-2.45449
231	1050.47	1111.16	63.8525	41.1513	0.949247	0.611766
232	1024.8	446.5	-43.9576	-35.3145	-0.653484	-0.524995
234	1022.72	1208.5	21.6561	38.7389	0.321945	0.575903
235	1060.14	887.627	-15.7947	12.4577	-0.234808	0.185199
236	1044.2	795.878	1.35083	-48.7696	0.0200818	-0.725022
237	1046.59	643.144	-22.5464	-15.6374	-0.33518	-0.23247
238	1046.4	306.553	9.97895	-72.0691	0.14835	-1.0714
239	1092.01	1220.29	39.4519	-75.4623	0.586502	-1.12184
240	1121.9	957.269	109.899	46.9788	1.63378	0.698398
241	1112.43	146.892	110.851	-118.77	1.64795	-1.76566
242	1076.67	440.794	-23.387	6.56445	-0.347677	0.0975887
243	1103.56	535.548	-51.9835	13.8457	-0.7728	0.205833
244	1076.49	1036.85	4.46762	7.45264	0.0664168	0.110793
246	1111.7	657.852	-21.6747	5.38275	-0.322221	0.0800213
247	1107.33	278.799	87.0533	115.307	1.29416	1.71419
248	1125.74	1528.38	93.8275	-28.5415	1.39486	-0.424306
249	1121.44	754.658	53.0049	95.7997	0.787985	1.42418
250	1092.46	1300.54	-61.4375	-52.9701	-0.913346	-0.787467
251	1132.8	1632.59	78.9067	-2.88564	1.17305	-0.0428987
253	1129.09	1074.9	78.1109	-32.2872	1.16122	-0.479989
254	1096.65	36.8958	99.5953	-48.1298	1.48061	-0.715509
255	1122.02	408.876	-62.0529	34.4122	-0.922495	0.51158
256	1129.96	852.122	15.0902	-29.9616	0.224334	-0.445417
257	1139.16	1338.18	-14.8068	-22.7	-0.220121	-0.337464
258	1170.65	52.1635	41.0987	93.455	0.610984	1.38933
259	1171.44	604.499	154.835	25.1802	2.30181	0.374335
261	1182.8	1187.7	54.9465	-18.5801	0.816848	-0.276217
262	1183.07	320.817	152.748	-47.8152	2.2708	-0.710834
263	1176.44	521.807	13.4831	-25.7759	0.200443	-0.383191
264	1192.9	428.245	102.253	-31.6692	1.52012	-0.470802
265	1183.65	1380.48	-14.3838	76.8974	-0.213834	1.14318
266	1202.45	188.78	-3.03385	53.4344	-0.0451019	0.79437
267	1167.83	781.179	-31.9939	-32.6901	-0.475629	-0.485979
268	1204.51	1022.15	39.2896	47.6063	0.58409	0.707728
269	1195.55	1482.39	-53.3528	37.3131	-0.793157	0.554706
270	1202.31	875.026	79.9262	-30.5063	1.1882	-0.453515
271	1195.85	694.191	62.6413	-47.0301	0.931242	-0.699162
273	1250.6	1618.36	64.767	28.2316	0.962843	0.419698
274	1239.44	80.7099	71.4906	-5.27272	1.0628	-0.0783856
275	1254.11	751.49	31.0307	-43.719	0.461311	-0.649938
276	1262.2	1262.6	15.9673	-32.7953	0.237374	-0.487543
277	1246.89	284.46	40.604	1.37841	0.60363	0.0204919
278	1265.73	1110.62	58.1546	-12.5334	0.864541	-0.186324
279	1264.91	1503.03	124.434	-22.4157	1.84987	-0.333237
280	1243.98	510.578	-45.8825	47.3025	-0.682102	0.703211
281	1249.33	659.73	13.6353	-3.90691	0.202706	-0.0580812
282	1264.97	1375.57	35.9586	-98.4872	0.534569	-1.46414
283	1294.62	146.437	-15.1072	16.0162	-0.224588	0.238102
284	1260.07	799.835	72.9601	6.32453	1.08464	0.0940221
285	1311.77	650.98	31.1003	-11.8152	0.462345	-0.175647
287	1281.08	887.652	65.9554	51.0857	0.980509	0.759453
288	1284.5	424.644	-30.5622	30.8938	-0.454345	0.459275
289	1303.86	568.31	-27.0028	-61.2176	-0.401431	-0.910077
290	1318.58	984.612	11.2359	-46.6551	0.167036	-0.693587
291	1312.32	1681.84	20.9576	-48.5446	0.311562	-0.721676
293	1336.8	237.257	31.3633	120.583	0.466255	1.79261
295	1310.87	345.542	22.6631	42.353	0.336916	0.62963
296	1366.24	1306	91.8632	-12.4462	1.36566	-0.185029
297	1350.91	1201.08	97.8114	-45.9927	1.45409	-0.683739
298	1354.71	460.909	-31.0979	54.4227	-0.462309	0.809062
299	1332.67	1489.11	36.5202	-12.4118	0.542918	-0.184517
300	1356.71	1084.48	108.401	-6.36011	1.61152	-0.094551
301	1352.02	807.441	8.16271	98.3383	0.121349	1.46192
302	1375.85	1401.46	28.58	17.3647	0.424877	0.258148
303	1331.58	905.556	85.1291	-95.1091	1.26555	-1.41392
304	1386.66	1519.54	-24.0244	27.4964	-0.357153	0.408768
305	1428.7	1616.51	-15.5287	-12.6688	-0.230854	-0.188338
306	1382.19	312.573	-38.288	92.1099	-0.569199	1.36933
307	1396.54	712.443	-5.94292	-29.9368	-0.088349	-0.445048
308	1406.06	587.295	44.123	-68.2752	0.655943	-1.015
309	1396.84	936.848	21.5583	66.8927	0.320491	0.994444
311	1412.57	501.392	46.9729	2.11626	0.698312	0.0314608
312	1393.53	1671.02	-14.1017	20.5558	-0.20964	0.305588
313	1415.74	171.449	-10.1821	14.443	-0.15137	0.214714
314	1409.21	394.125	-9.62963	59.7954	-0.143157	0.888933
315	1454.9	91.3138	19.2577	-33.1072	0.28629	-0.492181
316	1432.43	818.243	88.6739	-37.8851	1.31825	-0.563209
317	1423.52	1047.67	13.9325	-109.616	0.207124	-1.62957
318	1435.8	1198.3	-10.1625	-45.3956	-0.151078	-0.674862
319	1457.45	637.487	54.4382	-35.091	0.809293	-0.521672
320	1470.89	1457.37	59.6237	21.0933	0.886382	0.313579
321	1454.55	333.18	-21.7936	-26.7309	-0.323989	-0.397388
323	1463.93	892.93	-42.256	-16.0306	-0.628189	-0.238315
324	1477.54	1331.1	104.136	6.71908	1.54812	0.0998876
325	1478.2	257.359	75.4354	11.312	1.12144	0.168168
326	1522.6	1533.43	50.2928	6.85928	0.747665	0.101972
327	1479.2	1000.81	47.5601	-112.439	0.70704	-1.67154
328	1484.2	1157.65	89.2079	35.5907	1.32619	0.5291
329	1476.1	739.14	25.4116	32.383	0.377776	0.481413
330	1490.45	457.877	34.9162	-50.5848	0.519074	-0.752007
331	1497.9	1092.96	-1.93068	18.8462	-0.028702	0.280173
332	1528.09	947.448	12.281	-69.7107	0.182573	-1.03634
333	1501.96	199.888	98.1238	39.1174	1.45873	0.58153
335	1536.64	532.059	73.7952	-71.0195	1.09706	-1.05579
336	1509.5	687.697	-82.7715	-35.5001	-1.2305	-0.527754
337	1528.66	128.485	-53.0262	32.9438	-0.788301	0.48975
338	1524.17	1046.76	-2.04282	-76.1148	-0.0303691	-1.13154
340	1516.87	609.866	27.4955	-21.4271	0.408755	-0.318541
341	1550.33	852.649	84.5913	17.6471	1.25756	0.262346
342	1545.29	766.616	52.5767	-39.8697	0.781618	-0.592713
344	1567.1	1217.87	-15.8325	-57.134	-0.23537	-0.849369
345	1567.74	1339.81	65.7974	-54.3878	0.978161	-0.808543
346	1578.9	616.864	-26.1185	-94.5405	-0.388285	-1.40546
347	1566.41	1108.03	-14.5628	0.356385	-0.216494	0.00529811
348	1570.62	236.735	23.2051	67.4727	0.344973	1.00307
351	1582.38	1062.21	19.8981	4.97399	0.29581	0.0739446
354	1597.56	1024.82	28.7586	34.2374	0.427533	0.508981
20	55.8001	1141.19	122.596	-35.1646	1.62834	-0.467063		0.607724	178.706
21	78.0337	1311.89	73.6701	-66.8116	0.978503	-0.887406
22	30.6504	539.409	-86.403	58.2475	-1.14762	0.773656
23	69.2513	169.728	-49.0725	-79.0614	-0.651792	-1.05011
24	65.7252	879.647	13.7309	147.533	0.182377	1.95956
25	58.5212	276.015	44.7453	39.4121	0.594317	0.52348
26	92.2848	1392.79	40.9638	-75.6607	0.54409	-1.00494
27	69.2663	392.241	-14.4208	18.9885	-0.19154	0.25221
28	51.718	485.482	10.5489	41.2172	0.140112	0.547456
29	53.498	610.96	-26.1944	28.1893	-0.34792	0.374416
30	77.5736	729.217	42.5448	26.6188	0.565089	0.353557
31	95.2707	1476.16	50.2474	76.8716	0.667396	1.02103
32	120.094	941.663	24.6656	96.5399	0.327613	1.28226
33	123.315	97.4537	80.0425	-56.3336	1.06314	-0.748235
35	117.433	505.775	-4.69516	-13.1464	-0.0623621	-0.174614
36	128.383	236.277	-57.5304	-37.6791	-0.764131	-0.500461
37	128.399	592.22	-55.0183	47.303	-0.730765	0.628288
38	125.354	360.948	-76.9578	5.03488	-1.02217	0.0668744
39	119.928	1202.62	-15.1426	5.98277	-0.201127	0.0794644
40	153.166	820.845	-8.92955	64.5392	-0.118604	0.857223
41	146.577	1102.35	64.1389	-100.74	0.851907	-1.33805
43	159.498	739.909	119.123	-6.70918	1.58221	-0.0891128
44	178.844	639.82	106.407	-15.2097	1.41332	-0.202019
45	151.665	1034.29	32.2624	55.5355	0.428516	0.737634
46	165.882	1498.37	42.8055	33.7793	0.568552	0.448664
47	181.338	307.203	111.631	-5.91169	1.48271	-0.0785203
48	178.651	429.029	153.433	-22.5428	2.03792	-0.299418
49	173.595	1184.7	-22.2469	4.05179	-0.295489	0.0538168
50	189.186	1300.34	84.2744	42.1501	1.11935	0.559846
51	177.448	47.5326	11.5607	15.6651	0.153552	0.208067
52	182.509	153.105	-18.8277	-76.6257	-0.250074	-1.01776
53	196.245	202.936	51.4233	-5.82746	0.683015	-0.0774015
54	198.591	1405.3	99.0535	178.133	1.31565	2.366
55	210.365	972.665	107.738	22.9271	1.431	0.304523
56	213.026	858.533	62.7292	-24.9327	0.833183	-0.331161
58	223.434	1229.14	53.6084	-45.5234	0.712038	-0.604651
59	211.173	518.328	-30.3148	-46.2431	-0.402648	-0.61421
61	221.861	1553.63	31.4614	-64.9832	0.417877	-0.863121
62	231.55	105.38	54.6223	-71.1177	0.725505	-0.944601
63	225.507	248.377	-37.8571	-26.2125	-0.502826	-0.34816
64	245.079	1128.12	17.9578	133.695	0.23852	1.77577
65	265.819	578.253	76.7627	-37.2483	1.01958	-0.494739
66	269.071	1022.86	1.75621	-65.3901	0.0233264	-0.868525
67	273.899	1314.71	40.2289	28.2517	0.534329	0.375246
68	230.58	444.542	93.95	112.168	1.24786	1.48984
69	254.08	681.009	76.495	28.7087	1.01602	0.381315
70	275.716	284.899	106.184	-0.444865	1.41036	-0.0059088
71	257.511	390.5	54.0116	-38.4462	0.717393	-0.51065
72	281.596	60.4947	113.103	-74.7642	1.50226	-0.993034
74	278.141	478.883	-31.5417	81.3096	-0.418944	1.07997
76	264.52	191.816	-7.5178	-3.67806	-0.099853	-0.0488528
77	288.697	1425.3	123.511	24.751	1.6405	0.328748
78	274.132	859.451	-69.7135	79.9797	-0.92595	1.06231
79	286.814	1555.62	-13.1377	48.5337	-0.174498	0.644635
80	312.107	713.618	25.4263	10.3795	0.337717	0.137862
81	308.266	1159.25	116.824	64.7096	1.55169	0.859487
82	304.839	780.313	-57.076	-107.31	-0.758095	-1.42532
83	307.833	953.63	-19.8996	93.1173	-0.264311	1.2368
85	325.284	366.116	-83.2239	26.5694	-1.1054	0.352901
86	351.836	130.149	59.6806	3.16166	0.792691	0.0419938
87	352.264	204.505	62.8558	-1.16576	0.834864	-0.0154839
88	337.427	558.968	42.0867	-31.1562	0.559004	-0.413823
89	352.22	869.733	106.723	-9.51813	1.41752	-0.126422
91	357.226	468.329	-25.5864	7.25345	-0.339845	0.0963418
92	367.911	1503.74	40.2895	148.315	0.535134	1.96995
93	357.62	1293.81	60.5458	-66.1964	0.804182	-0.879235
94	369.322	630.435	-22.9559	-14.6544	-0.304906	-0.194642
95	357.247	64.6218	31.3076	-11.5539	0.415834	-0.153461
96	345.533	948.87	9.43436	54.2369	0.125309	0.720386
97	360.732	1402.67	75.3826	32.5447	1.00125	0.432266
98	375.213	993.822	92.635	7.47215	1.2304	0.0992467
99	379.527	290.533	93.4054	78.5164	1.24063	1.04287
100	371.38	1099.44	9.78629	-103.406	0.129984	-1.37346
101	396.735	1189.21	53.8642	60.3582	0.715435	0.801691
102	379.69	395.543	82.3584	32.255	1.0939	0.428418
103	414.491	752.54	-20.3055	-123.956	-0.269702	-1.6464
104	421.265	565.015	148.745	25.7996	1.97567	0.342676
105	410.543	674.075	6.20662	-78.4588	0.0824377	-1.04211
106	400.105	1556.4	53.7174	124.041	0.713486	1.64753
108	422.61	824.575	-55.5458	129.491	-0.737771	1.71993
109	434.848	1084.43	-25.568	49.4377	-0.3396	0.656642
111	446.055	910.606	59.1985	161.307	0.786287	2.14251
112	432.29	1396.87	35.0894	1.14544	0.466065	0.0152139
113	430.567	1244.04	4.72885	30.2972	0.0628096	0.402414
114	432.452	230.752	-64.6566	19.9427	-0.858783	0.264884
115	438.617	504.798	14.6648	-0.340173	0.194781	-0.00451825
116	412.833	1315.08	28.6956	14.18	0.381141	0.188341
117	430.506	413.947	-7.47444	58.6858	-0.0992771	0.779477
118	447.8	84.2279	133.314	-83.8985	1.77071	-1.11436
119	439.925	994.401	173.387	68.0905	2.30296	0.904393
120	461.159	188.15	-19.883	31.9394	-0.26409	0.424225
121	461.615	310.476	100.533	-106.8	1.33529	-1.41853
122	464.248	1546.12	78.9882	30.0277	1.04914	0.398835
123	486.472	1261.48	91.0621	-16.7449	1.20951	-0.22241
124	471.907	1474.99	63.5545	-24.6156	0.844145	-0.32695
125	501.013	140.702	68.1505	-29.0968	0.905189	-0.38647
126	506.445	735.865	142.527	30.9362	1.89308	0.410902
127	527.245	1318.92	-13.0134	-58.5261	-0.172846	-0.777356
128	497.017	416.117	21.6237	-59.1342	0.287211	-0.785433
129	496.143	1165.87	3.46975	69.2545	0.046086	0.919854
130	491.823	1029.93	50.696	186.764	0.673355	2.48064
131	514.708	550.504	140.867	-3.22639	1.87102	-0.0428537
132	505.701	657.427	81.9168	-27.1624	1.08804	-0.360777
133	509.899	831.457	60.0551	33.3631	0.797665	0.443136
134	530.332	1577.2	79.9275	-35.5048	1.06161	-0.471583
136	512.689	1390.09	-8.47265	8.20874	-0.112536	0.10903
138	530.107	307.772	-18.2495	63.1547	-0.242394	0.838834
139	532.882	968.869	-31.1874	60.1957	-0.414238	0.799532
140	539.481	101.157	0.730377	14.1917	0.00970103	0.188498
141	549.298	458.761	81.3672	77.9337	1.08074	1.03513
142	549.173	189.311	-59.7718	-75.9967	-0.793902	-1.0094
143	567.954	924.701	28.9521	-19.8719	0.384547	-0.263943
144	570.802	1417.29	36.4188	-25.4694	0.483722	-0.33829
145	577.174	1078.76	-13.3273	-19.4606	-0.177017	-0.25848
146	565.519	644.726	14.0602	-77.3714	0.186751	-1.02766
147	571.905	242.52	168.403	-28.1241	2.23676	-0.373551
148	541.868	1051.11	17.9623	-23.3464	0.23858	-0.310092
149	572.195	1488.67	58.7612	-10.466	0.780478	-0.139011
150	590.101	1243.56	165.748	-36.0271	2.2015	-0.478519
152	563.876	1160.93	122.051	11.1413	1.62111	0.147981
153	591.635	396.124	20.5829	-58.8877	0.273387	-0.782159
154	609.047	856.606	115.306	-2.11415	1.53152	-0.0280805
155	598.493	760.918	126.39	-117.798	1.67874	-1.56462
156	616.212	600.561	-12.6127	111.748	-0.167524	1.48426
157	646.613	1487.83	78.4798	58.3336	1.04238	0.774799
158	626.04	99.951	24.8327	132.076	0.329834	1.75426
159	609.044	317.014	114.272	92.6007	1.51778	1.22994
160	593.992	486.492	17.5857	-132.59	0.233578	-1.76109
161	618.226	183.741	17.3138	1.6119	0.229966	0.0214096
162	646.476	1574.81	-41.6562	-83.0715	-0.553286	-1.10337
164	604.153	1321.97	110.04	-22.6322	1.46157	-0.300605
165	624.181	1007.94	-46.3236	-45.7105	-0.61528	-0.607137
167	638.935	1160.7	-23.951	-32.3565	-0.318122	-0.429766
168	652.237	498.705	25.2819	40.5275	0.335799	0.538295
169	650.948	231.041	137.847	5.32928	1.83091	0.0707846
170	671.358	403.799	15.6849	103.711	0.20833	1.37751
171	674.812	1074.19	100.276	-82.622	1.33189	-1.0974
172	674.826	975.84	79.8767	47.4026	1.06094	0.629612
173	677.128	1301.48	112.292	-12.8607	1.49149	-0.170819
174	668.396	744.792	134.518	13.6688	1.78669	0.181553
175	667.263	1382.71	53.1901	117.868	0.706483	1.56555
176	669.45	320.901	46.52	48.1831	0.617889	0.639978
177	697.881	899.507	51.4704	-39.6464	0.683641	-0.526592
178	715.479	103.85	36.9559	-50.8683	0.490856	-0.675644
179	666.704	599.641	5.80979	31.0251	0.0771668	0.412083
180	711.318	1212.7	175.818	62.212	2.33526	0.826313
181	710.508	639.217	155.265	188.884	2.06227	2.50879
183	699.476	1147.01	104.957	0.476707	1.39405	0.00633173
184	724.347	379.977	-50.9697	77.7387	-0.67699	1.03254
185	726.097	275.516	31.1155	96.9981	0.413283	1.28835
186	707.449	1379.33	-27.2017	-5.90446	-0.361299	-0.0784243
187	745.929	177.335	104.326	63.3342	1.38568	0.841218
188	719.791	504.368	-23.3919	-22.1882	-0.310697	-0.294709
189	746.609	1427.02	217.614	-8.51331	2.89039	-0.113076
190	737.305	811.212	25.4838	17.2042	0.338481	0.22851
191	738.873	1551	75.9383	-63.5553	1.00863	-0.844155
192	760.764	740.518	-62.1683	98.8461	-0.825733	1.31289
193	751.833	1346.82	-16.4249	-8.49927	-0.21816	-0.112889
194	744.02	1142.07	48.5826	52.9915	0.645285	0.703845
195	775.811	888.887	54.442	-6.07721	0.72311	-0.0807189
196	777.197	1081.64	134.111	57.1959	1.7813	0.759688
198	785.348	1238.52	25.2839	22.4375	0.335826	0.29802
199	792.654	409.092	57.5002	2.40317	0.76373	0.0319194
201	775.998	522.776	80.0974	-35.991	1.06387	-0.478041
202	780.394	612.464	-44.6982	-167.693	-0.593691	-2.22733
203	763.316	978.636	44.6604	74.0596	0.593188	0.983675
204	829.185	262.389	81.4284	-9.36698	1.08155	-0.124414
205	792.527	325.685	113.652	-46.5614	1.50955	-0.618439
206	801.123	1484.02	33.2938	-116.776	0.442215	-1.55104
208	811.544	92.0755	24.0675	65.124	0.319669	0.864991
209	824.013	1326.79	24.0213	125.308	0.319057	1.66436
210	812.085	202.344	115.356	-0.323396	1.53218	-0.00429542
211	811.307	148.099	17.261	4.68343	0.229265	0.0622064
212	815.397	459.724	50.7663	-18.5833	0.674289	-0.246827
213	828.62	976.319	88.4373	32.3838	1.17464	0.430129
214	825.804	655.47	-16.1206	24.4996	-0.214118	0.325408
216	848.197	811.496	39.3118	44.9885	0.522147	0.597547
217	862.782	1547.11	-12.942	-13.8286	-0.171898	-0.183674
218	850.952	770.245	6.13341	-62.4348	0.0814653	-0.829273
219	848.425	1098.83	-14.3723	-84.3643	-0.190896	-1.12054
220	864.199	480.502	26.8108	-12.4547	0.356107	-0.165426
221	868.444	891.209	0.153513	-31.2087	0.002039	-0.41452
222	869.3	1457.62	126.606	31.2757	1.68161	0.415411
223	875.563	1365.52	78.2836	182.07	1.03978	2.41829
224	889.059	608.002	199.399	29.6289	2.64845	0.393537
225	874.571	321.909	107.252	-35.4754	1.42454	-0.471192
226	916.674	1295.07	130.042	76.9514	1.72724	1.02209
227	869.345	129.94	44.1698	-25.277	0.586673	-0.335734
228	878.915	394.137	-11.027	-55.3056	-0.146463	-0.734581
229	893.372	204.948	137.997	31.9035	1.83291	0.423749
230	914.865	511.367	199.99	92.3521	2.65632	1.22664
231	907.819	701.941	122.423	-68.949	1.62605	-0.915795
232	904.449	1217.94	212.852	-11.4304	2.82715	-0.15182
233	885.924	54.2778	7.58092	-29.8811	0.100691	-0.396888
235	911.437	1118.38	72.4482	-11.3636	0.962272	-0.150934
236	920.486	1582.32	37.8507	-51.544	0.50274	-0.684618
237	918.041	1005.11	171.995	76.9504	2.28448	1.02207
239	936.078	73.3806	-22.3182	-11.7001	-0.296435	-0.155403
240	951.247	1491.37	125.705	-27.0683	1.66964	-0.359527
241	944.035	1394.44	11.7169	40.7947	0.155627	0.541844
242	956.601	255.953	38.5332	10.3271	0.511806	0.137167
243	936.883	875.818	174.822	-24.5808	2.32203	-0.326487
244	969.37	763.003	103.463	-16.579	1.37422	-0.220206
245	995.969	332.349	32.5293	26.2219	0.432061	0.348285
246	949.268	137.572	41.7459	-21.3525	0.554479	-0.283608
247	954.678	388.34	-44.3463	-18.3046	-0.589017	-0.243125
250	991.132	631.014	133.255	-72.8227	1.76992	-0.967247
251	992.139	1198.7	141.785	-45.1474	1.88322	-0.599657
252	980.085	1082.11	56.8087	123.246	0.754545	1.63697
253	986.663	530.922	124.273	101.362	1.65062	1.34631
254	1011.16	120.397	141.313	89.952	1.87695	1.19476
255	994.224	943.276	-82.2433	-106.472	-1.09237	-1.41418
256	1009.35	1322.53	118.28	12.9352	1.57101	0.171808
257	1004.12	1434.49	-59.7737	-51.4861	-0.793927	-0.68385
258	1038.06	872.377	62.3799	65.9433	0.828543	0.875873
259	1024.24	1028.79	111.701	-60.829	1.48364	-0.807944
260	1040.19	252.164	90.7066	-97.9988	1.20478	-1.30164
262	1043.29	447.984	-9.80303	-32.424	-0.130206	-0.430663
263	1048.21	699.994	76.69	-106.415	1.01861	-1.41343
264	1032.63	1494.04	-29.7454	-163.033	-0.395085	-2.16544
265	1064.89	1104.94	124.745	-42.908	1.65689	-0.569914
266	1058.23	779.934	108.638	-20.8945	1.44295	-0.277526
268	1060.08	1377.74	-17.8417	-42.9357	-0.236977	-0.570281
269	1051.83	576.026	-21.0037	-92.8125	-0.278975	-1.23276
270	1054.81	1225.99	57.7429	24.1439	0.766953	0.320685
271	1082.46	128.263	50.1685	62.0039	0.666349	0.823549
272	1083.72	1514.04	37.1665	-36.7166	0.493653	-0.487678
274	1079.9	1002.5	-13.6134	-62.4049	-0.180816	-0.828875
275	1085.95	372.903	19.9977	31.7904	0.265614	0.422247
276	1116.77	653.256	95.6918	-167.478	1.271	-2.22448
277	1116.55	488.723	14.1485	-39.4418	0.187924	-0.523874
278	1103.17	1426.22	53.4579	-131.984	0.710039	-1.75304
279	1107.66	1566.53	-16.961	-22.2708	-0.225279	-0.295806
280	1114.01	1291.22	26.7075	65.1707	0.354734	0.865611
282	1128.87	307.76	-9.90336	55.1972	-0.131539	0.733141
283	1102.3	1193.21	57.5158	-7.37191	0.763938	-0.0979153
284	1094.63	843.488	-9.04171	0.617865	-0.120094	0.00820661
285	1134.38	220.485	121.904	-52.1288	1.61915	-0.692386
286	1126.96	889.199	89.4115	-148.782	1.18758	-1.97616
287	1131.23	767.634	93.4422	-49.7521	1.24112	-0.660818
288	1148.36	149.739	111.84	24.7456	1.48548	0.328677
289	1152.17	550.746	10.884	24.2436	0.144564	0.322009
290	1155.96	1346.63	25.3009	-130.893	0.336052	-1.73855
291	1162.1	1114.07	84.7172	12.9744	1.12523	0.172329
292	1142.46	973.197	23.1235	-78.461	0.307132	-1.04214
293	1163.12	1038.92	81.7399	24.5136	1.08569	0.325595
295	1155.42	1482.78	63.6991	-123.722	0.846066	-1.64331
296	1157.72	1207.43	183.794	-31.1572	2.4412	-0.413837
297	1213.33	406.118	-36.6959	-16.4108	-0.487403	-0.217971
298	1217.98	61.381	-60.059	84.7733	-0.797716	1.12598
299	1209.54	334.154	30.8809	-25.041	0.410167	-0.332599
300	1224.68	598.027	27.2816	-60.6166	0.36236	-0.805122
301	1199.04	1416.31	32.3377	-85.8497	0.429516	-1.14027
302	1198.97	806.079	29.3704	-10.5497	0.390104	-0.140123
304	1198.47	688.899	-4.88511	-40.091	-0.0648851	-0.532497
305	1209.86	1260.44	-44.102	-17.6031	-0.585772	-0.233808
306	1195.02	883.104	64.1575	-22.2362	0.852153	-0.295347
307	1210.94	1529.97	19.4844	-144.16	0.258796	-1.91476
308	1191.78	290.564	-41.3046	94.2078	-0.548617	1.25129
309	1217.35	740.293	67.6306	-117.155	0.898284	-1.55608
310	1215.81	131.156	-35.8348	-86.0727	-0.475965	-1.14324
311	1213.12	1183.61	30.8957	-179.797	0.410363	-2.3881
312	1234.81	961.859	41.9358	85.0446	0.557	1.12958
313	1233.42	224.528	92.8156	-52.614	1.2328	-0.698831
314	1239.18	480.901	-21.3521	181.44	-0.283604	2.40992
315	1246.87	1047.29	79.6502	-9.0524	1.05793	-0.120236
316	1252.44	1301.41	24.7261	-156.461	0.328417	-2.07815
318	1275.44	1139.79	59.8629	-25.296	0.795111	-0.335987
319	1263.37	872.829	156.469	-20.0907	2.07825	-0.266849
320	1253.62	1407.56	73.0977	-31.5238	0.970899	-0.418706
321	1280.67	671.047	71.4369	-48.7905	0.94884	-0.648046
322	1288.4	758.37	58.2852	24.1337	0.774157	0.320549
323	1272.59	1497.25	125.375	32.7388	1.66526	0.434843
324	1282.88	533.479	48.9065	12.8851	0.649587	0.171143
325	1322.53	347.321	101.634	20.6786	1.34993	0.274658
327	1322.12	206.641	62.8716	16.1944	0.835074	0.215098
329	1333.53	113.317	121.451	-54.532	1.61314	-0.724306
330	1297.13	1556.78	-2.66815	-3.89857	-0.035439	-0.0517816
331	1318.05	847.82	-57.3915	105.181	-0.762286	1.39703
332	1315.36	992.778	43.0736	-56.9169	0.572113	-0.755982
333	1321.17	279.329	-25.2909	-5.56621	-0.335919	-0.0739316
334	1326.4	1393.68	45.7863	6.40252	0.608143	0.0850397
335	1333.08	1258.2	56.8241	36.4577	0.754749	0.484239
336	1325.88	436.349	69.0563	-15.3658	0.917221	-0.204091
337	1334.47	627.13	-84.5185	-91.5493	-1.12259	-1.21598
338	1353.01	1505.85	49.4252	-18.9814	0.656476	-0.252116
340	1368.55	508.598	143.296	-28.1516	1.90328	-0.373916
341	1356.81	1124.22	9.51202	13.8179	0.126341	0.183532
342	1370.31	819.808	12.3175	-70.3278	0.163604	-0.934109
343	1378.44	725.659	69.5775	132.031	0.924144	1.75367
344	1373.72	1008.38	107.701	118.884	1.43051	1.57904
345	1398.64	892.106	128.867	50.3032	1.71164	0.668137
346	1405.22	594.394	98.7045	-42.9509	1.31101	-0.570484
347	1381.93	233.467	62.4251	-31.1665	0.829144	-0.413961
348	1387.32	310.163	-36.7739	37.2469	-0.488439	0.494721
349	1432.75	1185.59	100.221	26.2441	1.33115	0.34858
350	1400.08	1344.84	110.705	170.924	1.47041	2.27024
351	1407.21	940.817	35.2869	17.3096	0.468688	0.229909
353	1404.43	1460.54	-8.03054	-7.88515	-0.106663	-0.104732
354	1409.63	423.816	15.7768	-47.3814	0.209551	-0.62933
355	1446.86	96.553	75.0335	40.9855	0.996611	0.544379
356	1414.14	145.72	-64.7372	23.0681	-0.859853	0.306395
357	1425.73	1284.25	-15.5829	87.7494	-0.206975	1.16551
359	1416.21	1102.37	-5.70561	-5.12524	-0.0757831	-0.0680745
360	1449.43	848.454	82.0877	56.0445	1.09031	0.744395
361	1451.82	767.645	195.471	-22.157	2.59629	-0.294295
362	1456.19	236.502	62.639	54.9688	0.831985	0.730107
363	1464.36	1026.77	87.2751	59.7727	1.15921	0.793914
364	1472.18	1254.99	-13.5584	16.9866	-0.180086	0.22562
365	1466.14	348.755	76.9864	-120.508	1.02255	-1.60061
366	1446.49	1476.36	-3.94253	-1.81995	-0.0523655	-0.024173
367	1482.3	1561.91	49.4948	-74.7313	0.657401	-0.992597
369	1489.59	499.16	125.454	-55.8509	1.66631	-0.741823
370	1468.19	1384.91	-8.66251	13.1656	-0.115057	0.174868
371	1476.42	641.307	-4.97516	13.4395	-0.0660812	0.178506
372	1473.74	937.162	181.098	25.4233	2.40539	0.337678
373	1500.26	1461.36	-49.1427	-30.5323	-0.652724	-0.405536
374	1512.68	1121.9	-60.464	-23.6272	-0.803096	-0.313822
375	1520.61	1345.82	-21.1291	1.04048	-0.280641	0.0138199
376	1514.8	395.282	-52.8078	60.5406	-0.701405	0.804113
377	1533.82	869.657	113.157	-44.352	1.50298	-0.589092
378	1547.6	1508.64	64.4463	-56.2173	0.85599	-0.74669
379	1524.26	779.959	132.716	81.181	1.76276	1.07826
380	1546	1220.27	164.671	76.6706	2.18719	1.01836
381	1542.17	79.8067	-15.4898	135.357	-0.205739	1.79784
382	1577.24	1051.73	56.5866	-30.6136	0.751595	-0.406616
383	1555.12	603.42	-1.08956	45.6936	-0.0144717	0.606912
384	1543.45	272.32	-45.4967	43.5071	-0.604297	0.577871
385	1550.01	1008.52	-18.2398	-9.3203	-0.242265	-0.123794
386	1564.28	185.896	72.4075	20.9454	0.961732	0.278201
387	1570.07	479.879	94.9689	7.0937	1.2614	0.09422
389	1562.1	1299.72	-12.4548	48.6564	-0.165427	0.646264
390	1564.3	707.999	-34.7022	-3.7076	-0.460922	-0.0492451
391	1572.42	339.3	51.5547	90.2507	0.68476	1.19873
393	1596.94	408.128	67.7974	118.99	0.9005	1.58046
394	1590.41	1136.82	-42.7083	-19.2627	-0.567261	-0.255852
397	1595.75	782.088	69.6139	-39.9255	0.924627	-0.530299
28	63.5116	1522.2	66.4833	96.7252	0.942278	1.3709		0.699021	175.67
29	64.4243	65.5036	118.076	34.4068	1.67351	0.487652
30	82.4364	272.338	60.1534	-37.7115	0.852563	-0.53449
31	74.4471	1412.51	-81.7042	-52.0054	-1.15801	-0.737079
32	95.8011	447.11	97.4854	-60.0575	1.38167	-0.851203
33	80.4347	1001.46	53.9799	122.961	0.765065	1.74274
34	85.9446	132.712	10.7083	-2.87954	0.15177	-0.0408121
35	108.534	1095.94	43.9529	-76.3076	0.62295	-1.08152
36	108.047	611.469	57.6689	-47.9185	0.817349	-0.679156
37	126.574	684.246	71.1265	-14.1617	1.00809	-0.200715
38	93.3454	1280.66	-27.8781	-11.2516	-0.39512	-0.15947
39	112.303	201.771	73.2504	-16.2121	1.03819	-0.229777
40	130.412	1187.77	106.738	-88.7019	1.51282	-1.25718
41	95.1092	1597.54	-5.85723	37.4498	-0.0830153	0.530781
42	117.632	936.678	142.306	147.864	2.01693	2.09569
43	126.961	517.738	75.6254	-26.7766	1.07185	-0.379508
44	125.376	1361.64	-5.35167	31.6217	-0.0758499	0.448178
45	157.798	338.521	69.3074	8.33504	0.982303	0.118134
46	148.904	390.891	5.32929	27.5015	0.0755328	0.389783
47	166.229	1474.19	66.279	-40.3227	0.939382	-0.5715
48	154.069	73.9302	150.49	13.7105	2.13291	0.194321
49	155.021	786.028	-9.32507	75.5803	-0.132166	1.07121
50	155.668	1552.79	96.8602	56.6054	1.37281	0.802276
51	184.386	853.958	94.7426	21.6247	1.3428	0.30649
53	145.859	1638.76	69.3976	-26.3194	0.983581	-0.373029
54	160.428	265.308	146.736	-99.1698	2.07971	-1.40555
55	169.731	1302.84	-20.1403	38.1097	-0.285451	0.540135
57	197.907	570.199	22.6428	40.7281	0.32092	0.577245
58	167.831	158.984	-25.9914	30.8704	-0.36838	0.43753
60	188.218	1002.42	140.69	84.9066	1.99401	1.20339
61	185.152	1397.11	152.104	7.25284	2.1558	0.102796
62	196.451	1138.13	6.14605	-59.9763	0.0871088	-0.850052
63	210.993	436.59	19.3321	-56.495	0.273997	-0.800711
64	205.95	686.532	-43.6021	60.7174	-0.617978	0.860557
65	232.685	920.116	120.802	-12.042	1.71215	-0.170674
66	231.236	1270.3	-50.5146	-29.6785	-0.715951	-0.420638
67	229.7	1066.79	-48.4686	57.4721	-0.686952	0.81456
68	212.423	1601.84	67.1042	58.8332	0.951077	0.833852
70	218.939	261.543	-8.07708	17.7107	-0.114478	0.251017
71	266.456	212.526	53.9842	97.3072	0.765126	1.37915
72	256.631	143.933	52.1937	15.5361	0.739749	0.220195
73	228.876	377.328	79.283	-43.783	1.12369	-0.620542
74	266.233	490.023	-13.4637	-7.19588	-0.190823	-0.101988
75	277.706	293.067	-70.5423	-48.8409	-0.999805	-0.69223
76	270.606	746.081	118.897	75.7129	1.68514	1.07309
78	269.682	1637.09	90.0457	89.8703	1.27623	1.27374
79	268.175	1464.54	6.69896	29.0736	0.0949453	0.412065
80	273.674	656.584	46.8474	-135.08	0.663975	-1.91451
81	267.915	1149.71	-5.88253	2.7828	-0.083374	0.039441
82	283.38	840.159	59.826	22.8222	0.847922	0.323463
83	340.972	1422.88	64.0166	1.49267	0.907316	0.0211558
84	297.748	1569.69	-5.10947	33.6436	-0.0724173	0.476835
85	280.645	986.411	119.143	-95.3422	1.68863	-1.3513
86	301.136	367.437	0.505743	-4.9049	0.00716797	-0.0695178
87	336.171	1335.93	189.391	2.20285	2.68426	0.0312213
88	304.624	566.112	97.9684	-17.4746	1.38852	-0.24767
89	259.313	873.843	183.503	17.4088	2.60082	0.246738
91	322.309	1202.07	49.0017	0.959668	0.694509	0.0136015
92	315.473	1273.53	18.5944	-62.6126	0.263542	-0.887416
93	346.002	1111.59	75.2273	-57.9405	1.06621	-0.821199
95	352.157	437.168	79.3668	45.8141	1.12488	0.64933
96	349.247	653.739	122.906	7.17857	1.74197	0.101743
97	362.733	161.801	54.4472	-31.2572	0.771688	-0.443012
99	338.69	1007.97	152.122	7.02663	2.15604	0.0995895
100	358.071	751.589	79.4796	61.4379	1.12648	0.870768
101	370.293	1574.26	-34.6848	-36.9656	-0.491593	-0.523919
102	369.776	267.876	91.5164	-23.0266	1.29708	-0.32636
103	366.164	847.788	15.1546	-10.5251	0.214788	-0.149174
104	378.319	511.034	-4.84765	50.847	-0.0687065	0.720662
105	387.234	918.642	46.2628	-15.3093	0.655688	-0.21698
106	412.601	1496.86	5.17756	-122.89	0.0733823	-1.74174
107	415.465	339.734	146.521	-30.7878	2.07666	-0.436359
108	414.16	621.091	-104.69	86.4443	-1.48378	1.22519
109	417.441	1274.31	-44.541	7.39642	-0.631285	0.10483
110	421.682	980.959	38.081	37.5707	0.539727	0.532495
111	402.403	1082.53	-26.2664	-74.5506	-0.372277	-1.05662
112	448.209	1379.34	3.49636	57.5184	0.0495543	0.815217
113	421.624	1668.27	148.02	-51.839	2.09791	-0.734722
115	447.828	800.159	64.4296	94.8225	0.91317	1.34393
117	444.931	88.7191	52.4729	71.9566	0.743706	1.01985
118	452.179	1215.92	86.678	63.9926	1.2285	0.906976
119	471.566	1057.9	63.0654	56.7681	0.893834	0.804582
120	450.639	457.235	7.11322	49.3839	0.100817	0.699924
121	461.072	1575.71	22.9894	57.9069	0.325832	0.820722
122	454.703	391.575	50.0832	-24.4182	0.709836	-0.346083
123	486.141	180.963	24.4271	20.6081	0.346209	0.292081
124	475.644	714.558	89.0648	99.232	1.26233	1.40643
125	504.965	587.133	96.465	67.8568	1.36721	0.961744
126	490.545	1150.7	136.774	18.6953	1.93852	0.264971
127	472.47	252.968	124.997	101.756	1.77159	1.44221
128	490.706	891.537	134.048	-63.0129	1.89988	-0.893091
129	528.533	1458.25	80.9632	57.2096	1.1475	0.81084
131	516.326	1688.37	84.5645	57.136	1.19854	0.809796
132	558.726	545.76	-134.708	74.8699	-1.90923	1.06114
133	536.322	655.641	-50.7876	12.575	-0.71982	0.178228
134	532.686	280.002	76.3623	110.322	1.08229	1.5636
136	547.891	965.871	-40.2276	57.4602	-0.570152	0.814391
137	535.955	372.262	122.541	4.51851	1.7368	0.0640415
138	538.483	1319.34	105.635	111.557	1.49717	1.58111
140	540.954	455.079	9.12134	-32.5131	0.129278	-0.460813
141	539.463	1582.11	-38.3469	-59.8632	-0.543496	-0.848449
142	546.579	77.4943	39.1362	-0.241892	0.554683	-0.00342836
143	566.256	1244.07	195.523	131.957	2.77117	1.87025
144	570.469	847.812	-10.4616	31.0791	-0.148274	0.440489
145	554.277	738.487	91.121	55.9914	1.29147	0.793573
146	584.771	494.645	64.6962	-130.225	0.916948	-1.84569
147	566.951	1136.18	129.979	4.68816	1.84222	0.0664459
148	619.384	1046.55	74.318	40.8424	1.05332	0.578865
150	586.008	1627.28	97.562	-111.845	1.38276	-1.5852
151	600.777	200.067	106.893	12.7473	1.51501	0.180669
153	617.601	1510.1	-2.94772	64.8024	-0.0417785	0.918454
154	596.407	1685.71	0.653664	-35.7821	0.00926447	-0.507144
155	620.352	1355.03	27.559	28.737	0.390597	0.407294
156	623.891	125.022	61.9312	72.0879	0.87776	1.02171
157	595.05	292.569	86.8246	17.951	1.23058	0.254422
158	653.344	1166.71	65.8323	23.0232	0.933051	0.326311
159	627.236	910.402	89.499	38.0775	1.26848	0.539678
160	644.844	399.626	155.937	66.5561	2.21011	0.943309
162	624.554	731.918	-116.609	80.4189	-1.65271	1.13979
164	646.208	598.2	45.3398	-40.9232	0.642607	-0.58001
165	658.923	272.099	9.00354	-7.51007	0.127608	-0.106441
166	661.291	786.845	87.765	95.1451	1.24391	1.3485
167	680.644	1436.96	85.0886	-44.6423	1.20597	-0.632722
168	665.938	673.635	115.091	48.1754	1.63119	0.682797
169	678.971	1279.5	42.1373	113.528	0.597218	1.60905
170	663.157	1653.4	43.2218	79.0102	0.612589	1.11982
171	696.606	1569.52	39.1754	-5.74238	0.555238	-0.0813876
172	699.173	513.736	112.947	9.59984	1.60081	0.13606
173	696.088	887.051	54.8477	18.8168	0.777364	0.266693
174	707.263	953.672	68.7596	-54.7033	0.97454	-0.775318
175	701.875	325.593	0.71675	24.7232	0.0101586	0.350406
176	711.553	1034.18	27.3419	108.199	0.38752	1.53351
177	720.697	179.985	287.061	29.9194	4.06855	0.424052
178	729.908	1212.4	81.3813	101.471	1.15343	1.43816
179	729.221	842.594	47.3012	66.7117	0.670406	0.945514
180	738.6	780.417	105.595	66.2548	1.49661	0.939038
181	743.978	113.459	40.1559	63.2088	0.569135	0.895868
182	746.112	1122.1	123.616	13.7271	1.75203	0.194556
183	754.464	1361.09	29.8461	32.6874	0.423013	0.463283
184	732.185	666.021	126.11	-35.5954	1.78737	-0.504499
186	750.059	1684.21	44.0764	38.9428	0.624701	0.551942
187	762.986	364.698	75.3927	-94.0485	1.06855	-1.33296
188	768.616	1521.11	87.2967	123.919	1.23727	1.75632
189	780.924	479.96	64.124	-58.8061	0.908839	-0.833467
190	786.848	1441.67	154.85	-35.251	2.19472	-0.499617
191	793.916	245.602	30.5276	74.5381	0.432672	1.05644
192	780.546	994.086	-29.6634	35.4011	-0.420424	0.501745
193	784.767	1611.48	-35.3636	30.7209	-0.501213	0.435411
194	801.033	1274.75	-22.8863	-0.994882	-0.32437	-0.0141006
195	793.39	617.2	-18.5952	-89.8946	-0.263552	-1.27409
197	803.498	920.838	85.9413	163.249	1.21806	2.31375
198	811.547	1050	84.9113	47.4634	1.20346	0.672706
199	817.091	837.439	21.9954	10.2882	0.311744	0.145816
200	821.995	709.327	55.9398	44.224	0.792842	0.626794
201	838.523	387.118	98.7523	36.9114	1.39963	0.52315
202	856.926	514.455	64.4264	-17.6558	0.913124	-0.250239
204	848.365	1117.21	49.6692	-77.796	0.703969	-1.10261
205	851.613	153.793	132.409	-140.056	1.87666	-1.98503
206	852.998	1655.12	64.82	21.3269	0.918703	0.302269
207	860.444	1537.24	119.694	-18.1231	1.69644	-0.256861
208	879.974	632.174	117.702	94.5486	1.6682	1.34005
209	890.232	778.097	-11.8241	-31.8348	-0.167585	-0.451199
210	891.918	1198.41	185.724	-109.053	2.63229	-1.54562
211	884.711	992.371	18.2786	133.866	0.259065	1.8973
212	881.912	243.787	70.8243	-22.426	1.0038	-0.317847
213	865.555	1425.68	65.5196	-27.8712	0.928619	-0.395023
214	877.368	1278.66	15.2018	-9.0763	0.215457	-0.12864
215	924.675	1311.58	-34.4493	-37.2507	-0.488255	-0.52796
216	903.125	899.121	137.566	-45.4027	1.94975	-0.643498
217	936.551	1631.26	212.483	-93.6771	3.01155	-1.3277
218	928.961	383.788	90.8036	30.0608	1.28697	0.426055
220	918.054	1560.07	26.7627	11.0964	0.379312	0.157271
221	929.381	81.2614	112.651	-134.76	1.59662	-1.90997
223	934.726	1417.11	27.5562	-85.418	0.390558	-1.21064
224	952.853	1071.08	14.3152	-102.511	0.202892	-1.4529
225	955.532	510.892	31.5749	22.9753	0.447516	0.325633
226	988.355	147.311	103.277	-43.1713	1.46376	-0.611873
227	990.945	291.211	64.448	-29.3143	0.91343	-0.415476
228	953.718	642.738	121.794	-45.8434	1.7262	-0.649745
230	967.272	1511.65	82.4194	-9.2328	1.16814	-0.130858
231	995.719	1366.36	167.749	-79.1319	2.37753	-1.12155
232	989.947	841.094	-9.71308	-94.0857	-0.137665	-1.33349
233	979.815	1159.68	110.182	-88.3089	1.56163	-1.25161
234	980.626	911.779	-62.8087	54.1465	-0.890196	0.767426
235	986.049	217.445	69.1466	68.5824	0.980024	0.972028
236	1016.31	734.037	-46.2871	-6.32203	-0.656034	-0.089603
237	1030.55	967.368	47.4978	-26.6907	0.673193	-0.378291
238	987.368	1244.43	190.942	56.4523	2.70624	0.800107
239	1027.85	408.915	81.2149	-8.90644	1.15107	-0.126232
240	1025.33	611.225	88.8862	-18.4862	1.2598	-0.262007
241	1028.09	54.3068	48.1861	-70.2547	0.682948	-0.99573
243	1054.41	801.815	122.438	190.861	1.73534	2.70511
244	1040.85	1245.38	89.3787	6.23316	1.26678	0.0883435
245	1036.23	1489.38	84.2605	16.48	1.19424	0.233573
246	1056.59	1051.82	38.8786	6.53152	0.551032	0.0925722
247	1044.55	101.503	66.5158	78.8426	0.942737	1.11745
248	1077.51	533.575	73.9419	-24.3378	1.04799	-0.344944
249	1035.84	199.714	53.5212	19.2784	0.758563	0.273236
251	1079.22	1118.55	19.3736	-22.2564	0.274584	-0.315443
252	1089.06	1531.91	17.9239	7.02191	0.254038	0.0995225
253	1076.46	1336.4	-12.2175	64.3151	-0.17316	0.911547
254	1096.94	234.636	141.202	49.6634	2.00128	0.703887
255	1116.4	1395.38	29.9905	84.8685	0.42506	1.20285
256	1126.72	349.702	77.9314	-27.5973	1.10453	-0.39114
257	1099.58	1201.82	1.89977	33.8577	0.0269257	0.479869
258	1092.31	136.317	65.6784	33.7733	0.930869	0.478674
259	1129.3	805.5	182.256	-65.6217	2.58314	-0.930065
260	1153.78	439.081	114.542	-27.8015	1.62343	-0.394034
261	1127.78	938.708	-44.4474	-7.86994	-0.62996	-0.111542
262	1132.72	662.161	173.474	-53.6227	2.45867	-0.760003
263	1128.25	1590.57	-14.2556	-109.248	-0.202046	-1.54838
265	1143.42	1650.89	49.469	-14.2742	0.701131	-0.20231
266	1158.62	1293.8	-8.11434	97.5113	-0.115006	1.38204
267	1165.68	1024.81	37.2623	-17.632	0.528124	-0.249901
268	1177.35	247.623	121.743	-60.0333	1.72548	-0.85086
269	1156.43	122.508	-10.9171	31.9495	-0.15473	0.452824
270	1150.13	1465.05	-61.1267	-16.4957	-0.866357	-0.233795
271	1183.11	1128.77	86.0735	9.17382	1.21993	0.130022
272	1180.71	525.385	51.494	1.60439	0.729831	0.0227392
273	1210.61	832.864	108.533	99.4494	1.53825	1.40951
274	1182.9	1217.2	-0.0953891	7.22901	-0.00135196	0.102458
276	1202.26	1494.92	-28.7582	-129.327	-0.407595	-1.83297
279	1214.66	676.508	51.693	44.7062	0.732652	0.633627
280	1224.37	1332.14	73.5965	-113.127	1.04309	-1.60337
281	1232.66	350.692	56.4481	-13.965	0.800047	-0.197928
282	1251.9	963.455	53.4398	-58.8848	0.75741	-0.834583
283	1243.73	1670.74	-75.2268	14.5908	-1.0662	0.206798
284	1245.08	166.249	-50.7791	5.897	-0.719699	0.083579
285	1244.8	1554.74	-63.9785	-146.112	-0.906777	-2.07087
286	1257.37	550.821	-5.39851	20.9291	-0.0765138	0.296632
287	1264.2	1125.14	44.0673	-7.0126	0.624572	-0.0993906
288	1296.31	619.006	75.5903	25.1314	1.07135	0.35619
289	1287.02	1407.66	-34.676	-100.999	-0.491468	-1.43148
290	1294.69	105.393	18.6498	66.2933	0.264326	0.939585
291	1286.24	278.834	18.7428	73.8362	0.265644	1.04649
292	1296.44	466.357	181.142	128.66	2.56735	1.82351
293	1330.06	1259.28	-52.1402	-135.604	-0.73899	-1.92193
294	1298.38	1308.2	-28.6916	-139.153	-0.40665	-1.97223
296	1294.14	788.829	-2.3517	-5.50623	-0.0333309	-0.0780406
297	1305.57	1618.31	56.1301	1.72184	0.795539	0.0244039
298	1337.13	687.566	29.6427	71.2056	0.420131	1.00921
299	1327.59	1522.76	147.896	41.3859	2.09615	0.586568
300	1334.97	377.725	28.7443	51.8026	0.407397	0.734205
302	1323.14	207.606	-31.412	-7.20641	-0.445207	-0.102137
303	1341.66	882.057	66.4401	34.3749	0.941665	0.4872
305	1336.52	973.545	89.8747	-29.2288	1.27381	-0.414264
306	1355.58	1095.15	99.7812	-55.0088	1.41421	-0.779648
307	1383.76	1201.45	94.5828	-23.4631	1.34054	-0.332546
308	1363.62	1652.86	23.288	-31.6345	0.330064	-0.44836
309	1344.15	71.2379	29.1888	-7.29135	0.413698	-0.103341
310	1341.14	1450.22	50.3118	-8.66506	0.713076	-0.122811
311	1381.07	793.702	102.855	18.3049	1.45778	0.259438
312	1373.28	509.189	28.6947	93.1655	0.406694	1.32045
313	1378.29	1388.05	0.929326	24.3562	0.0131715	0.345204
314	1377.78	213.039	-57.5839	-46.6305	-0.816145	-0.660901
315	1391.8	109.694	-11.8996	-19.8652	-0.168654	-0.281552
316	1415.93	311.446	49.2502	59.9875	0.69803	0.850211
317	1408.87	609.353	67.4345	56.977	0.955759	0.807543
318	1402.59	1539	1.24587	-79.8133	0.0176579	-1.1312
320	1415.58	1124.41	42.3602	8.36996	0.600377	0.118629
322	1438.82	426.07	45.2396	99.1534	0.641187	1.40532
323	1429.35	933.052	9.75942	-19.5423	0.138322	-0.276975
324	1450.34	1469.97	87.7583	-1.62165	1.24381	-0.0229838
325	1455.98	683.859	-44.3747	-12.5099	-0.628928	-0.177305
326	1455.41	1299.29	22.9557	14.8301	0.325354	0.21019
327	1466.98	541.19	-5.01086	75.4441	-0.0710196	1.06928
328	1459.61	1049.09	201.403	35.3215	2.85452	0.500617
329	1488.28	1578.23	25.3842	-17.3912	0.359774	-0.246489
330	1438.07	1647.38	-0.553019	44.5313	-0.00783801	0.631149
331	1445.27	131.52	-9.73571	1.02913	-0.137986	0.0145859
332	1453.59	226.303	-15.0472	30.3818	-0.213267	0.430605
333	1452.19	802.67	50.1124	34.8372	0.71025	0.493753
334	1469.37	1181.14	87.6522	-13.9836	1.24231	-0.198191
336	1555.77	950.215	-68.1369	-7.45867	-0.965714	-0.105713
337	1514.81	1355.87	22.4593	40.9368	0.318319	0.580204
338	1489.29	1673.12	18.9751	-51.6202	0.268936	-0.73162
339	1522.71	854.485	-35.8045	0.986075	-0.507463	0.0139758
340	1525.98	1450.13	68.8292	31.2135	0.975525	0.442393
341	1511.44	315.975	-24.5435	12.9086	-0.347858	0.182955
343	1507.21	936.032	-71.0942	-2.60357	-1.00763	-0.0369008
344	1510.84	186.71	-38.3122	20.2518	-0.543004	0.287032
345	1515.94	735.837	-31.0911	-18.6353	-0.440659	-0.264121
346	1532.93	470.984	133.237	13.5331	1.88839	0.191806
347	1538.11	604.427	49.6034	81.8207	0.703036	1.15966
348	1536.73	373.263	41.187	43.0606	0.583749	0.610303
349	1543.48	1062.93	90.2628	175.031	1.27931	2.48074
351	1541.61	1199.71	5.0282	-36.0795	0.0712654	-0.51136
353	1579.81	207.444	-32.0337	96.718	-0.454018	1.3708
354	1579.39	774.391	16.9351	-2.69513	0.240023	-0.0381985
355	1582.97	658.352	-1.46501	-69.9908	-0.0207638	-0.991989
357	1584.95	1578.25	-21.0657	-10.8943	-0.298567	-0.154406
359	1594.38	1279.85	38.5205	24.8325	0.545956	0.351955
361	1586.76	126.889	33.0606	18.6493	0.468573	0.26432
364	1581.26	290.027	-62.0162	-107.065	-0.878965	-1.51744
381	1640.31	49.3846	-20.1408	-29.0511	-0.285458	-0.411745

## Sheet: Control+M21Polarity
16	78.7564	1132.56	-109.816	-127.861	-1.517	-1.76628		0.463258	14.1292
17	108.017	191.234	62.5556	-143.493	0.864142	-1.98221
18	68.1259	758.409	-73.5125	36.5463	-1.0155	0.50485
19	69.9019	907.51	-13.2913	-16.3085	-0.183606	-0.225285
20	99.9505	394.87	-9.38587	-13.9836	-0.129656	-0.19317
21	101.598	504.064	2.24518	-110.215	0.0310149	-1.5225
22	109.458	654.814	27.9919	-14.9173	0.38668	-0.206067
23	102.485	1367.12	-183.969	26.4992	-2.54134	0.366059
24	154.27	863.942	-131.071	17.4162	-1.81061	0.240587
25	144.707	327.169	128.687	-73.5968	1.77767	-1.01667
26	121.563	729.133	-91.5845	24.7236	-1.26515	0.341531
27	151.22	957.898	-65.2572	-62.4718	-0.901462	-0.862985
28	149.698	1184.98	-7.59544	-47.7176	-0.104923	-0.65917
29	185.27	1331.5	24.5683	-18.1949	0.339386	-0.251344
30	161.669	555.185	-47.4178	-73.5646	-0.655029	-1.01622
31	166.483	1246.31	40.0195	-17.4086	0.552829	-0.240482
32	190.793	67.2166	58.559	-112.592	0.808934	-1.55534
33	201.383	475.436	0.444962	-28.6623	0.0061467	-0.39594
34	231.308	1098.44	44.1231	44.178	0.609516	0.610274
35	216.902	292.221	130.97	-80.652	1.80922	-1.11413
36	178.048	729.253	-84.6853	14.9	-1.16984	0.205828
37	225.152	643.892	-11.3559	-42.4579	-0.15687	-0.586512
39	226.984	124.507	173.805	-132.989	2.40094	-1.83711
40	247.368	194.798	134.928	20.3897	1.8639	0.281663
41	233.613	847.729	32.0471	18.2147	0.442698	0.251617
42	234.176	766.252	103.935	-37.9145	1.43575	-0.52375
43	259.735	431.499	-41.9661	-6.8182	-0.579719	-0.0941865
44	282.413	1266.43	-34.601	-2.91988	-0.477978	-0.0403352
45	258.078	974.143	42.8873	-33.1226	0.592444	-0.457555
46	303.459	588.853	-12.2447	12.0361	-0.169149	0.166266
48	314.673	94.1693	78.2591	-58.9734	1.08107	-0.814658
50	349.161	278.575	102.229	-81.9975	1.41219	-1.13271
52	325.761	809.637	63.1726	-0.173052	0.872666	-0.00239054
53	345.1	352.381	7.16383	42.495	0.0989611	0.587025
54	336.475	898.958	13.0574	-4.90888	0.180374	-0.0678112
55	341.606	723.897	53.637	-37.9967	0.740941	-0.524886
56	385.399	153.885	18.5306	-92.251	0.255982	-1.27435
57	359.312	466.13	-78.9899	-164.597	-1.09117	-2.27375
58	347.681	988.936	-17.7082	-36.6341	-0.24462	-0.506062
59	359.195	1115.17	67.3588	14.8212	0.930493	0.204739
60	378.437	1225.3	-119.829	53.8159	-1.65532	0.743412
61	397.667	569.997	52.8844	-5.66153	0.730544	-0.0782083
63	410.913	1056.78	-83.2403	39.3238	-1.14988	0.543218
64	426.542	643.897	71.4726	-64.8378	0.987321	-0.895668
65	444.899	407.506	98.5569	77.0786	1.36146	1.06476
67	427.336	1361.87	79.8166	-158.445	1.10259	-2.18875
68	421.611	836.37	135.617	138.519	1.87342	1.9135
69	428.218	729.342	68.3494	-21.4707	0.944177	-0.296596
70	449.343	240.814	-2.87245	-59.2685	-0.03968	-0.818735
71	426.643	958.768	-22.6905	-70.4791	-0.313446	-0.973597
72	454.362	504.583	127.909	9.24826	1.76693	0.127755
73	474.332	1280.11	-20.5468	-106.592	-0.283834	-1.47245
74	482.762	1105.39	87.2345	-158.107	1.20506	-2.18409
75	492.896	171.358	54.0569	-6.02013	0.746741	-0.083162
77	493.2	333.616	34.6071	31.6676	0.478061	0.437456
78	491.089	913.707	-57.5812	8.58554	-0.795427	0.1186
80	528.265	729.273	34.6561	6.51828	0.478739	0.0900435
81	542.237	852.768	119.664	-15.057	1.65303	-0.207997
82	560.111	1293.49	34.7478	-63.6343	0.480005	-0.879044
84	545.585	980.651	57.8163	23.7041	0.798673	0.327448
85	532.884	583.582	47.218	-5.11182	0.652269	-0.0706146
86	571.608	509.378	145.581	125.238	2.01105	1.73003
87	571.676	423.605	66.369	-93.6152	0.916821	-1.2932
88	616.544	1064.33	-29.9641	-14.2326	-0.413923	-0.196609
89	546.255	257.797	48.5767	-86.5484	0.671038	-1.19558
91	573.457	1170.31	-111.882	81.4569	-1.54554	1.12525
92	601.66	163.656	74.7944	20.1503	1.03321	0.278356
93	614.107	308.802	40.8854	-78.0126	0.56479	-1.07766
94	617.463	948.855	-89.5316	-54.7154	-1.23679	-0.755838
96	613.713	645.92	43.2689	-58.9883	0.597716	-0.814863
97	655.594	368.863	28.964	-95.7906	0.400109	-1.32325
98	650.522	1251.18	93.3742	-33.1959	1.28987	-0.458567
99	641.351	799.053	122.688	34.724	1.69481	0.479676
100	655.761	72.5437	43.7174	-10.1067	0.603912	-0.139614
101	637.797	1150.71	-39.4518	-68.7649	-0.544987	-0.949918
103	679.077	695.95	48.1852	53.8649	0.66563	0.744089
104	661.259	891.031	282.911	-9.35788	3.90813	-0.12927
105	662.888	1393.75	-28.2267	56.647	-0.389924	0.782522
106	677.468	550.239	11.2425	34.6494	0.155304	0.478646
107	690.442	171.459	75.3025	-20.8634	1.04023	-0.288207
108	697.972	426.4	2.06004	11.9455	0.0284574	0.165015
109	703.631	980.39	-18.6538	-48.1025	-0.257684	-0.664487
110	726.436	1174.54	38.1467	-13.6884	0.526958	-0.189092
111	739.341	247.901	-61.208	-75.1253	-0.845527	-1.03778
112	718.307	1350.02	-20.0241	13.6691	-0.276613	0.188824
114	742.451	872.813	89.0598	-84.0515	1.23027	-1.16109
115	759.286	553.31	28.8908	61.8828	0.399098	0.854848
116	777.208	96.4061	94.0655	-49.0747	1.29942	-0.677918
117	769.251	1280.51	128.534	-213.334	1.77557	-2.94699
118	777.582	346.944	102.542	-41.6044	1.41651	-0.574723
119	809.971	687.305	53.8175	-11.9273	0.743434	-0.164764
120	776.314	1071.86	43.6614	-50.3999	0.603138	-0.696224
121	800.407	806.173	16.7457	16.0079	0.231325	0.221133
122	789.711	439.506	37.5372	-55.1201	0.518538	-0.761428
123	800.425	1369.96	47.4058	-66.6918	0.654863	-0.921279
125	858.451	191.754	69.3109	43.4548	0.95746	0.600284
126	842.625	945.488	124.73	-48.445	1.72301	-0.669219
127	823.259	284.841	-67.2596	-18.1129	-0.929124	-0.250211
128	841.147	1175.99	152.051	-21.9807	2.10043	-0.303641
130	859.652	581.32	98.8201	-64.462	1.3651	-0.890478
131	857.702	1289.37	156.609	-2.07594	2.16339	-0.0286771
132	887.985	422.714	27.0899	13.1387	0.37422	0.181498
133	884.165	81.8019	27.4212	7.6593	0.378796	0.105805
134	886.019	1036.3	13.4524	-11.0156	0.185832	-0.15217
135	925.158	1155.47	-10.3344	-85.7538	-0.142759	-1.1846
136	904.734	792.097	13.0904	-73.6726	0.180831	-1.01771
137	886.193	318.883	14.2687	-59.8021	0.197108	-0.826105
140	926.046	1394.67	-61.485	30.4509	-0.849353	0.420648
141	954.619	524.473	4.57718	-59.9882	0.063229	-0.828677
142	970.541	972.608	98.6644	45.7544	1.36295	0.632051
143	958.85	1276.08	-68.1325	16.3055	-0.941181	0.225244
144	958.488	247.267	81.5828	-7.95587	1.12698	-0.109902
145	970.154	626.747	2.57427	-17.1974	0.0355609	-0.237564
146	979.191	394.795	9.43439	-24.1208	0.130327	-0.333204
147	999.935	121.198	123.603	80.8092	1.70745	1.1163
148	1026.34	1093.05	95.6823	-76.7273	1.32175	-1.05991
149	1009.18	817.524	76.5495	31.1876	1.05745	0.430825
150	1014.28	1357.57	24.8113	56.922	0.342743	0.78632
152	1041	339.825	-8.60271	-61.2574	-0.118838	-0.846209
153	1046.01	493.644	32.0559	-95.6014	0.442819	-1.32064
155	1063.54	1247.42	86.5619	-81.704	1.19577	-1.12866
157	1087.88	716.374	139.849	6.65293	1.93187	0.0919035
158	1093.38	196.69	-3.19584	44.6234	-0.0441474	0.616428
159	1073.2	614.611	-71.4201	19.6899	-0.986597	0.271996
160	1114.37	314.225	-69.2185	-108.727	-0.956183	-1.50195
161	1102.73	976.802	14.3329	19.8638	0.197995	0.274398
162	1147.12	460.995	99.4624	-40.0933	1.37397	-0.553848
163	1143.9	811.293	26.1999	-61.3682	0.361926	-0.84774
164	1149.38	579.027	7.79165	35.4932	0.107634	0.490302
165	1141.24	1377.39	88.6721	3.12943	1.22492	0.0432299
166	1159.21	1229.45	147.448	175.542	2.03685	2.42494
168	1160.62	1100.21	90.2075	-38.0828	1.24613	-0.526075
169	1181.96	903.35	0.0764808	77.2746	0.00105651	1.06747
170	1160	149.568	5.51014	-24.9488	0.076117	-0.344643
171	1196.46	320.08	-31.2363	23.4364	-0.431498	0.32375
172	1199.39	674.438	12.5074	-160.987	0.172777	-2.22387
173	1203.61	95.46	32.9728	-48.9219	0.455486	-0.675807
174	1216.99	1010.77	-23.059	71.9519	-0.318536	0.993943
175	1249.34	761.349	34.8715	-32.6943	0.481714	-0.451639
176	1241.74	1397.21	-51.4132	-15.6194	-0.710221	-0.215766
177	1255.98	1239.69	41.1124	-25.5321	0.567926	-0.3527
178	1264.56	263.379	155.632	52.119	2.14989	0.719972
179	1262.89	176.005	93.4442	46.2235	1.29084	0.638531
181	1260.31	534.206	-22.3443	-37.4864	-0.308664	-0.517836
182	1304.96	427.001	-56.0988	-19.8467	-0.774948	-0.274162
184	1269.65	1289.1	4.14344	63.5582	0.0572374	0.877993
185	1275.87	884.872	-62.2042	20.1822	-0.859288	0.278797
186	1299.31	1089.22	-22.69	60.8999	-0.313439	0.84127
187	1311.99	665.403	122.048	102.094	1.68596	1.41033
189	1274.03	342.033	-12.0147	5.60843	-0.165972	0.0774747
191	1319.89	996.918	36.2311	-5.95815	0.500496	-0.0823058
192	1341.81	910.131	39.3917	-7.45057	0.544156	-0.102922
193	1388.41	817.828	10.0743	-65.8961	0.139166	-0.910288
194	1358.66	1157.8	14.7832	-26.0759	0.204216	-0.360212
195	1394.72	369.21	74.8239	-30.0334	1.03362	-0.414881
196	1385.02	248.684	21.43	79.9114	0.296034	1.10389
197	1395.81	731.742	5.63401	176.901	0.0778281	2.4437
198	1382.87	546.713	16.7169	71.5763	0.230927	0.988754
199	1399.55	134.303	209.082	27.3182	2.88825	0.377373
200	1394.66	1286.66	-49.5855	62.1567	-0.684973	0.858632
201	1421.06	1195.3	-45.5443	-43.2104	-0.629149	-0.596907
204	1410.09	911.327	20.9005	-41.8323	0.28872	-0.577871
206	1418.56	1038.21	48.4042	57.2156	0.668655	0.790376
26	20.9944	493.951	59.3843	40.5342	0.964535	0.658366		0.651233	173.537
27	70.373	85.3503	60.3189	-55.3285	0.979715	-0.89866
28	99.2239	246.583	176.496	25.2249	2.86669	0.40971
29	91.039	477.238	80.2183	-31.6321	1.30293	-0.513777
30	81.5836	733.665	28.0766	-98.2663	0.456028	-1.59607
31	84.0442	1073.77	13.5386	91.6668	0.219897	1.48888
32	86.9099	1491.48	77.5656	10.6064	1.25984	0.172272
34	107.609	159.186	50.9239	-27.1719	0.827118	-0.441332
35	103.517	357.62	27.3446	41.8397	0.444138	0.679571
36	96.4252	1220.82	-70.767	48.453	-1.14942	0.786987
37	126.409	1362.24	46.5785	37.2815	0.75654	0.605535
39	109.702	867.212	71.7725	-3.51113	1.16575	-0.0570287
40	133.345	957.43	-5.45414	18.5612	-0.0885876	0.301476
41	125.508	589.645	-6.9654	8.6389	-0.113134	0.140315
42	165.989	1300.89	24.9564	26.0518	0.405349	0.42314
44	162.946	780.175	23.5097	-41.2859	0.38185	-0.670576
45	154.337	1175.76	-13.6559	0.570025	-0.221802	0.00925849
46	176.846	667.491	97.7907	-57.144	1.58834	-0.928147
47	139.768	1067.61	-9.59012	59.2821	-0.155765	0.962875
49	177.829	118.998	69.6838	-30.2096	1.13182	-0.490673
50	189.872	1030.72	40.8808	76.7754	0.663997	1.24701
51	191.532	1122.63	22.5042	14.5744	0.365519	0.236721
52	174.909	405.641	45.4038	-38.8848	0.737459	-0.631577
53	192.627	1443.65	14.4158	38.8353	0.234145	0.630774
54	168.257	295.274	56.7481	145.33	0.921717	2.36049
55	199.003	534.457	7.52019	-34.9195	0.122145	-0.567171
57	211.466	1254.4	19.6499	34.0453	0.319159	0.552973
58	195.208	897.032	43.0048	39.6898	0.698495	0.644652
59	217.615	257.601	52.213	38.8273	0.848058	0.630643
61	263.449	739.457	40.6402	-15.1136	0.660088	-0.245478
62	258.232	1396.61	-6.659	58.5318	-0.108157	0.950688
63	251.16	410.382	42.9295	-7.71481	0.697272	-0.125306
64	256.584	619.384	115.207	-94.9027	1.87123	-1.54143
65	283.117	985.556	-2.02577	-20.248	-0.0329031	-0.328873
66	263.488	1163.8	-7.31598	47.8017	-0.118828	0.776407
67	284.37	862.635	47.2616	-58.4561	0.767636	-0.94946
68	281.446	215.929	23.9892	41.6482	0.389639	0.676462
69	257.729	506.588	26.7448	2.14869	0.434397	0.0348996
70	275.336	1513.31	90.5533	-9.1568	1.47079	-0.148727
71	279.139	1326.31	-5.55574	5.82879	-0.0902377	0.0946728
72	303.463	1100.46	12.402	46.1546	0.201436	0.749655
74	296.126	1241.7	-40.0648	54.9771	-0.650744	0.892953
75	326.354	145.403	5.0706	-11.8136	0.082358	-0.191879
76	319.22	370.639	33.8076	2.31095	0.549112	0.0375351
78	313.102	528.166	-12.5327	51.9897	-0.203559	0.84443
79	331.084	757.078	52.1732	2.14919	0.84741	0.0349077
80	358.818	616.404	20.6505	37.7159	0.33541	0.612592
81	335.694	1325.47	-30.4889	-71.4582	-0.495209	-1.16064
82	336.187	1466.71	51.1574	12.4644	0.830911	0.20245
83	368.025	1382.68	-28.9062	-3.61669	-0.469502	-0.0587432
84	358.72	1230.17	-29.1777	12.3402	-0.473912	0.200433
86	354.005	1047.31	-67.5927	-3.55828	-1.09786	-0.0577946
87	373.612	505.304	5.03055	-66.4916	0.0817076	-1.07997
88	375.72	941.019	-20.534	-54.926	-0.333518	-0.892123
89	374.359	1157.56	-22.0127	-6.85545	-0.357536	-0.111348
90	389.283	695.406	58.1126	37.815	0.943879	0.614201
91	365.71	291.515	-59.4904	53.3859	-0.966259	0.867107
93	387.755	804.434	96.6539	64.301	1.56988	1.04439
94	404.883	440.791	5.73477	18.4098	0.0931457	0.299017
96	413.198	1322.96	52.1714	94.6654	0.847382	1.53758
97	409.683	260.389	-12.3131	40.374	-0.199993	0.655765
98	399.453	1435.2	71.1586	49.6897	1.15578	0.807072
99	422.683	372.226	64.3024	-3.06411	1.04442	-0.049768
100	420.444	82.7556	-0.0433197	-17.6372	-0.000703609	-0.286468
101	410.272	1071.86	29.0511	-54.525	0.471855	-0.885609
102	440.297	182.752	53.3762	-49.0314	0.86695	-0.796381
103	451.07	928.002	63.2246	-27.5487	1.02691	-0.447453
104	440.625	1169.05	-6.67298	-22.5454	-0.108384	-0.366188
105	469.645	1252.87	167.288	-9.34419	2.71713	-0.151771
106	443.679	625.172	24.4351	86.0016	0.396882	1.39686
107	452.853	1479.08	15.5812	102.765	0.253074	1.66913
108	473.478	1064.76	21.8885	15.4407	0.355518	0.250792
109	491.549	567.372	-13.0217	84.359	-0.211502	1.37018
110	470.009	834.809	120.436	113.338	1.95616	1.84086
113	488.204	732.82	109.868	177.543	1.78451	2.8837
114	460.623	263.524	-12.1521	-79.9524	-0.197378	-1.29861
115	501.172	1365.94	112.463	-32.7096	1.82665	-0.531278
116	494.338	128.162	11.4096	-10.8786	0.185318	-0.176693
117	504.243	485.462	93.3847	13.9915	1.51678	0.227254
118	485.234	300.938	-6.46833	-78.8111	-0.10506	-1.28007
119	506.073	387.273	26.8803	-78.6581	0.436598	-1.27758
120	514.057	1459.23	-31.4868	-99.2935	-0.511417	-1.61275
123	527.065	1148.12	-56.2117	-67.7543	-0.913005	-1.10048
124	516.509	653.5	86.939	19.0834	1.41209	0.309957
125	536.827	992.625	23.13	69.0915	0.375683	1.1222
126	497.429	984.929	-116.512	-65.5172	-1.89242	-1.06415
127	568.975	206.046	18.2757	-19.3379	0.296838	-0.314091
128	542.256	331.186	14.412	4.88833	0.234083	0.0793975
129	565.5	1240.3	119.239	-61.4749	1.93671	-0.998492
130	566.763	897.66	107.493	83.9567	1.74592	1.36365
131	534.151	179.387	-65.7043	-41.0052	-1.06719	-0.666017
132	568.484	1096.72	172.758	-78.3402	2.80598	-1.27242
133	557.823	754.6	125.465	38.0854	2.03784	0.618593
134	578.298	506.191	100.096	83.8936	1.62578	1.36262
135	569.412	120.235	43.6759	-17.9623	0.709395	-0.291748
136	584.858	658.227	36.8679	90.6413	0.598817	1.47222
137	587.876	254.838	90.0141	-118.759	1.46203	-1.92891
138	600.706	1324.63	127.751	-17.1112	2.07497	-0.277924
139	586.899	1412.44	72.7041	27.0019	1.18088	0.438572
141	556.92	168.48	59.5882	-61.4097	0.967847	-0.997432
143	606.899	336.943	78.2339	3.7335	1.2707	0.0606404
144	608.169	428.8	13.3059	-27.4289	0.216118	-0.445507
145	608.709	820.181	-19.7782	61.3992	-0.321243	0.997262
146	618.011	1070.11	157.662	-46.4196	2.56078	-0.753959
147	633.393	119.556	42.0924	67.8965	0.683676	1.10279
149	611.668	608.033	13.5034	22.5043	0.219325	0.365521
150	645.331	1442	26.3742	-14.4255	0.428377	-0.234303
151	653.984	987.025	12.6929	25.1711	0.206161	0.408835
152	664.355	751.303	51.071	-53.8398	0.829509	-0.87448
153	649.808	1220.65	68.9392	30.7013	1.11973	0.498659
154	660.047	506.414	64.3021	24.4553	1.04441	0.39721
155	660.081	231.981	160.06	6.70273	2.59974	0.108867
156	662.07	865.824	-7.22156	20.7424	-0.117294	0.336904
157	692.678	630.579	18.3865	-117.334	0.298638	-1.90577
158	669.079	1542.31	121.757	-53.0991	1.97761	-0.86245
159	669.968	318.505	-4.87139	-74.4763	-0.0791223	-1.20966
160	679.177	1339.04	15.8864	46.1246	0.25803	0.749168
162	697.739	706.551	-28.9829	-18.2731	-0.470748	-0.296797
163	705.911	419.686	48.3888	20.4142	0.785943	0.331573
164	701.252	1097.16	74.1933	18.0101	1.20507	0.292524
166	704.708	1186.02	11.6329	55.6036	0.188944	0.903128
167	701.69	1470.98	-32.5232	63.2138	-0.528251	1.02674
168	723.535	959.961	120.826	5.98183	1.96248	0.0971585
169	706.744	73.0759	0.0905154	-12.7796	0.00147018	-0.207569
170	728.642	180.44	11.5975	70.8242	0.188369	1.15035
171	721.505	314.481	-11.6221	18.2737	-0.188769	0.296805
172	749.037	569.508	10.8342	-48.7196	0.175972	-0.791316
174	736.469	859.688	84.458	-6.04407	1.37179	-0.0981694
175	753.166	1236.45	93.7278	-43.2263	1.52235	-0.702093
176	732.846	1328.85	22.7048	-63.8436	0.368778	-1.03696
178	753.088	1431.42	-24.0084	14.5096	-0.38995	0.235669
179	763.035	1055.39	94.3925	21.699	1.53315	0.352441
180	781.916	262.188	84.9313	-26.4612	1.37948	-0.42979
181	784.282	742.499	104.162	-90.7774	1.69182	-1.47443
182	789.211	493.19	34.3728	-44.6998	0.558293	-0.726025
183	788.206	647.346	124.129	50.6213	2.01613	0.822204
184	784.797	355.716	34.0572	14.1715	0.553166	0.230177
185	819.11	1295.67	130.921	-82.1283	2.12645	-1.33395
186	820.399	838.167	154.454	-0.400224	2.50869	-0.00650055
187	803.202	152.935	64.7695	15.1579	1.052	0.246199
188	813.085	1158.71	-15.8158	25.0048	-0.256884	0.406134
189	815.241	971.376	152.914	27.2178	2.48367	0.442078
190	801.18	1446.75	-58.0541	19.471	-0.94293	0.316253
191	849.686	465.303	110.663	6.65324	1.79742	0.108064
192	860.575	261.485	58.5467	48.8359	0.950931	0.793206
193	830.262	87.248	77.6908	-26.1789	1.26187	-0.425204
195	832.847	1369.9	102.676	98.5967	1.6677	1.60143
196	853.153	1487.07	63.3177	76.6601	1.02842	1.24513
198	869.825	364.186	181.927	-46.4867	2.9549	-0.755049
199	867.321	746.251	16.0405	-9.03188	0.260534	-0.146698
200	858.768	1105.26	113.646	-47.7471	1.84587	-0.77552
201	878.103	683.765	65.4004	28.5201	1.06225	0.463231
202	858.255	589.838	141.398	51.3649	2.29663	0.834283
203	893.462	1283.33	96.4105	-8.40149	1.56592	-0.136459
204	887.379	187.453	88.0975	9.9642	1.4309	0.161841
205	870.628	953.071	205.282	-33.7101	3.33424	-0.547528
206	909.878	80.3363	127.539	-127.052	2.07152	-2.0636
207	911.621	858.709	103.533	16.8442	1.6816	0.273587
208	914.787	1395.87	129.643	85.7785	2.1057	1.39324
209	929.68	1241.88	-18.6947	80.7297	-0.303644	1.31123
211	925.575	978.362	-0.858927	80.1447	-0.0139509	1.30173
212	918.508	1098.47	135.426	5.23298	2.19962	0.0849954
214	935.14	531.813	-63.2515	61.1684	-1.02735	0.993513
215	938.956	459.099	13.4608	44.7262	0.218634	0.726455
216	951.426	705.887	6.36111	-93.819	0.103319	-1.52383
217	965.859	618.655	11.1073	88.9644	0.180407	1.44498
218	956.441	351.275	59.8073	38.8021	0.971405	0.630234
219	968.258	202.758	11.8697	31.3012	0.19279	0.508402
220	982.003	1200.08	-43.4581	61.9018	-0.705858	1.00542
222	977.86	1034.85	12.4308	17.8866	0.201904	0.290519
223	976.211	813.971	-2.46098	-58.5256	-0.0399719	-0.950588
224	985.385	1486.86	65.5486	-15.293	1.06466	-0.248394
226	1025.63	1406.01	76.2779	89.8421	1.23893	1.45924
227	1001.09	1127.63	43.266	18.1713	0.702737	0.295143
228	1009.23	899.796	8.76584	-6.24512	0.142377	-0.101435
229	1029.81	491.421	51.0755	13.2776	0.829581	0.215658
230	1038.31	1298.09	116.974	51.0477	1.89993	0.829129
231	1034.14	251.351	73.0199	12.0218	1.18601	0.195261
232	1045.41	411.683	42.7331	69.7164	0.694082	1.13235
233	1038.48	131.959	-28.29	53.3338	-0.459494	0.866262
234	1042.25	778.196	7.7716	50.2332	0.126228	0.815901
235	1051.1	1039.08	45.8211	18.8411	0.744239	0.306022
236	1030.7	658.399	-6.45419	-12.7865	-0.104831	-0.207681
237	1045.17	340.358	101.371	-48.5064	1.6465	-0.787853
238	1054.23	952.346	33.9327	-51.1056	0.551144	-0.83007
240	1057.34	577.412	170.107	-104.54	2.76293	-1.69797
241	1050.13	1544.3	8.09585	13.2699	0.131495	0.215534
242	1070.21	1166.12	-22.3822	29.7556	-0.363538	0.483299
243	1041.66	1488.56	-10.4199	-87.4095	-0.169242	-1.41973
244	1102.73	883.009	59.3436	32.1788	0.963874	0.522656
247	1094.06	692.989	59.4634	-56.5885	0.96582	-0.919125
248	1110.16	1401.52	34.3567	-63.5713	0.55803	-1.03254
249	1108.4	206.103	103.599	68.601	1.68268	1.11423
251	1104.31	1502.52	47.6408	35.3533	0.773794	0.574217
252	1102.73	1256.54	6.16924	25.1567	0.100202	0.408601
253	1114.89	343.598	4.75072	16.3628	0.0771624	0.265768
254	1137.41	825.907	115.96	143.059	1.88345	2.3236
255	1115.82	1133.08	58.4324	89.1505	0.949074	1.448
256	1143.77	486.674	53.4576	111.651	0.868273	1.81347
257	1109.1	964.71	-51.2946	-64.603	-0.83314	-1.0493
258	1133.16	595.772	138.728	89.0039	2.25326	1.44562
259	1144.32	1335.95	18.2878	47.8143	0.297036	0.776612
260	1153.13	1012.46	-34.3439	-20.8167	-0.557823	-0.33811
261	1159.51	1096.67	-53.2195	78.9606	-0.864405	1.2825
263	1147.43	752.988	61.517	16.8652	0.999175	0.273929
264	1197.5	1453.72	-14.1233	2.3335	-0.229394	0.0379014
265	1190.15	1251.77	100.219	78.5989	1.62779	1.27662
266	1173.52	319.756	20.6342	57.2312	0.335147	0.929565
267	1178.53	1187.55	-10.0255	-41.0625	-0.162837	-0.666947
269	1184.24	199.436	37.4403	-2.64767	0.608116	-0.0430041
270	1192.07	703.419	101.274	32.84	1.64491	0.533395
271	1191.57	920.281	-66.571	89.7728	-1.08126	1.45811
272	1190.95	60.4536	-10.2461	-6.4258	-0.16642	-0.10437
273	1199.69	437.711	-69.6935	38.5372	-1.13198	0.625932
274	1221.36	562.82	22.6585	-110.213	0.368025	-1.79011
275	1212.12	1355.22	30.6705	34.5434	0.498158	0.561063
276	1231.98	791.072	74.5063	-40.6913	1.21015	-0.660918
277	1220.64	1022.57	-28.5334	76.5413	-0.463446	1.2432
278	1242.47	872.915	50.7133	3.02804	0.823699	0.0491822
280	1239.83	1139.96	74.7317	44.6213	1.21381	0.724751
281	1234.5	385.254	76.8231	54.0706	1.24778	0.878229
283	1259.83	694.076	115.886	-116.881	1.88226	-1.89842
284	1251.44	271.312	-89.8843	-8.41968	-1.45992	-0.136755
286	1270.47	197.543	41.3235	-35.785	0.671186	-0.58123
287	1261.36	960.808	37.0662	84.7491	0.602039	1.37652
288	1253.72	1524.56	-6.00323	-9.89047	-0.097506	-0.160644
289	1280.84	1367.73	-8.15009	-93.6985	-0.132376	-1.52188
290	1296.77	1246.33	172.928	3.09449	2.80875	0.0502615
291	1294.94	394.568	-26.672	13.6479	-0.433214	0.221673
292	1265.35	610.219	-3.23524	-20.2665	-0.0525476	-0.329173
294	1310.88	521.493	48.03	146.921	0.780116	2.38632
295	1306.74	1106.15	2.67394	32.2966	0.0434309	0.52457
296	1317.33	665.829	213.49	15.123	3.46756	0.245632
297	1314.88	1513.62	33.3435	14.6831	0.541574	0.238487
298	1322.02	805.88	-23.2797	25.6904	-0.378115	0.417269
300	1326.04	176.592	29.0023	21.3438	0.471063	0.346671
301	1323.41	964.855	-4.31773	10.566	-0.0701297	0.171616
302	1350.54	341.625	6.43846	-2.76376	0.104575	-0.0448897
303	1349.9	1416.36	2.08769	-29.6573	0.0339088	-0.481702
304	1369.22	123.069	-13.9884	0.861561	-0.227204	0.0139937
305	1381.83	1507.91	94.9513	-35.6332	1.54222	-0.578763
306	1363.92	870.176	-18.0188	80.302	-0.292666	1.30429
307	1384.53	1329.36	78.1835	69.3829	1.26988	1.12694
308	1362.15	577.234	13.1286	9.28707	0.213239	0.150843
309	1381.94	1150.25	95.5141	-20.5581	1.55137	-0.33391
310	1390.48	1056.13	144.127	112.595	2.34094	1.8288
313	1384.46	1244.46	110.044	91.6295	1.78736	1.48827
314	1414.32	286.012	22.223	31.3776	0.360952	0.509642
315	1395.28	464.906	-59.9306	4.90626	-0.973408	0.0796888
316	1410.22	959.549	-6.92876	54.7835	-0.112539	0.889808
317	1396.98	673.298	195.86	-23.6021	3.18122	-0.383351
318	1425.73	789.918	80.8245	14.8299	1.31277	0.240871
319	1442.99	555.707	18.5453	49.3909	0.301218	0.80222
321	1458.98	1407.06	39.212	42.5399	0.636892	0.690945
322	1462.66	887.27	63.7615	-64.1954	1.03563	-1.04268
323	1441.21	1243.23	-103.947	-62.0937	-1.68834	-1.00854
324	1465.14	187.578	-50.3701	-41.7427	-0.818124	-0.677996
325	1453.18	1068.17	41.6041	106.546	0.675744	1.73056
326	1461.79	1525.5	-37.9952	25.211	-0.617127	0.409484
329	1498.98	462.638	69.0003	19.185	1.12072	0.311607
330	1503.68	375.057	2.75418	-108.746	0.044734	-1.76627
331	1489.64	678.901	40.4091	23.5219	0.656336	0.382049
332	1483.2	1194.83	10.3598	-116.944	0.168267	-1.89944
333	1444.07	1344.47	45.6856	4.66965	0.742037	0.0758456
334	1518.26	1015.65	60.7266	-22.1803	0.986338	-0.360258
335	1524.61	1306.59	19.5345	84.0311	0.317284	1.36485
336	1496.78	279.57	26.9374	76.4766	0.437524	1.24215
337	1511.35	1125.93	5.46588	25.2124	0.0887782	0.409507
339	1535.99	570.294	-0.315126	-16.687	-0.00511836	-0.271034
340	1543.02	835.198	-21.3466	-0.580551	-0.346717	-0.00942946
341	1517.14	1509.52	0.834712	74.7448	0.0135576	1.21402
343	1528.21	1440.38	14.2977	-47.631	0.232228	-0.773635
27	56.9562	1335.42	49.1811	-12.3246	0.620045	-0.155381		0.455775	170.57
28	64.8582	1053.4	100.773	-24.1183	1.27049	-0.304069
29	46.0087	197.867	49.428	59.5001	0.623157	0.75014
30	56.8341	121.471	6.21517	4.70331	0.078357	0.0592964
32	58.3072	1146	-25.6392	43.0412	-0.323243	0.542637
34	82.1062	527.9	56.8405	20.9282	0.71661	0.26385
35	74.2251	436.229	37.3655	52.8779	0.471082	0.666652
36	89.0632	351.862	55.8037	-43.9825	0.703538	-0.554504
37	89.3429	617.771	121.678	-14.4008	1.53405	-0.181556
38	94.5484	728.764	64.1396	74.1892	0.808632	0.935332
39	100.077	150.531	10.8087	-59.6711	0.136269	-0.752296
40	97.5894	1556.13	51.0139	-72.8853	0.643152	-0.918893
42	94.9749	1425.46	72.9608	54.3813	0.919845	0.685606
43	131.608	1180.76	140.181	87.4998	1.76732	1.10314
44	125.248	1282.2	123.882	96.3028	1.56182	1.21413
46	87.2034	220.154	-65.9023	49.6234	-0.830855	0.625621
47	118.525	915.565	18.6127	-88.543	0.234658	-1.1163
50	123.363	242.091	-63.6565	-66.6605	-0.802541	-0.840414
51	133.219	463.234	-68.13	21.3324	-0.858941	0.268946
52	140.987	1100.31	75.8456	2.74652	0.956214	0.0346264
53	162.564	1010.96	55.3534	75.9431	0.697861	0.957443
54	151.276	1357.36	-58.6594	7.28129	-0.739541	0.091798
55	170.239	282.888	69.6327	39.7427	0.877885	0.501052
56	177.262	887.234	39.561	55.0245	0.498761	0.693715
57	182.11	1514.76	137.948	10.9902	1.73916	0.138558
58	164.278	168.798	-22.7718	28.6816	-0.287092	0.3616
59	173.551	781.392	155.246	11.2849	1.95724	0.142273
60	173.071	592.517	26.9383	-9.20761	0.339622	-0.116084
61	155.484	365.294	27.2589	-62.072	0.343663	-0.782565
62	178.239	1416.88	73.7333	21.5707	0.929583	0.27195
63	174.187	685.587	0.354864	18.7488	0.00447391	0.236373
64	174.605	515.051	-0.586886	54.5837	-0.0073991	0.688157
65	175.24	90.9388	47.5141	38.1113	0.599029	0.480483
67	209.653	440.446	0.936861	27.3659	0.0118114	0.345013
69	208.44	1607.18	43.6615	111.837	0.550457	1.40997
70	237.871	1200.43	148.527	-15.2292	1.87254	-0.192001
71	227.374	1312.68	-28.2231	36.2444	-0.355819	0.456946
72	212.138	216.311	-4.71409	12.8232	-0.0594323	0.161667
73	226.585	1073.31	115.387	82.2416	1.45473	1.03685
74	233.112	317.59	53.7011	-3.09226	0.677031	-0.0389853
75	217.934	1144.38	29.531	2.01413	0.372309	0.0253929
76	259.037	555.443	-65.4813	24.1391	-0.825548	0.304331
77	234.309	112.753	89.749	-64.8778	1.1315	-0.817939
78	246.851	661.884	-42.0788	17.7671	-0.530503	0.223996
80	240.846	855.377	31.9085	36.8898	0.402282	0.465084
81	259.73	1266.51	204.858	-94.4878	2.58273	-1.19124
82	248.746	1549.16	62.6837	60.2225	0.790277	0.759247
83	250.214	952.805	-39.0866	17.6246	-0.49278	0.222199
84	249.599	1438.26	-85.5866	1.8221	-1.07902	0.0229719
85	260.619	192.511	-28.2383	29.8761	-0.356011	0.37666
86	269.2	764.978	67.7413	25.6946	0.85404	0.323942
87	269.325	1641.01	120.565	95.4013	1.52001	1.20276
88	276.965	394.098	94.4076	0.305917	1.19023	0.00385681
89	321.502	511.352	14.1117	68.5734	0.177912	0.864531
92	321.69	1405.69	25.022	78.8911	0.315462	0.99461
93	300.187	1539.23	-3.93682	70.0875	-0.049633	0.88362
94	311.654	1082.06	148.084	-9.81291	1.86695	-0.123715
95	319.493	658.601	58.4259	-69.9561	0.736598	-0.881963
96	314.522	293.52	-24.7187	-3.85833	-0.311639	-0.0486435
97	300.564	109.029	118.598	-6.31609	1.49521	-0.0796294
98	329.6	825.776	66.1038	-19.0545	0.833395	-0.240228
99	326.977	975.981	48.0996	-5.65483	0.60641	-0.0712926
100	313.398	172.217	18.676	70.2471	0.235455	0.885631
101	336.135	1176.56	110.167	-101.78	1.38891	-1.28318
102	315.766	1285.18	17.118	139.443	0.215814	1.75802
103	358.05	904.487	42.2254	-45.548	0.532352	-0.574242
105	374.463	451.065	27.4801	-18.8443	0.346452	-0.237577
106	389.43	352.84	70.2893	-21.7117	0.886164	-0.273727
107	377.101	1583.71	89.1191	-41.6525	1.12356	-0.525129
108	364.501	1493.91	-73.7452	3.11578	-0.929734	0.0392819
109	385.674	180.261	-96.6412	-24.0516	-1.21839	-0.303228
110	362.058	1251.17	-21.8092	-27.095	-0.274957	-0.341596
111	373.734	98.7995	-7.20521	5.99252	-0.0908388	0.0755499
112	395.241	261.812	-62.2209	74.8914	-0.784443	0.944185
114	394.582	782.314	-71.4019	-18.4914	-0.900191	-0.233129
115	385.02	665.467	80.0311	73.2794	1.00898	0.923861
116	405.944	1276.96	1.95511	-23.4896	0.0246489	-0.296143
117	394.24	1055.32	59.283	-47.5155	0.747403	-0.599046
118	404.809	1372.02	25.5279	-102.622	0.321841	-1.2938
119	414.504	596.984	-39.9149	100.967	-0.503222	1.27293
120	410.568	1166.88	79.4664	37.053	1.00186	0.467141
122	424.524	956.505	-29.9409	-74.6566	-0.377476	-0.941224
123	457.935	398.214	9.3004	-40.6229	0.117254	-0.512148
124	423.536	1445.66	32.235	88.7536	0.406399	1.11895
125	439.62	1527.11	24.3966	-22.2589	0.307577	-0.280626
126	459.23	887.02	96.7806	78.8884	1.22015	0.994576
127	477.559	465.919	59.401	5.43787	0.748891	0.0685573
128	466.425	1331.91	-10.4121	-9.04236	-0.13127	-0.114
130	467.677	298.105	37.9505	-127.661	0.478456	-1.60947
131	465.633	718.565	66.6526	96.816	0.840314	1.2206
133	473.094	572.291	16.0503	-65.4821	0.202352	-0.825557
134	480.579	208.056	7.00875	21.8121	0.088362	0.274994
135	465.645	1148.03	57.4884	11.5034	0.724778	0.145028
136	473.186	1035.54	-2.94736	-75.7884	-0.0371585	-0.955494
137	484.811	1593.33	88.1727	31.318	1.11163	0.394838
138	475.984	820.533	-39.37	-70.586	-0.496353	-0.889904
139	484.077	1467.45	20.891	46.4302	0.263381	0.585363
140	515.481	115.868	56.2999	34.1226	0.709794	0.430196
142	509.028	340.535	-23.7298	-84.0185	-0.29917	-1.05925
143	521.353	1284.42	113.298	-0.798839	1.42839	-0.0100713
144	542.734	979.491	40.0006	22.1537	0.504303	0.279301
145	544.803	41.5632	113.452	18.6028	1.43033	0.234532
146	540.752	783.7	93.9733	-22.8799	1.18476	-0.288455
147	532.084	1136.42	8.25059	62.7508	0.104018	0.791123
148	546.088	915.274	97.6708	57.4744	1.23137	0.724601
149	566.39	515.922	15.5065	68.0852	0.195496	0.858375
150	524.898	665.276	30.7539	-19.8971	0.387726	-0.250851
151	559.212	609.024	-18.732	109.412	-0.236161	1.3794
153	580.844	1403.92	33.9633	73.0061	0.428188	0.920415
154	536.872	1566.73	-74.5689	-23.4864	-0.940119	-0.296102
155	541.804	1466.14	-33.0741	6.39529	-0.416978	0.0806279
156	561.783	402.389	8.83667	-50.6289	0.111407	-0.638298
157	561.364	279.367	-15.6505	-67.7133	-0.197312	-0.853688
158	595.434	1024.4	46.6323	-36.0468	0.587911	-0.454456
159	553.18	1351.93	-53.8818	-123.75	-0.679309	-1.56016
160	593.837	121.316	94.1742	-41.2768	1.18729	-0.520392
161	579.714	1607.87	119.586	-56.513	1.50767	-0.712481
162	585.797	712.099	-77.3319	-88.5305	-0.974953	-1.11614
163	573.3	1205.87	-13.4954	163.265	-0.170142	2.05834
164	618.722	1490.53	2.72458	-32.289	0.0343498	-0.40708
165	588.6	1307.63	5.44144	63.9212	0.0686024	0.805879
166	584.101	830.917	-31.2816	-1.04062	-0.394379	-0.0131195
168	595.387	1125.56	29.5818	-65.5276	0.372949	-0.826131
169	629.54	879.231	49.0391	64.5648	0.618255	0.813993
170	631.851	219.631	54.3933	-27.4182	0.685757	-0.345671
171	647.678	1566.8	-3.75549	-79.1381	-0.0473469	-0.997724
172	623.007	665.548	44.8278	-68.0597	0.565161	-0.858055
174	628.106	1203.44	-5.55624	-45.4774	-0.0700497	-0.573351
175	639.85	322.958	160.032	4.13213	2.01758	0.0520953
176	630.561	409.127	18.2394	112.769	0.229951	1.42172
178	658.896	539.862	76.6167	-24.1236	0.965935	-0.304135
179	649.521	1108.91	99.0668	50.7475	1.24897	0.639793
180	644.873	803.107	28.976	105.929	0.365311	1.33548
181	649.899	600.953	23.2263	-83.3857	0.292822	-1.05128
182	664.101	1274.89	0.409183	-40.1468	0.00515873	-0.506146
183	638.685	1382.18	40.2595	2.19714	0.507567	0.0277002
184	692.746	909.859	33.8001	99.2604	0.426131	1.25141
185	669.848	74.0909	44.9983	6.23613	0.567311	0.0786213
186	682.257	755.014	-40.7631	62.3606	-0.513916	0.786204
187	664.547	1006.14	135.333	-21.5864	1.7062	-0.272148
188	700.387	445.645	35.3443	70.5927	0.445599	0.889989
189	709.635	1456.85	1.08123	23.6703	0.0136315	0.29842
190	703.184	1342.53	19.2757	-10.6154	0.243016	-0.133833
191	701.843	139.55	100.931	-15.7176	1.27248	-0.198158
193	705.384	633.372	71.4058	88.8702	0.900241	1.12042
195	712.728	1150.99	214.66	-12.3276	2.7063	-0.155419
196	745.172	1543.32	104.163	0.0951151	1.31322	0.00119915
197	728.51	291.26	74.8552	-148.352	0.943728	-1.87034
198	712.517	210.146	-16.1128	-18.8353	-0.20314	-0.237463
199	735.504	1049.17	-22.4866	39.7348	-0.283497	0.500951
201	773.465	1415.76	67.6203	53.316	0.852515	0.672176
202	766.818	501.746	130.711	15.4168	1.64793	0.194366
203	753.845	686.99	-49.8535	28.9339	-0.628522	0.364781
204	779.652	756.464	33.7042	70.945	0.424922	0.894431
205	759.051	1225.98	-0.660078	62.203	-0.00832186	0.784217
206	730.249	1258.9	16.6228	4.91074	0.20957	0.0619116
207	771.788	351.153	-77.6045	-96.2492	-0.97839	-1.21345
209	819.431	1011.07	39.8065	-29.6649	0.501856	-0.373997
210	764.087	913.814	8.59078	1.76607	0.108307	0.0222656
211	778.725	187.738	23.341	135.942	0.294269	1.71388
213	783.491	417.584	37.4155	82.0221	0.471712	1.03408
214	804.168	1320.22	-44.1429	94.6589	-0.556526	1.1934
215	803.818	554.328	8.17627	-28.7179	0.103081	-0.362057
216	800.269	1619.71	81.8617	-21.1478	1.03206	-0.266618
217	801.949	1155.51	163.107	48.3032	2.05635	0.608977
218	811.779	117.214	14.6107	71.7321	0.184202	0.904354
219	821.308	808.357	-31.1763	10.6579	-0.393051	0.134368
220	826.423	935.057	-16.9349	34.7171	-0.213505	0.437692
221	835.506	605.054	38.1682	-46.9753	0.481201	-0.592235
222	834.912	312.589	98.1745	102.521	1.23772	1.29252
223	838.39	1531.11	127.121	-26.9953	1.60266	-0.34034
225	853.645	1445.56	23.0978	53.6515	0.291203	0.676404
226	851.945	1282.75	9.32881	7.76699	0.117612	0.0979214
227	871.669	179.464	95.1509	27.3961	1.1996	0.345394
228	878.524	414.82	29.5322	-28.3859	0.372324	-0.357872
229	874.033	485.218	-4.07742	34.1717	-0.0514056	0.430815
230	886.796	261.685	-26.1295	-2.77644	-0.329425	-0.0350036
231	867.713	691.776	12.8161	-1.18862	0.161578	-0.0149854
232	864.744	1123.97	10.9488	51.6011	0.138036	0.650554
234	877.432	1608.47	66.7245	26.0453	0.841221	0.328362
235	894.071	850.177	87.5101	-89.7431	1.10327	-1.13142
236	902.841	927.234	122.917	14.5496	1.54966	0.183432
237	890.695	89.4385	118.927	11.1878	1.49936	0.141049
238	899.056	1400.05	73.4974	38.5934	0.92661	0.486561
239	902.225	1239.33	-9.23697	23.4145	-0.116454	0.295195
240	902.072	786.452	-8.11549	1.89832	-0.102315	0.0239329
241	900.344	573.823	101.101	-34.6143	1.27462	-0.436396
243	938.67	1304.33	195.059	19.1592	2.45919	0.241547
244	920.846	1517.57	87.581	29.6279	1.10417	0.373531
245	927.668	332.145	58.0801	-40.5567	0.732238	-0.511313
246	916.454	1159	65.2988	73.4912	0.823247	0.926532
248	935.87	1036.73	10.8098	23.4547	0.136284	0.295702
249	931.74	397.381	144.098	-79.21	1.8167	-0.99863
251	944.1	693.375	79.3228	92.016	1.00005	1.16008
252	923.423	1087.38	-37.2847	2.13639	-0.470062	0.0269343
253	943.105	168.444	41.0902	-89.878	0.51804	-1.13313
254	985.771	1469.16	21.1166	-17.8599	0.266225	-0.225167
255	954.246	561.887	86.0858	68.0974	1.08532	0.85853
256	957.418	1574.42	11.9535	0.0886719	0.150703	0.00111792
257	960.979	1386.59	52.2854	-47.4288	0.659182	-0.597952
258	986.753	79.8802	63.1572	-27.2483	0.796247	-0.34353
259	980.7	288.275	-52.4902	39.5993	-0.661764	0.499243
260	990.856	486.472	60.9848	79.5209	0.768859	1.00255
261	986.08	962.161	-4.14454	145.283	-0.0522518	1.83164
262	959.782	785.471	-5.07512	39.6548	-0.063984	0.499944
264	970.752	1174.15	10.6563	18.6364	0.134348	0.234956
265	1013.11	225.798	2.23692	-33.4116	0.0282017	-0.421233
266	990.578	394.799	73.6096	-10.0578	0.928024	-0.126803
267	997.325	637.381	15.8373	114.882	0.199667	1.44836
268	1005.76	851.973	32.6363	-19.4811	0.411458	-0.245605
269	1017.66	1123.52	91.9845	22.6102	1.15968	0.285055
270	1035.96	773.915	-76.5286	171.709	-0.964825	2.1648
272	1013.8	1322.57	176.717	157.749	2.22794	1.9888
273	1023.35	1563.89	50.9273	98.3879	0.64206	1.24041
274	1040.91	156.637	64.2147	84.1154	0.809579	1.06047
275	1055.18	532.626	-14.6927	-98.9396	-0.185236	-1.24737
277	1044.84	1226.4	56.4379	29.7688	0.711533	0.375307
278	1068.94	1089.22	-15.8443	-40.5715	-0.199755	-0.5115
279	1062.27	673.073	151.438	-55.5183	1.90923	-0.69994
280	1068.67	1452.15	45.6287	-54.0319	0.575259	-0.6812
281	1048.89	401.568	-11.876	19.6405	-0.149725	0.247615
282	1074.65	74.7201	40.6269	-59.3345	0.512199	-0.748053
284	1056.84	328.192	-18.9973	12.3409	-0.239506	0.155586
285	1054.01	893.459	2.86592	-88.5531	0.0361318	-1.11642
286	1062.69	959.749	85.8264	-24.9857	1.08205	-0.315004
287	1074.55	1325.24	160.587	26.5931	2.02458	0.335269
288	1078.05	617.222	-74.4963	155.563	-0.939203	1.96124
289	1082.75	1595.61	-9.5036	32.3699	-0.119816	0.4081
290	1085.08	273.795	-35.0679	95.8169	-0.442114	1.208
291	1097.79	737.357	20.528	-74.4502	0.258804	-0.938622
293	1127.01	810.636	34.5463	-60.2196	0.435539	-0.759212
294	1114.88	444.056	72.7975	-101.41	0.917785	-1.27852
295	1121.97	1045.27	0.435769	-5.59843	0.0054939	-0.0705815
296	1116.61	188.423	-12.6381	-6.98861	-0.159334	-0.0881081
297	1139.6	877.766	-89.2866	151.609	-1.12567	1.91139
298	1106.89	1228.92	80.8217	15.9171	1.01895	0.200673
299	1135.72	1590.24	53.1568	-1.58493	0.670168	-0.0199818
300	1115.85	583.784	-0.0197616	2.29503	-0.000249142	0.0289343
301	1135.75	1413.04	90.8643	-117.061	1.14556	-1.47583
302	1149.99	1325.77	72.1448	-40.4669	0.909557	-0.510182
303	1166.65	1225.79	5.80355	77.0591	0.0731675	0.971513
304	1150.58	269.271	-15.1982	94.3255	-0.19161	1.1892
305	1142.01	337.97	78.2507	126.716	0.986536	1.59756
306	1170.06	719.069	30.6291	103.499	0.386153	1.30485
307	1154.77	58.0614	-28.5842	23.2768	-0.360371	0.293459
308	1203.39	893.611	13.2863	98.0232	0.167506	1.23582
309	1185.8	145.243	18.6625	69.5636	0.235285	0.877015
310	1162.97	539.139	-24.2263	1.93185	-0.30543	0.0243556
312	1174.49	636.299	-7.52781	4.97465	-0.094906	0.0627173
314	1200.05	1480.65	51.651	86.8789	0.651183	1.09531
315	1175.86	428.861	20.4858	-17.0299	0.258272	-0.214702
316	1190.93	1558.15	25.1833	-5.32084	0.317495	-0.0670818
317	1183.79	1027.51	26.9203	39.2855	0.339394	0.495287
318	1210.75	1160.14	147.759	76.8552	1.86286	0.968943
319	1193.9	252.494	1.19509	-0.450295	0.015067	-0.00567704
320	1226	211.159	-48.7251	0.811969	-0.614296	0.0102368
321	1229.42	95.8908	39.7388	55.5623	0.501002	0.700495
322	1227.25	1384.22	161.275	-44.7192	2.03326	-0.563792
323	1220.13	365.085	62.1839	59.3427	0.783976	0.748156
324	1246.67	625.708	61.15	65.8396	0.770942	0.830065
325	1247.46	1002.89	-75.5358	24.263	-0.952308	0.305893
326	1242.72	527.359	72.5939	19.587	0.915219	0.246941
328	1250.66	1287.5	33.4033	65.3852	0.421128	0.824336
329	1253.39	289.487	45.7053	18.837	0.576224	0.237486
330	1243.6	749.184	57.7744	-40.6172	0.728383	-0.512076
331	1246.18	451.746	101.338	89.6337	1.27761	1.13005
333	1286.95	1109.75	-22.5234	-82.3289	-0.283961	-1.03795
334	1268.52	171.803	7.31987	-4.73592	0.0922844	-0.0597076
335	1301.5	944.325	123.664	98.1739	1.55908	1.23772
336	1291.58	1464.83	18.0547	-49.3816	0.227622	-0.622573
338	1298.63	435.375	-5.31148	-39.6917	-0.0669638	-0.500408
339	1300.73	855.442	88.276	-111.823	1.11293	-1.40979
340	1311.5	742.546	68.873	84.6411	0.868309	1.0671
341	1301.72	314.344	98.6529	-77.8684	1.24375	-0.981716
342	1299.94	602.067	-62.9792	-20.776	-0.794003	-0.261931
343	1334.82	1315.8	25.8585	4.10673	0.326008	0.0517751
344	1324.69	527.007	-41.0539	-34.9863	-0.517582	-0.441085
346	1345.69	1192.01	65.8655	-19.6794	0.830391	-0.248106
347	1324.67	171.827	44.546	52.0199	0.561609	0.655835
348	1357.95	367.263	2.16671	2.18741	0.0273166	0.0275775
349	1339.58	675.995	53.6066	-62.4723	0.675839	-0.787612
350	1377.94	90.6104	33.3673	87.1733	0.420675	1.09903
351	1363.76	238.039	-35.203	-95.6379	-0.443818	-1.20574
352	1344.58	585.768	79.4422	-16.3801	1.00156	-0.20651
353	1372.73	990.453	57.2673	111.997	0.72199	1.41199
354	1376.36	1603.13	215.524	-17.083	2.7172	-0.215372
355	1371.68	411.803	134.253	-46.3655	1.69258	-0.584548
356	1360.43	838.55	-1.41707	-43.5795	-0.0178656	-0.549424
357	1361.64	1463.42	28.1597	40.9764	0.35502	0.516605
359	1367.57	1073.68	66.4217	8.37942	0.837403	0.105642
360	1383	473.965	40.0239	-65.5298	0.504596	-0.826159
361	1400.97	304.916	121.002	-69.2154	1.52552	-0.872624
362	1393.54	646.216	-49.3398	-85.8843	-0.622045	-1.08278
364	1411.16	901.218	4.99045	28.7468	0.0629164	0.362422
365	1417.63	792.957	56.8763	68.3073	0.717061	0.861176
366	1426.16	1132.8	108.38	-57.3596	1.36639	-0.723154
367	1409.7	548.946	50.1116	51.5133	0.631775	0.649448
368	1421.76	1268.2	38.2385	-46.3926	0.482087	-0.584889
369	1429.41	1457.81	86.3646	83.8642	1.08883	1.05731
370	1452.59	143.495	46.798	44.9302	0.59	0.566452
371	1438.93	1582.17	101.912	26.6043	1.28485	0.33541
372	1452.98	222.2	16.4891	8.30184	0.207884	0.104664
373	1467.19	474.658	-30.8936	76.2626	-0.389487	0.961471
375	1444.9	966.949	-59.8953	-22.2426	-0.755122	-0.280421
376	1451.46	661.792	-47.5688	-95.8812	-0.599717	-1.20881
377	1457.95	350.95	18.2067	113.066	0.229539	1.42546
378	1462.89	1358.23	-32.5995	44.0926	-0.410994	0.555893
379	1483.47	732.911	52.36	-13.228	0.660122	-0.166771
380	1486.78	1039.9	-37.4505	15.3939	-0.472153	0.194077
381	1480.65	70.4204	62.3297	114.814	0.785815	1.44751
382	1488.2	848.072	34.5781	123.534	0.435939	1.55744
383	1537.63	628.615	48.5294	-63.5457	0.611829	-0.801145
386	1503.55	1230.62	32.5041	80.1829	0.409791	1.0109
387	1513.05	1120.68	91.8908	-53.3816	1.1585	-0.673002
388	1507.65	1534.27	72.831	1.27672	0.918208	0.0160961
389	1508.97	932.807	-50.7383	-2.11893	-0.639677	-0.0267142
390	1528	1439.31	85.6974	91.5096	1.08042	1.1537
391	1524.21	288.933	25.597	82.3429	0.322711	1.03813
392	1530.78	357.662	-50.0885	30.0988	-0.631484	0.379467
393	1544.69	172.065	61.9354	34.1236	0.780843	0.430209
394	1550.7	424.88	-52.5934	102.398	-0.663065	1.29096
395	1526.91	1339.3	-38.5519	68.9286	-0.486039	0.869009
396	1526.86	694.899	-80.1339	8.74171	-1.01028	0.11021
397	1550.39	820.767	25.8553	30.083	0.325968	0.379268
398	1594.16	223.395	37.2446	60.2832	0.469557	0.760014
399	1547.46	539.982	-24.5878	27.4837	-0.309988	0.346497
400	1587	116.069	64.5144	74.1668	0.813358	0.935049
401	1576.33	960.384	41.8536	-6.69421	0.527665	-0.0843964
402	1602.04	785.003	-87.8238	-15.4801	-1.10723	-0.195163
403	1571.08	58.8031	14.3989	114.542	0.181533	1.44408
404	1615.22	485.06	16.9988	16.0673	0.214311	0.202566
405	1582.37	1248.49	-2.35381	23.7529	-0.0296754	0.299461
407	1573.76	1083.63	99.9245	-51.3316	1.25979	-0.647157
408	1589.67	1540.3	-27.7833	48.6264	-0.350275	0.613052
409	1580.88	1143.93	118.843	-21.2753	1.4983	-0.268225
410	1599.45	1343.35	63.8835	-54.5115	0.805404	-0.687247
412	1614.7	339.466	-24.0026	-11.3649	-0.30261	-0.143282
413	1609.57	46.4394	44.903	64.7854	0.56611	0.816775
414	1631.69	569.161	23.415	-76.0932	0.295202	-0.959336
415	1601.21	1194.33	0.155987	-168.51	0.00196658	-2.12447
417	1635.4	1048.18	96.5444	67.2976	1.21717	0.848446
418	1630.31	1405.36	37.3889	-49.5318	0.471377	-0.624467

## Sheet: LpPolarity
23	61.1339	791.021	-3.81287	-13.64	-0.127854	-0.457381		0.0365202	20.2433
24	23.9495	181.124	-5.80419	-1.42814	-0.194627	-0.0478886
25	54.8975	398.24	16.8671	-6.57009	0.565592	-0.22031
26	64.1134	1277.62	17.718	0.556706	0.594124	0.0186676
27	43.8921	57.7312	7.12014	-6.31181	0.238754	-0.211649
28	58.9712	898.105	2.83688	-0.201829	0.095127	-0.00676779
29	74.8332	679.528	20.0804	-18.5184	0.673341	-0.620965
30	59.8785	1103.24	-4.85898	6.68223	-0.162932	0.22407
31	71.915	727.577	12.9396	-6.64034	0.433893	-0.222665
32	63.2725	1345.77	5.90125	17.8539	0.197882	0.59868
33	58.1658	1163.36	19.2058	-7.03016	0.644013	-0.235737
34	78.8645	840.299	11.8771	-8.16185	0.398266	-0.273685
35	70.1992	154.134	-6.52421	-10.7326	-0.218771	-0.359887
36	73.7591	621.274	6.40612	8.06221	0.214812	0.270344
37	75.9784	1041.79	0.206603	19.4168	0.00692787	0.651087
39	66.1835	998.412	12.5695	-22.4511	0.421483	-0.752834
40	97.3787	68.6145	-12.8894	-3.75439	-0.432209	-0.125893
41	96.1464	947.678	5.60317	-1.65852	0.187887	-0.0556137
42	81.5566	265.177	5.8043	10.0398	0.194631	0.336655
43	102.389	473.566	-18.6107	-2.06264	-0.624059	-0.0691647
44	89.2546	1421.37	2.43205	3.8943	0.0815519	0.130584
45	104.945	198.13	0.391249	-0.403855	0.0131195	-0.0135422
46	109.198	328.565	-11.7238	0.204344	-0.393125	0.00685211
47	119.557	544.113	-6.39459	-12.7836	-0.214425	-0.428661
49	130.915	401.042	11.5591	-3.55465	0.387604	-0.119195
50	146.709	1143.7	2.38745	-5.08781	0.0800566	-0.170606
51	117.451	1356.07	-2.94702	7.20837	-0.0988203	0.241713
52	150.306	991.952	7.23052	3.80204	0.242456	0.127491
53	132.256	1079.99	9.16259	6.22096	0.307242	0.208602
55	143.679	1241.07	3.43147	-5.14391	0.115065	-0.172487
56	171.395	64.5203	1.95327	-8.40901	0.0654974	-0.281973
57	150.519	807.086	11.0205	-30.2963	0.36954	-1.0159
58	158.482	880.008	11.1416	8.12596	0.373604	0.272482
59	160.901	581.686	-10.3915	-2.75596	-0.34845	-0.0924135
60	147.154	1425.74	-10.8694	-10.1899	-0.364474	-0.34169
61	165.29	237.408	11.817	-7.77564	0.39625	-0.260734
62	178.905	701.508	13.0324	1.84276	0.437004	0.061792
63	191.351	1299.58	4.1584	1.21136	0.13944	0.0406195
64	168.319	151.945	8.65169	1.05956	0.29011	0.0355293
65	195.523	455.375	-22.6276	-11.6869	-0.758755	-0.391887
66	183.934	1051.24	-6.33484	-0.117305	-0.212421	-0.00393351
67	181.177	1376.22	25.0801	13.4108	0.840993	0.449696
68	190.734	925.296	6.44243	31.5424	0.216029	1.05769
69	179.678	300.004	7.05431	-6.66689	0.236547	-0.223556
70	213.679	633.123	7.07738	13.7861	0.23732	0.46228
71	215.745	1181.53	-10.853	9.49674	-0.363926	0.318447
72	198.356	360.178	-17.9735	-22.9719	-0.602691	-0.7703
73	216.753	763.492	-9.65012	-17.9827	-0.32359	-0.603002
74	264.019	82.8876	1.86702	-2.36999	0.0626053	-0.0794711
75	235.709	180.708	0.952702	4.34534	0.0319462	0.145709
76	247.367	1390.11	12.5203	3.61644	0.419834	0.121267
77	242.563	514.94	10.2385	0.791566	0.343321	0.026543
78	232.139	849.989	-2.48316	23.6185	-0.0832658	0.791979
79	259.083	1099.33	0.852653	25.4728	0.0285913	0.85416
81	229.379	992.111	14.0016	27.6463	0.469503	0.927043
82	252.16	369.664	-2.3114	3.54773	-0.0775065	0.118963
83	230.325	575.984	19.4541	0.95722	0.652339	0.0320977
85	278.997	1009.39	21.1621	19.356	0.709614	0.649051
86	248.747	286.023	2.13875	-9.54959	0.071717	-0.320219
87	263.998	943.104	11.4614	1.02094	0.384325	0.0342344
88	285.836	1204.72	8.79237	-13.1605	0.294828	-0.441299
89	281.459	775.461	6.9711	-16.5144	0.233756	-0.553765
90	276.3	886.23	-3.25893	-6.95629	-0.109279	-0.23326
91	286.16	218.537	-22.8744	-6.85959	-0.76703	-0.230017
92	274.984	1276.14	21.8928	-7.33579	0.734113	-0.245985
93	278.91	428.225	-6.31222	-3.99017	-0.211663	-0.133799
95	305.211	567.349	2.18975	-4.9258	0.073427	-0.165173
96	300.491	1041.98	-14.6406	-20.8332	-0.490931	-0.698585
97	292.594	695.106	-7.51062	10.2721	-0.251848	0.344448
98	293.373	632.739	-9.01424	-2.32265	-0.302267	-0.0778837
99	311.881	1324.45	-7.57488	-7.99019	-0.254003	-0.267929
100	327.592	140.302	20.8031	-23.1342	0.697575	-0.775741
101	332.369	1396.61	-3.86555	-5.75297	-0.129621	-0.19291
102	305.006	1146.19	-19.4688	26.1919	-0.652831	0.878272
103	308.513	318.154	0.30337	1.61684	0.0101727	0.0542163
104	333.581	844.758	11.126	-18.7588	0.373079	-0.629025
105	331.604	489.29	-17.3875	10.42	-0.583041	0.349407
107	326.765	1242.78	-2.29581	-9.70193	-0.0769838	-0.325327
108	355.173	360.481	3.71717	-17.5295	0.124645	-0.587804
109	360.82	238.237	0.316202	-11.6528	0.0106029	-0.390744
110	352.788	930.582	23.5429	7.89344	0.789445	0.264685
111	358.536	428.079	8.71056	-15.4525	0.292084	-0.518158
113	334.996	1079.72	14.9047	-5.44296	0.499787	-0.182515
114	353.737	645.27	6.52623	7.42227	0.218839	0.248885
116	364.587	1448.79	-13.0736	4.88478	-0.438386	0.163798
117	373.776	740.932	11.2382	-2.59865	0.37684	-0.0871384
118	381.353	785.816	12.1316	-12.9276	0.4068	-0.43349
119	368.988	1135.1	-3.08382	-8.18309	-0.103407	-0.274397
120	377.609	1197.32	-7.44104	-15.8592	-0.249515	-0.531793
121	371.682	997.753	33.5478	3.717	1.12493	0.124639
122	386.427	1265.58	9.80403	5.8542	0.328751	0.196304
123	394.782	685.386	8.35437	12.6055	0.280141	0.422689
124	383.248	1325.13	6.23193	-5.24924	0.208971	-0.176019
125	392.896	1065.54	9.96439	-12.2243	0.334128	-0.409908
126	390.094	553.681	6.75396	10.2804	0.226475	0.344723
127	413.976	117.664	17.1482	-3.0395	0.575018	-0.101921
128	399.779	824.743	15.8801	6.82113	0.532495	0.228728
129	422.319	867.736	-9.18664	0.302112	-0.308048	0.0101305
131	430.717	427.326	-3.42079	0.911225	-0.114707	0.0305554
132	427.957	609.643	-6.43824	-7.46647	-0.215889	-0.250367
133	416.232	1396.64	20.1561	9.4468	0.675878	0.316772
134	448.137	485.658	11.6977	14.2801	0.392251	0.478843
135	423.71	242.8	-4.32483	-1.3791	-0.145021	-0.0462442
136	420.384	328.635	3.79262	5.38862	0.127175	0.180692
137	433.127	1197.92	5.51292	11.1075	0.184861	0.372459
138	432.993	933.758	-2.9457	16.2275	-0.098776	0.544143
139	457.848	990.812	26.9706	-16.4703	0.904384	-0.552287
140	448.872	1346.54	2.39571	3.16645	0.0803334	0.106178
141	440.404	1117.7	23.8344	5.93341	0.79922	0.198961
142	470.966	181.618	13.9111	-13.0312	0.46647	-0.436966
143	458.467	1445.13	-18.1183	15.1504	-0.607546	0.508026
144	485.641	337.709	3.3754	10.6484	0.113185	0.357064
145	474.494	265.388	4.92533	-13.7158	0.165157	-0.459923
146	450.722	1265.81	-3.80626	-4.22922	-0.127632	-0.141815
147	466.186	715.258	-17.4192	5.11582	-0.584104	0.171545
148	445.785	790.7	-0.842917	28.0338	-0.0282649	0.940036
150	469.347	545.323	-24.4561	-11.2122	-0.820066	-0.375969
151	487.523	641.041	-2.91028	-19.7206	-0.097588	-0.661277
152	484.178	1043.32	15.9219	-13.978	0.533896	-0.468713
153	492.547	1300.19	8.92878	-9.42576	0.299402	-0.316067
155	488.873	895.005	-8.63279	-10.5197	-0.289477	-0.35275
156	498.527	116.03	-2.23391	2.6625	-0.0749081	0.0892797
157	505.658	1370.63	5.41242	-10.571	0.181491	-0.354468
158	496.501	778.906	4.3885	-3.30027	0.147156	-0.110665
159	492.188	1189.45	4.78942	-0.336978	0.1606	-0.0112996
160	504.14	1126.33	19.0727	15.2321	0.639551	0.510766
161	535.353	838.035	0.13967	26.4078	0.00468344	0.885513
162	529.272	365.183	-3.87154	18.0554	-0.129821	0.605439
163	533.087	1422.66	-14.6892	-10.3993	-0.492562	-0.348712
165	513.295	1072.33	-7.54843	-11.6816	-0.253116	-0.39171
166	503.731	433.447	6.18909	-27.3255	0.207534	-0.916285
167	512.109	1248.42	-6.96725	0.758684	-0.233627	0.0254404
168	543.897	921.212	7.68034	-22.5274	0.257539	-0.755392
169	535.792	556.775	-25.6077	-13.8067	-0.858683	-0.46297
170	543.916	719.599	-29.9996	12.2407	-1.00595	0.410459
172	560.103	659.974	10.1922	-6.14003	0.341767	-0.205889
173	555.142	186.672	6.14594	2.74204	0.206087	0.0919466
174	558.287	256.451	28.7304	-1.59385	0.963396	-0.0534453
175	546.387	977.957	13.6722	2.05582	0.45846	0.0689364
176	555.49	1310.98	10.6544	8.88886	0.357266	0.298063
177	551.225	60.2387	-6.91367	24.7751	-0.231831	0.830766
178	555.396	471.166	-28.0437	10.4827	-0.940369	0.351508
179	566.489	1176.77	-2.72715	5.25955	-0.0914475	0.176364
180	577.88	116.438	0.947882	2.85282	0.0317846	0.0956613
181	572.719	1105.51	-17.6315	10.5498	-0.591224	0.35376
182	572.378	1029.64	0.74301	-14.8634	0.0249148	-0.498403
183	579.258	774.328	3.99169	5.73566	0.13385	0.19233
184	602.036	406.164	18.3408	-15.1724	0.615008	-0.508765
185	580.343	1233.8	-4.55647	0.900925	-0.152789	0.03021
186	589.144	1367.49	-8.10693	-12.1904	-0.271844	-0.408772
187	605.226	851.32	-0.304617	0.0887953	-0.0102145	0.0029775
189	605.622	323.62	-0.249246	-2.1061	-0.00835777	-0.0706222
190	610.652	504.277	13.1646	-11.915	0.441439	-0.399535
191	623.6	906.554	15.0228	10.4472	0.503749	0.350318
192	614.813	577.89	-4.20863	8.9267	-0.141125	0.299332
193	619.63	629.375	-12.9714	-15.1116	-0.434958	-0.506726
194	617.398	1262.84	-15.0775	-15.0555	-0.505581	-0.504844
195	617.427	695.259	12.9329	16.0675	0.433671	0.53878
196	620.646	966.557	-22.4115	-9.63465	-0.751507	-0.323071
197	619.169	1075.47	10.717	-9.49336	0.359366	-0.318334
198	625.458	1302.44	-4.91113	1.19976	-0.164681	0.0402305
199	625.742	1454.85	20.2252	-1.11569	0.678197	-0.0374117
200	649.519	1391.46	0.26243	1.00472	0.00879988	0.0336906
201	623.642	240.82	5.15297	5.70512	0.172791	0.191305
202	645.53	185.078	20.189	-13.1141	0.676981	-0.439744
204	655.586	1017.76	-22.8884	-7.70412	-0.767498	-0.258336
206	652.699	1166.34	-24.4863	3.55765	-0.821079	0.119296
207	648.443	92.766	6.86828	-15.1529	0.230309	-0.508111
208	644.278	764.127	0.186594	4.90291	0.0062569	0.164406
209	674.324	1317.85	11.1581	-9.2357	0.374155	-0.309694
210	671.967	1211.54	9.51564	6.60054	0.319081	0.221331
211	665.78	549.63	-1.48675	35.017	-0.049854	1.1742
212	676.642	1078.63	15.9151	-16.4418	0.533667	-0.551329
213	683.041	438.482	0.606034	11.9323	0.0203217	0.400116
214	693.629	366.226	5.96599	-7.45577	0.200053	-0.250009
215	665.096	491.97	8.08372	4.02567	0.271065	0.13499
216	699.608	1115.71	17.4441	-17.1622	0.584941	-0.575486
217	689.137	258.075	-10.9269	8.47084	-0.366404	0.284046
218	699.076	133.861	-6.89425	-20.2614	-0.231179	-0.679408
219	681.682	622.439	-3.95675	24.1176	-0.132679	0.808718
220	720.171	305.068	3.52536	-19.715	0.118213	-0.661089
221	690.318	855.149	4.93529	-0.91972	0.165491	-0.0308403
222	678.201	1257.49	10.8298	-3.15507	0.363148	-0.105797
223	703.089	680.003	9.08846	10.7563	0.304756	0.360683
224	688.448	948.795	-8.19995	-2.81628	-0.274963	-0.0944361
226	686.13	1426.65	19.6225	5.1976	0.657987	0.174287
227	710.03	763.162	10.5778	9.38651	0.354696	0.314751
228	754.254	199.312	0.498628	-10.7345	0.0167201	-0.359952
229	720.864	508.531	2.27257	-5.76654	0.0762042	-0.193365
230	720.76	1329.28	-7.08591	1.26882	-0.237606	0.0425463
231	732.355	996.585	14.2741	9.45291	0.478642	0.316977
232	738.817	1225.95	-8.3391	22.7478	-0.279628	0.762785
233	758.095	1044.82	-1.34567	-2.45064	-0.0451233	-0.0821755
235	749.051	1403.46	-7.10352	-12.4046	-0.238197	-0.415953
237	767.143	53.6068	-9.5103	6.80148	-0.318901	0.228069
238	734.116	1168.85	18.4233	-4.1435	0.617774	-0.138941
239	750.685	593.955	-3.86133	5.06909	-0.129479	0.169978
240	751.012	928.135	10.1517	0.133218	0.34041	0.00446711
241	773.357	711.521	12.0408	-0.081024	0.403756	-0.00271692
242	765.658	1275.16	-6.59222	9.3311	-0.221052	0.312893
243	750.386	854.341	-3.19173	9.80294	-0.107026	0.328714
244	767.902	411.47	9.08159	-3.1032	0.304526	-0.104057
245	775.26	1097.51	9.13893	-10.7587	0.306449	-0.360764
246	785.945	110.954	2.49113	7.84862	0.0835331	0.263182
247	769.772	515.389	-13.0753	8.27553	-0.438443	0.277497
248	775.944	796.485	26.8611	-13.5875	0.900713	-0.45562
249	797.84	300.091	-8.73432	13.9425	-0.292881	0.467524
250	802.287	1324.47	2.88005	-8.2029	0.0965744	-0.275062
251	792.409	1166.65	16.3845	-15.8464	0.549408	-0.531364
253	830.569	633.06	23.1513	-12.1498	0.776314	-0.407411
254	819.227	436.942	-8.96475	20.0552	-0.300608	0.672494
255	821.698	1100.33	-26.6226	17.2422	-0.892716	0.57817
256	807.01	978.385	4.97482	17.023	0.166817	0.570818
257	815.022	592.36	18.1821	-31.1865	0.609688	-1.04575
258	807.915	857.068	12.8057	-19.0212	0.429403	-0.637824
259	825.742	928.776	-4.65078	-6.24053	-0.155951	-0.209259
260	837.419	1219.76	-7.2797	3.92928	-0.244105	0.131757
261	828.584	1029.48	-5.81642	2.16131	-0.195037	0.0724735
262	817.971	1383.16	4.89665	6.29075	0.164196	0.210943
264	833.846	762.537	-5.52657	-12.5174	-0.185318	-0.419735
265	847.993	541.72	-6.40534	6.56537	-0.214785	0.220151
266	836.322	493.01	-7.68161	-18.6614	-0.257582	-0.625758
267	843.678	158.567	20.0915	-2.7636	0.673711	-0.0926697
268	844.8	1271.39	-9.7252	-15.5702	-0.326108	-0.522104
269	885.742	1394.82	-2.44498	1.25583	-0.0819855	0.0421109
270	861.18	234.205	18.6139	5.72006	0.624165	0.191806
271	875.192	1174.91	-8.68454	-7.44163	-0.291212	-0.249534
272	863.183	327.199	-2.59213	-2.43639	-0.08692	-0.0816976
273	871.274	682.103	3.51591	2.58204	0.117896	0.0865816
274	869.476	1456.73	-3.74216	-12.1361	-0.125483	-0.406951
275	859.351	1124.59	15.261	-12.9292	0.511734	-0.433544
276	886.296	396.25	3.0218	6.9068	0.101328	0.2316
277	869.781	854.307	-7.0062	-11.7495	-0.234934	-0.393988
280	899.389	797.399	-3.12881	-15.4702	-0.104916	-0.51875
281	902.96	984.385	-6.6053	20.3563	-0.22149	0.682592
283	874.758	1329.05	19.1651	25.0032	0.642649	0.838414
284	905.084	126.531	6.39631	-5.85598	0.214482	-0.196364
285	891.623	1033.22	30.6988	-6.09119	1.0294	-0.204251
286	903.394	889.315	-11.1654	-16.1951	-0.374402	-0.543056
287	912.803	585.265	-4.21522	-4.42609	-0.141346	-0.148417
288	906.922	1083.74	4.4525	3.35383	0.149302	0.112461
289	945.539	1302.97	-4.17912	-6.71811	-0.140135	-0.225273
290	925.544	737.034	-0.393449	-21.4457	-0.0131932	-0.719122
291	931.611	929.169	11.8063	-11.978	0.395892	-0.40165
292	947.458	285.997	-8.64573	12.2711	-0.28991	0.411477
293	920.067	461.086	-9.92656	-10.3136	-0.33286	-0.345838
294	939.158	1223.93	-7.12762	-25.999	-0.239005	-0.871806
295	947.653	206.185	11.4882	-13.2946	0.385225	-0.445799
296	926.91	518.529	10.4445	18.5265	0.350227	0.621235
297	942.157	1154.81	-11.1786	-3.02679	-0.374844	-0.101495
299	948.361	1104.18	-17.2738	-8.11193	-0.579229	-0.272011
300	957.024	1421.93	-11.5517	-4.76909	-0.387354	-0.159918
301	987.399	590.378	-12.6035	31.0337	-0.422624	1.04063
302	957.436	675.59	5.17826	-4.21741	0.173639	-0.141419
303	959.997	1050.48	-3.4526	24.5542	-0.115773	0.823356
304	954.694	963.431	9.00272	20.0424	0.301881	0.672067
305	964.56	371.071	-14.7547	1.33455	-0.49476	0.0447506
307	976.597	881.092	5.84387	5.54561	0.195958	0.185957
308	975.541	453.746	-16.0856	-21.3237	-0.539385	-0.715032
309	979.42	517.891	1.95671	-25.6606	0.0656128	-0.860457
310	988.056	783.352	7.8504	-5.67391	0.263242	-0.190259
311	994.107	119.738	-5.96098	-11.5922	-0.199885	-0.388713
312	1007.76	975.789	11.6536	-7.6608	0.39077	-0.256884
313	1004.27	1110.54	-9.31801	5.03957	-0.312454	0.168988
315	1017.1	1174.37	0.189591	-9.718	0.0063574	-0.325866
316	1020.45	673.826	11.5422	-28.4395	0.387036	-0.953639
317	1016.33	916.713	-23.8235	-9.91344	-0.798855	-0.33242
318	1039.05	1232.07	11.15	-14.04	0.373884	-0.470793
319	1045.47	836.381	-16.7981	33.4022	-0.563277	1.12005
320	1030.95	1033.62	6.52081	-6.55171	0.218657	-0.219693
321	1033.98	313.174	6.06105	-2.74905	0.20324	-0.0921819
322	1027.62	1399.39	10.6586	19.4636	0.357408	0.652657
323	1026.4	412.107	-5.89288	-16.7001	-0.197601	-0.559991
324	1016.71	1301.59	-5.43574	-7.87965	-0.182273	-0.264222
325	1066.46	194.225	1.20135	4.83231	0.0402838	0.162038
326	1026.7	254.969	13.6737	-6.20603	0.45851	-0.208102
327	1061.19	65.4072	-9.24562	-22.3482	-0.310026	-0.749385
328	1056.99	598.59	-2.61973	-13.7784	-0.0878453	-0.462019
330	1054.57	522.499	12.0658	24.8101	0.404594	0.831937
331	1070.05	1294.1	4.16579	10.7965	0.139688	0.362031
332	1067	1365.08	-8.11428	5.81381	-0.27209	0.19495
333	1057.79	1073.76	14.2781	-17.2245	0.478777	-0.577575
334	1080.16	457.416	0.981454	-14.1866	0.0329104	-0.475707
335	1087.93	386.437	-5.17689	8.17178	-0.173593	0.274018
336	1088.19	1108.04	0.774115	-2.02383	0.0259578	-0.0678635
337	1087.39	754.765	6.29156	17.4339	0.21097	0.584596
338	1091.63	981.271	-23.4337	15.0292	-0.785782	0.503962
340	1096.71	921.562	-9.82288	3.36568	-0.329383	0.112859
341	1067.32	128.999	-19.0793	9.13395	-0.639773	0.306282
342	1096.72	654.527	-8.88711	-8.18002	-0.298005	-0.274294
343	1098.22	1168.76	-11.7603	-19.2002	-0.394347	-0.643825
344	1118.32	262.517	2.17854	12.8558	0.0730514	0.431084
346	1121.56	325.084	12.0068	-5.1871	0.402615	-0.173935
347	1117.6	1034.8	3.71697	3.06955	0.124638	0.102929
349	1122.16	106.941	2.55387	-22.2278	0.085637	-0.745347
350	1128.38	827.95	-7.73208	-1.34926	-0.259274	-0.0452436
351	1133.48	1332.27	3.68658	-1.4794	0.123619	-0.0496076
353	1143.3	584.196	-24.0199	1.78163	-0.805442	0.0597421
354	1137.17	512.334	15.0748	-3.28539	0.505492	-0.110166
355	1129.58	369.797	-20.7246	-17.4451	-0.694942	-0.584973
356	1135.95	1421.31	1.99364	-2.15116	0.0668513	-0.0721331
357	1183.7	705.293	-13.6578	11.1261	-0.457976	0.373084
358	1161.49	1197.99	-6.73698	-16.8098	-0.225906	-0.563671
359	1152.55	1257.95	0.811966	14.3621	0.027227	0.481593
360	1141.16	159.63	0.123445	-6.81061	0.00413937	-0.228375
361	1164.96	866.017	14.6883	-1.64413	0.492533	-0.0551313
362	1172.51	434.472	3.17131	9.90942	0.106341	0.332285
363	1155.63	1130.93	-16.2168	13.7273	-0.543786	0.460306
364	1166.93	758.868	14.5629	-18.2607	0.488326	-0.612323
365	1180.17	1071.68	0.579984	15.6597	0.0194481	0.525105
366	1207.87	213.102	-2.34583	-1.92097	-0.0786609	-0.0644144
367	1179.56	994.74	15.8904	1.71695	0.532839	0.057573
368	1198.5	1392.23	-8.96135	12.7506	-0.300494	0.427555
369	1188.52	916.123	-11.0231	-14.8596	-0.369629	-0.498276
370	1194.74	368.686	-6.23374	2.36954	-0.209031	0.079456
371	1221.79	625.334	5.30364	6.61018	0.177843	0.221654
372	1198.67	99.941	10.4177	6.5506	0.349328	0.219656
373	1203.65	303.182	19.8886	-8.14752	0.666909	-0.273204
375	1241.93	141.924	2.60946	-20.2937	0.0875011	-0.680494
377	1223.98	485.79	13.2938	-1.10643	0.445769	-0.0371012
378	1213.67	1145.13	0.281885	-3.98259	0.00945224	-0.133545
379	1214.45	1335.98	4.41271	-5.36998	0.147968	-0.180067
380	1227.75	1215.91	-7.27854	1.93592	-0.244066	0.0649157
381	1230.28	829.818	7.71599	-38.2365	0.258734	-1.28216
382	1231.24	959.361	-13.846	-36.4467	-0.464288	-1.22214
383	1265.32	527.124	-9.07819	2.59186	-0.304412	0.0869109
384	1244.25	1271.84	-23.5006	11.4828	-0.788029	0.385046
385	1248.21	1031.8	28.3724	25.0591	0.951389	0.840286
386	1281.4	62.3896	-10.2089	3.2818	-0.342327	0.110046
389	1290.89	285.251	-0.883179	-19.1066	-0.0296149	-0.640688
390	1270.6	1098.29	14.1107	-4.42397	0.473164	-0.148345
391	1290.16	424.099	7.73934	13.7182	0.259517	0.460001
392	1275.81	911.271	8.53535	-28.7029	0.286209	-0.962471
393	1281.53	788.177	-8.16012	15.238	-0.273627	0.510964
394	1269.2	1147.14	9.23946	8.07376	0.30982	0.270731
395	1286.15	574.044	-26.8447	9.4377	-0.900163	0.316467
396	1290.07	1410.02	1.39204	-4.01169	0.046678	-0.134521
397	1280.88	356.22	-11.588	-16.0926	-0.388571	-0.539621
398	1276.49	673.771	6.45592	12.6936	0.216481	0.425644
399	1308.51	728.688	-6.05623	-5.03596	-0.203079	-0.168867
401	1280.53	1318.75	21.4338	-3.96583	0.718723	-0.132983
402	1276.17	1358.44	16.3485	17.1118	0.548203	0.573798
403	1292.77	849.576	-17.0838	-10.1972	-0.572857	-0.341935
405	1334.21	980.4	-14.4958	-33.6438	-0.486075	-1.12815
406	1323.98	175.883	7.98048	-22.839	0.267603	-0.765841
407	1321.98	1254.42	-16.3339	-5.46294	-0.547713	-0.183185
408	1332.1	1053.04	27.0599	17.8794	0.907379	0.599536
409	1352.44	94.9644	13.4538	-0.176392	0.451137	-0.00591482
410	1343.59	1174.04	-20.9286	0.855949	-0.701782	0.0287019
411	1355.16	857.125	1.56623	-29.4456	0.0525191	-0.987377
412	1348.49	1379.29	-1.80797	8.68912	-0.0606252	0.291365
413	1356.58	1120.91	10.7116	1.37869	0.359183	0.0462306
414	1350.93	572.625	-5.22144	-14.9339	-0.175087	-0.500767
415	1357.21	622.301	-0.790286	-3.75475	-0.0265001	-0.125905
416	1345.83	238.085	40.0661	23.1111	1.34351	0.774966
417	1376.26	782.962	-22.9949	-6.92583	-0.771071	-0.232239
418	1366.51	353.651	3.10375	-3.21525	0.104076	-0.107815
419	1388.66	914.021	-0.545659	-13.3569	-0.0182972	-0.447887
420	1365.68	451.418	17.2135	-2.26704	0.577207	-0.076019
421	1385.5	503.817	3.55686	-4.34781	0.11927	-0.145792
422	1395.89	685.653	-28.2459	-15.6269	-0.947148	-0.524006
424	1364.63	1235.74	-11.9486	7.0118	-0.400664	0.235121
426	1386.97	1320.89	-2.31168	12.9618	-0.0775158	0.434639
427	1414.22	255.676	17.1157	30.6169	0.573927	1.02665
428	1392.65	646.792	-18.559	-20.8558	-0.622326	-0.699341
429	1416.37	1217.76	-1.01874	3.45957	-0.0341607	0.116007
430	1402.39	47.1931	-20.1212	28.0835	-0.674708	0.941704
431	1423.4	193.615	-14.4953	-0.537822	-0.486059	-0.0180344
432	1425.11	392.583	0.364061	3.84467	0.0122078	0.12892
433	1414.78	307.338	-13.994	-0.149527	-0.46925	-0.00501397
434	1427.8	993.641	-2.65753	13.3784	-0.0891127	0.448608
435	1444.84	133.752	9.49944	-8.67561	0.318537	-0.290913
436	1425.35	1056.1	8.27413	-11.1656	0.27745	-0.374409
437	1415.32	1402.88	-17.3653	6.97605	-0.582298	0.233922
439	1426.46	1131.82	-2.61086	1.65858	-0.0875481	0.055616
440	1457.15	534.355	-9.04838	-8.1882	-0.303412	-0.274569
441	1414.41	604.927	14.4084	-16.7386	0.483147	-0.561282
442	1471.81	77.767	14.5104	6.93389	0.486566	0.232509
443	1445.52	826.872	15.1528	8.50671	0.508106	0.285249
444	1454.66	1318.35	15.9054	-11.9427	0.533345	-0.400464
446	1467.46	702.737	-14.6424	15.963	-0.490991	0.535275
447	1437.76	450.684	33.9135	27.6402	1.13719	0.926838
448	1461.71	1447.7	-7.57944	56.1876	-0.254156	1.88409
449	1473.23	883.297	1.22141	-14.6624	0.0409564	-0.491664
450	1467.59	611.314	-8.43751	5.96881	-0.282929	0.200148
451	1476.48	1231.87	-4.06412	6.90926	-0.136279	0.231683
452	1475.1	287.793	14.3074	-0.669355	0.479757	-0.022445
454	1479.1	770.457	-12.0542	7.34007	-0.404205	0.246129
455	1439.82	1427.42	88.8191	20.0993	2.9783	0.673974
456	1488.9	355.879	3.41993	-2.16879	0.114678	-0.0727244
457	1482.89	1079.55	15.0242	11.1205	0.503794	0.372896
458	1451	1411.5	-22.1313	52.6682	-0.742112	1.76608
459	1489.35	1389.18	-4.81585	3.11349	-0.161486	0.104402
460	1489.36	1274.61	-29.1685	38.8105	-0.978085	1.3014
461	1480.94	1141.95	3.51494	-15.9057	0.117864	-0.533354
462	1513.16	431.817	8.58982	10.7292	0.288036	0.359774
463	1520.23	923.592	-15.8749	-12.4623	-0.532321	-0.417888
464	1507.32	1020.66	2.88423	8.80883	0.0967147	0.29538
465	1528.22	216.78	-32.8892	-0.405125	-1.10285	-0.0135847
466	1533.24	976.002	10.7198	7.43288	0.359459	0.249241
467	1520.97	164.484	-19.6124	18.0532	-0.657646	0.605363
468	1533.56	490.674	-9.8887	6.73378	-0.33159	0.225799
469	1544.61	621.895	-26.0082	9.81839	-0.872114	0.329232
470	1549.66	1199.56	-6.9917	-5.25643	-0.234447	-0.17626
471	1534.87	1132.1	-6.23652	-9.05799	-0.209124	-0.303735
473	1558.22	558.978	-6.82617	-15.0669	-0.228897	-0.505228
474	1546.76	1339.68	-0.675105	7.97216	-0.0226378	0.267324
475	1534.84	760.185	-13.959	-13.0179	-0.468075	-0.436518
476	1556.88	1272.85	6.6782	-23.629	0.223935	-0.792333
477	1546.92	1400.42	0.221652	-1.84195	0.00743247	-0.0617646
478	1561.41	682.172	-29.7739	1.40353	-0.998386	0.0470634
479	1579.44	238.063	-8.21129	-1.9343	-0.275343	-0.0648615
480	1561.17	849.835	-1.97677	4.14875	-0.0662855	0.139117
481	1538.8	60.7573	9.75003	-0.7555	0.32694	-0.0253336
482	1553.54	1073.58	-17.85	13.4191	-0.59855	0.449972
486	1591.63	142.616	-1.4602	-0.163525	-0.0489639	-0.00548337
487	1587.69	1039.85	17.4224	-2.72845	0.584213	-0.0914909
489	1600.16	754.409	-7.48741	-5.32163	-0.25107	-0.178446
491	1595.36	1133.85	-5.23506	-15.8609	-0.175543	-0.53185
492	1570	1493.33	-24.6524	-11.5108	-0.82665	-0.385984
493	1592.62	495.94	0.0620676	-2.98365	0.00208127	-0.100048
496	1607.99	1415.85	5.85712	12.5628	0.196402	0.421257
25	57.8498	785.317	4.24377	3.81587	0.156859	0.141043		0.0627287	163.373
26	54.8025	686.331	1.84514	14.1338	0.0682001	0.522416
27	49.7628	1401.62	15.8723	-1.83768	0.586673	-0.0679244
28	80.8086	81.2698	-12.3814	5.79689	-0.457641	0.214265
29	61.7392	550.056	-6.67698	5.48265	-0.246795	0.20265
30	68.2047	728.937	-1.68246	-10.502	-0.0621874	-0.388178
31	83.7583	1354.72	2.04165	-0.779136	0.0754637	-0.0287985
32	68.4449	1546.37	-8.03676	-10.8147	-0.297056	-0.399735
33	87.735	831.187	5.40539	-7.4181	0.199795	-0.274189
34	75.6139	1088.42	-3.9481	-1.86431	-0.14593	-0.0689089
35	84.4376	466.617	13.8569	8.85907	0.51218	0.32745
36	66.0793	1221.81	-12.9902	13.478	-0.480145	0.498177
37	71.6464	224.271	-11.4175	14.9006	-0.422014	0.550759
38	95.6353	653.27	5.57589	19.2852	0.206097	0.712822
39	84.0733	378.883	4.14301	7.49017	0.153134	0.276852
40	93.1006	947.37	12.6651	20.0983	0.468129	0.742875
41	94.9015	318.075	1.40809	-7.82839	0.0520459	-0.289354
42	120.865	606.516	3.4521	7.61433	0.127597	0.281442
43	113.111	1007.27	-8.1797	-0.805992	-0.302339	-0.0297912
44	119.324	1440.99	0.488708	-6.95648	0.0180637	-0.257126
46	138.731	740.413	-2.59331	0.620797	-0.0958542	0.0229459
47	143.212	908.472	1.57013	2.57468	0.0580352	0.0951655
49	165.568	1182.68	7.9017	-1.39417	0.292064	-0.0515315
50	137.973	264.497	-4.17058	1.68421	-0.154153	0.0622519
51	149.155	76.7785	-21.7616	-10.3047	-0.804355	-0.380884
52	156.803	169.074	-3.16213	7.17942	-0.116879	0.265366
53	134.891	529.064	-22.2895	2.11155	-0.823868	0.0780473
54	169.98	861.551	-4.47906	-0.558003	-0.165556	-0.020625
55	153.746	1516.91	2.96792	7.69329	0.1097	0.28436
56	170.221	452.865	-7.24382	-8.28292	-0.267747	-0.306154
57	161.467	1115.56	4.12438	-2.94654	0.152446	-0.10891
58	173.917	1253.89	14.3347	8.3697	0.529839	0.309362
59	150.72	337.66	5.31459	-7.77909	0.196438	-0.287532
61	152.06	1067.23	23.9394	7.05358	0.884851	0.260715
62	186.572	1396.2	-17.9344	22.9868	-0.662892	0.849641
63	188.169	399.602	5.61199	22.7174	0.207431	0.839684
64	196.937	965.058	4.00578	-10.5568	0.148062	-0.3902
65	200.82	772.525	10.5814	2.71048	0.391111	0.100185
66	216.908	1346.64	37.3778	-2.56708	1.38156	-0.0948846
67	210.192	1482.38	-9.57838	17.1602	-0.354037	0.634278
68	176.208	1303.59	11.7414	-6.71071	0.433988	-0.248042
69	192.404	575.296	8.21895	-1.23083	0.30379	-0.0454941
70	201.735	651.799	3.2008	1.77634	0.118308	0.0656573
71	213.746	702.697	7.70437	6.1957	0.28477	0.229006
72	188.012	826.38	4.02648	-11.0314	0.148827	-0.407744
73	209.789	1020.61	0.451178	3.3088	0.0166765	0.1223
75	210.677	234.827	17.854	0.807605	0.659922	0.0298508
77	249.978	323.623	4.3352	-7.16285	0.160238	-0.264754
78	221.762	526.538	9.54033	13.2846	0.352631	0.491027
79	247.08	599.016	6.96712	10.3295	0.25752	0.381802
80	234.023	373.029	0.821849	22.2751	0.0303773	0.823336
81	227.282	1074.11	11.6094	7.58447	0.429108	0.280338
82	264.856	1462.21	9.80188	-1.41268	0.362298	-0.0522156
83	239.13	91.5873	20.7579	-11.8036	0.767255	-0.436286
84	266.864	1425.31	12.8435	8.43805	0.474725	0.311888
85	286.615	270.212	2.99307	10.135	0.11063	0.374612
86	253.105	805.153	-5.4809	-5.28829	-0.202586	-0.195466
87	251.536	905.352	-13.9084	8.17015	-0.514084	0.301986
88	269.475	1118.82	0.443954	9.19667	0.0164095	0.339928
89	236.097	153.455	-1.4079	-6.38623	-0.0520388	-0.236049
90	273.47	1301.33	-0.0525888	-5.2979	-0.00194379	-0.195821
91	274.641	1223.94	13.3592	3.12956	0.493783	0.115675
92	279.07	472.747	-31.8789	-1.09155	-1.17831	-0.0403458
93	272.782	1547.23	16.6955	0.228674	0.6171	0.00845226
94	274.042	197.921	-8.46481	-12.1853	-0.312877	-0.450394
95	268.612	1266.59	13.5782	8.14348	0.501879	0.301
96	324.052	831.015	1.57284	1.68672	0.0581357	0.0623448
97	288.531	1003.38	0.476557	17.9464	0.0176146	0.663339
98	326.848	1175.12	-1.18688	3.78344	-0.0438696	0.139844
99	284.11	686.208	-1.37685	-15.0323	-0.0508911	-0.555626
100	295.627	70.1668	12.2952	-30.6775	0.454458	-1.13391
101	335.24	899.891	-2.67082	-22.3412	-0.0987191	-0.825778
102	302.753	1061.55	-3.77234	-2.95738	-0.139434	-0.109311
103	304.103	732.345	12.5528	8.42068	0.463978	0.311246
104	313.996	398.749	22.1534	-19.6032	0.818838	-0.724577
105	323.748	1389.06	-10.7626	10.9365	-0.397807	0.404237
106	312.905	537.338	3.8168	19.7678	0.141077	0.730658
107	321.801	629.261	1.83474	22.0943	0.067816	0.816653
108	328.942	141.665	-16.3335	-9.72873	-0.603722	-0.359595
111	343.214	1496.99	-3.45117	13.3345	-0.127563	0.49287
112	338.286	955.025	15.345	-7.80685	0.567185	-0.288558
113	336.118	771.846	2.32052	9.62616	0.0857714	0.355803
114	351.651	1343.42	12.8478	-18.0412	0.47488	-0.666841
115	369.007	986.378	3.04258	-19.9809	0.11246	-0.738537
116	352.201	1262.54	-0.115308	1.41461	-0.00426201	0.052287
117	380.654	236.885	0.478983	5.21377	0.0177042	0.192712
118	363.757	1112.39	3.64991	6.42302	0.134908	0.237408
119	360.761	494.772	-1.2429	1.2697	-0.0459402	0.0469307
120	390.045	437.995	0.569326	2.22753	0.0210435	0.0823342
121	395.176	333.204	-5.92152	7.15064	-0.218872	0.264303
122	383.142	712.024	-2.08735	-11.538	-0.0771528	-0.426469
123	406.649	1460.16	-5.04487	-1.22853	-0.186469	-0.0454089
124	389.066	583.214	-1.54129	9.71913	-0.0569693	0.35924
125	397.634	1037.01	0.567411	-9.16697	0.0209727	-0.338831
126	389.946	184.027	-0.212689	-15.3967	-0.00786143	-0.569094
127	403.18	641.16	-7.0059	-8.30077	-0.258953	-0.306814
128	434.781	1085.33	-0.530038	-20.9987	-0.0195913	-0.776156
129	434.604	511.687	-1.02473	-0.791541	-0.037876	-0.029257
130	417.477	109.158	12.3349	-4.25211	0.455925	-0.157167
131	412.492	1232.26	8.5568	-15.1914	0.316277	-0.561508
132	421.215	1333.45	0.348872	-4.84781	0.0128951	-0.179185
133	429.551	1551.36	7.25045	-27.3667	0.267992	-1.01153
135	428.889	1144.41	-15.3001	7.69949	-0.565525	0.28459
136	456.306	754.337	10.2393	19.881	0.378465	0.734844
137	446.644	887.191	0.25419	-6.98265	0.00939539	-0.258093
138	448.923	938.667	0.527021	-3.22207	0.0194798	-0.119094
139	472.513	1417.19	-0.206875	4.77059	-0.00764652	0.176331
140	428.725	818.074	-1.35353	-5.07461	-0.0500294	-0.187568
142	463.899	669.026	-4.40522	-7.00736	-0.162826	-0.259007
143	461.095	1291.92	0.142542	2.8767	0.00526866	0.106329
144	444.678	572.907	-22.8792	23.8444	-0.845662	0.88134
145	467.279	988.331	16.4732	-0.189049	0.608884	-0.00698763
146	475.387	1194.45	-14.2482	-22.0378	-0.526645	-0.814565
147	474.45	154.929	12.2416	-2.37952	0.452476	-0.0879521
148	483.734	408.1	23.8913	-3.80879	0.883075	-0.140781
149	488.384	239.983	5.58521	7.87301	0.206441	0.291003
150	506.34	610.837	22.4276	-0.25968	0.828973	-0.00959832
151	480.049	338.088	3.87509	7.37164	0.143232	0.272471
152	504.723	1249.26	-5.55494	-6.4928	-0.205322	-0.239988
153	513.308	1522.01	21.1869	-4.48513	0.783112	-0.16578
154	505.975	852.43	4.63402	-10.0444	0.171283	-0.371264
155	499.203	1028	-4.91994	-7.41336	-0.181851	-0.274013
156	508.318	1362.23	-1.92049	-2.34564	-0.0709855	-0.0866998
157	513.703	544.563	28.2587	0.322824	1.0445	0.0119322
159	529.266	708.689	-9.37092	-32.3288	-0.346369	-1.19494
160	521.336	807.421	-6.64339	23.9494	-0.245554	0.885222
161	504.844	1139.08	5.27808	4.077	0.195089	0.150694
162	512.309	451.598	-15.6585	-17.1665	-0.57877	-0.634509
163	542.728	1465.98	3.8924	6.8075	0.143871	0.251619
164	532.834	107.548	14.1974	0.0145347	0.524766	0.000537235
165	544.109	1074.74	16.5444	-15.2203	0.611516	-0.562573
166	539.707	933.987	-0.70202	10.5425	-0.0259481	0.389673
167	552.333	482.609	0.0556929	-12.4996	0.00205853	-0.462011
168	547.554	1306.56	4.74636	7.58169	0.175435	0.280235
169	604.275	212.527	5.74017	7.05301	0.212169	0.260694
170	585.79	1182.61	-8.85608	-4.39937	-0.32734	-0.16261
171	565.547	341.698	-4.98527	-20.4439	-0.184266	-0.755649
172	590.928	670.337	-3.62715	-23.7355	-0.134067	-0.877315
173	562.237	892.091	-2.89725	28.7388	-0.107088	1.06224
174	555.375	263.751	26.2798	-0.144368	0.971356	-0.00533615
175	586.191	790.747	-17.706	13.7947	-0.654451	0.50988
176	569.456	980.851	22.3197	-1.49242	0.824985	-0.0551631
179	581.435	404.945	-6.86347	-10.984	-0.253688	-0.405992
180	579.825	165.15	-1.78932	26.5693	-0.0661371	0.982057
181	612.95	740.49	3.70958	-12.1555	0.137114	-0.449292
182	609.686	1395.57	3.37806	11.669	0.12486	0.431312
183	626.379	1263.37	-6.13481	3.64935	-0.226755	0.134888
184	609.471	531.861	15.6623	-11.1283	0.578913	-0.411327
185	617.16	866.857	-4.66504	7.03958	-0.17243	0.260198
186	612.666	1339.03	10.0227	-2.26568	0.370462	-0.0837444
187	624.209	1442.41	-6.81551	-2.46911	-0.251916	-0.0912637
188	614.73	280.092	11.222	0.62704	0.414789	0.0231767
189	612.097	628.871	-1.44606	1.75238	-0.0534493	0.0647715
190	624.108	1104.76	5.89226	-12.0834	0.21779	-0.446629
191	625.883	1513.66	10.9943	2.08353	0.406372	0.0770116
192	634.277	137.482	-9.59777	24.8388	-0.354754	0.918096
193	622.536	992.089	53.9036	-32.7905	1.99239	-1.21201
194	660.225	421.65	-5.32659	1.71944	-0.196882	0.0635541
196	661.589	1046.17	-7.47964	10.4978	-0.276463	0.38802
197	633.85	586.971	13.8942	-11.3537	0.51356	-0.419657
198	661.862	83.3263	-10.4844	-5.26839	-0.387524	-0.194731
199	658.759	931.878	12.605	9.59879	0.465909	0.354792
200	661.613	817.019	13.4543	4.1508	0.4973	0.153422
201	673.637	323.217	0.156819	-7.86976	0.00579634	-0.290883
202	662.197	200.322	-10.0942	4.58697	-0.373103	0.169544
204	702.008	702.081	-4.32294	10.0029	-0.159785	0.369727
205	693.113	888.154	2.70332	-8.77684	0.0999203	-0.32441
206	707.008	1146.88	0.141884	16.9452	0.00524434	0.626331
207	693.867	1364.58	-8.04277	-15.3389	-0.297278	-0.566957
208	695.421	561.569	3.4311	3.59501	0.126821	0.132879
209	695.222	631.043	-3.46757	-1.58316	-0.128169	-0.058517
210	679.855	750.585	-0.0067885	4.12556	-0.000250917	0.152489
211	713.645	1449.15	1.52974	-6.96134	0.0565424	-0.257306
212	704.101	483.309	4.34345	12.5707	0.160543	0.464639
213	689.201	983.783	30.0945	-27.8247	1.11236	-1.02846
214	710.879	1526.05	-2.60977	-6.11304	-0.0964625	-0.225951
215	703.849	1255.62	-31.5212	16.5537	-1.16509	0.611859
216	724.478	197.789	-14.9351	-4.8972	-0.552031	-0.181011
217	741.46	1069.53	1.45894	-12.0459	0.0539256	-0.445242
218	756.992	766.504	-46.6407	-10.0124	-1.72394	-0.37008
219	741.595	808.863	-18.7207	-1.51697	-0.691958	-0.0560705
220	738.374	69.6365	-12.581	-2.7439	-0.46502	-0.10142
221	758.856	1334.4	22.572	22.7666	0.834309	0.841501
222	745.168	1009.27	-22.2476	-5.61659	-0.822317	-0.207601
223	779.506	282.253	-3.41943	-5.23731	-0.126389	-0.193582
224	766.395	1221.57	-12.9327	6.5691	-0.478019	0.242808
225	762.709	376.942	6.68403	-23.9249	0.247056	-0.884315
226	763.825	840.244	6.13236	-15.3613	0.226665	-0.567785
227	767.032	524.121	22.1955	2.33592	0.820393	0.0863405
228	770.629	336.387	11.9086	3.51445	0.440167	0.129901
229	766.574	640.487	5.0765	-9.43955	0.187638	-0.348906
230	796.354	677.513	0.125415	-20.068	0.00463561	-0.741757
231	776.227	1296.25	0.562115	14.3661	0.020777	0.531002
232	777.315	950.712	-1.03375	-6.53193	-0.0382097	-0.241434
233	783.616	426.21	4.85389	9.69307	0.17941	0.358276
234	757.127	898.313	-1.62453	22.4983	-0.0600461	0.831583
235	795.137	1395.44	-0.236852	9.58687	-0.00875456	0.354351
236	798.975	140.227	4.28653	-20.8418	0.158439	-0.770355
237	771.869	578.973	-1.69234	0.383098	-0.0625525	0.0141601
239	784.873	1484.36	0.138887	3.51217	0.00513355	0.129817
241	799.216	213.511	-18.4044	-11.2819	-0.680264	-0.417001
242	802.883	1139.65	-17.2439	-17.3699	-0.637369	-0.642027
243	822.868	850.957	3.1101	-14.6867	0.114956	-0.54285
244	802.969	482.103	-14.7426	-6.0134	-0.544919	-0.222268
245	807.72	724.545	1.74403	-1.59496	0.064463	-0.058953
246	825.184	1075.47	6.23085	-8.64719	0.230306	-0.319619
247	796.45	78.081	4.93816	12.5936	0.182525	0.465487
248	828.464	1008.28	15.8533	-3.76625	0.58597	-0.139209
249	817.49	1188.23	5.5324	69.4371	0.204489	2.56654
250	834.394	620.239	-0.993704	6.43155	-0.0367294	0.237724
251	838.343	1264.06	-7.80248	8.78823	-0.288396	0.324831
252	836.962	901.951	-9.1363	-6.97661	-0.337697	-0.25787
253	831.764	1537.43	2.72746	-5.52426	0.100813	-0.204188
254	857.5	770.274	7.30477	0.588297	0.27	0.0217447
255	865.957	80.6968	10.5844	-23.9191	0.39122	-0.8841
256	848.363	536.255	-7.05002	-13.4374	-0.260584	-0.496673
257	842.751	1456.63	-13.4686	0.41788	-0.497829	0.0154457
258	856.476	249.287	4.53198	-17.4801	0.167512	-0.646102
259	864.205	1335.48	19.0988	-4.61456	0.705931	-0.170564
260	878.742	817.674	-23.3166	-18.0473	-0.861831	-0.667067
261	874.801	337.428	-15.4088	15.7581	-0.569541	0.582452
262	904.125	1225.1	17.0622	38.2211	0.630654	1.41273
263	881.351	423.594	-23.8332	5.72041	-0.880925	0.211438
264	894.187	944.901	-8.97852	-26.5982	-0.331865	-0.983127
266	882.527	1165.52	-3.34782	-5.12751	-0.123743	-0.189523
267	876.377	714.527	5.25751	10.7111	0.194329	0.395905
268	912.166	1381.21	-12.9243	-6.74637	-0.477711	-0.24936
269	891.786	164.263	-9.07632	-3.51553	-0.33548	-0.129942
270	925.152	579.384	-4.75134	-6.36712	-0.175619	-0.235342
271	938.412	485.008	6.44516	2.20621	0.238227	0.0815461
272	909.419	519.244	15.151	-1.7454	0.560014	-0.0645138
273	882.072	1478.72	4.15213	-12.7469	0.153472	-0.471152
275	904.853	1094.7	1.44693	-5.19254	0.0534817	-0.191927
276	911.849	1291.57	-5.80467	-1.66992	-0.214553	-0.0617236
277	915.346	1524.36	-20.7733	-8.97577	-0.767827	-0.331763
278	924.009	240.337	-1.66266	2.20571	-0.0614554	0.0815277
279	910.397	883.079	-1.46373	12.5344	-0.0541024	0.4633
280	912.478	1002.41	29.2843	-2.08319	1.08241	-0.0769993
281	915.589	653.449	5.04299	17.077	0.1864	0.631203
282	960.467	1046.92	14.0825	-20.2385	0.52052	-0.748058
284	933.517	389.54	-4.33366	36.6557	-0.160181	1.35487
285	941.369	1133.36	-30.2925	-13.7732	-1.11967	-0.509086
286	946.792	754.694	17.211	1.1072	0.636154	0.0409244
288	947.081	117.835	3.59652	11.0265	0.132935	0.407562
289	962.702	855.706	-20.1721	12.0153	-0.745604	0.444112
290	953.946	1449.07	6.34454	1.53503	0.234507	0.056738
291	953.143	709.443	1.30509	-15.3996	0.0482388	-0.569202
292	958.526	1556.21	-8.16066	-12.462	-0.301635	-0.460621
293	957.581	806.827	-2.64798	-9.99005	-0.0978748	-0.369253
294	964.046	334.436	19.0632	3.42169	0.704615	0.126473
295	975.918	1192.33	7.75308	23.3957	0.28657	0.864756
296	981.851	974.346	5.33902	-13.1688	0.197342	-0.486747
297	997.872	200.214	-19.1062	7.11555	-0.706207	0.263006
298	984.128	907.75	2.19777	5.28519	0.0812344	0.195352
299	1000.55	453.249	-5.2318	12.0141	-0.193378	0.444065
300	981.768	636.262	-18.9601	6.33449	-0.700805	0.234136
301	983.196	1274.74	0.242555	3.07944	0.00896535	0.113823
302	1001.68	1328.97	16.8132	1.12274	0.621453	0.041499
303	994.615	1401.09	7.51265	10.6363	0.277683	0.393142
304	1020.73	259.87	1.07849	-9.87618	0.0398631	-0.365045
306	1048.89	427.276	3.83247	-5.6669	0.141656	-0.20946
308	1022.58	536.333	12.2172	18.0683	0.451574	0.667841
309	1024.65	1132.31	-2.5259	14.7508	-0.0933627	0.545221
310	1005.25	91.4268	9.25634	-2.79442	0.342134	-0.103288
311	1011.32	1517.87	22.164	-2.35211	0.819228	-0.0869388
312	1024.07	798.513	-5.62192	-6.37443	-0.207798	-0.235612
313	1099.25	187.209	-33.1988	11.1902	-1.2271	0.413613
314	1049.87	129.357	14.1664	-2.16559	0.52362	-0.0800448
315	1053.9	314.662	5.84668	-6.89866	0.216106	-0.254989
316	1049.32	602.446	10.2715	-6.45605	0.379656	-0.238629
317	1029.02	710.96	-8.86455	-13.5373	-0.327652	-0.500369
318	1074.5	50.7276	-4.09035	9.66986	-0.151188	0.357418
319	1059.51	1076.88	-4.67391	-17.3994	-0.172758	-0.64312
320	1054.69	665.455	16.7114	-3.91503	0.61769	-0.144708
321	1028.44	754.764	-14.1213	57.5003	-0.521954	2.12533
322	1047.42	854.733	8.54577	-27.5312	0.31587	-1.01761
323	1039.76	944.138	0.123038	-2.72559	0.00454775	-0.100743
324	1058.08	1266.31	14.5206	21.6818	0.536712	0.801404
325	1046.39	1195.21	16.5948	-14.3582	0.613379	-0.530709
326	1054.62	1427.99	-2.29882	16.4553	-0.0849694	0.608224
327	1070.44	382.925	11.2957	12.3497	0.417512	0.45647
328	1066.13	1003.72	3.62085	-9.84249	0.133834	-0.363799
329	1070.61	901.593	6.02843	3.31684	0.222823	0.122598
331	1106.42	493.039	-3.08796	7.90186	-0.114138	0.29207
332	1064.76	1367.64	4.13655	15.7104	0.152895	0.58069
333	1088.84	1459.4	20.9553	3.55358	0.774551	0.131348
334	1103.87	1219.68	-7.19661	13.1429	-0.266002	0.485791
335	1091.61	1319.2	-12.6592	8.99686	-0.467911	0.332543
336	1080.55	1527.26	1.41542	0.292449	0.0523171	0.0108095
337	1079.91	785.542	-6.35085	24.3957	-0.234741	0.901717
338	1119.75	748.79	-5.47058	-10.4203	-0.202204	-0.385156
340	1122.39	833.648	4.86422	6.93431	0.179792	0.256307
341	1112.76	555.47	6.61128	-16.4016	0.244367	-0.606237
342	1124.79	947.769	12.0869	9.38194	0.446756	0.346776
343	1129.78	700.056	-15.0505	7.97336	-0.556297	0.294712
346	1136.23	1161.25	9.88538	24.433	0.365385	0.903096
347	1170.11	1113.33	-4.96471	22.4845	-0.183506	0.831074
348	1136.44	631.152	-2.18719	-13.5415	-0.0808432	-0.500522
349	1164.89	1026.35	-24.3687	11.6164	-0.900719	0.429368
350	1176.67	116.8	-0.305991	0.738226	-0.0113101	0.0272864
351	1181.2	263.736	17.9945	23.6295	0.665115	0.873397
352	1141.03	301.042	-3.36816	-1.51774	-0.124494	-0.056099
353	1160.03	359.324	9.43058	-27.4793	0.348574	-1.01569
354	1156.68	1369.46	-14.7278	7.67319	-0.544369	0.283617
355	1131.05	908.064	10.9834	-32.1898	0.405969	-1.1898
356	1149.52	1538.34	-12.3853	-9.051	-0.457788	-0.334544
357	1138.61	1483.92	-15.8824	26.0289	-0.587047	0.962085
358	1191.45	970.748	39.4649	19.8327	1.4587	0.733059
359	1153.72	1289.42	14.1772	44.3245	0.524018	1.63833
360	1230.28	474.539	-11.2072	12.6349	-0.414242	0.467012
361	1170.58	887.415	42.0496	-17.9084	1.55424	-0.661933
362	1233.83	412.807	-0.321152	-7.19217	-0.0118705	-0.265838
363	1177.1	218.133	18.0568	-0.679953	0.667416	-0.0251325
364	1211.07	1068.17	-3.73602	-5.33858	-0.138091	-0.197325
367	1182.59	527.504	34.0664	4.08931	1.25917	0.151149
368	1231.52	573.415	9.50506	4.22633	0.351327	0.156214
369	1195.9	1234.28	-12.8535	-7.59528	-0.475093	-0.280737
370	1193.06	786.849	-2.05019	-11.69	-0.0757792	-0.432089
371	1214.21	1461.97	4.53973	-4.53173	0.167798	-0.167502
372	1218.05	1415.47	10.5175	-2.34668	0.388749	-0.0867384
373	1239.97	724.355	-14.1567	3.92316	-0.523262	0.145008
374	1209.54	854.855	-15.5518	-17.4766	-0.574827	-0.645972
375	1214.02	643.167	-3.61543	6.34311	-0.133634	0.234455
376	1229.16	691.131	1.39993	19.2812	0.0517444	0.712672
377	1227.32	912.727	-11.5566	-4.50011	-0.427156	-0.166333
378	1260.31	338.089	15.5958	8.73746	0.576452	0.322955
379	1240.53	1184.98	6.47249	7.10029	0.239237	0.262442
381	1270.03	767.686	-14.6455	19.2341	-0.541328	0.710932
382	1251.01	178.954	17.7508	-11.832	0.656105	-0.437337
383	1263.4	1273.59	-13.8073	3.47316	-0.510347	0.128375
384	1229.7	1360.78	-20.496	7.92944	-0.757575	0.293089
385	1261.69	1323.65	16.3221	-21.0158	0.603299	-0.776789
386	1287.33	245.264	8.62652	8.93299	0.318854	0.330182
387	1264.7	1133.96	9.46043	-11.9533	0.349677	-0.441818
388	1273.82	857.195	-5.38051	6.8394	-0.198875	0.252799
389	1302.89	1031.86	6.91856	14.259	0.255725	0.527042
390	1285.57	636.736	-13.7366	15.3578	-0.507733	0.567656
391	1279.16	815.528	12.369	-11.7549	0.457186	-0.434488
392	1293.04	969.362	22.3678	8.58163	0.826762	0.317195
393	1308.32	303.436	3.68357	10.9926	0.136153	0.40631
395	1304.96	94.3684	20.7938	-12.9974	0.768583	-0.480411
396	1293.34	927.599	16.0421	-2.76509	0.59295	-0.102203
397	1320.28	1095.33	-24.3297	10.6103	-0.899275	0.392179
398	1283.56	1385.08	21.7611	-8.68706	0.804335	-0.321092
399	1298.92	1501.77	-7.41097	20.0436	-0.273925	0.740853
400	1307.65	385.788	11.999	-18.4385	0.443508	-0.681525
401	1327.82	155.879	22.2615	-12.8717	0.822832	-0.475766
402	1333.21	1404.9	4.85946	14.6642	0.179616	0.542018
403	1330.06	1228.9	-10.145	-8.74281	-0.374981	-0.323153
404	1340.26	721.268	20.458	28.4517	0.756171	1.05163
405	1330.69	1169.76	-11.2586	-10.2483	-0.416142	-0.3788
407	1347.05	877.337	-19.2868	-15.0482	-0.712881	-0.556213
409	1346.21	1463.68	5.94113	-4.14936	0.219597	-0.153369
410	1354.31	637.751	8.31236	11.0759	0.307242	0.409389
411	1352.16	1313.53	9.82125	-3.67377	0.363014	-0.13579
412	1366.61	1355.47	-2.75503	10.2656	-0.101832	0.379439
413	1348.28	817.115	-10.4037	28.2596	-0.384543	1.04453
414	1394.12	162.765	-30.6229	-3.62002	-1.13189	-0.133804
415	1367.12	931.616	-8.60337	7.30459	-0.317999	0.269993
416	1360.49	417.424	1.12957	2.29949	0.0417512	0.0849942
418	1395.38	783.731	-13.5142	11.9932	-0.499513	0.443295
419	1397.57	1280.34	-9.45199	12.7342	-0.349365	0.470682
420	1397.27	1013.39	16.5427	-23.3219	0.611452	-0.862026
421	1381	257.775	-9.09646	2.03318	-0.336224	0.0751506
422	1391.96	326.243	12.1492	18.0294	0.449061	0.666403
423	1407.41	1144.06	15.0656	17.818	0.556856	0.658591
424	1411.1	1410.23	14.0783	12.5985	0.520365	0.465666
425	1428.16	854.135	-5.59552	0.695841	-0.206822	0.0257197
427	1424	1231.94	-18.8417	11.755	-0.69643	0.434491
428	1420.82	1465.44	26.5698	9.22256	0.982074	0.340885
431	1431.97	234.846	10.6767	14.0109	0.394635	0.517873
432	1435.75	933.05	-6.18565	8.55038	-0.228635	0.31604
19	40.2894	868.096	-8.79361	-0.126719	-0.196254	-0.00282809		0.032365	141.632
20	51.8053	1089.77	-8.9847	11.6835	-0.200518	0.26075
21	57.2637	171.255	-5.55798	10.5749	-0.124042	0.236007
22	82.1301	509.633	0.191394	-10.8713	0.00427149	-0.242622
23	61.3602	663.526	-10.4718	3.07183	-0.233706	0.0685563
24	69.0344	712.02	8.66025	4.63098	0.193277	0.103353
25	82.7463	905.842	2.87921	-1.61352	0.0642575	-0.0360102
26	69.4451	331.488	14.8482	10.7733	0.331379	0.240436
28	74.065	257.436	-2.9001	-16.6965	-0.0647237	-0.372629
29	96.6343	607.674	-3.83283	-7.98998	-0.0855402	-0.178318
30	89.7236	1151.05	-18.1029	17.258	-0.404017	0.38516
31	91.4489	766.375	-7.36366	-10.5493	-0.16434	-0.235437
32	91.3461	989.723	4.28428	-2.08739	0.0956155	-0.0465859
33	101.928	65.435	-14.5488	17.7965	-0.324697	0.397177
34	115.888	148.209	-9.48376	14.9458	-0.211656	0.333557
35	101.015	827.348	0.811885	18.476	0.0181194	0.412343
36	116.028	368.222	7.95744	-6.03907	0.177592	-0.134778
38	107.449	539.933	19.4328	14.0739	0.433697	0.314099
39	122.687	285.296	-0.499222	-18.3262	-0.0111415	-0.409
40	137.805	1043.39	1.91876	2.91135	0.0428224	0.0649748
41	145.719	1116.67	5.00478	16.8836	0.111695	0.376803
43	119.55	669.435	-12.6152	-1.54147	-0.281543	-0.0344022
44	161.538	221.457	-4.15514	18.3524	-0.0927333	0.409583
45	142.744	917.832	-7.17755	-1.7893	-0.160187	-0.0399332
46	153.71	699.527	3.79427	-3.9754	0.0846796	-0.088722
47	162.577	126.664	-10.1102	-0.985074	-0.225638	-0.0219846
48	143.613	984.409	-7.0536	25.0698	-0.15742	0.559502
49	171.146	754.97	3.78814	-1.07929	0.0845428	-0.0240873
50	168.679	392.465	-27.0568	-32.3332	-0.603847	-0.721603
51	154.237	509.666	-16.3721	-10.3327	-0.365388	-0.230603
52	168.53	573.131	11.1179	2.50587	0.248126	0.0559253
53	164.518	839.953	25.7119	-1.23214	0.573831	-0.0274986
54	184.881	623.893	31.2222	13.6859	0.696809	0.305439
55	177.992	75.3252	-16.5069	-14.3172	-0.368398	-0.319528
58	196.779	295.064	-1.93848	11.2805	-0.0432625	0.251756
59	201.059	944.464	10.5237	-2.94925	0.234865	-0.0658205
60	202.934	998.225	6.36603	3.09439	0.142075	0.0690597
61	204.822	873.855	-18.411	24.9437	-0.410893	0.556687
62	207.386	500.888	7.85234	9.20768	0.175247	0.205495
63	218.546	408.397	-22.8658	4.98235	-0.510312	0.111195
64	220.764	791.732	-3.64639	2.33464	-0.0813791	0.0521039
65	234.353	1117.05	-8.0733	-4.05934	-0.180178	-0.0905954
66	233.802	1049.36	10.3024	12.1447	0.229926	0.271042
67	233.424	152.108	-14.3076	6.61208	-0.319314	0.147567
68	232.425	321.107	19.4359	-15.6932	0.433765	-0.350236
69	256.497	653.304	-1.67853	31.5198	-0.037461	0.703452
70	238.324	565.443	-8.87929	-14.9816	-0.198166	-0.334355
71	250.303	224.559	-14.2825	0.355746	-0.318753	0.00793945
72	257.116	472.521	-28.0546	23.7095	-0.626116	0.529143
73	256.234	67.2492	12.8558	15.2341	0.286912	0.339992
74	272.034	724.886	5.35611	-2.93514	0.119536	-0.0655057
75	247.528	910.916	-8.92449	2.71177	-0.199175	0.0605207
76	266.24	112.862	10.8681	-11.4292	0.242552	-0.255075
77	267.656	837.273	6.54891	14.7502	0.146157	0.329191
79	264.815	361.191	-2.69974	4.81081	-0.0602521	0.107366
80	273.853	974.178	9.58053	13.2812	0.213816	0.296406
81	305.556	599.971	-1.53857	0.66838	-0.0343374	0.0149167
83	292.816	411.811	-7.40394	-7.38031	-0.165239	-0.164712
84	311.928	1134.15	12.2612	4.6455	0.273642	0.103677
85	285.953	318.924	-7.69936	0.269911	-0.171832	0.0060238
86	299.11	529.998	25.2412	27.8306	0.563328	0.621116
87	307.827	897.279	-22.3077	7.28791	-0.497858	0.16265
88	310.301	1044.85	-1.46093	-0.800967	-0.0326047	-0.0178758
89	325.111	781.924	3.54881	3.07413	0.0792014	0.0686076
90	305.817	240.074	-2.71433	-5.40836	-0.0605777	-0.120702
91	310.641	185.956	-5.0901	-15.6832	-0.113599	-0.350014
93	338.235	119.469	-9.29389	-12.1479	-0.207419	-0.271113
94	334.024	446.596	-1.14139	-25.785	-0.0254732	-0.575464
95	372.101	944.819	3.25991	-7.23071	0.0727538	-0.161373
97	329.672	319.241	3.17931	-0.512799	0.0709551	-0.0114445
98	349.783	660.653	11.0614	-0.582968	0.246865	-0.0130105
99	385.474	387.659	22.5414	-7.84038	0.503074	-0.17498
100	370.711	257.437	10.2708	-14.5725	0.229222	-0.325224
101	356.154	546.237	0.0211338	4.30244	0.00047166	0.0960209
102	378.647	836.35	-17.8021	17.5102	-0.397303	0.390788
104	385.623	995.715	17.6548	11.867	0.394015	0.264844
106	375.959	182.703	10.9886	-20.5524	0.24524	-0.458684
107	395.51	710.976	-10.0075	3.35764	-0.223345	0.0749349
108	368.668	1062.9	-1.60732	-15.2614	-0.0358718	-0.3406
109	386.237	887.651	5.45212	-1.88106	0.121679	-0.041981
110	396.825	483.438	-6.23948	-6.13963	-0.139251	-0.137023
111	385.526	1135.49	27.0841	6.87441	0.604455	0.153421
112	410.71	579.881	5.91039	-21.0078	0.131907	-0.468847
113	410.179	327.261	-11.5565	10.7928	-0.257914	0.24087
114	407.442	783.216	25.6546	-25.4657	0.572552	-0.568338
115	425.554	108.588	18.1039	15.2304	0.404039	0.339909
116	420.874	1084.94	-4.38063	11.9796	-0.0977657	0.267359
119	427.906	1034.39	-7.62211	2.45366	-0.170108	0.0547601
120	442.726	462.1	11.3579	9.10967	0.253483	0.203307
121	450.706	185.266	-5.53482	-0.225852	-0.123525	-0.0050405
122	471.807	871.235	2.34887	-3.83105	0.0524214	-0.0855003
123	437.218	268.759	-7.19164	8.48909	-0.160501	0.189457
124	473.591	806.976	3.25775	5.74907	0.0727056	0.128306
125	477.109	940.427	-0.171479	-4.72886	-0.00382702	-0.105537
126	481.444	642.062	-7.47513	-6.71589	-0.166828	-0.149884
127	455.224	1121.13	14.6898	-28.8965	0.327844	-0.644906
128	438.894	1200.53	0.990969	0.951858	0.0221162	0.0212433
129	458.463	720.795	-0.944186	3.73612	-0.0210721	0.0833817
130	480.539	367.808	11.3605	-4.796	0.25354	-0.107036
132	497.188	1005.83	-21.0403	3.59877	-0.469573	0.0803163
133	494.394	448.314	10.8935	-1.98794	0.243119	-0.0443664
134	480.514	278.092	-22.5481	0.553988	-0.503223	0.0123638
135	501.801	548.799	22.0567	-0.743997	0.492255	-0.0166043
136	497.083	1144.29	1.98243	-8.00393	0.0442433	-0.17863
138	509.006	742.609	19.4729	-17.1513	0.434592	-0.382778
140	507.659	216.56	13.4275	-12.1683	0.299671	-0.271568
141	518.221	1073.92	-9.64079	22.4308	-0.215161	0.500604
142	491.326	99.242	0.495699	-25.7587	0.0110629	-0.574875
143	522.545	129.469	-28.9233	25.3552	-0.645502	0.565871
144	566.396	517.302	-17.8381	3.3008	-0.398107	0.0736664
145	545.806	298.564	-7.71102	11.3884	-0.172092	0.254163
146	556.471	865.585	-29.1575	-1.30576	-0.65073	-0.0291417
147	550.12	196.804	-4.90042	-11.1961	-0.109366	-0.249872
148	560.709	68.8846	19.4328	2.23675	0.433696	0.0499192
149	568.081	376.138	-20.8288	-9.50547	-0.464852	-0.212141
150	562.984	444.658	-20.0666	-3.35523	-0.44784	-0.0748812
151	561.659	630.913	-17.6557	12.3095	-0.394036	0.274721
152	574.549	767.868	-19.264	-14.3054	-0.429928	-0.319265
153	564.789	976.737	5.56587	-5.94375	0.124218	-0.132651
154	553.838	1126.75	-4.05479	6.45163	-0.0904937	0.143986
155	591.325	906.208	21.5785	20.1598	0.481584	0.449922
156	590.542	1028.56	-5.80706	-4.4347	-0.1296	-0.0989725
157	595.753	126.761	-5.59614	-14.538	-0.124893	-0.324455
158	615.697	686.705	-17.7704	3.1747	-0.396595	0.0708522
160	599.75	1111.54	-2.76522	1.55849	-0.0617134	0.034782
162	603.34	204.961	15.6212	-8.60043	0.348629	-0.191942
163	603.613	277.356	-25.1735	11.7627	-0.561815	0.262516
164	609.314	591.43	-5.99143	15.6658	-0.133715	0.349625
165	635.173	334.267	31.4006	-50.8136	0.70079	-1.13404
166	623.452	962.667	5.95716	-8.68559	0.13295	-0.193843
167	636.465	470.911	-22.5419	-12.5853	-0.503084	-0.280875
168	634.614	800.827	15.8045	15.2267	0.35272	0.339826
170	638.693	549.832	-4.05531	12.4167	-0.0905054	0.277113
171	662.718	395.455	-6.37935	-17.3418	-0.142373	-0.387031
173	655.129	1048.83	-5.84382	6.79038	-0.130421	0.151546
174	656.146	124.835	-23.3109	-3.9782	-0.520246	-0.0887845
175	670.795	257.901	-11.92	-6.79011	-0.266027	-0.15154
176	654.027	1134.04	-6.575	-3.35932	-0.146739	-0.0749725
177	649.924	867.551	1.26506	-18.8151	0.0282332	-0.419911
178	684.324	187.198	7.07311	0.366159	0.157856	0.00817184
179	684.818	760.65	-28.9058	-6.03524	-0.645112	-0.134693
180	672.176	630.9	25.2918	28.3386	0.564457	0.632453
181	673.813	923.965	7.97595	-9.43151	0.178005	-0.21049
182	681.057	992.275	9.0949	4.11439	0.202978	0.0918238
183	706.745	562.705	-2.20045	-4.83147	-0.0491091	-0.107828
184	719.082	313.542	26.6074	1.70154	0.593818	0.0379745
185	711.221	87.9011	21.9475	0.800368	0.489819	0.0178624
186	709.156	860.224	16.57	-9.17278	0.369805	-0.204716
187	711.751	450.525	-3.53986	-5.5939	-0.0790016	-0.124843
188	718.086	1154.94	-6.47048	-0.976858	-0.144407	-0.0218013
189	720.451	512.338	2.65719	-1.1816	0.0593026	-0.0263708
190	704.935	1086.59	23.3341	4.80889	0.520764	0.107324
191	730.686	42.5949	-8.45137	7.35521	-0.188616	0.164152
192	714.745	133.009	-23.9075	-6.8359	-0.533562	-0.152562
193	749.874	761.512	6.32049	15.729	0.141059	0.351037
194	755.108	1052.42	2.14721	14.0603	0.0479208	0.313794
195	744.573	654.3	29.4102	33.4847	0.65637	0.747303
196	745.018	948.438	-7.79984	-1.25757	-0.174075	-0.0280662
198	750.53	373.742	-4.58268	9.94794	-0.102275	0.222016
199	745.957	231.652	20.5142	-17.0596	0.457831	-0.380732
201	765.868	159.482	16.9284	32.3534	0.377803	0.722056
202	813.839	1117.33	-1.23832	10.9452	-0.0276365	0.244273
203	793.822	886.999	8.31727	9.2522	0.185623	0.206488
205	783.379	452.348	-18.3828	13.4606	-0.410263	0.300411
206	795.174	1001.5	3.79697	9.65079	0.0847398	0.215384
207	786.895	536.609	-10.8842	7.86769	-0.24291	0.175589
208	806.73	816.477	-14.4047	14.1656	-0.32148	0.316144
209	787.856	91.6748	28.5784	25.7723	0.637805	0.575179
210	812.968	289.611	-20.0241	-3.08973	-0.446892	-0.0689557
212	802.047	647.402	0.0122182	-6.89248	0.000272683	-0.153825
213	815.296	368.835	-5.05531	13.1522	-0.112823	0.293528
214	820.446	201.14	29.8705	1.83174	0.666642	0.0408803
215	830.772	723.904	-2.00077	-7.48185	-0.0446527	-0.166978
216	860.591	940.352	11.7586	4.106	0.262426	0.0916366
217	843.111	603.08	-1.14018	11.5457	-0.0254463	0.257674
220	868.435	144.94	-31.1381	-20.8223	-0.694932	-0.464707
221	852.429	472.391	-6.77933	18.934	-0.151299	0.422565
222	877.086	76	-19.2246	40.9135	-0.42905	0.913097
223	875.628	1029.31	-3.96949	8.37975	-0.0885901	0.187017
224	893.541	554.234	-3.14547	24.5711	-0.0701997	0.548371
225	888.169	857.984	19.2733	-0.174877	0.430137	-0.00390285
226	884.535	383.504	-23.2423	2.32488	-0.518716	0.0518861
227	898.521	786.562	1.16157	2.59272	0.0259236	0.0578637
228	895.509	242.429	-20.5869	-3.75573	-0.459452	-0.0838195
229	883.276	707.341	7.2726	5.30973	0.162308	0.118501
230	896.548	325.81	-6.54833	15.6621	-0.146144	0.349542
231	899.327	650.289	17.355	9.16141	0.387325	0.204462
232	895.196	1095.36	-4.08263	15.0316	-0.0911152	0.335472
234	918.232	468.813	1.0469	6.82259	0.0233645	0.152265
235	940.964	1130.57	14.9635	18.6417	0.333952	0.416041
236	931.196	150.648	10.8101	21.0193	0.241258	0.469103
237	937.939	736.116	21.6096	19.0259	0.482277	0.424615
238	950.276	1000.81	-4.46559	10.598	-0.099662	0.236524
240	958.526	410.023	-9.73985	-17.1776	-0.217371	-0.383364
241	956.175	603.061	0.288962	-1.38685	0.00644898	-0.0309513
242	961.893	934.092	29.7762	5.32322	0.664538	0.118802
243	955.151	673.071	15.3046	-1.24901	0.341565	-0.027875
244	956.763	80.7266	1.71277	24.1201	0.0382251	0.538305
245	967.493	320.449	25.7144	-11.4493	0.573888	-0.255522
246	952.344	1059.85	14.5332	-0.173901	0.324347	-0.00388109
247	947.508	839.308	5.94682	-9.96545	0.13272	-0.222406
248	961.226	522.659	5.11827	-4.2051	0.114228	-0.0938484
249	981.402	885.585	4.05512	31.781	0.0905012	0.709279
250	953.277	239.084	23.7621	18.7883	0.530318	0.419312
252	973.438	799.877	-8.38623	3.40109	-0.187162	0.0759047
253	987.268	230.477	3.59558	5.80642	0.0802453	0.129586
254	1000.01	477.591	-2.54399	-0.700937	-0.0567762	-0.0156433
255	1005.56	752.118	14.1357	21.9821	0.315477	0.490592
257	1011.42	1111.64	4.16265	-8.57128	0.092901	-0.191292
258	1023.23	835.883	9.9155	3.41041	0.221292	0.0761127
259	1014.64	631.735	-2.10437	-11.048	-0.0469648	-0.246565
260	1008.14	139.432	2.85505	-13.129	0.0637183	-0.29301
261	1007.5	691.873	6.4183	-6.37457	0.143242	-0.142266
262	1013.31	560.317	14.2545	2.55169	0.318129	0.0569479
263	1007.1	71.0501	-3.87356	16.3107	-0.0864491	0.364017
264	1012.71	181.359	17.4536	15.5979	0.389526	0.348111
265	1041.3	1038.41	14.8735	-5.9115	0.331944	-0.131931
266	1027.84	386.234	4.65284	36.6636	0.103841	0.818248
267	1045.73	959.91	18.2527	-0.196736	0.407359	-0.00439071
268	1032.32	274.912	1.51048	-15.8398	0.0337105	-0.353508
271	1028.83	228.665	-0.997091	9.45423	-0.0222528	0.210997
272	1057.95	877.192	-5.2246	-18.3711	-0.116601	-0.410001
273	1052.65	451.759	-40.0427	21.9581	-0.893663	0.490054
274	1060.1	349.707	-5.47967	8.45009	-0.122294	0.188587
275	1065.11	182.431	6.14053	-1.71096	0.137043	-0.0381847
276	1061.46	705.486	19.0146	3.47614	0.424363	0.0775796
277	1062.58	593.987	-0.270584	22.5704	-0.00603883	0.503721
278	1073.81	110.63	7.90605	-8.79116	0.176445	-0.196199
279	1078.06	516.75	8.45245	4.86694	0.18864	0.108619
280	1086.62	291.785	-10.8023	15.0574	-0.241082	0.336047
281	1098.85	654.307	-8.27759	10.0174	-0.184737	0.223565
282	1094.8	740.162	2.54024	-17.0252	0.0566924	-0.379963
283	1089.68	795.713	-7.36428	5.69443	-0.164354	0.127087
284	1102.61	902.769	-6.35292	1.74924	-0.141783	0.039039
286	1106.74	1123.2	1.67799	11.0579	0.0374489	0.246788
287	1105.11	567.444	-9.37908	7.02346	-0.20932	0.156748
288	1111.01	437.897	-14.6742	-13.1658	-0.327496	-0.293832
289	1088.09	225.682	-0.43321	-15.0983	-0.00966828	-0.33696
291	1108.84	352.83	-5.93872	-20.1304	-0.132539	-0.449266
292	1148.56	997.969	-11.0723	3.8387	-0.247109	0.0856711
293	1118.29	74.905	9.63756	5.68382	0.215089	0.12685
294	1145.94	1065.05	-8.39448	6.1834	-0.187346	0.137999
295	1133.69	233.131	-6.18295	-8.48138	-0.13799	-0.189285
296	1145.75	150.61	-11.0141	-4.77771	-0.24581	-0.106628
297	1149.57	840.594	10.8753	0.563401	0.242712	0.0125738
298	1147.74	939.985	-7.96075	-23.728	-0.177666	-0.529554
299	1152.19	620.843	6.95346	-29.4181	0.155186	-0.656546
300	1155.95	383.633	-4.35443	-4.10855	-0.097181	-0.0916937
301	1154.4	726.719	-10.4774	16.0559	-0.233831	0.358331
302	1161.84	539.168	-7.61651	-9.44972	-0.169983	-0.210896
303	1166.46	328.444	31.1657	-15.7387	0.695549	-0.351253
304	1180.38	459.246	1.96242	3.52588	0.0437967	0.0786898
305	1192.7	268.865	-8.54207	-1.44881	-0.19064	-0.0323342
306	1179.68	779.304	-15.6497	13.6852	-0.349265	0.305423
307	1174.77	48.3086	2.16082	38.026	0.0482246	0.848654
308	1181.86	1147.27	15.1	-31.4831	0.336999	-0.702632
310	1205.65	907.017	3.0489	-10.1316	0.0680446	-0.226114
311	1219.68	93.8045	-34.2027	1.83069	-0.763326	0.0408568
312	1213.77	658.365	-14.5333	-0.693719	-0.32435	-0.0154822
314	1263.74	182.62	-7.69429	2.57883	-0.171719	0.0575537
315	1212.68	592.795	11.4503	-33.0023	0.255545	-0.736538
316	1216.17	208.296	-21.3533	8.08301	-0.476559	0.180395
318	1231.78	377.365	-6.5464	7.00825	-0.146101	0.156408
319	1231.53	720.481	-15.4071	3.36937	-0.343851	0.0751967
320	1225.69	1073.18	-24.676	-2.96897	-0.550713	-0.0662608
321	1238.68	501.826	-4.94221	-13.0696	-0.110299	-0.291684
322	1236.61	819.978	7.00667	6.47078	0.156373	0.144413
323	1254.58	983.897	0.840922	-8.458	0.0187675	-0.188763
324	1228.05	38.4336	1.17011	-10.6204	0.0261143	-0.237024
325	1264.08	135.869	23.1918	-9.00005	0.517588	-0.200861
326	1237.77	430.23	-11.033	28.3223	-0.246232	0.63209
327	1245.98	1134.93	23.984	20.243	0.535268	0.451778
330	1251.62	310.364	19.869	3.97875	0.443432	0.0887968
331	1272.69	558.591	13.2886	-21.3381	0.296572	-0.476219
332	1265.99	762.575	29.9024	-1.10501	0.667355	-0.0246613
333	1274.39	249.903	-5.05839	23.2755	-0.112892	0.519457
334	1278.25	883.584	5.21204	7.33335	0.116321	0.163664
335	1278.39	659.195	-16.1544	2.32306	-0.360529	0.0518454
337	1298.94	442.021	17.2286	18.9357	0.384503	0.422603
338	1294.41	1059.97	-5.53083	-4.88661	-0.123436	-0.109058
339	1314.03	316.07	29.9453	-5.12665	0.668311	-0.114415
340	1321.26	604.966	-5.59315	-16.6866	-0.124826	-0.372407
341	1299.61	1132.84	1.80239	-39.502	0.0402252	-0.881597
342	1341.29	691.302	5.73438	0.890188	0.127978	0.019867
343	1332.87	374.809	-0.772801	10.2124	-0.0172472	0.227917
344	1314.97	781.568	3.343	-1.31705	0.0746081	-0.0293936
345	1339.11	503.705	-23.2081	-23.2272	-0.517952	-0.518378
346	1334.73	880.892	19.0114	-6.17514	0.424292	-0.137815
347	1345.22	978.09	3.76948	-12.7423	0.0841263	-0.28438
353	1360.79	774.54	-1.32523	-7.61982	-0.0295761	-0.170057
354	1364.79	426.207	-3.82373	18.511	-0.085337	0.413124

## Sheet: Lp+M21Polarity
25	38.9774	1193.11	24.7792	44.0593	0.527953	0.938739		0.444016	168.701
27	52.9139	616.449	-4.47542	6.14138	-0.0953545	0.13085
28	43.968	52.4005	-3.84922	1.1382	-0.0820125	0.0242507
29	33.0703	832.893	-33.6071	-26.1906	-0.716043	-0.558024
30	58.1781	1047.96	-24.8421	-10.6185	-0.529293	-0.226241
31	66.8963	441.124	67.3556	6.76362	1.4351	0.144107
32	51.3793	1271.03	57.772	45.1604	1.23091	0.9622
34	65.4865	893.973	128.973	49.2178	2.74793	1.04865
35	77.2461	811.397	40.1751	89.443	0.855981	1.9057
36	78.077	1522.35	-23.7054	176.302	-0.505074	3.75634
37	74.2465	1362.3	17.3362	56.8664	0.369369	1.21161
38	87.9377	663.345	18.3109	37.0901	0.390138	0.790253
39	81.509	109.652	2.08783	-12.5056	0.044484	-0.266449
40	75.7475	1125.08	26.0947	53.5837	0.55598	1.14167
41	80.4168	734.896	34.2834	16.3975	0.730453	0.349369
42	99.3861	235.844	-4.83549	20.1693	-0.103026	0.429734
43	85.6562	1620.05	-5.88217	70.0541	-0.125327	1.49259
44	93.6162	1409.67	-16.2241	-53.5928	-0.345675	-1.14186
45	104.09	183.408	-33.49	-11.9599	-0.713547	-0.254821
46	95.2402	977.825	39.3486	-56.5633	0.838371	-1.20515
47	116.22	1298.71	8.52927	113.587	0.181727	2.42012
48	112.504	329.643	-19.4092	55.9254	-0.413538	1.19156
49	123.483	522.876	40.4995	-24.2425	0.862893	-0.516518
50	124.529	1160.89	51.1722	-16.6001	1.09029	-0.353686
51	116.613	1225.98	6.9769	-71.281	0.148652	-1.51873
54	129.346	1483.04	34.4419	43.1178	0.733829	0.91868
55	122.971	443.454	51.9911	10.9201	1.10774	0.232667
56	143.391	880.975	175.976	14.2759	3.7494	0.304166
57	129.577	1064	45.7864	6.99313	0.975538	0.148998
58	122.314	579.94	24.8216	-8.27098	0.528857	-0.176224
59	146.258	1563.59	105.095	83.6656	2.23917	1.7826
60	147.394	119.667	-6.92845	-77.2634	-0.147619	-1.6462
61	149.299	1429.6	-8.07641	24.053	-0.172078	0.51248
62	163.563	386.574	51.5537	56.6253	1.09842	1.20647
63	137.647	795.217	34.3515	-13.1031	0.731902	-0.279177
64	158.913	970.634	64.9772	-6.79512	1.38442	-0.144779
65	146.739	657.711	14.5665	-9.35131	0.310357	-0.199242
66	159.1	608.6	4.85605	-15.6031	0.103464	-0.332443
67	177.632	719.09	26.9165	59.5174	0.573491	1.26809
68	161.605	1352.34	3.50915	45.3059	0.0747669	0.9653
69	182.277	185.823	-6.5821	-18.3928	-0.14024	-0.391882
70	174.674	1232.2	6.4808	22.0345	0.138082	0.469474
71	201.987	269.479	63.0641	-89.5852	1.34366	-1.90873
72	178.203	320.683	18.7036	-24.9951	0.398504	-0.532553
73	190.853	1071.68	68.5568	46.5857	1.46069	0.992568
74	187.722	1598.36	0.212634	-42.773	0.00453044	-0.911333
75	210.055	80.4667	75.5553	1.02801	1.6098	0.021903
77	206.044	473.754	30.0266	-16.2995	0.639755	-0.347282
78	198.187	809.669	-30.5773	-7.02401	-0.651489	-0.149656
79	227.866	1386.68	37.8559	33.4404	0.806569	0.712491
80	213.364	585.093	-5.80835	-6.17561	-0.123754	-0.131579
81	216.797	1161.21	-1.1295	30.7844	-0.0240653	0.6559
82	233.113	1621.5	-29.8686	118.19	-0.636389	2.5182
83	224.342	1457.78	56.543	-4.28711	1.20472	-0.0913422
84	225.674	911.357	124.129	41.3931	2.64473	0.881934
85	227.505	1284.11	-28.1585	-34.44	-0.599952	-0.733787
87	211.833	1214.77	36.3089	2.05759	0.773607	0.0438395
88	248.392	1517.59	93.1697	-56.4463	1.9851	-1.20266
89	246.952	334.278	19.727	-48.152	0.420309	-1.02594
90	244.367	671.784	-18.8599	36.5056	-0.401833	0.777798
91	255.056	171.958	15.0089	-1.00032	0.319783	-0.0213131
92	258.784	792.287	18.7502	-14.0509	0.399496	-0.299372
93	267.377	994.346	89.5887	-33.0793	1.9088	-0.704798
94	267.276	384.311	31.1584	7.37336	0.663871	0.157099
95	266.573	1116.91	26.7117	61.4413	0.569126	1.30909
96	286.736	697.593	-10.9772	93.8617	-0.233884	1.99984
98	282.085	238.753	79.9305	-45.5215	1.70302	-0.969894
100	267.462	470.961	18.1856	6.44272	0.387468	0.13727
101	279.207	575.615	-3.75373	12.3325	-0.079978	0.262759
102	258.202	1328.48	21.2031	-19.1433	0.45176	-0.407873
103	281.622	69.7912	39.8726	14.9314	0.849536	0.318133
104	284.688	1216.08	65.0523	6.14789	1.38602	0.130989
105	298.187	1304.22	-17.4402	-28.0342	-0.371586	-0.597305
106	305.84	870.623	25.2438	-59.6642	0.537852	-1.27122
108	320.556	1403.85	34.7739	7.56931	0.740902	0.161274
109	321.557	1560.66	111.007	58.3742	2.36515	1.24374
110	329.383	396.357	33.3719	-9.90659	0.71103	-0.211072
111	328.159	1062.75	14.9217	-33.0112	0.317925	-0.703347
112	330.92	1473.43	108.931	5.72667	2.32092	0.122014
113	332.405	737.84	8.17176	62.0781	0.17411	1.32265
114	328.364	252.654	63.5574	5.26635	1.35417	0.112206
115	361.228	303.892	-22.4197	-26.7631	-0.477681	-0.570221
116	349.906	1145.29	-5.09421	41.3718	-0.108539	0.881478
117	347.768	77.6566	11.1139	-10.0022	0.236795	-0.21311
118	316.012	160.447	-22.6762	-40.0698	-0.483146	-0.853739
119	337.72	504.307	-15.8811	1.68199	-0.338367	0.035837
120	342.797	605.364	-10.0249	3.44206	-0.213593	0.0733376
121	358.604	980.28	-6.52499	26.5547	-0.139023	0.565781
122	346.035	1254.06	-8.53535	-8.77188	-0.181857	-0.186896
123	381.003	886.927	2.1276	46.6618	0.0453312	0.994189
125	372.235	795.524	15.306	58.1068	0.326113	1.23804
127	374.083	149.589	15.828	1.75224	0.337235	0.0373337
128	384.812	673.189	38.1683	2.16252	0.813224	0.0460753
129	383.802	1318.16	49.74	23.2868	1.05977	0.496155
130	389.175	1204.24	29.5301	18.2611	0.629177	0.389077
131	412.682	205.407	-17.9641	-19.8457	-0.382748	-0.422838
132	401.07	446.108	-39.2573	37.9435	-0.836427	0.808435
133	404.207	1565.28	140.04	27.6036	2.98373	0.58813
134	408.671	1435.3	38.7791	3.07873	0.826239	0.0655963
135	417.188	341.635	16.3673	27.6892	0.348727	0.589954
136	401.342	575.77	-23.106	-32.791	-0.492304	-0.698653
137	443.796	1052.41	20.4083	17.9526	0.434824	0.382503
140	432.386	716.454	63.7408	-31.2562	1.35808	-0.665952
141	431.403	1352.85	33.9383	46.337	0.723099	0.987269
142	413.8	1636.02	8.86042	-17.2426	0.188783	-0.367375
143	430.031	982.566	-38.3517	4.98034	-0.817132	0.106113
144	446.143	1143.94	0.471319	76.7549	0.010042	1.63536
145	437.962	1240.04	-1.90422	51.6624	-0.0405717	1.10073
146	426.018	1506.68	-16.4214	77.1087	-0.349878	1.6429
147	453.893	920.424	151.766	102.339	3.23357	2.18046
148	459.86	261.917	16.0934	16.2182	0.342891	0.345549
149	444.506	102.79	-7.34932	49.0386	-0.156587	1.04483
150	440.943	800.829	63.6103	-17.3123	1.3553	-0.368861
151	456.19	631.31	86.8121	85.5179	1.84964	1.82207
152	483.959	1467.71	-38.6148	9.64611	-0.822737	0.205523
153	464.809	553.132	67.5539	-21.1519	1.43932	-0.450669
154	475.845	865.474	29.3628	4.38828	0.625611	0.0934979
155	461.216	415.301	-9.09102	-61.3044	-0.193696	-1.30617
156	498.617	1283.2	51.5707	26.5236	1.09878	0.565119
157	500.438	1553.28	34.5322	-29.1816	0.735753	-0.62175
160	506.961	780.61	14.4342	24.1145	0.30754	0.513789
161	520.551	1354.86	4.14262	-42.0861	0.0882639	-0.896698
162	498.152	118.407	43.8653	-25.5634	0.934607	-0.544661
163	495.951	505.537	6.87581	23.4485	0.146498	0.499599
164	516.919	692.468	113.323	97.5359	2.41449	2.07813
165	501.3	1199.3	45.8734	39.4607	0.977391	0.84076
166	525.547	253.905	54.3991	-11.469	1.15904	-0.244361
167	525.056	401.413	-16.3317	121.451	-0.347968	2.58767
168	513.527	1110.25	34.5799	-4.08082	0.736768	-0.086947
169	534.404	929.749	-31.8368	6.88336	-0.678323	0.146659
170	538.853	834.712	-64.7939	47.5496	-1.38052	1.0131
171	507.398	184.876	45.1857	21.1914	0.962739	0.451509
173	537.085	538.811	41.261	-84.293	0.879119	-1.79597
174	565.803	1421.15	37.3676	4.96633	0.796164	0.105814
175	547.123	1006.52	-24.2988	51.8059	-0.517717	1.10379
177	569.918	604.249	114.115	-76.7791	2.43137	-1.63588
178	568.183	1079.8	-15.9646	-24.326	-0.340147	-0.518296
179	574.452	120.157	-41.1885	7.86331	-0.877573	0.167538
180	570.792	1182.28	21.7749	0.738108	0.463943	0.0157263
181	593.528	424.003	82.38	33.9121	1.75521	0.72254
182	588.893	706.862	102.659	35.4736	2.18728	0.75581
183	585.555	245.993	65.9648	-35.3529	1.40546	-0.753239
184	585.059	1260.75	14.7221	-35.3673	0.313674	-0.753545
186	604.645	1500.63	-8.96412	-8.89945	-0.190992	-0.189614
187	610.418	773.539	75.9394	110.869	1.61799	2.36221
189	607.663	1579.87	52.0862	23.9264	1.10976	0.509783
190	597.339	872.699	-10.3718	11.3518	-0.220985	0.241864
191	618.278	326.53	25.7142	76.5051	0.547874	1.63004
192	617.528	522.614	39.33	81.5928	0.837975	1.73844
193	615.771	1315.56	-43.5534	-22.2531	-0.927961	-0.47413
194	621.183	999.313	2.48533	-27.3885	0.052953	-0.583547
195	631.624	1124.78	7.63471	-32.5587	0.162667	-0.693705
196	612.909	1063.44	-2.4675	42.7925	-0.0525733	0.911749
197	659.417	598.084	58.8638	175.197	1.25417	3.73279
198	624.741	129.204	-2.3587	-9.01514	-0.050255	-0.192079
199	637.433	210.373	36.7172	-13.4565	0.782306	-0.286708
201	663.747	1216.05	16.0101	0.245255	0.341116	0.00522547
202	647.001	883.86	-123.96	31.3204	-2.64114	0.667322
203	652.396	1427.69	67.9456	-21.1384	1.44767	-0.450381
205	650.323	1634.44	57.1737	-50.1728	1.21816	-1.069
206	660.97	426.784	39.8263	8.84455	0.84855	0.188444
207	691.897	793.994	23.5224	21.7548	0.501174	0.463514
208	672.688	706.359	12.1214	45.2445	0.258262	0.963991
209	678.96	138.625	-4.39661	-56.2988	-0.0936755	-1.19952
210	679.978	1324.81	96.0188	-8.18081	2.0458	-0.174303
211	689.25	1545.29	68.6358	28.8821	1.46237	0.615369
212	689.133	971.088	51.8774	74.1155	1.10531	1.57913
213	696.331	1058.02	111.886	40.8567	2.38387	0.870504
214	683.711	300.844	40.6975	-81.5525	0.867113	-1.73758
215	689.02	227.807	-17.418	-14.6364	-0.371112	-0.311848
218	710.778	1472.99	62.5139	9.07932	1.33194	0.193446
219	728.89	1139.17	34.2978	77.5498	0.730758	1.6523
220	709.981	1609.73	170.325	-76.2639	3.629	-1.6249
221	715.796	610.129	124.765	-67.4227	2.65827	-1.43653
222	720.548	873.604	20.6114	49.249	0.439152	1.04931
224	711.495	405.324	6.2464	-16.2603	0.133087	-0.346446
225	732.308	462.981	9.62432	-39.4961	0.205058	-0.841515
226	727.141	1403.76	67.6896	20.3044	1.44221	0.432611
227	752.934	1332.43	39.4291	47.441	0.840088	1.01079
228	747.72	305.442	33.8081	81.4837	0.720325	1.73612
229	808.231	301.461	-72.5389	-62.0994	-1.54553	-1.32311
230	744.416	1234.75	-8.28023	-27.7544	-0.176421	-0.591342
231	752.493	686.321	-49.1898	-9.70033	-1.04805	-0.206678
232	755.457	127.574	31.8281	3.58059	0.678139	0.0762889
233	755.903	215.396	-43.2254	5.71882	-0.920973	0.121847
235	768.376	952.98	0.136268	132.614	0.00290337	2.82551
236	774.01	550.795	13.6496	134.116	0.290822	2.85751
237	774.862	1453.52	4.74131	9.42544	0.10102	0.200821
238	776.35	1050.49	67.3969	33.547	1.43598	0.714762
239	786.41	1602.58	163.369	-32.4338	3.48079	-0.691043
240	763.426	886.013	-134.473	67.633	-2.86511	1.44101
241	782.842	1535.49	-9.84283	-28.8745	-0.209714	-0.615207
242	780.663	761.222	1.28362	6.30749	0.0273493	0.134389
244	810.416	399.437	9.86385	71.0468	0.210162	1.51374
245	818.563	807.705	-6.15233	90.1315	-0.131083	1.92037
246	826.65	1351.51	-39.1268	8.57627	-0.833646	0.182728
249	808.636	1253.23	11.5954	-17.7533	0.247054	-0.378257
250	808.944	1133.95	31.5719	-55.6288	0.672679	-1.18524
251	826.692	627.098	-32.1192	68.6116	-0.684341	1.46186
252	838.05	469.752	147.394	112.04	3.14042	2.38716
253	834.551	973.093	106.395	-44.9495	2.26689	-0.957707
254	822.598	117.136	40.5733	30.9184	0.864466	0.658757
255	829.466	190.575	63.7292	28.0103	1.35783	0.596795
257	828.051	1426.4	36.716	-49.5948	0.782281	-1.05668
258	860.519	1501.92	48.0607	6.7502	1.02399	0.143822
259	870.241	835.179	-7.97391	32.5077	-0.169894	0.692617
260	854.599	1042.95	-23.5186	5.16672	-0.501094	0.110084
261	904.062	901.184	-69.8916	111.287	-1.48913	2.37112
262	872.188	1265.86	77.8844	90.7743	1.65943	1.93406
264	877.342	688.698	62.613	12.0083	1.33405	0.255853
265	864.991	1120.73	53.7053	-52.5017	1.14426	-1.11862
266	880.343	1401.28	15.803	10.2057	0.336703	0.217446
267	876.307	289.458	-82.6541	36.4238	-1.76105	0.776055
268	886.19	1584.86	93.9624	13.6336	2.00199	0.290481
270	891.903	1178.95	1.78435	-17.1933	0.0380179	-0.366325
271	904.869	334.1	30.759	45.7911	0.655361	0.975637
272	908.584	451.626	37.7769	-45.2722	0.804886	-0.964581
273	902.239	568.22	-53.8407	37.1866	-1.14715	0.792308
274	907.477	117.334	74.0111	-8.71876	1.5769	-0.185764
276	919.46	228.115	114.038	84.541	2.42973	1.80125
277	917.795	1002.59	5.67735	7.72626	0.120963	0.164618
278	922.431	747.095	59.8914	-59.303	1.27606	-1.26353
279	921.478	1353.34	59.8088	-4.04888	1.2743	-0.0862666
280	934.781	1619.79	20.9643	-3.09243	0.446671	-0.0658881
281	960.593	623.539	89.344	36.6085	1.90359	0.779991
282	957.876	1090.1	34.3792	-20.9321	0.732493	-0.445985
283	958.094	1478.13	49.9973	-8.91401	1.06526	-0.189924
284	948.5	1273.97	168.18	135.283	3.58328	2.88237
285	966.09	1192.62	44.5959	-105.371	0.950173	-2.24505
286	944.031	1402.62	21.3287	5.57781	0.454436	0.118842
289	981.557	723.602	15.0966	34.0827	0.321651	0.726176
290	981.269	356.027	-42.3223	-8.1886	-0.90173	-0.174469
291	984.399	1006.13	49.1238	10.3612	1.04665	0.22076
292	981.172	493.277	17.4279	14.4674	0.371324	0.308247
293	989.135	810.901	-33.1592	11.3011	-0.706499	0.240784
294	987.976	124.224	60.9884	19.2483	1.29944	0.41011
295	987.55	900.066	76.2535	-26.7613	1.62468	-0.570184
296	995.265	1306.58	19.0716	102.586	0.406345	2.18572
297	974.944	205.549	-63.4164	28.8869	-1.35117	0.615472
298	1000.72	1574.01	-20.1926	-81.9219	-0.430229	-1.74545
299	1028.25	1629.77	28.5736	24.689	0.608797	0.52603
300	1005.61	253.215	-0.910878	28.2071	-0.0194074	0.600989
302	1027.06	1120.75	-30.551	-43.2986	-0.650929	-0.922531
304	1039.82	1354.93	-19.7672	-7.4027	-0.421165	-0.157724
305	1049.33	954.67	49.976	-52.9248	1.0648	-1.12763
307	1041.59	506.626	-57.0602	-2.62347	-1.21574	-0.0558964
308	1032.36	1474.77	-65.4717	26.4248	-1.39496	0.563014
309	1036.31	597.964	51.8814	-63.885	1.1054	-1.36115
310	1040.83	653.12	21.4586	79.7626	0.457202	1.69944
311	1054.21	210.249	-5.793	118.904	-0.123427	2.53341
312	1062.85	1245.7	-59.004	25.0308	-1.25716	0.533314
313	1068.14	313.361	-18.9871	11.4927	-0.404544	0.244867
314	1046.82	849.992	2.35152	-9.51668	0.0501022	-0.202765
315	1057.47	722.843	-79.838	29.2423	-1.70105	0.623045
316	1078.58	128.649	23.0316	-49.6067	0.490719	-1.05693
317	1090.78	411.516	36.1462	18.2009	0.770141	0.387793
318	1075.98	1154.15	-22.5854	-8.41648	-0.481211	-0.179324
319	1074.45	1044.24	34.9672	-35.4912	0.74502	-0.756184
320	1096.53	1520.02	58.7446	4.77014	1.25163	0.101634
321	1085.86	1407.17	78.8795	93.4357	1.68063	1.99077
322	1094.89	792.226	33.0633	11.7087	0.704456	0.249468
323	1136.93	637.877	0.909123	-99.248	0.01937	-2.11461
324	1108.71	562.01	83.9665	-55.4507	1.78901	-1.18145
325	1116.45	1192.3	28.2606	-21.5081	0.602127	-0.458257
326	1125.22	875.529	-48.7431	-28.2923	-1.03853	-0.602803
327	1138.72	261.005	44.2152	6.20251	0.942062	0.132152
328	1123.66	1345.84	-38.1372	77.0069	-0.812562	1.64073
329	1141.71	717.845	36.356	32.9982	0.774611	0.70307
330	1157.23	1267.08	15.3677	7.31818	0.327428	0.155923
331	1165.4	147.358	-9.24322	21.5597	-0.196939	0.459358
332	1123.86	950.067	-5.18556	79.8657	-0.110485	1.70164
333	1137.82	1041.13	32.0132	11.4142	0.682082	0.243195
335	1154.51	461.603	95.7119	-24.5654	2.03926	-0.523397
336	1153.88	65.1385	23.213	-7.08413	0.494582	-0.150937
337	1157.49	1403.91	16.1305	-36.9218	0.343681	-0.786667
338	1161.45	1624.37	1.60595	16.1318	0.0342168	0.343709
339	1144.41	794.722	83.7173	-9.55054	1.7837	-0.203486
340	1175.5	1514.59	-29.9346	6.96139	-0.637796	0.148321
341	1180.65	1166.01	-71.9621	2.40527	-1.53324	0.0512474
343	1216.86	322.554	34.1314	-10.9435	0.727213	-0.233165
344	1191.23	1107.72	-30.6996	-95.5781	-0.654094	-2.03641
345	1174.74	912.937	90.068	-8.77332	1.91901	-0.186927
346	1187.01	540.476	-60.5286	-57.8843	-1.28964	-1.2333
347	1205.46	797.122	-36.6961	33.7536	-0.781858	0.719164
348	1226.55	596.454	42.4977	-20.2666	0.905467	-0.431807
349	1206.89	1014.48	-87.1113	-63.3904	-1.85602	-1.35061
350	1221.58	76.1591	40.1949	17.8902	0.856403	0.381173
351	1232.22	1369.23	80.7577	19.6197	1.72065	0.418023
352	1202.11	244.995	-35.1436	3.11021	-0.74878	0.0662671
354	1219.84	689.825	42.0096	-74.7256	0.895068	-1.59212
355	1235.81	185.971	-13.3506	-15.8765	-0.284452	-0.338269
356	1230.94	1522.45	-2.53775	-40.9035	-0.0540701	-0.871502
357	1239.13	466.872	33.344	75.3743	0.710437	1.60595
358	1254.36	919.021	33.539	-62.0949	0.71459	-1.32301
359	1212.39	1283.58	27.2766	8.99207	0.581162	0.191588
360	1272.65	386.648	-22.8378	75.4933	-0.486588	1.60848
361	1236.58	1591.63	-10.3969	53.8699	-0.221518	1.14777
363	1259.57	1229.74	-73.9625	-1.95401	-1.57587	-0.0416326
364	1267.22	1118.96	-29.4201	-41.4737	-0.626832	-0.88365
366	1281.23	823.623	-33.2642	-80.246	-0.708737	-1.70974
367	1271.54	1005	5.87	69.7407	0.125068	1.48591
368	1290.79	1449.62	5.87835	-12.2933	0.125246	-0.261925
369	1278.94	147.838	62.2999	41.3979	1.32738	0.882034
370	1268.2	702.655	7.74667	20.2751	0.165053	0.431987
371	1290.75	531.536	33.3484	-8.19749	0.710529	-0.174658
372	1314.72	737.89	19.5829	-58.9634	0.417239	-1.25629
373	1299.23	1369.29	32.5363	3.82478	0.693228	0.0814919
374	1307.26	74.0086	18.2506	53.6374	0.388852	1.14281
375	1301.08	613.912	34.5264	-32.349	0.735628	-0.689237
377	1340.73	1499.09	8.31115	-3.41717	0.17708	-0.0728072
378	1328.9	238.149	4.1277	53.4813	0.087946	1.13949
379	1348.47	162.638	11.3653	3.6206	0.242152	0.0771415
380	1334.36	300.413	113.758	-13.5483	2.42375	-0.288664
381	1333.23	887.382	-24.8824	-37.7163	-0.53015	-0.803594
382	1330.14	353.154	53.1249	36.897	1.13189	0.786137
383	1325.23	1032.4	-5.30988	-13.3735	-0.113134	-0.284939
384	1353.69	431.373	27.4957	69.922	0.58583	1.48978
386	1349.17	1294.85	10.0149	27.2459	0.213381	0.580509
387	1352.58	1215.52	-51.1192	-10.5763	-1.08916	-0.225341
388	1351.97	1579.06	36.8351	-77.1183	0.78482	-1.6431
389	1365.36	605.368	18.5221	10.0184	0.394637	0.213454
390	1362.92	1109.96	-12.5569	-42.0301	-0.267542	-0.895505
391	1390.36	494.195	11.2453	59.7766	0.239595	1.27362
393	1387.97	693.582	-52.2397	-68.9875	-1.11303	-1.46987
394	1385.4	1371.56	32.9204	60.1133	0.70141	1.28079
395	1387.52	830.528	-40.1542	18.4337	-0.855536	0.392754
396	1385	1153.48	6.13619	-25.9973	0.130739	-0.553906
397	1385.49	60.4157	-22.7665	-21.0782	-0.48507	-0.449098
399	1382.55	1002.19	-69.3696	-5.42915	-1.47801	-0.115675
400	1416.6	328.863	73.9867	67.8051	1.57638	1.44467
401	1417.22	148.521	25.2267	6.12143	0.537486	0.130425
402	1404.32	238.816	87.3789	-71.8949	1.86172	-1.53181
403	1437.27	1513.46	14.2662	13.1749	0.30396	0.280709
404	1444.73	549.434	20.6356	9.29709	0.439668	0.198086
405	1432.9	1443.19	41.161	36.5353	0.876988	0.778431
406	1483.17	240.648	8.40032	9.8963	0.178979	0.210853
407	1449.55	1239.22	-29.1125	-19.5173	-0.620279	-0.415842
408	1452.8	738.641	-6.2663	-16.9115	-0.133511	-0.360322
409	1420.52	1215.06	-16.8819	-17.7294	-0.35969	-0.377747
410	1450.17	1111.57	-0.664749	-14.6028	-0.0141633	-0.311132
411	1451.9	974.337	75.28	24.1853	1.60394	0.515298
412	1457.38	192.419	18.5832	-34.0422	0.395938	-0.725311
413	1457.07	850.499	-19.0251	25.4621	-0.405354	0.542502
415	1458.99	1360.34	-8.90883	-15.802	-0.189814	-0.336682
416	1471.78	404.157	41.9694	92.7714	0.894211	1.97661
418	1461.97	1615.52	18.4502	-3.64417	0.393105	-0.0776438
419	1474.61	652.598	25.944	46.9403	0.55277	1.00012
420	1482.11	1039.76	-26.9561	-37.271	-0.574335	-0.794106
421	1495.95	1270.01	11.7772	-45.8694	0.250928	-0.977305
422	1508.21	1421.13	12.224	-5.34242	0.260448	-0.113827
423	1504.17	126.749	2.46442	-8.84661	0.0525077	-0.188488
425	1503.43	550.473	28.0709	16.3783	0.598087	0.348961
426	1491.53	1149.43	116.668	24.996	2.48575	0.532572
427	1527.76	304.489	36.6235	-26.8618	0.780309	-0.572325
428	1498.39	757.685	-18.7448	-9.7077	-0.399383	-0.206835
429	1520.44	847.361	-11.6403	-86.2436	-0.248012	-1.83753
430	1520.56	622.588	30.9263	18.933	0.658924	0.403392
431	1512.25	1521.83	-1.73949	-18.3824	-0.037062	-0.391661
432	1505.77	944.662	-24.1471	45.318	-0.514486	0.965558
433	1520.16	1612.63	9.0736	29.8705	0.193325	0.636428
434	1541.71	454.584	8.2028	70.9386	0.174771	1.51144
435	1533.35	1176.62	-34.46	4.3125	-0.734215	0.0918833
436	1537.4	1086.99	33.3513	12.3949	0.710591	0.264088
438	1541.34	1282.64	45.1709	-2.17368	0.962424	-0.0463129
439	1555.66	711.815	-68.1454	45.5271	-1.45193	0.970014
440	1553.5	923.758	8.75242	-6.19729	0.186481	-0.132041
441	1557.29	1007.3	49.6146	21.9032	1.0571	0.466676
442	1557.91	1346.56	6.54185	-8.64644	0.139382	-0.184224
443	1565.87	353.806	50.4245	-22.1156	1.07436	-0.471201
444	1563.78	202.812	11.7136	-29.4846	0.249574	-0.628208
445	1556.73	533.107	-11.8416	-23.4487	-0.2523	-0.499605
446	1576.6	1480.2	10.6141	-38.583	0.226147	-0.82206
448	1592.64	574.737	7.02222	38.5877	0.149617	0.822161
449	1595.26	97.1935	-30.9557	20.4333	-0.65955	0.435358
450	1596.11	1585.76	1.86456	-21.4778	0.0397268	-0.457613
451	1574.59	805.044	35.8794	12.9615	0.764456	0.276161
452	1600.13	1129.5	-43.6534	36.2552	-0.930091	0.772464
453	1606.5	236.846	-25.2486	32.7141	-0.537954	0.697015
454	1602.2	398.863	-8.9327	-1.46585	-0.190323	-0.0312319
455	1595.1	1254.18	-4.50678	-31.2057	-0.0960228	-0.664877
462	1639.34	678.805	-53.9378	5.30872	-1.14921	0.113109
463	1629.47	1019	-0.483536	-24.5822	-0.0103023	-0.523755
464	1643.4	138.484	-12.1672	-20.8768	-0.259237	-0.444807
465	1636.41	946.601	65.8392	-57.749	1.40279	-1.23042
466	1636.35	495.427	38.9648	28.1192	0.830196	0.599116
471	1651.46	1306.69	25.0382	-7.58539	0.533472	-0.161616
473	1654.81	423.429	-6.71783	0.302128	-0.143132	0.00643722
22	41.5464	411.284	76.6915	27.6612	1.35953	0.490356		0.278114	158.466
23	53.7466	800.127	-44.744	-4.96671	-0.793187	-0.0880462
24	52.1334	895.484	16.5864	-9.826	0.294032	-0.174188
25	48.7069	568.949	74.7486	-7.64933	1.32509	-0.135602
26	55.7461	667.301	1.76597	-24.2539	0.0313057	-0.429956
28	41.5237	1289.63	-22.6635	1.27806	-0.401761	0.0226565
30	94.8901	1018.64	15.2137	-2.42341	0.269696	-0.0429604
31	97.6117	426.95	3.40234	-7.28047	0.0603141	-0.129063
32	97.4531	1174.06	-17.2441	87.9039	-0.305691	1.55829
33	99.7455	1358.17	5.09713	13.1991	0.090358	0.233984
34	99.1116	288.647	47.7737	54.5125	0.846896	0.966357
35	107.529	929.336	-66.677	-54.744	-1.182	-0.970461
36	92.6808	1273.52	12.7629	60.4097	0.226251	1.0709
37	121.199	683.406	-7.13192	-54.5988	-0.126429	-0.967886
39	119.007	523.085	-71.0537	36.9325	-1.25959	0.654712
40	119.486	773.699	-5.15393	56.8154	-0.0913651	1.00718
41	123.558	158.039	-99.1844	-125.939	-1.75827	-2.23256
42	135.432	1111.66	51.992	-30.2593	0.921676	-0.536414
43	126.184	611.185	-39.7427	43.732	-0.704529	0.775248
44	132.502	1242.4	16.1269	101.209	0.285885	1.79416
45	151.318	862.455	-12.9232	-51.2882	-0.229094	-0.909199
46	141.857	1425.3	48.5387	41.1016	0.860457	0.728618
47	168.386	92.0365	72.7863	-113.354	1.2903	-2.00945
48	146.899	1328.48	-26.8972	39.6224	-0.476813	0.702396
50	168.36	331.088	9.60226	29.7374	0.170222	0.527162
51	175.185	966.33	-2.94085	25.144	-0.0521332	0.445734
52	192.252	554.993	28.5691	-29.1952	0.506452	-0.51755
53	176.255	240.839	-11.8659	-136.05	-0.210351	-2.41178
54	192.119	1210.75	-3.3721	-6.70355	-0.059778	-0.118836
55	198.481	1316.11	-46.5813	70.4817	-0.825758	1.24945
56	180.627	713.341	-60.0406	20.9298	-1.06436	0.371027
57	192.34	427.409	42.9458	20.4601	0.761311	0.362701
58	201.217	1021.82	-35.7184	-36.373	-0.633188	-0.644794
59	213.279	810.195	-10.4749	35.8826	-0.185691	0.6361
60	188.875	1114.16	42.3782	11.01	0.751249	0.195177
62	240.886	635.398	36.597	67.3814	0.648763	1.19449
64	232.836	162.631	44.9341	-95.5502	0.796558	-1.69384
65	233.559	1154.87	1.2435	-24.9252	0.0220439	-0.441855
66	243.342	1060.32	42.6001	35.8763	0.755183	0.635989
67	248.064	1392.84	146.323	54.0505	2.5939	0.958166
68	243.26	261.326	13.8285	-53.6017	0.245141	-0.950211
69	245.669	708.191	-68.0214	-4.78557	-1.20583	-0.0848351
70	255.3	352.14	27.2361	40.159	0.482821	0.711908
71	259.868	913.549	31.552	-32.4613	0.55933	-0.575449
73	280.255	836.497	-28.1244	20.6755	-0.498569	0.36652
74	279.792	549.545	56.5336	49.5576	1.00218	0.87852
75	273.592	441.742	-58.2995	-15.7698	-1.03349	-0.279555
76	261.012	1300.01	-25.9529	-16.5711	-0.460074	-0.293761
78	285.626	1251.13	11.1978	74.4206	0.198507	1.31927
79	304.557	958.903	22.5175	-49.7031	0.399174	-0.8811
80	291.202	1134.74	40.3989	-26.0548	0.716162	-0.46188
81	298.693	1044.28	64.9859	-56.6557	1.15202	-1.00435
82	309.432	185.679	2.68105	12.9999	0.0475277	0.230452
83	320.975	1424.16	15.2047	139.412	0.269537	2.47139
84	312.799	267.706	113.192	82.8726	2.00658	1.4691
85	315.157	726.36	9.39845	-62.7594	0.166609	-1.11255
86	319.812	1218.63	11.5076	51.3236	0.203998	0.909826
87	321.106	477.424	53.9429	-41.2588	0.95626	-0.731406
88	336.151	1342.49	39.9494	13.2135	0.708194	0.234238
89	308.422	107.103	-59.7185	13.8856	-1.05864	0.246153
92	333.028	601.574	-39.0607	38.0311	-0.692439	0.674186
93	339.088	363.764	95.5024	-49.7116	1.693	-0.88125
94	344.39	826.41	-53.6662	-46.0034	-0.951354	-0.815513
96	375.822	142.745	39.4765	21.0055	0.699811	0.37237
97	350.741	1156.99	30.793	1.29119	0.545875	0.0228892
98	353.341	1074.34	17.1154	50.275	0.303409	0.891238
99	394.201	1004.14	95.9729	-2.11339	1.70134	-0.0374645
101	393.816	470.189	14.1311	-34.2413	0.250506	-0.607005
103	382.574	885.434	-25.4961	5.76081	-0.451976	0.102123
104	396.501	954.626	37.5743	33.0521	0.666089	0.585922
105	386.946	254.776	45.4829	-20.1261	0.806287	-0.35678
106	396.259	630.405	21.8126	-34.6949	0.386677	-0.615046
107	385.301	1214.45	12.3904	78.9782	0.219648	1.40007
108	381.899	1405.44	-24.2643	8.97368	-0.430138	0.159079
109	405.208	1267.9	-11.389	68.807	-0.201896	1.21976
110	411.961	761.514	123.956	31.5623	2.19741	0.559514
111	402.88	552.06	53.4827	89.8162	0.9481	1.59219
112	436.759	671.592	103.177	38.2685	1.82905	0.678395
113	392.195	358.401	88.111	28.311	1.56197	0.501876
114	418.971	1339.08	-21.8853	18.5621	-0.387966	0.329054
115	423.889	1134.68	189.94	-8.33927	3.36711	-0.147832
116	429.639	898.91	46.7795	22.2972	0.829272	0.395268
117	416.996	1064.13	32.0276	-36.2117	0.567761	-0.641933
119	426.847	424.575	-67.7922	-35.4155	-1.20177	-0.62782
120	439.883	1425.76	-15.065	-11.0352	-0.267061	-0.195624
121	453.629	187.001	71.7583	9.9659	1.27208	0.176668
122	448.649	349.228	26.6522	9.83556	0.472469	0.174357
124	455.804	805.047	6.13378	56.7388	0.108735	1.00582
125	462.235	1208.33	115.228	38.0388	2.04268	0.674324
127	478.162	93.9556	56.8432	9.19675	1.00767	0.163033
128	489.461	427.48	60.9292	-38.0571	1.08011	-0.674648
129	471.047	1061.21	-43.312	-56.8938	-0.767803	-1.00857
130	488.769	1156.75	84.2012	61.8156	1.49266	1.09582
131	495.328	975.542	19.307	-40.7598	0.342261	-0.722559
132	490.33	1106.68	160.371	28.1774	2.84294	0.499508
133	477.617	1324.57	7.07247	-7.26899	0.125375	-0.128859
134	501.544	886.374	10.6577	-36.2246	0.188932	-0.642163
135	511.402	223.068	26.7873	133.522	0.474865	2.36698
136	500.075	550.569	56.4476	-83.5283	1.00066	-1.48073
137	506.415	1259.86	6.58535	15.2224	0.11674	0.269851
138	518.514	1364.1	3.27766	-38.1722	0.0581039	-0.676688
140	500.959	813.251	-7.52099	15.8901	-0.133327	0.281687
141	525.172	1052.98	37.043	-44.2847	0.65667	-0.785046
142	516.244	703.539	56.3751	50.0027	0.999376	0.88641
143	558.67	613.19	11.4401	53.2938	0.202801	0.944753
145	543.079	371.55	-55.498	40.7824	-0.983828	0.72296
146	552.575	1181.67	70.2238	16.6001	1.24488	0.294274
148	554.983	96.5358	6.91819	54.5699	0.122641	0.967374
149	570.101	1112.66	102.185	-71.0752	1.81147	-1.25997
150	560.873	787.438	-35.8936	62.7971	-0.636294	1.11322
151	562.775	914.369	-43.729	-35.1591	-0.775195	-0.623274
153	565.011	536.705	85.688	65.6234	1.51901	1.16332
154	563.699	1394.33	-49.3741	9.45805	-0.875268	0.167665
155	576.104	478.808	35.2309	54.1917	0.624548	0.96067
156	601.224	268.658	106.372	19.7093	1.88569	0.349392
157	588.519	1296.78	2.53843	36.1309	0.0449994	0.640501
158	584.776	1227.99	18.1068	-32.8222	0.320984	-0.581848
159	604.469	1022.13	57.2291	4.66377	1.01452	0.0826758
160	588.773	693.302	-79.7244	124.16	-1.4133	2.20101
161	604.877	170.253	24.7238	86.0038	0.438286	1.52461
163	605.369	438.25	-5.68999	72.3898	-0.100868	1.28327
164	609.935	828.012	-82.4211	-170.557	-1.4611	-3.02351
166	600.223	351.75	-79.2825	-9.55799	-1.40546	-0.169437
167	615.078	1395.55	11.7111	32.1731	0.207605	0.57034
168	637.69	1148.35	-8.0668	47.9377	-0.143002	0.849804
169	623.615	920.051	19.3431	89.513	0.3429	1.58682
170	639.062	1348.43	42.0843	30.2479	0.746039	0.536212
171	648.376	520.248	-57.5733	62.3967	-1.02062	1.10612
172	629.948	693.151	-191.748	21.537	-3.39916	0.381793
174	640.983	635.666	0.0912397	-41.3949	0.00161743	-0.733818
175	659.811	768.009	2.42432	102.61	0.0429765	1.81899
176	665.01	395.076	-65.778	5.641	-1.16606	0.0999993
177	684.281	623.713	-32.2263	55.1258	-0.571284	0.977228
178	659.961	131.54	-27.706	-34.8429	-0.491151	-0.617669
179	649.802	1267.84	-13.1563	23.2854	-0.233226	0.412786
180	676.513	1079.51	-62.7879	34.1328	-1.11306	0.60508
181	682.197	318.698	-27.758	60.1761	-0.492074	1.06676
182	677.045	1219.5	18.7274	7.12841	0.331985	0.126367
184	684.729	854.36	-44.5628	-37.2561	-0.789976	-0.660448
185	689.867	971.861	107.684	-61.3266	1.90895	-1.08715
186	672.044	903.097	-55.9353	63.3797	-0.991579	1.12355
187	683.211	1396.94	59.2493	-17.2381	1.05033	-0.305584
188	694.504	1298.93	-22.8517	-34.1557	-0.405098	-0.605488
189	705.003	462.43	50.5063	67.7697	0.895338	1.20137
191	705.592	209.626	-20.1309	-36.4331	-0.356866	-0.645859
192	738.645	686.939	-15.1237	18.3038	-0.268102	0.324477
194	717.649	791.597	-3.59189	10.8367	-0.0636744	0.192105
195	725.445	1035.27	75.0552	-28.4121	1.33052	-0.503668
196	736.613	1113.81	61.3482	-30.5992	1.08753	-0.54244
197	728.99	1198.89	-5.74887	-9.66568	-0.101912	-0.171346
199	739.638	559.691	-91.4885	-24.0363	-1.62184	-0.426098
200	735.64	896.185	2.94935	-18.1624	0.0522839	-0.32197
201	733.357	1324.95	-11.4674	-46.6382	-0.203285	-0.826767
202	733.336	1386.4	42.9513	29.8795	0.761408	0.529681
204	760.214	359.92	79.8799	84.3483	1.41605	1.49526
205	759.45	141.042	14.5555	-40.3573	0.25803	-0.715423
206	757.661	263.104	-59.4296	-83.0033	-1.05352	-1.47142
207	782.478	962.106	-10.9878	-40.0101	-0.194784	-0.70927
208	759.91	455.334	23.8191	-19.7054	0.422247	-0.349323
209	793.73	850.902	5.56664	19.918	0.0986813	0.353091
210	772.848	755.27	-66.6263	75.3822	-1.1811	1.33632
211	785.016	1314.36	24.3779	25.5095	0.432152	0.452214
214	780.83	1035.79	138.25	86.091	2.4508	1.52616
215	811.615	1236.72	-73.3905	200.28	-1.30101	3.55041
216	772.48	1188.45	29.3735	131.705	0.520712	2.33476
217	785.766	598.344	-25.682	13.3702	-0.455271	0.237017
218	820.153	1144.08	22.3408	-4.32394	0.396041	-0.0766516
219	808.818	181.209	-51.9053	-34.5387	-0.920138	-0.612277
220	818.429	1415.03	63.3283	102.042	1.12264	1.80893
221	814.17	481.475	118.373	-6.06734	2.09842	-0.107557
222	838.459	1074.08	-25.5848	79.3057	-0.453548	1.40587
223	802.369	299.138	-59.4289	122.018	-1.05351	2.16305
224	829.251	364.041	-8.35824	43.0879	-0.148169	0.76383
225	822.128	721.931	1.72859	94.7319	0.0306432	1.67934
226	837.216	541.306	23.6111	-9.70893	0.418561	-0.172113
227	856.32	898.994	9.26289	-21.8538	0.164206	-0.387408
228	857.76	221.394	15.8481	39.5676	0.280943	0.701426
229	847.363	1354.47	42.8379	-23.2518	0.759398	-0.412191
230	847.322	619.444	56.8751	70.8687	1.00824	1.25631
231	897.74	1286.96	18.915	42.4438	0.335311	0.752411
233	874.681	450.298	54.1343	-7.90313	0.959653	-0.140101
234	875.667	789.138	-140.396	-19.2951	-2.48883	-0.342049
236	883.859	1018.58	47.4946	-24.3124	0.841949	-0.430992
237	886.806	1203.67	11.8165	73.9152	0.209474	1.31031
238	893.256	95.0045	-14.0773	-60.6653	-0.249552	-1.07543
239	908.665	665.867	71.2643	52.3385	1.26332	0.927817
240	894.738	729.615	42.7098	-15.7613	0.757128	-0.279405
241	917.104	1133.6	27.3922	-18.8725	0.485588	-0.334558
242	900.214	367.825	45.627	24.2318	0.808842	0.429563
243	913.742	955.021	25.8247	19.9157	0.4578	0.35305
244	919.51	543.939	10.9811	28.5747	0.194665	0.50655
245	902.653	1371.52	-89.1782	4.30097	-1.58088	0.0762445
246	898.755	260.89	-77.7961	-48.4911	-1.37911	-0.859614
247	968.419	1043.99	37.9416	-2.13448	0.672601	-0.0378384
248	912.678	1438.98	-54.4564	-28.2505	-0.965362	-0.500804
250	940.07	877.808	4.76464	31.8962	0.084464	0.565431
251	940.799	266.422	3.37711	-0.109891	0.0598668	-0.00194806
252	937.664	804.045	-50.2333	17.38	-0.890499	0.3081
254	943.109	112.651	18.0077	-49.585	0.319227	-0.879005
255	958.936	1359.86	-3.63152	21.3743	-0.0643769	0.378907
256	965.553	1439.88	29.6404	4.81933	0.525442	0.0854335
257	956.189	409.928	32.4964	11.3156	0.576073	0.200595
258	957.174	1220.45	94.2781	62.0215	1.67129	1.09947
259	992.347	742.129	48.4801	67.3352	0.859419	1.19367
260	980.286	970.734	15.6193	25.7075	0.276887	0.455723
261	987.323	1096.18	8.04137	8.78049	0.142551	0.155654
262	977.728	639.538	18.5297	42.2982	0.328481	0.74983
263	991.131	211.885	-21.1411	13.5812	-0.374774	0.240758
265	1012.14	1153.18	74.0501	104.715	1.31271	1.85631
267	1004.46	542.714	7.80408	27.7509	0.138345	0.491947
268	1014	1256.31	-1.95117	3.38566	-0.0345889	0.0600185
269	1015.12	120.279	37.2879	-6.84511	0.661013	-0.121345
270	1021.13	831.45	31.9209	11.6179	0.565871	0.205954
271	1006.91	309.129	-50.78	-56.5022	-0.900189	-1.00163
272	1013.73	397.926	6.46725	-2.19607	0.114647	-0.0389303
273	1029.27	926.75	127.496	29.11	2.26015	0.51604
274	1029.03	1370.8	0.967229	-69.189	0.0171463	-1.22653
275	1061.86	235.153	-19.3426	37.5778	-0.342892	0.666152
276	1049.73	686.956	-1.19932	106.327	-0.0212606	1.88488
277	1069.34	1267.58	46.8399	-31.9157	0.830343	-0.565777
279	1058.02	544.345	-29.4941	0.554362	-0.522849	0.00982732
280	1056.92	1074.36	-77.0216	117.864	-1.36538	2.0894
282	1080.67	1171.92	67.3482	45.8261	1.1939	0.812371
283	1064.3	95.8268	107.877	40.8647	1.91237	0.724418
284	1080.87	803.137	-28.32	43.835	-0.502037	0.777074
285	1090.65	346.094	20.2627	-13.0841	0.359202	-0.231945
286	1099.07	1327.15	46.2981	-76.3982	0.820738	-1.35433
287	1103.83	1022.79	54.0517	48.811	0.958189	0.865285
288	1077.56	1394.51	-77.6792	-24.8858	-1.37704	-0.441157
289	1127.12	412.055	-38.1627	-1.73967	-0.676519	-0.0308396
290	1088.9	922.041	61.2587	-61.9465	1.08595	-1.09814
291	1105.25	695.073	3.68734	-21.5566	0.0653664	-0.38214
292	1129.22	1106.9	57.3772	-40.8723	1.01714	-0.724553
293	1110.27	130.395	-43.9755	-7.20903	-0.779566	-0.127796
294	1114.69	868.706	12.9976	19.7875	0.230411	0.350778
296	1114.24	532.372	10.562	20.0628	0.187235	0.355658
297	1140.4	778.267	1.05034	4.99895	0.0186197	0.0886177
298	1156.59	1182.85	50.7232	-24.0679	0.899183	-0.426657
299	1147.91	956.401	-24.6647	-51.9853	-0.437238	-0.921557
301	1143.2	1261.6	35.2456	-79.2113	0.624807	-1.4042
302	1159.22	207.395	-11.2872	60.4386	-0.200092	1.07141
303	1149.57	298.149	-95.442	1.0314	-1.69192	0.018284
304	1167.72	93.9442	33.8404	78.1528	0.599897	1.38543
305	1160.92	645.51	56.7936	69.1332	1.00679	1.22554
306	1174.47	842.935	34.4906	15.7051	0.611424	0.278408
307	1156.66	1346.64	7.11108	54.2725	0.12606	0.962102
309	1160.14	522.298	130.715	82.5625	2.31722	1.46361
310	1195.81	1009.19	75.0405	8.79112	1.33026	0.155842
311	1221.51	1407.57	107.627	7.6897	1.90794	0.136317
312	1212.14	1233.56	21.0245	-19.3607	0.372706	-0.343212
313	1209.07	433.626	14.8034	-5.09973	0.262424	-0.0904042
314	1206.29	1096.86	36.133	-33.3873	0.64054	-0.591865
315	1213.38	554.463	42.5985	62.6858	0.755154	1.11125
317	1234.99	935.609	82.2126	29.5237	1.4574	0.523375
318	1222.17	712.458	-50.3683	46.4661	-0.892891	0.823717
319	1218.6	1322.8	23.2078	109.693	0.41141	1.94455
320	1190.35	386.774	-44.6217	12.5878	-0.791021	0.223146
321	1214.83	305.272	-28.1361	-13.7786	-0.498776	-0.244256
322	1222.68	159.93	-20.2414	67.0674	-0.358825	1.18892
323	1236.12	859.263	54.7666	20.1086	0.97086	0.356471
324	1269.83	782.968	-29.1661	-16.1962	-0.517034	-0.287114
325	1232.84	1170.54	60.8181	162.202	1.07814	2.87539
327	1261.96	607.907	-0.344781	0.872201	-0.00611202	0.0154617
328	1256.34	1058.41	-26.7828	-20.2751	-0.474786	-0.359421
329	1261.17	255.124	-8.5128	-22.2725	-0.150909	-0.394829
330	1281.99	125.803	4.27933	37.0269	0.0758608	0.656386
331	1267.08	419.991	0.389922	12.1833	0.00691224	0.215977
332	1268.95	1280.47	13.6357	75.0614	0.241724	1.33063
334	1293.33	326.596	46.4933	-42.795	0.824199	-0.758638
335	1299.42	1192.11	141.458	-55.2535	2.50767	-0.979493
336	1286.71	493.814	-6.88226	-3.32677	-0.122004	-0.0589745
337	1298.15	1101.23	-14.0773	-29.5476	-0.249552	-0.523798
338	1287.02	718.02	-46.4243	18.1795	-0.822976	0.322273
339	1304.19	984.845	3.96153	17.6172	0.0702271	0.312305
340	1294.4	859.109	-49.906	-37.7782	-0.884697	-0.669704
341	1337.66	1406.51	56.118	28.735	0.994819	0.509393
342	1314.42	1332.17	50.4261	-64.7304	0.893916	-1.14749
344	1312.26	219.553	-17.7179	40.2232	-0.31409	0.713047
345	1310.96	641.892	-21.5204	21.2727	-0.381497	0.377107
346	1334.89	384.662	8.14873	-74.0029	0.144455	-1.31187
347	1358.05	1260.9	6.31058	26.1247	0.111869	0.46312
348	1366.06	552.158	-20.5221	2.90958	-0.3638	0.0515789
349	1334.75	484.457	-8.35391	-39.3592	-0.148092	-0.69773
350	1351.98	874.282	-31.8198	-17.0433	-0.564077	-0.302131
351	1367.44	672.071	6.99572	-72.7134	0.124015	-1.28901
352	1359.77	58.3303	29.1432	12.7359	0.516629	0.225772
353	1340.17	776.895	-29.7919	-71.6867	-0.528128	-1.27081
354	1368.61	1066.23	-40.1312	-27.6221	-0.711416	-0.489663
355	1377.79	961.441	-3.75789	45.3153	-0.066617	0.803315
356	1356.47	193.738	12.8113	21.047	0.22711	0.373105
357	1389.73	1169.98	-27.3945	27.5568	-0.485629	0.488505
358	1373.68	304.23	24.726	-13.0214	0.438323	-0.230833
360	1380.82	121.877	-24.9065	-13.3215	-0.441524	-0.236154
361	1394.32	787.195	11.1403	27.0138	0.197487	0.478881
362	1407.05	380.793	2.04851	36.5667	0.0363144	0.648227
363	1425.54	1288.93	50.7454	50.0043	0.899577	0.886438
364	1419.26	474.076	6.90729	-8.10046	0.122447	-0.143599
365	1422.77	245.381	-32.8853	-49.4876	-0.582965	-0.877278
367	1430.23	159.285	4.88516	-22.1629	0.0866005	-0.392887
368	1423.04	890.083	-14.1463	1.76122	-0.250775	0.0312217
369	1441.48	731.72	1.86403	44.6775	0.0330441	0.792009
370	1437	1078.76	-3.60025	41.0511	-0.0638225	0.727724
382	1463.56	811.618	46.0109	-55.6073	0.815647	-0.985764
19	35.5864	548.121	-39.9588	11.0639	-0.695818	0.19266		0.525586	6.92742
20	9.23077	669.5	-42.5254	32.5274	-0.740512	0.566413
21	22.2121	701.291	-32.9871	13.8965	-0.574418	0.241986
22	45.3148	1373.84	46.7366	-6.50521	0.813844	-0.113278
23	54.519	1054.08	-29.8645	-21.9954	-0.520043	-0.383015
24	52.4662	418.666	41.5003	31.6113	0.722662	0.55046
25	42.8186	628.925	63.2625	-21.5382	1.10162	-0.375054
26	58.8257	794.021	-11.8876	-92.9549	-0.207003	-1.61866
27	63.7061	205.746	17.0264	-111.114	0.296488	-1.93487
28	69.3934	1290.61	-37.8406	45.0102	-0.658934	0.783781
29	62.6967	1465.15	17.6773	81.5378	0.307822	1.41985
31	81.3054	116.946	-6.34919	34.9305	-0.110561	0.608259
32	72.7252	710.609	-31.5393	12.1063	-0.549207	0.210811
34	94.2306	1217.44	21.5763	5.24503	0.375716	0.0913338
35	69.9347	349.121	47.5021	-111.889	0.827174	-1.94837
36	97.8768	268.451	77.1567	-23.0356	1.34356	-0.401128
37	78.9034	901.225	22.2346	-45.5446	0.387181	-0.793086
38	86.9991	1000.92	32.9375	9.84882	0.573555	0.171501
39	84.5703	525.198	70.9167	8.69878	1.2349	0.151475
40	97.9893	1422.07	17.9203	61.7748	0.312054	1.07571
42	96.2321	644.267	12.2379	2.0778	0.213104	0.0361816
43	109.539	333.282	112.24	26.6075	1.95449	0.463327
45	111.28	425.215	26.54	-16.7377	0.462152	-0.29146
46	143.627	1399.12	-57.2035	46.6756	-0.996108	0.812782
47	133.413	1169.2	62.3581	64.9001	1.08587	1.13013
48	121.213	767.169	56.9074	12.5787	0.990951	0.219037
49	135.482	1088.93	26.8501	5.63015	0.467552	0.0980402
50	140.752	597.263	105.4	-69.6981	1.83537	-1.21368
51	136.371	997.669	29.0941	-55.5463	0.506627	-0.96725
52	134.9	1299.12	8.30221	-12.6007	0.14457	-0.21942
53	152.488	893.033	29.0872	-19.6717	0.506507	-0.342552
55	160.358	236.897	45.0668	-91.0436	0.784767	-1.58538
56	150.646	1475.07	-31.4907	1.89461	-0.548361	0.0329917
57	151.033	170.038	-2.88616	-9.24503	-0.0502579	-0.160988
59	160.048	457.277	83.8491	15.4918	1.4601	0.269766
60	175.746	93.4864	-23.3268	-22.1906	-0.406198	-0.386415
61	179.662	316.058	47.4602	-109.274	0.826445	-1.90283
62	174.264	680.221	53.7175	-19.7213	0.935404	-0.343415
63	169.533	766.865	56.3035	67.5983	0.980436	1.17712
64	193.493	1342.75	120.811	-30.8027	2.10374	-0.536379
65	183.204	1260.63	-35.1706	-24.4173	-0.61244	-0.425189
66	201.857	1520.2	-23.1397	9.9614	-0.402941	0.173462
67	197.758	1030.11	-19.9655	-29.2088	-0.347668	-0.508624
69	203.627	584.33	60.1408	-23.0458	1.04726	-0.401306
70	200.98	958.082	-27.5236	-19.7388	-0.47928	-0.343719
71	199.023	1168.7	37.0425	-107.939	0.645036	-1.87958
73	209.556	1417.44	-20.0849	-59.5633	-0.349746	-1.0372
74	217.915	1092.04	40.3263	50.7156	0.702217	0.883132
75	207.094	415.236	-54.5337	26.0933	-0.949618	0.454373
76	214.048	171.403	-21.2793	-101.401	-0.370544	-1.76573
77	244.852	507.226	-11.8544	-38.2802	-0.206425	-0.666588
78	226.008	767.216	32.6584	-44.218	0.568694	-0.769985
79	243.348	1261.46	-24.134	-14.0464	-0.420255	-0.244595
81	250.921	352.235	12.4284	36.1217	0.21642	0.629001
82	247.921	864.14	115.783	7.08313	2.01618	0.123341
83	248.779	264.528	49.7045	-125.577	0.865525	-2.18673
84	240.267	667.313	51.7992	-39.1035	0.902	-0.680925
85	251.23	61.1362	52.024	-34.7059	0.905915	-0.604348
86	264.627	187.785	5.86258	-56.1999	0.102087	-0.978632
87	270.614	112.505	44.8968	-32.3727	0.781806	-0.563719
88	256.232	954.582	-19.1047	-13.9831	-0.332678	-0.243493
89	258.431	1415.75	-75.1475	35.661	-1.30857	0.62098
90	266.588	1038.18	-18.2451	-81.8945	-0.317709	-1.42606
91	267.879	1154.91	97.5396	15.0774	1.6985	0.262549
92	269.228	431.013	37.2493	-88.1555	0.648637	-1.53509
94	305.845	1344.31	116.439	14.5432	2.02761	0.253247
96	295.925	640.134	5.97458	-3.46511	0.104038	-0.0603393
97	276.762	1523.01	83.8772	39.1631	1.46059	0.681962
98	306.02	776.05	-41.2681	-22.079	-0.718618	-0.38447
99	288.473	561.883	38.0945	14.585	0.663355	0.253975
100	311.207	876.235	45.788	32.6615	0.797325	0.568748
101	304.908	245.561	-16.3597	-52.9109	-0.284878	-0.921358
102	305.733	983.34	-21.5159	-6.10679	-0.374666	-0.10634
103	345.509	1221.75	53.1762	-1.63826	0.925979	-0.0285277
104	330.234	409.071	43.2554	-49.9292	0.753223	-0.869437
105	317.364	1430.03	-18.8756	-20.8884	-0.328689	-0.363737
106	336.326	1285.69	49.7304	95.6172	0.865975	1.66502
107	320.579	530	-33.1217	-104.633	-0.576762	-1.82202
108	330.75	147.849	61.9858	-45.5277	1.07938	-0.792792
109	344.505	333.077	12.2955	39.869	0.214107	0.694255
110	339.353	1080.05	117.396	-41.3152	2.04427	-0.719439
111	348.853	1149.13	94.9247	4.21085	1.65296	0.0733253
112	333.248	1514.45	151.33	3.00093	2.63517	0.0522563
114	353.486	706.425	16.5096	12.9488	0.287489	0.225482
115	357.413	263.43	19.9373	-35.1116	0.347176	-0.611413
116	351.218	1008.15	26.0694	32.8806	0.453957	0.572564
117	358.425	901.568	37.5639	5.53513	0.654115	0.0963854
118	366.048	75.8988	20.3245	-59.5616	0.353918	-1.03717
119	385.822	185.705	49.8701	-15.0708	0.868409	-0.262433
121	375.319	473.007	-31.8351	-38.8716	-0.554357	-0.676887
122	386.659	615.826	15.1066	-58.026	0.263057	-1.01043
123	394.763	786.126	0.0850152	-90.3514	0.0014804	-1.57333
124	385.967	1376.91	81.856	-76.7652	1.42539	-1.33674
125	388.071	1500.54	108.735	-85.4467	1.89345	-1.48792
126	417.413	214.06	-0.959872	28.9253	-0.0167146	0.503688
127	408.332	982.209	-13.9642	4.13863	-0.243164	0.0720677
128	413.71	127.478	76.81	13.3548	1.33752	0.232552
129	414.139	311.799	-2.15986	-58.6247	-0.0376104	-1.02086
130	419.932	1275.23	48.187	24.0958	0.8391	0.41959
131	421.543	531.214	-0.787724	-46.9469	-0.013717	-0.817506
132	413.589	885.82	-10.5591	6.87374	-0.183869	0.119695
133	429.024	1064.46	97.1517	-33.1219	1.69174	-0.576765
134	416.323	1116.12	16.4054	-29.6883	0.285675	-0.516974
135	438.396	1420.58	-37.779	-75.5114	-0.657861	-1.31491
136	439.396	404.811	55.3746	-8.77339	0.96426	-0.152775
137	445.973	1169.94	26.7117	-39.3126	0.465142	-0.684567
138	437.183	691.148	-75.1354	-4.05012	-1.30836	-0.0705264
139	451.204	836.122	-58.77	4.51883	-1.02339	0.0786882
140	457.531	1340.31	46.014	-35.5617	0.801261	-0.619251
142	462.643	261.552	-5.66935	139.747	-0.0987227	2.43348
143	457.077	1484.55	52.9601	-58.3564	0.922216	-1.01618
144	467.259	110.649	-48.5014	-70.3999	-0.844574	-1.2259
146	486.313	596.48	127.369	-18.4032	2.21792	-0.320462
147	473.229	1238.61	-24.887	-2.75458	-0.433367	-0.0479666
148	474.021	503.653	68.8333	42.8593	1.19862	0.746327
149	480.367	1031.33	51.4863	50.52	0.896552	0.879725
150	489.131	935.279	19.6487	-75.3921	0.342151	-1.31283
151	492.89	1542.99	76.7193	-91.6159	1.33594	-1.59534
152	491.573	790.565	143.747	-2.11763	2.50312	-0.0368752
153	503.124	208.195	-36.6994	-26.3099	-0.639062	-0.458144
154	533.693	357.66	-29.259	103.683	-0.509499	1.80547
155	499.044	698.347	24.0589	-10.0172	0.418947	-0.174433
156	510.829	458.525	-18.6644	23.3922	-0.325011	0.407337
157	523.029	1272.03	15.6271	-66.77	0.272121	-1.16269
158	515.55	1438.96	58.4531	-10.059	1.01787	-0.175162
159	498.227	405.899	73.9592	-8.91687	1.28788	-0.155273
160	509.337	868.688	-21.7934	57.9526	-0.379498	1.00915
161	514.731	1118.76	18.3864	-7.13538	0.320171	-0.124251
163	514.563	48.1358	4.02465	-15.7837	0.0700828	-0.274848
164	531.026	104.443	35.1261	7.67221	0.611665	0.133599
165	521.617	1360.32	45.3605	-25.6673	0.789881	-0.446955
166	531.209	988.442	28.3082	12.0313	0.492942	0.209505
167	534.419	527.193	-27.4082	66.1796	-0.47727	1.15241
169	555.219	184.761	26.181	-8.59075	0.455901	-0.149594
170	551.56	289.091	103.6	55.1148	1.80404	0.959736
171	543.543	1170.96	-38.617	-18.3722	-0.672453	-0.319922
172	549.345	1505.96	13.3561	-112.835	0.232575	-1.96484
173	548.081	762.519	-78.2801	-77.9803	-1.36312	-1.3579
174	565.79	1057.06	62.7665	0.934836	1.09298	0.0162787
175	547.945	632.242	-59.0131	-14.9693	-1.02762	-0.260666
176	555.374	883.587	9.37018	3.82641	0.163167	0.0666309
177	592.054	674.079	139.422	-117.787	2.42782	-2.05107
178	586.34	1344.73	22.0653	42.0054	0.384233	0.731457
179	577.437	458.031	1.72495	16.9479	0.0300372	0.295121
180	595.029	575.058	149.929	-5.24554	2.61077	-0.0913427
181	591.987	61.0849	22.9009	41.2544	0.398783	0.71838
182	595.679	1246.69	28.8856	-13.882	0.502996	-0.241732
183	594.8	1431.38	61.2636	36.176	1.06681	0.629948
184	604.855	812.453	149.767	-44.4476	2.60796	-0.773984
185	590.942	988.137	47.9377	-8.82357	0.834759	-0.153648
186	614.635	137.644	145.767	-33.2268	2.53831	-0.578592
188	607.65	897.887	50.6071	-103.584	0.881242	-1.80374
189	613.727	263.858	39.093	-75.9587	0.680741	-1.3227
190	625.862	752.118	23.5452	5.53563	0.410002	0.0963941
192	622.141	1180.43	-2.92456	-64.7196	-0.0509265	-1.12699
193	633.112	443.358	68.2028	-33.4033	1.18764	-0.581665
194	632.012	188.406	-33.4582	18.5771	-0.582622	0.323491
195	640.441	327.642	19.8626	-60.8254	0.345875	-1.05918
196	626.863	1057.55	-97.0283	81.4491	-1.68959	1.41831
197	665.746	1127.97	-19.1232	6.22238	-0.332999	0.108353
198	667.34	964.235	13.6017	-81.6959	0.236852	-1.4226
200	643.402	716.771	-22.2939	23.408	-0.388213	0.407613
201	655.587	1467.38	84.9965	108.176	1.48008	1.88372
202	657.99	557.899	12.679	-164.212	0.220785	-2.85949
203	651.124	1352.14	-1.87744	31.9557	-0.0326925	0.556458
204	650.496	57.6783	95.0444	-3.22825	1.65505	-0.0562148
205	673.946	677.568	104.817	76.7663	1.82522	1.33676
206	677.064	215.918	143.849	23.1068	2.50489	0.402368
207	667.974	817.748	79.8575	42.0944	1.39059	0.733007
208	681.551	1272.05	64.7393	28.2773	1.12733	0.492404
210	697.711	881.939	-7.73618	54.8637	-0.134713	0.955364
211	700.617	143.494	70.4862	82.7385	1.2274	1.44076
212	694.143	423.363	-3.94219	26.1933	-0.068647	0.456115
213	699.729	1395.03	-0.155664	92.1983	-0.00271063	1.60549
214	708.87	606.371	-10.8013	-66.177	-0.188087	-1.15237
215	698.728	298.861	159.288	-58.7721	2.77375	-1.02342
216	731.831	1020.53	-22.9215	-8.68509	-0.399142	-0.151237
217	728.982	1524.17	56.8049	19.1903	0.989166	0.334168
218	734.652	750.073	20.1212	25.9209	0.350379	0.451371
219	736.644	822.692	133.677	57.7462	2.32777	1.00556
220	714.26	1094.03	70.9727	-19.429	1.23588	-0.338326
222	745.529	534.084	-3.49555	109.99	-0.0608695	1.9153
223	745.448	1191.35	75.7873	-22.1067	1.31972	-0.384953
224	753.535	95.8727	6.34926	13.1296	0.110562	0.228631
225	735.396	1466.81	-41.5464	75.3819	-0.723464	1.31266
226	740.578	1282.94	-35.2885	86.703	-0.614494	1.50979
227	755.693	253.181	87.0982	-26.4352	1.51668	-0.460327
228	750.194	1129.92	10.6603	-69.0484	0.185633	-1.20237
229	753.589	375.102	96.5769	19.8343	1.68173	0.345382
230	762.38	654.884	-16.5815	-114.293	-0.28874	-1.99024
231	771.926	473.37	61.0295	46.5177	1.06273	0.810032
232	773.292	902.443	116.941	84.1741	2.03635	1.46576
233	754.079	1402.77	-46.1985	-77.6583	-0.804473	-1.35229
234	779.517	977.329	116.639	-17.8294	2.03108	-0.31047
235	771.291	177.82	39.2294	53.4214	0.683118	0.930249
237	782.282	1071.64	52.3399	59.7303	0.911416	1.04011
238	797.466	126.647	37.5752	-4.5935	0.654312	-0.0799885
239	813.445	1363.22	49.2304	-5.13506	0.857269	-0.0894189
240	804.528	1468.56	-17.7349	-49.8431	-0.308825	-0.867938
241	801.587	1273.16	68.8295	-25.772	1.19856	-0.448777
243	811.005	295.989	-36.7045	55.0902	-0.639151	0.959308
244	797.034	843.032	64.8516	147.763	1.12929	2.57305
245	821.167	608.049	42.5936	51.4647	0.7417	0.896175
246	817.127	722.538	53.338	17.5792	0.928796	0.306114
247	822.707	395.809	74.3662	32.2395	1.29497	0.561399
248	847.685	825.653	75.5086	51.4582	1.31486	0.896063
249	818.879	1192.36	-22.5482	23.8255	-0.392641	0.414883
250	830.707	1091.01	15.9013	-30.368	0.276897	-0.52881
251	834.041	507.029	-26.6782	-18.6479	-0.464559	-0.324724
252	835.373	204.514	36.6255	-0.189929	0.637775	-0.0033073
254	838.249	86.814	27.7655	-4.51111	0.483492	-0.0785537
255	861.483	1020.11	-14.6702	16.3263	-0.255458	0.284297
256	841.67	921.727	-59.0939	74.9017	-1.02903	1.30429
257	862.004	1145.21	50.8631	-25.5426	0.885699	-0.444783
258	876.666	1277.18	63.8454	13.3017	1.11177	0.231629
260	873.342	325.781	192.63	67.0256	3.35434	1.16714
261	887.567	1414.63	25.7144	-3.82708	0.447776	-0.0666425
262	880.579	562.099	-4.85927	31.818	-0.0846165	0.554061
263	869.997	1500.61	-9.45034	-33.1742	-0.164563	-0.577676
264	892.723	155.161	91.5295	-34.5482	1.59384	-0.601603
265	881.275	707.286	-3.71364	-16.6384	-0.0646671	-0.289731
266	889.623	248.549	40.8096	46.6929	0.710634	0.813083
267	880.52	411.593	-7.35759	7.53452	-0.128121	0.131202
268	886.463	947.298	81.4956	19.211	1.41912	0.334529
269	897.911	1192.99	58.2695	-77.569	1.01467	-1.35074
270	903.209	70.0968	2.86802	30.6489	0.0499421	0.533701
272	918.691	466.959	55.8065	60.3445	0.971781	1.0508
273	920.515	630.711	107.378	3.98215	1.86981	0.0693427
274	927.68	1346.87	54.0611	-37.9968	0.941388	-0.661654
275	914.094	1103.9	-46.3579	49.7376	-0.807249	0.866101
276	914.427	833.837	156.803	-24.7753	2.73047	-0.431422
277	934.55	749.821	45.016	22.325	0.783883	0.388753
279	936.701	339.453	77.9153	-29.8961	1.35677	-0.520593
280	926.178	964.629	103.094	-142.98	1.79522	-2.48976
281	948.455	1446.53	61.2692	-24.363	1.0669	-0.424242
282	944.645	253.19	72.3085	50.4601	1.25914	0.878683
283	945.665	161.033	81.8817	23.6193	1.42584	0.411293
284	960.709	1185.21	73.5883	109.524	1.28142	1.90719
285	968.029	877.11	-7.05142	-6.87561	-0.122789	-0.119728
286	975.646	636.044	-16.0007	32.8801	-0.278626	0.572554
287	980.012	517.764	8.7396	0.622703	0.152186	0.0108434
288	965.216	1016.8	-10.9047	-20.8522	-0.189888	-0.363108
289	981.746	1081.77	-8.91711	-1.74656	-0.155277	-0.0304136
290	970.096	69.0718	-7.95814	29.5279	-0.138578	0.514181
291	980.605	1517.33	-27.6784	-73.5829	-0.481976	-1.28133
293	970.993	1296.19	93.7737	10.2706	1.63292	0.178846
295	1003.69	379.025	33.5905	-4.51146	0.584925	-0.0785599
296	1006.7	758.386	47.2359	-37.1178	0.822537	-0.646347
297	1004.88	267.224	52.6084	-9.70947	0.916091	-0.169075
298	995.315	147.812	55.0939	-37.8862	0.959372	-0.659727
299	1014.62	1440.02	-5.55691	-55.8673	-0.0967647	-0.97284
301	1016.65	1279.01	-3.18333	23.7682	-0.0554326	0.413885
302	1012.66	870.94	63.7766	-8.88261	1.11057	-0.154676
303	1050.7	1359.91	65.3753	-64.5833	1.13841	-1.12462
304	1035.68	1108.3	56.7957	13.0319	0.989007	0.22693
305	1027.06	466.573	52.0247	-112.72	0.905928	-1.96285
306	1040.2	204.083	-25.447	-28.0001	-0.443119	-0.487576
307	1039.79	971.696	56.1998	-13.7583	0.978629	-0.239579
308	1047.88	1203.86	81.922	-45.2583	1.42654	-0.788101
309	1038.75	585.362	82.2433	-2.71304	1.43214	-0.0472433
310	1041.37	83.9912	14.6	-4.17393	0.254236	-0.0726823
311	1028.93	1541.65	-5.99487	53.3634	-0.104391	0.929239
312	1045.72	657.049	-3.3736	-23.242	-0.0587459	-0.404723
314	1082.27	707.103	25.0931	-33.3013	0.436956	-0.579889
315	1057.65	1500.11	0.670054	4.05358	0.0116679	0.0705866
317	1076.96	288.288	8.92211	-0.593227	0.155364	-0.0103301
318	1058.51	785.981	113.172	-39.1011	1.97071	-0.680883
319	1085.42	849.828	34.7438	-22.3687	0.605007	-0.389516
320	1081.47	154.878	12.0449	-7.26069	0.209743	-0.126433
321	1088.93	911.311	17.2811	-43.6921	0.300922	-0.760829
322	1077.18	448.252	8.7937	56.5713	0.153128	0.985099
324	1082.29	1035.79	-22.2791	-36.2807	-0.387955	-0.63177
325	1097.29	1456.78	-31.5367	-72.9515	-0.549161	-1.27033
326	1097.98	1150.68	-18.5176	49.731	-0.322454	0.865987
327	1076.85	1273.07	-4.13987	110.431	-0.0720893	1.92299
328	1092.18	585.92	69.5086	65.7057	1.21038	1.14416
330	1114.85	344.611	17.4734	-35.9928	0.304272	-0.626758
332	1108.11	1231.76	-29.8649	-38.0914	-0.52005	-0.663301
333	1105.83	1363.57	-52.8418	2.44921	-0.920155	0.0426492
334	1130.99	207.422	44.5729	-65.7589	0.776167	-1.14509
335	1132.75	800.656	6.80381	89.4035	0.118477	1.55682
336	1130.77	962.144	29.9722	-47.4093	0.521917	-0.825558
337	1133.23	1070.56	13.1032	-52.0499	0.228171	-0.906366
338	1140.08	487.174	81.8451	1.36148	1.4252	0.0237081
339	1148.67	1285.9	-2.81874	-117.765	-0.0490838	-2.0507
340	1132.85	1491.01	-15.6063	-17.4492	-0.27176	-0.30385
341	1138.61	138.272	5.59826	-0.2215	0.0974848	-0.00385708
342	1148.01	67.133	43.392	49.4954	0.755602	0.861883
343	1143.05	405.477	87.9389	22.5621	1.53132	0.392883
345	1151.87	569.465	90.9162	71.6112	1.58316	1.24699
346	1158.25	275.509	29.6363	-72.7214	0.516068	-1.26633
349	1150.16	1186.91	-28.9742	-64.4987	-0.504539	-1.12314
350	1176.2	1411.27	135.474	-60.8424	2.35906	-1.05947
351	1180.23	1119.72	4.48887	-92.5232	0.0781665	-1.61114
353	1193.01	926.983	51.2374	-25.2701	0.892218	-0.440038
354	1193.12	1020.16	-2.83825	15.1344	-0.0494236	0.263542
355	1191.93	1315.39	-60.8646	-49.3341	-1.05986	-0.859075
356	1202.09	1494.41	-42.6543	-0.271818	-0.742756	-0.00473328
357	1215.13	423.614	90.8172	-4.403	1.58144	-0.0766712
358	1191.3	143.916	-71.9749	-35.3243	-1.25333	-0.615117
359	1229.45	352.184	40.2287	-27.4799	0.700519	-0.478519
360	1201.9	50.6166	-0.615149	-29.5653	-0.0107118	-0.514833
361	1228.97	213.741	13.6157	-20.9694	0.237095	-0.365149
362	1228.86	502.303	60.474	-2.87785	1.05306	-0.0501132
363	1224.09	1177.99	-0.896245	-15.7717	-0.0156067	-0.274639
364	1225.31	603.731	97.249	-12.3829	1.69344	-0.215628
365	1208.3	277.573	-4.99266	36.9719	-0.0869392	0.643807
366	1236.49	1262.56	140.055	-1.08716	2.43883	-0.0189312
367	1241.65	1375.24	30.4421	-54.0722	0.530101	-0.941581
370	1242.09	128.01	58.2319	64.3589	1.01402	1.12071
372	1242.55	1458.09	23.8814	8.84647	0.415856	0.154047
375	1262.07	74.575	14.6187	42.7013	0.254562	0.743575
